# Supplementary material for: Interactions between the intestinal microbiome and host genes in regulating vibriosis resistance in Cynoglossus semilaevis
Source: Front Immunol. 2025 Sep 3;16:1644885. doi: 10.3389/fimmu.2025.1644885 (PMC12440730; doi:10.3389/fimmu.2025.1644885)
Supplement: Supplementary file 7 [file Table6.xlsx]

## Sheet: R vs C
Gene_id	R_1	R_2	R_3	C_1	C_2	C_3	R	C	log2FoldChange	pvalue	padj	gene_name	gene_chr	gene_start	gene_end	gene_strand	gene_length	gene_biotype	gene_description	Family
103391142	334.739	529.862	381.137	65.8919	98.1905	51.2668	415.246	71.783	2.53489	1.02e-12	1.85e-08	LOC103391142	NC_024321.1	14337718	14348175	-	4300	protein_coding	FH2 domain-containing protein 1-like%2C transcript variant X3 && sp|Q3ULZ2|FHDC1_MOUSE FH2 domain-containing protein 1 OS=Mus musculus OX=10090 GN=Fhdc1 PE=1 SV=3 && PF02181:Formin Homology 2 Domain	-
103385983	1217.71	927.484	893.451	12473.4	16184.7	3297.16	1012.88	10651.8	-3.39448	6.26e-12	5.67e-08	LOC103385983	NC_024307.1	23201527	23204480	+	1426	protein_coding	purine nucleoside phosphorylase-like && sp|P00491|PNPH_HUMAN Purine nucleoside phosphorylase OS=Homo sapiens OX=9606 GN=PNP PE=1 SV=2 && PF01048:Phosphorylase superfamily	-
103399902	4.3929	7.24597	0	93.0854	137.244	63.3295	3.87962	97.8861	-4.62223	1.08e-11	6.54e-08	LOC103399902	NC_024308.1	14081303	14085312	+	2166	protein_coding	alanine aminotransferase 2-like%2C transcript variant X1 && sp|Q6GM82|ALAT2_XENLA Alanine aminotransferase 2 OS=Xenopus laevis OX=8355 GN=gpt2 PE=2 SV=1 && PF00155:Aminotransferase class I and II	-
103389747	12.3001	4.52873	5.16446	404.765	524.426	31.1622	7.3311	320.118	-5.44137	2.15e-11	9.76e-08	LOC103389747	NC_024320.1	15517748	15525146	+	2652	protein_coding	uncharacterized LOC103389747 && - && PF00059:Lectin C-type domain	-
103384202	239.852	185.678	268.552	1374.32	665.017	1215.32	231.361	1084.89	-2.22996	9.33e-11	3.38e-07	LOC103384202	NC_024315.1	16759387	16761075	+	1689	protein_coding	transcription factor jun-B%2C transcript variant X1 && sp|P79703|JUNB_CYPCA Transcription factor jun-B OS=Cyprinus carpio OX=7962 GN=junb PE=2 SV=1 && PF03957:Jun-like transcription factor|PF00170:bZIP transcription factor	TF_bZIP
103398452	14.0573	26.2666	44.4143	281.348	151.749	232.208	28.2461	221.768	-2.98191	1.59e-10	4.28e-07	gadd45b	NC_024308.1	10562292	10563824	+	1042	protein_coding	growth arrest and DNA damage inducible beta && sp|Q5E9A5|GA45B_BOVIN Growth arrest and DNA damage-inducible protein GADD45 beta OS=Bos taurus OX=9913 GN=GADD45B PE=2 SV=1 && PF01248:Ribosomal protein L7Ae/L30e/S12e/Gadd45 family	-
103390007	1078.9	5374.7	4929.99	357.699	120.506	385.003	3794.53	287.736	3.7207	1.65e-10	4.28e-07	LOC103390007	NC_024320.1	18962935	18967094	-	1653	protein_coding	betaine--homocysteine S-methyltransferase 1-like && sp|Q32LQ4|BHMT1_DANRE Betaine--homocysteine S-methyltransferase 1 OS=Danio rerio OX=7955 GN=bhmt PE=2 SV=1 && PF02574:Homocysteine S-methyltransferase	-
103385055	162.537	63.4023	101.223	1205.93	2137.87	399.077	109.054	1247.63	-3.5155	3.06e-10	6.94e-07	slc2a5	NC_024316.1	12299430	12304920	-	2137	protein_coding	solute carrier family 2 member 5%2C transcript variant X1 && sp|Q5RET7|GTR5_PONAB Solute carrier family 2, facilitated glucose transporter member 5 OS=Pongo abelii OX=9601 GN=SLC2A5 PE=2 SV=1 && PF00083:Sugar (and other) transporter	-
103382949	952.38	944.694	1090.73	18.8263	20.0844	145.758	995.936	61.5564	4.01352	8.52e-10	1.72e-06	slc5a8	NC_024314.1	27441627	27448016	-	2702	protein_coding	solute carrier family 5 member 8 && sp|Q7SYH5|SC5A8_XENLA Sodium-coupled monocarboxylate transporter 1 OS=Xenopus laevis OX=8355 GN=slc5a8 PE=2 SV=1 && -	-
103398022	68.5292	28.9839	28.921	12359.4	30489.3	185.968	42.1447	14344.9	-8.41053	7.53e-09	1.28e-05	LOC103398022	NC_024328.1	14611334	14613396	+	1350	protein_coding	natterin-3-like && sp|Q66S17|NATT3_THANI Natterin-3 OS=Thalassophryne nattereri OX=289382 PE=1 SV=1 && PF11901:Protein of unknown function (DUF3421)	-
103399918	316.289	162.129	55.7761	20.9181	11.158	10.0523	178.064	14.0428	3.66538	7.77e-09	1.28e-05	LOC103399918	NC_024308.1	14651956	14653855	+	1033	protein_coding	serine protease 57-like%2C transcript variant X2 && sp|Q6IE59|PRS57_RAT Serine protease 57 OS=Rattus norvegicus OX=10116 GN=Prss57 PE=2 SV=2 && PF00089:Trypsin	-
103393623	4.3929	0.905746	0	256.246	61.369	18.0942	1.76621	111.903	-5.9451	2.41e-08	3.64e-05	LOC103393623	NC_024323.1	14545212	14552073	+	1513	protein_coding	homeobox protein Dlx3b-like && sp|Q01702|DLX3B_DANRE Homeobox protein Dlx3b OS=Danio rerio OX=7955 GN=dlx3b PE=2 SV=1 && -	Homeobox
103398021	136.18	9.96321	29.9538	9659.96	32650.6	653.4	58.6989	14321.3	-7.9301	1.02e-07	0.000137763	LOC103398021	NC_024328.1	14607832	14609474	+	1354	protein_coding	natterin-3-like && sp|Q66S17|NATT3_THANI Natterin-3 OS=Thalassophryne nattereri OX=289382 PE=1 SV=1 && -	-
103392517	1.75716	5.43448	5.16446	82.6264	49.0952	30.1569	4.1187	53.9595	-3.72346	1.06e-07	0.000137763	serpinc1	NC_024308.1	239982	242926	+	1727	protein_coding	serpin family C member 1 && sp|P32261|ANT3_MOUSE Antithrombin-III OS=Mus musculus OX=10090 GN=Serpinc1 PE=1 SV=1 && PF00079:Serpin (serine protease inhibitor)	-
103385059	405.904	287.122	381.137	1020.8	1446.08	835.347	358.054	1100.74	-1.62011	1.14e-07	0.00013778	slc25a33	NC_024316.1	12351017	12358460	+	2345	protein_coding	solute carrier family 25 member 33 && sp|Q6P036|S2533_DANRE Solute carrier family 25 member 33 OS=Danio rerio OX=7955 GN=slc25a33 PE=2 SV=1 && PF00153:Mitochondrial carrier protein	-
103377502	23.7216	76.0827	338.788	8.36723	4.4632	7.03661	146.198	6.62235	4.4599	1.22e-07	0.00013778	cip2a	NC_024309.1	16012443	16019476	-	3205	protein_coding	cell proliferation regulating inhibitor of protein phosphatase 2A && sp|Q8BWY9|CIP2A_MOUSE Protein CIP2A OS=Mus musculus OX=10090 GN=Cip2a PE=1 SV=3 && -	-
103377813	1.75716	1.81149	1.03289	185.125	205.307	1.00523	1.53385	130.479	-6.40005	1.48e-07	0.000158296	LOC103377813	NC_024310.1	6267784	6277277	-	2118	protein_coding	alkaline phosphatase-like && sp|P08289|PPBT_RAT Alkaline phosphatase, tissue-nonspecific isozyme OS=Rattus norvegicus OX=10116 GN=Alpl PE=1 SV=2 && PF00245:Alkaline phosphatase	-
103379717	198.559	277.158	274.749	88.9018	71.4113	91.476	250.155	83.9297	1.57385	1.79e-07	0.000180253	fuk	NC_024312.1	4628408	4639445	-	4012	protein_coding	fucokinase && sp|Q7TMC8|FCSK_MOUSE L-fucose kinase OS=Mus musculus OX=10090 GN=Fcsk PE=1 SV=1 && PF07959:L-fucokinase	-
112488101	573.712	320.634	102.256	2154.56	3199	1530.97	332.201	2294.84	-2.78748	2.09e-07	0.000199838	LOC112488101	NC_024320.1	1760756	1762692	-	1187	protein_coding	liver-expressed antimicrobial peptide 2-like && sp|Q95JB4|LEAP2_PIG Liver-expressed antimicrobial peptide 2 OS=Sus scrofa OX=9823 GN=LEAP2 PE=3 SV=1 && -	-
103398820	335.617	184.772	205.545	78.4427	64.7165	59.3086	241.978	67.4893	1.84299	2.48e-07	0.000220475	LOC103398820	NW_007585130.1	18643	33084	-	3153	protein_coding	angiopoietin-related protein 1-like && sp|Q1RMR1|ANGL1_BOVIN Angiopoietin-related protein 1 OS=Bos taurus OX=9913 GN=ANGPTL1 PE=2 SV=1 && -	-
103383435	278.51	192.018	144.605	39.7443	59.1374	59.3086	205.044	52.7301	1.96064	2.62e-07	0.000220475	apob	NC_024307.1	18796166	18816747	-	13342	protein_coding	apolipoprotein B && sp|P04114|APOB_HUMAN Apolipoprotein B-100 OS=Homo sapiens OX=9606 GN=APOB PE=1 SV=2 && PF01347:Lipoprotein amino terminal region|PF09172:Domain of unknown function (DUF1943)|PF06448:Domain of Unknown Function (DUF1081)	-
103380584	10.543	9.96321	0	54.387	187.455	81.4237	6.83539	107.755	-3.95811	2.67e-07	0.000220475	LOC103380584	NC_024312.1	18793750	18822311	+	4155	lncRNA	uncharacterized LOC103380584%2C transcript variant X3 && sp|Q9TTR7|COT2_BOVIN COUP transcription factor 2 OS=Bos taurus OX=9913 GN=NR2F2 PE=2 SV=1 && -	-
103392532	3487.08	2337.73	1913.95	14552.7	35967.8	5532.79	2579.59	18684.4	-2.85658	3.2e-07	0.000245367	LOC103392532	NC_024323.1	559666	566262	+	1745	protein_coding	ectonucleotide pyrophosphatase/phosphodiesterase family member 7-like && sp|Q6UWV6|ENPP7_HUMAN Ectonucleotide pyrophosphatase/phosphodiesterase family member 7 OS=Homo sapiens OX=9606 GN=ENPP7 PE=1 SV=3 && PF01663:Type I phosphodiesterase / nucleotide pyrophosphatase	-
103384296	52.7148	26.2666	40.2828	1.0459	3.3474	3.01569	39.7547	2.46967	4.01355	3.25e-07	0.000245367	LOC103384296	NC_024315.1	18369473	18396644	+	4433	protein_coding	glycine receptor subunit alpha-3%2C transcript variant X3 && sp|P24524|GLRA3_RAT Glycine receptor subunit alpha-3 OS=Rattus norvegicus OX=10116 GN=Glra3 PE=1 SV=1 && PF02932:Neurotransmitter-gated ion-channel transmembrane region|PF02931:Neurotransmitter-gated ion-channel ligand binding domain	-
103396539	1.75716	1.81149	2.06578	138.059	123.854	3.01569	1.87814	88.3096	-5.55787	3.92e-07	0.000284194	LOC103396539	NC_024326.1	11190919	11197735	+	4924	protein_coding	cholesterol 7-alpha-monooxygenase && sp|P22680|CP7A1_HUMAN Cytochrome P450 7A1 OS=Homo sapiens OX=9606 GN=CYP7A1 PE=1 SV=2 && PF00067:Cytochrome P450	-
103391287	294.324	267.195	236.532	878.559	589.143	1547.05	266.017	1004.92	-1.91743	4.53e-07	0.000315697	LOC103391287	NC_024321.1	17036859	17038235	+	953	protein_coding	DNA damage-inducible transcript 4-like protein && sp|Q20A00|DDT4L_ONCMY DNA damage-inducible transcript 4-like protein OS=Oncorhynchus mykiss OX=8022 GN=ddit4l PE=2 SV=1 && PF07809:RTP801 C-terminal region	-
103384117	969.073	885.82	498.887	2271.7	2212.63	4255.14	784.593	2913.16	-1.89231	5.66e-07	0.00038052	LOC103384117	NC_024307.1	20018425	20023590	+	2208	protein_coding	uncharacterized LOC103384117 && - && -	-
103384363	1845.02	1970.9	1677.42	4305.98	6942.51	3893.26	1831.11	5047.25	-1.46268	6.49e-07	0.000420688	LOC103384363	NC_024315.1	19542334	19546061	-	1237	protein_coding	group XIIB secretory phospholipase A2-like protein && sp|Q9BX93|PG12B_HUMAN Group XIIB secretory phospholipase A2-like protein OS=Homo sapiens OX=9606 GN=PLA2G12B PE=1 SV=2 && PF06951:Group XII secretory phospholipase A2 precursor (PLA2G12)	-
103397579	174.837	124.087	71.2695	1061.59	306.845	612.185	123.398	660.207	-2.41832	8.38e-07	0.000523855	LOC103397579	NC_024328.1	5093750	5099630	+	2567	protein_coding	calcium-binding mitochondrial carrier protein SCaMC-2-A-like && sp|Q6NYZ6|SCM2A_DANRE Calcium-binding mitochondrial carrier protein SCaMC-2-A OS=Danio rerio OX=7955 GN=slc25a25a PE=2 SV=1 && PF00153:Mitochondrial carrier protein	-
107988778	1403.97	566.997	575.32	4345.73	4879.4	2262.77	848.762	3829.3	-2.17338	9.32e-07	0.000563544	LOC107988778	NC_024313.1	6033750	6034151	+	314	lncRNA	uncharacterized LOC107988778 && - && -	-
103386008	18.4502	19.9264	36.1512	3684.72	4521.23	40.2092	24.8426	2748.72	-6.79066	1.11e-06	0.000620167	LOC103386008	NC_024317.1	4660845	4662627	+	1782	protein_coding	ammonium transporter Rh type B-like && sp|Q0IIV2|RHBG_XENTR Ammonium transporter Rh type B OS=Xenopus tropicalis OX=8364 GN=rhbg PE=2 SV=1 && PF00909:Ammonium Transporter Family	-
103387069	818.836	967.337	1145.48	415.224	362.635	467.432	977.217	415.097	1.2346	1.11e-06	0.000620167	LOC103387069	NC_024318.1	4151210	4168219	+	2989	protein_coding	equilibrative nucleoside transporter 1%2C transcript variant X1 && sp|Q99808|S29A1_HUMAN Equilibrative nucleoside transporter 1 OS=Homo sapiens OX=9606 GN=SLC29A1 PE=1 SV=3 && PF01733:Nucleoside transporter	-
103383713	14.9358	96.9149	422.453	12.5508	3.3474	8.04185	178.101	7.98003	4.47555	1.13e-06	0.000620167	melk	NC_024315.1	8061673	8068198	-	2702	protein_coding	maternal embryonic leucine zipper kinase%2C transcript variant X1 && sp|F1QGZ6|MELK_DANRE Maternal embryonic leucine zipper kinase OS=Danio rerio OX=7955 GN=melk PE=2 SV=1 && PF00069:Protein kinase domain|PF02149:Kinase associated domain 1	-
112488083	41.2932	43.4758	80.5655	9.41313	8.92641	5.02615	55.1115	7.78856	2.8249	1.44e-06	0.000769545	LOC112488083	NC_024320.1	8161684	8180471	-	2104	lncRNA	uncharacterized LOC112488083%2C transcript variant X1 && sp|Q6RVG2|S4A8_RAT Electroneutral sodium bicarbonate exchanger 1 OS=Rattus norvegicus OX=10116 GN=Slc4a8 PE=1 SV=1 && -	-
103388201	5.27148	2.71724	2.06578	508.309	357.056	11.0575	3.3515	292.141	-6.43928	1.64e-06	0.000848728	LOC103388201	NC_024319.1	4362868	4366082	-	1287	protein_coding	aquaporin-10 && sp|Q96PS8|AQP10_HUMAN Aquaporin-10 OS=Homo sapiens OX=9606 GN=AQP10 PE=1 SV=2 && PF00230:Major intrinsic protein	-
103392402	565.805	521.71	564.992	2560.37	4016.88	934.865	550.836	2504.04	-2.18449	2.03e-06	0.00102203	LOC103392402	NC_024322.1	16298434	16315573	+	4903	protein_coding	glutaminase kidney isoform%2C mitochondrial-like%2C transcript variant X1 && sp|P13264|GLSK_RAT Glutaminase kidney isoform, mitochondrial OS=Rattus norvegicus OX=10116 GN=Gls PE=1 SV=2 && PF17959:EF-hand domain|PF12796:Ankyrin repeats (3 copies)|PF04960:Glutaminase	-
103394268	28869.2	6008.72	21840.5	137037	226826	46246.6	18906.1	136703	-2.85412	2.55e-06	0.00125194	LOC103394268	NC_024324.1	9247162	9248640	-	620	protein_coding	type-4 ice-structuring protein LS-12-like && sp|Q8JI37|AFP4_PAROL Type-4 ice-structuring protein OS=Paralichthys olivaceus OX=8255 PE=3 SV=1 && -	-
103382352	236.338	237.306	162.164	688.204	736.429	417.171	211.936	613.935	-1.53323	2.84e-06	0.00135661	baiap2l1	NC_024314.1	13124567	13143925	+	3052	protein_coding	BAI1 associated protein 2 like 1 && sp|Q9DBJ3|BI2L1_MOUSE Brain-specific angiogenesis inhibitor 1-associated protein 2-like protein 1 OS=Mus musculus OX=10090 GN=Baiap2l1 PE=1 SV=1 && PF14604:Variant SH3 domain|PF08397:IRSp53/MIM homology domain	-
103389709	5.27148	1.81149	4.13157	57.5247	291.224	4.02092	3.73818	117.59	-4.97468	3.28e-06	0.00152359	LOC103389709	NC_024320.1	14444427	14630272	+	5951	protein_coding	interleukin-1 receptor accessory protein-like 1%2C transcript variant X5 && sp|Q9NZN1|IRPL1_HUMAN Interleukin-1 receptor accessory protein-like 1 OS=Homo sapiens OX=9606 GN=IL1RAPL1 PE=1 SV=2 && PF18452:Immunoglobulin domain|PF13927:Immunoglobulin domain|PF01582:TIR domain	-
103382245	5.27148	1.81149	17.5592	193.492	226.508	15.0785	8.21404	145.026	-4.15578	4.09e-06	0.00180721	slc16a12	NC_024314.1	14452930	14461417	-	3754	protein_coding	solute carrier family 16 member 12%2C transcript variant X1 && sp|Q503M4|MT12B_DANRE Monocarboxylate transporter 12-B OS=Danio rerio OX=7955 GN=slc16a12b PE=2 SV=1 && PF07690:Major Facilitator Superfamily	-
103379956	136.18	137.673	141.506	307.496	276.719	382.993	138.453	322.402	-1.22021	4.18e-06	0.00180721	LOC103379956	NC_024312.1	7383328	7385584	-	1708	protein_coding	cyclin-dependent kinase inhibitor 1B-like && sp|P49918|CDN1C_HUMAN Cyclin-dependent kinase inhibitor 1C OS=Homo sapiens OX=9606 GN=CDKN1C PE=1 SV=1 && PF02234:Cyclin-dependent kinase inhibitor	-
103385157	14.9358	4.52873	0	25.1017	141.707	190.994	6.48819	119.267	-4.18276	4.76e-06	0.00200596	LOC103385157	NC_024316.1	14125354	14134614	+	3251	protein_coding	tripartite motif-containing protein 54-like%2C transcript variant X2 && sp|Q9BYV6|TRI55_HUMAN Tripartite motif-containing protein 55 OS=Homo sapiens OX=9606 GN=TRIM55 PE=1 SV=2 && PF13445:RING-type zinc-finger|PF00643:B-box zinc finger	-
103383857	69.4078	10.869	54.7432	340.964	332.509	169.884	45.0067	281.119	-2.64329	4.99e-06	0.00203225	LOC103383857	NC_024315.1	10842071	10848050	+	2367	protein_coding	tetratricopeptide repeat protein 39B && sp|Q28DB0|TT39B_XENTR Tetratricopeptide repeat protein 39B OS=Xenopus tropicalis OX=8364 GN=ttc39b PE=2 SV=1 && PF10300:Protein of unknown function (DUF3808)	-
103389686	40.4146	58.8735	100.19	1582.45	108.233	369.925	66.4929	686.87	-3.3702	5.04e-06	0.00203225	LOC103389686	NC_024307.1	28782571	28784899	+	1408	protein_coding	myelin-oligodendrocyte glycoprotein-like && - && PF07686:Immunoglobulin V-set domain	-
103397884	57.1076	86.0459	47.513	3.13771	16.737	6.03138	63.5555	8.63537	2.89313	5.62e-06	0.00221788	LOC103397884	NC_024328.1	10088925	10091441	-	1102	protein_coding	conserved oligomeric Golgi complex subunit 7-like && sp|P83436|COG7_HUMAN Conserved oligomeric Golgi complex subunit 7 OS=Homo sapiens OX=9606 GN=COG7 PE=1 SV=1 && PF10191:Golgi complex component 7 (COG7)	-
103388124	31.6289	0.905746	1.03289	2088.67	5283.32	188.983	11.1892	2520.32	-7.81209	5.75e-06	0.00221788	LOC103388124	NC_024319.1	3523142	3526299	+	1871	protein_coding	ectonucleotide pyrophosphatase/phosphodiesterase family member 7-like && sp|Q6UWV6|ENPP7_HUMAN Ectonucleotide pyrophosphatase/phosphodiesterase family member 7 OS=Homo sapiens OX=9606 GN=ENPP7 PE=1 SV=3 && PF01663:Type I phosphodiesterase / nucleotide pyrophosphatase	-
103390742	318.046	182.055	226.203	63.8001	61.369	102.534	242.101	75.9009	1.67209	6.04e-06	0.00228201	efemp2	NC_024321.1	7530647	7543348	+	2729	protein_coding	EGF containing fibulin extracellular matrix protein 2%2C transcript variant X1 && sp|O95967|FBLN4_HUMAN EGF-containing fibulin-like extracellular matrix protein 2 OS=Homo sapiens OX=9606 GN=EFEMP2 PE=1 SV=3 && PF12662:Complement Clr-like EGF-like|PF07645:Calcium-binding EGF domain	-
103395935	391.846	380.414	339.821	789.657	2164.65	958.99	370.694	1304.43	-1.81481	6.2e-06	0.00229611	LOC103395935	NC_024326.1	1914146	1928158	-	6890	protein_coding	cyclic AMP-responsive element-binding protein 3-like protein 3-B%2C transcript variant X1 && sp|Q1LYG4|CR3LB_DANRE Cyclic AMP-responsive element-binding protein 3-like protein 3-B OS=Danio rerio OX=7955 GN=creb3l3b PE=3 SV=2 && PF00170:bZIP transcription factor	TF_bZIP
103381131	22.8431	109.595	525.742	9.41313	13.3896	23.1203	219.393	15.3077	3.83861	6.59e-06	0.0023911	pbk	NC_024313.1	10425971	10428923	-	1397	protein_coding	PDZ binding kinase%2C transcript variant X1 && sp|Q6DHU8|TOPK_DANRE Lymphokine-activated killer T-cell-originated protein kinase homolog OS=Danio rerio OX=7955 GN=pbk PE=2 SV=1 && PF00069:Protein kinase domain	-
103391869	28.1145	59.7793	14.4605	1.0459	0	2.01046	34.1181	1.01879	5.03249	7.02e-06	0.00249759	hoxd9	NC_024322.1	6534838	6544935	+	5922	protein_coding	homeobox D9%2C transcript variant X1 && sp|Q1KKS9|HXD9A_TAKRU Homeobox protein Hox-D9a OS=Takifugu rubripes OX=31033 GN=hoxd9a PE=3 SV=1 && -	Homeobox
103388513	125.637	151.26	153.901	42.882	64.7165	46.2406	143.599	51.2797	1.48739	8.78e-06	0.00306179	LOC103388513	NC_024319.1	10471716	10473873	+	1885	protein_coding	chemokine-like receptor 1 && sp|B1PHQ8|CML1_PIG Chemokine-like receptor 1 OS=Sus scrofa OX=9823 GN=CMLKR1 PE=2 SV=1 && PF00001:7 transmembrane receptor (rhodopsin family)	-
103382956	18.4502	14.4919	16.5263	0	0	0	16.4895	0	6.40953	8.96e-06	0.00306666	LOC103382956	NC_024314.1	27670201	27671807	+	792	lncRNA	uncharacterized LOC103382956%2C transcript variant X2 && sp|Q1LX49|DEN11_DANRE DENN domain-containing protein 11 OS=Danio rerio OX=7955 GN=dennd11 PE=3 SV=1 && -	-
103386889	18.4502	62.4965	397.663	12.5508	11.158	9.04708	159.537	10.9186	3.86837	9.29e-06	0.00311974	LOC103386889	NC_024307.1	3885866	3893920	+	3992	protein_coding	rho GTPase-activating protein 11A && sp|Q80Y19|RHGBA_MOUSE Rho GTPase-activating protein 11A OS=Mus musculus OX=10090 GN=Arhgap11a PE=1 SV=2 && PF00620:RhoGAP domain	-
103392960	1946.93	5460.75	1311.77	536.548	342.551	852.436	2906.48	577.178	2.33204	1.16e-05	0.00381376	LOC103392960	NC_024323.1	7427596	7453403	-	4731	protein_coding	uncharacterized LOC103392960%2C transcript variant X3 && sp|P0DOX5|IGG1_HUMAN Immunoglobulin gamma-1 heavy chain OS=Homo sapiens OX=9606 PE=1 SV=2 && PF07686:Immunoglobulin V-set domain|PF07654:Immunoglobulin C1-set domain	-
103389447	65.8934	55.2505	92.9602	19.8722	16.737	19.0994	71.3681	18.5695	1.93881	1.21e-05	0.00393295	LOC103389447	NC_024320.1	8158419	8185200	+	4825	protein_coding	sodium-driven chloride bicarbonate exchanger-like%2C transcript variant X1 && sp|Q6U841|S4A10_HUMAN Sodium-driven chloride bicarbonate exchanger OS=Homo sapiens OX=9606 GN=SLC4A10 PE=1 SV=1 && PF00955:HCO3- transporter family|PF07565:Band 3 cytoplasmic domain	-
103394739	28.1145	157.6	637.294	15.6885	26.7792	29.1517	274.336	23.8732	3.52171	1.33e-05	0.00421761	LOC103394739	NC_024325.1	74650	87599	-	4355	protein_coding	chromosome-associated kinesin KIF4-like && sp|Q91784|KIF4_XENLA Chromosome-associated kinesin KIF4 OS=Xenopus laevis OX=8355 GN=kif4 PE=2 SV=1 && PF00225:Kinesin motor domain	-
103391444	27.236	86.0459	385.268	15.6885	12.2738	19.0994	166.183	15.6872	3.40221	1.4e-05	0.00439108	spdl1	NC_024321.1	19844021	19849961	+	2068	protein_coding	spindle apparatus coiled-coil protein 1 && sp|Q5BIX7|SPDLA_XENLA Protein Spindly-A OS=Xenopus laevis OX=8355 GN=spdl1-a PE=2 SV=1 && -	-
103381459	1677.21	563.374	613.537	4956.54	8536.99	1903.91	951.373	5132.48	-2.4314	1.49e-05	0.00457493	vat1	NC_024314.1	1380385	1386397	-	1404	protein_coding	vesicle amine transport 1 && sp|Q8JFV8|VAT1_DANRE Synaptic vesicle membrane protein VAT-1 homolog OS=Danio rerio OX=7955 GN=vat1 PE=2 SV=1 && PF08240:Alcohol dehydrogenase GroES-like domain|PF13602:Zinc-binding dehydrogenase	-
103384869	55.3505	194.735	915.142	42.882	41.2846	39.204	388.409	41.1236	3.23898	1.53e-05	0.00461154	LOC103384869	NC_024316.1	7866673	7872276	+	2557	protein_coding	targeting protein for Xklp2-like%2C transcript variant X1 && sp|Q6DDV8|TPX2B_XENLA Targeting protein for Xklp2-B OS=Xenopus laevis OX=8355 GN=tpx2-b PE=2 SV=1 && PF12214:Cell cycle regulated microtubule associated protein|PF06886:Targeting protein for Xklp2 (TPX2)	-
103392763	160.78	176.621	165.263	340.964	318.003	360.878	167.554	339.949	-1.0209	1.55e-05	0.00461154	LOC103392763	NC_024308.1	46999	50023	-	1381	protein_coding	vesicle transport protein SFT2B-like && sp|O95562|SFT2B_HUMAN Vesicle transport protein SFT2B OS=Homo sapiens OX=9606 GN=SFT2D2 PE=1 SV=1 && PF04178:Got1/Sft2-like family	-
103389061	1154.45	1136.71	798.425	2753.86	5601.32	1989.35	1029.86	3448.18	-1.74318	1.62e-05	0.00474307	slc27a4	NC_024320.1	1539754	1563864	+	6584	protein_coding	solute carrier family 27 member 4%2C transcript variant X2 && sp|Q6P1M0|S27A4_HUMAN Long-chain fatty acid transport protein 4 OS=Homo sapiens OX=9606 GN=SLC27A4 PE=1 SV=1 && PF00501:AMP-binding enzyme|PF13193:AMP-binding enzyme C-terminal domain	-
103383688	35.1432	144.919	688.939	16.7345	26.7792	36.1883	289.667	26.5673	3.44539	1.77e-05	0.00505306	ncapg	NC_024315.1	7557586	7565351	+	3313	protein_coding	non-SMC condensin I complex subunit G%2C transcript variant X1 && sp|Q9YHB5|CND3_XENLA Condensin complex subunit 3 OS=Xenopus laevis OX=8355 GN=ncapg PE=1 SV=1 && PF12719:Nuclear condensing complex subunits, C-term domain	-
103389450	4782.11	4233.46	1135.15	23771.3	27290.3	6564.16	3383.57	19208.6	-2.50507	1.78e-05	0.00505306	LOC103389450	NC_024320.1	8134945	8147559	+	4644	protein_coding	solute carrier family 15 member 1-like%2C transcript variant X1 && sp|P36836|S15A1_RABIT Solute carrier family 15 member 1 OS=Oryctolagus cuniculus OX=9986 GN=SLC15A1 PE=1 SV=1 && PF00854:POT family	-
103382725	2268.49	1270.76	1622.67	6210.57	8699.9	2918.18	1720.64	5942.89	-1.78815	1.84e-05	0.00513833	cd36	NC_024314.1	20139861	20145933	+	1917	protein_coding	CD36 molecule && sp|P26201|CD36_BOVIN Platelet glycoprotein 4 OS=Bos taurus OX=9913 GN=CD36 PE=1 SV=5 && PF01130:CD36 family	-
103393080	250.395	300.708	311.933	721.673	750.934	492.563	287.679	655.057	-1.18731	1.89e-05	0.00519131	fahd1	NC_024323.1	9022501	9023611	-	1111	protein_coding	fumarylacetoacetate hydrolase domain containing 1 && sp|Q2HJ98|FAHD1_BOVIN Acylpyruvase FAHD1, mitochondrial OS=Bos taurus OX=9913 GN=FAHD1 PE=2 SV=1 && PF01557:Fumarylacetoacetate (FAA) hydrolase family	-
112488408	286.417	253.609	238.598	78.4427	25.6634	97.5074	259.541	67.2045	1.9467	2.07e-05	0.00559826	LOC112488408	NC_024323.1	13960967	13962279	+	1122	protein_coding	membrane primary amine oxidase-like && sp|Q9TTK6|AOC3_BOVIN Membrane primary amine oxidase OS=Bos taurus OX=9913 GN=AOC3 PE=2 SV=3 && -	-
103395036	160.78	86.0459	91.9273	12.5508	5.579	36.1883	112.918	18.106	2.63358	2.24e-05	0.00596405	LOC103395036	NC_024308.1	5292050	5333268	+	5579	protein_coding	A disintegrin and metalloproteinase with thrombospondin motifs 10-like && sp|P58459|ATS10_MOUSE A disintegrin and metalloproteinase with thrombospondin motifs 10 OS=Mus musculus OX=10090 GN=Adamts10 PE=2 SV=3 && PF01421:Reprolysin (M12B) family zinc metalloprotease|PF01562:Reprolysin family propeptide|PF17771:ADAM cysteine-rich domain	-
103389690	348.796	545.259	446.209	195.584	214.234	156.816	446.755	188.878	1.24258	2.27e-05	0.00596405	LOC103389690	NC_024320.1	12864363	12869679	+	2099	protein_coding	cytochrome b-245 heavy chain && sp|P04839|CY24B_HUMAN Cytochrome b-245 heavy chain OS=Homo sapiens OX=9606 GN=CYBB PE=1 SV=2 && PF08022:FAD-binding domain|PF01794:Ferric reductase like transmembrane component|PF08030:Ferric reductase NAD binding domain	-
103396206	441.047	397.623	385.268	210.227	118.275	177.926	407.979	168.809	1.2723	2.31e-05	0.00597693	LOC103396206	NC_024326.1	5595172	5619791	+	4387	protein_coding	protein-glutamine gamma-glutamyltransferase K-like%2C transcript variant X4 && sp|P22758|TGM1_RABIT Protein-glutamine gamma-glutamyltransferase K OS=Oryctolagus cuniculus OX=9986 GN=TGM1 PE=2 SV=2 && PF00927:Transglutaminase family, C-terminal ig like domain|PF00868:Transglutaminase family|PF01841:Transglutaminase-like superfamily	-
103382665	3868.38	3709.03	3811.37	1678.67	977.442	1982.31	3796.26	1546.14	1.29574	2.57e-05	0.00651155	LOC103382665	NC_024314.1	19161394	19171862	+	1143	protein_coding	decorin-like && sp|Q28888|PGS2_RABIT Decorin OS=Oryctolagus cuniculus OX=9986 GN=DCN PE=2 SV=1 && PF13855:Leucine rich repeat|PF01462:Leucine rich repeat N-terminal domain	-
103393691	19.3287	63.4023	451.374	7.32132	11.158	20.1046	178.035	12.8613	3.78802	2.58e-05	0.00651155	spc24	NC_024323.1	15639001	15641582	-	1131	protein_coding	SPC24%2C NDC80 kinetochore complex component%2C transcript variant X1 && sp|Q8NBT2|SPC24_HUMAN Kinetochore protein Spc24 OS=Homo sapiens OX=9606 GN=SPC24 PE=1 SV=2 && PF08286:Spc24 subunit of Ndc80	-
103388356	1043.75	1134.9	892.418	4221.27	3409.89	1558.11	1023.69	3063.09	-1.58109	2.79e-05	0.00694077	LOC103388356	NC_024319.1	7352425	7359297	-	3657	protein_coding	nuclear receptor subfamily 1 group D member 2 && sp|Q60674|NR1D2_MOUSE Nuclear receptor subfamily 1 group D member 2 OS=Mus musculus OX=10090 GN=Nr1d2 PE=1 SV=1 && PF00105:Zinc finger, C4 type (two domains)|PF00104:Ligand-binding domain of nuclear hormone receptor	THR-like
103382585	1783.52	1093.24	772.603	6442.76	9829.09	1711.91	1216.45	5994.59	-2.30085	2.95e-05	0.00704461	lta4h	NC_024314.1	18504632	18510311	+	2190	protein_coding	leukotriene A4 hydrolase && sp|P09960|LKHA4_HUMAN Leukotriene A-4 hydrolase OS=Homo sapiens OX=9606 GN=LTA4H PE=1 SV=2 && PF17900:Peptidase M1 N-terminal domain|PF09127:Leukotriene A4 hydrolase, C-terminal|PF01433:Peptidase family M1 domain	-
103396530	1458.44	1159.36	1754.88	703.893	625.964	753.923	1457.56	694.593	1.06898	2.96e-05	0.00704461	piezo2	NC_024326.1	10878304	10930951	-	11367	protein_coding	piezo type mechanosensitive ion channel component 2%2C transcript variant X7 && sp|Q8CD54|PIEZ2_MOUSE Piezo-type mechanosensitive ion channel component 2 OS=Mus musculus OX=10090 GN=Piezo2 PE=1 SV=2 && PF12166:Piezo non-specific cation channel, R-Ras-binding domain|PF15917:Piezo	-
103394936	951.501	447.439	447.242	4246.37	5224.18	761.965	615.394	3410.84	-2.47035	2.97e-05	0.00704461	faxdc2	NC_024325.1	4414360	4420574	+	2393	protein_coding	fatty acid hydroxylase domain containing 2 && sp|Q9GKT2|FXDC2_MACFA Fatty acid hydroxylase domain-containing protein 2 OS=Macaca fascicularis OX=9541 GN=FAXDC2 PE=2 SV=1 && PF04116:Fatty acid hydroxylase superfamily	-
103388396	65.0149	23.5494	25.8223	328.414	330.277	61.3191	38.1289	240.003	-2.65119	3.04e-05	0.00704461	LOC103388396	NC_024319.1	8566894	8575118	+	2496	protein_coding	metalloreductase STEAP4-like && sp|Q687X5|STEA4_HUMAN Metalloreductase STEAP4 OS=Homo sapiens OX=9606 GN=STEAP4 PE=1 SV=1 && PF01794:Ferric reductase like transmembrane component|PF03807:NADP oxidoreductase coenzyme F420-dependent	-
103379882	68.5292	31.7011	32.0196	305.404	416.194	65.34	44.0833	262.312	-2.57057	3.07e-05	0.00704461	slc13a1	NC_024312.1	6261512	6268065	+	2246	protein_coding	solute carrier family 13 member 1 && sp|Q07782|S13A1_RAT Solute carrier family 13 member 1 OS=Rattus norvegicus OX=10116 GN=Slc13a1 PE=2 SV=1 && PF00939:Sodium:sulfate symporter transmembrane region	-
103380804	25.4788	32.6069	18.592	1313.65	37.9372	849.42	25.5592	733.671	-4.84261	3.07e-05	0.00704461	LOC103380804	NC_024313.1	4417265	4419657	-	1816	protein_coding	proto-oncogene c-Fos-like && sp|P53450|FOS_TAKRU Proto-oncogene c-Fos OS=Takifugu rubripes OX=31033 GN=fos PE=3 SV=1 && PF00170:bZIP transcription factor	TF_bZIP
103386609	21.0859	107.784	527.807	13.5967	20.0844	24.1255	218.892	19.2689	3.5046	3.12e-05	0.00707254	nuf2	NC_024317.1	16505914	16510674	+	1605	protein_coding	NUF2%2C NDC80 kinetochore complex component && sp|Q7ZW63|NUF2_DANRE Kinetochore protein Nuf2 OS=Danio rerio OX=7955 GN=nuf2 PE=2 SV=1 && PF18595:Designed helical repeat protein 10 domain|PF03800:Nuf2 family	-
103380616	26.3574	155.788	713.728	20.9181	27.895	34.1778	298.625	27.6636	3.43127	3.2e-05	0.00717149	LOC103380616	NC_024313.1	345422	370643	+	7524	protein_coding	centromere-associated protein E-like && sp|Q02224|CENPE_HUMAN Centromere-associated protein E OS=Homo sapiens OX=9606 GN=CENPE PE=1 SV=2 && PF00225:Kinesin motor domain	-
103394210	729.221	992.698	545.367	376.525	222.044	245.276	755.762	281.282	1.42599	3.27e-05	0.00722514	col16a1	NC_024324.1	7314941	7373890	-	6305	protein_coding	collagen type XVI alpha 1 chain%2C transcript variant X2 && sp|Q8BLX7|COGA1_MOUSE Collagen alpha-1(XVI) chain OS=Mus musculus OX=10090 GN=Col16a1 PE=1 SV=2 && PF01391:Collagen triple helix repeat (20 copies)	-
112487585	0	0	1.03289	3.13771	32.3582	50.2615	0.344297	28.5858	-6.4129	3.37e-05	0.00737142	LOC112487585	NC_024316.1	14129924	14132606	-	741	lncRNA	uncharacterized LOC112487585 && - && -	-
103377367	224.916	64.308	172.493	492.62	1277.59	412.145	153.906	727.452	-2.24062	3.49e-05	0.00754401	LOC103377367	NC_024309.1	12373635	12380319	-	1667	protein_coding	ADP-ribosyl cyclase/cyclic ADP-ribose hydrolase 1-like && sp|P28907|CD38_HUMAN ADP-ribosyl cyclase/cyclic ADP-ribose hydrolase 1 OS=Homo sapiens OX=9606 GN=CD38 PE=1 SV=2 && PF02267:ADP-ribosyl cyclase	-
103393061	27.236	108.69	530.906	20.9181	26.7792	19.0994	222.277	22.2656	3.31938	3.55e-05	0.00758057	ccnf	NC_024323.1	9211766	9219827	-	3729	protein_coding	cyclin F && sp|Q6NYX6|CCNF_DANRE Cyclin-F OS=Danio rerio OX=7955 GN=ccnf PE=2 SV=1 && PF02984:Cyclin, C-terminal domain|PF12937:F-box-like|PF00134:Cyclin, N-terminal domain	-
103383188	4154.8	19339.5	5020.88	2905.52	720.807	813.232	9505.06	1479.85	2.68323	3.73e-05	0.00785806	cfd	NC_024307.1	18190475	18193375	+	1104	protein_coding	complement factor D && sp|Q63ZK0|AMI_XENLA Serine protease ami OS=Xenopus laevis OX=8355 GN=ami PE=2 SV=1 && PF00089:Trypsin	-
103381911	838.165	487.292	844.905	1628.47	1847.77	1539.01	723.454	1671.75	-1.20852	3.84e-05	0.00801608	LOC103381911	NC_024314.1	8585286	8650752	-	5067	protein_coding	calcium-activated potassium channel subunit alpha-1%2C transcript variant X2 && sp|Q12791|KCMA1_HUMAN Calcium-activated potassium channel subunit alpha-1 OS=Homo sapiens OX=9606 GN=KCNMA1 PE=1 SV=2 && PF00520:Ion transport protein|PF03493:Calcium-activated BK potassium channel alpha subunit	-
103386748	109.822	69.7425	126.013	39.7443	13.3896	13.068	101.859	22.0673	2.2049	4.11e-05	0.00847035	gpd1	NC_024317.1	19137115	19143747	+	1875	protein_coding	glycerol-3-phosphate dehydrogenase 1 && sp|O57656|GPDA_TAKRU Glycerol-3-phosphate dehydrogenase [NAD(+)], cytoplasmic OS=Takifugu rubripes OX=31033 GN=gpd1 PE=3 SV=1 && PF01210:NAD-dependent glycerol-3-phosphate dehydrogenase N-terminus|PF07479:NAD-dependent glycerol-3-phosphate dehydrogenase C-terminus	-
103386221	37.7789	180.244	654.853	28.2394	37.9372	37.1935	290.959	34.4567	3.07731	4.17e-05	0.00850175	cit	NC_024317.1	8606153	8637228	-	8978	protein_coding	citron rho-interacting serine/threonine kinase%2C transcript variant X1 && sp|O14578|CTRO_HUMAN Citron Rho-interacting kinase OS=Homo sapiens OX=9606 GN=CIT PE=1 SV=2 && PF00069:Protein kinase domain|PF00780:CNH domain|PF00169:PH domain	-
103389327	21.9645	10.869	7.23024	112.958	338.088	13.068	13.3546	154.704	-3.52863	4.53e-05	0.00891152	LOC103389327	NC_024307.1	28412361	28419632	-	2424	protein_coding	sodium/hydrogen exchanger 9B2-like%2C transcript variant X1 && sp|Q86UD5|SL9B2_HUMAN Sodium/hydrogen exchanger 9B2 OS=Homo sapiens OX=9606 GN=SLC9B2 PE=1 SV=2 && PF00999:Sodium/hydrogen exchanger family	-
103382721	256.545	230.965	180.756	108.774	43.5162	63.3295	222.755	71.8732	1.63123	4.56e-05	0.00891152	magi2	NC_024314.1	19906696	20089122	-	7059	protein_coding	membrane associated guanylate kinase%2C WW and PDZ domain containing 2%2C transcript variant X1 && sp|Q86UL8|MAGI2_HUMAN Membrane-associated guanylate kinase, WW and PDZ domain-containing protein 2 OS=Homo sapiens OX=9606 GN=MAGI2 PE=1 SV=3 && PF16663:Unstructured region on MAGI|PF00397:WW domain|PF17820:PDZ domain|PF00625:Guanylate kinase|PF00595:PDZ domain	-
103380908	125111	58023.9	39981.2	324520	364941	153896	74372.2	281119	-1.91834	4.58e-05	0.00891152	LOC103380908	NC_024313.1	6034077	6048760	-	9804	protein_coding	apolipoprotein B-100-like && sp|P04114|APOB_HUMAN Apolipoprotein B-100 OS=Homo sapiens OX=9606 GN=APOB PE=1 SV=2 && PF06448:Domain of Unknown Function (DUF1081)|PF09172:Domain of unknown function (DUF1943)|PF01347:Lipoprotein amino terminal region	-
103383254	24.6002	15.3977	11.3618	80.5345	51.3268	68.3557	17.1199	66.739	-1.95555	4.59e-05	0.00891152	LOC103383254	NC_024315.1	1230807	1236533	-	3363	protein_coding	ubinuclein-1-like%2C transcript variant X1 && sp|Q4G0F8|UBN1_MOUSE Ubinuclein-1 OS=Mus musculus OX=10090 GN=Ubn1 PE=2 SV=1 && PF14075:Ubinuclein conserved middle domain|PF08729:HPC2 and ubinuclein domain	-
112488382	1.75716	3.62299	1.03289	21.964	66.9481	11.0575	2.13768	33.3232	-3.94465	4.62e-05	0.00891152	LOC112488382	NC_024308.1	14084469	14111333	-	2633	lncRNA	uncharacterized LOC112488382%2C transcript variant X1 && - && -	-
novel.56	21.0859	10.869	20.6578	418.361	24.5476	80.4185	17.5376	174.442	-3.31539	4.72e-05	0.00901146	-	NC_024307.1	28784901	28786526	-	402	-	- && - && -	-
novel.568	3.51432	0.905746	0	79.4886	26.7792	7.03661	1.47335	37.7682	-4.63863	4.93e-05	0.00930823	-	NC_024323.1	14552536	14553951	+	1332	-	- && - && -	-
103393329	0.878579	0	2.06578	48.1115	12.2738	16.0837	0.981454	25.4897	-4.74806	4.98e-05	0.00930885	lhx4	NC_024308.1	1548382	1556653	+	1999	protein_coding	LIM homeobox 4 && sp|P53776|LHX4_MOUSE LIM/homeobox protein Lhx4 OS=Mus musculus OX=10090 GN=Lhx4 PE=1 SV=4 && PF00046:Homeodomain|PF00412:LIM domain	Homeobox
103380120	368.125	522.616	312.966	137.013	46.8636	153.8	401.235	112.559	1.83241	5.12e-05	0.00947288	LOC103380120	NC_024312.1	10568848	10590706	+	4249	protein_coding	prickle-like protein 1 && sp|Q96MT3|PRIC1_HUMAN Prickle-like protein 1 OS=Homo sapiens OX=9606 GN=PRICKLE1 PE=1 SV=2 && PF00412:LIM domain|PF06297:PET Domain	-
103389597	117.73	1224.57	250.993	54.387	70.2955	102.534	531.097	75.7387	2.80964	5.42e-05	0.00985546	LOC103389597	NC_024320.1	11400883	11427401	-	533	protein_coding	V-set pre-B cell surrogate light chain 3 && sp|P01683|KV02_RABIT Ig kappa chain V region 3315 OS=Oryctolagus cuniculus OX=9986 PE=1 SV=1 && PF07686:Immunoglobulin V-set domain	-
103388771	240.731	126.805	52.6775	461.243	875.904	456.375	140.071	597.841	-2.0917	5.43e-05	0.00985546	LOC103388771	NC_024319.1	16315000	16322383	+	2662	protein_coding	sialoadhesin-like%2C transcript variant X1 && sp|P35329|CD22_MOUSE B-cell receptor CD22 OS=Mus musculus OX=10090 GN=Cd22 PE=1 SV=1 && PF07686:Immunoglobulin V-set domain|PF13895:Immunoglobulin domain	-
103381422	10.543	37.1356	280.946	9.41313	7.81061	6.03138	109.542	7.75171	3.81997	5.5e-05	0.00988051	cep55	NC_024314.1	670761	682016	-	3586	protein_coding	centrosomal protein 55%2C transcript variant X1 && sp|Q502I3|CEP55_DANRE Centrosomal protein of 55 kDa OS=Danio rerio OX=7955 GN=cep55 PE=2 SV=1 && PF12180:TSG101 and ALIX binding domain of CEP55	-
103378988	1337.2	1519.84	885.188	616.037	548.974	539.809	1247.41	568.273	1.13454	5.9e-05	0.0104932	mmp2	NC_024311.1	9491033	9500893	+	3184	protein_coding	matrix metallopeptidase 2 && sp|P08253|MMP2_HUMAN 72 kDa type IV collagenase OS=Homo sapiens OX=9606 GN=MMP2 PE=1 SV=2 && PF00040:Fibronectin type II domain|PF00413:Matrixin|PF00045:Hemopexin|PF01471:Putative peptidoglycan binding domain	-
103380588	3.51432	0	2.06578	13.5967	36.8214	29.1517	1.86003	26.5233	-3.8294	5.99e-05	0.0105068	LOC103380588	NC_024312.1	18829923	18839435	+	2060	lncRNA	uncharacterized LOC103380588%2C transcript variant X3 && sp|Q8HYW2|SO3A1_BOVIN Solute carrier organic anion transporter family member 3A1 OS=Bos taurus OX=9913 GN=SLCO3A1 PE=2 SV=1 && PF03137:Organic Anion Transporter Polypeptide (OATP) family	-
103388675	28.9931	100.538	562.926	14.6426	16.737	36.1883	230.819	22.5227	3.35468	6.05e-05	0.0105068	ttk	NC_024319.1	13992784	13999628	+	3515	protein_coding	TTK protein kinase && sp|Q8AYG3|TTK_DANRE Dual specificity protein kinase Ttk OS=Danio rerio OX=7955 GN=ttk PE=1 SV=2 && PF00069:Protein kinase domain	-
103398285	7.02863	26.2666	223.105	3.13771	5.579	6.03138	85.4666	4.91603	4.11782	6.08e-05	0.0105068	cenph	NC_024328.1	20114428	20116725	+	1286	protein_coding	centromere protein H%2C transcript variant X1 && - && PF05837:Centromere protein H (CENP-H)	-
103383196	144.087	133.145	168.361	905.752	145.054	1350.02	148.531	800.277	-2.43015	6.18e-05	0.010523	ier2	NC_024315.1	423855	424806	+	817	protein_coding	immediate early response 2 && sp|B7SXM5|IER2_DANRE Immediate early response gene 2 protein OS=Danio rerio OX=7955 GN=ier2 PE=1 SV=1 && PF05760:Immediate early response protein (IER)	-
103387030	20.2073	101.444	452.406	19.8722	6.69481	25.1308	191.352	17.2326	3.46905	6.21e-05	0.010523	LOC103387030	NC_024307.1	25282071	25321750	+	6785	protein_coding	regulator of G protein signaling 12 && sp|O14924|RGS12_HUMAN Regulator of G-protein signaling 12 OS=Homo sapiens OX=9606 GN=RGS12 PE=1 SV=1 && PF00615:Regulator of G protein signaling domain|PF00595:PDZ domain|PF02196:Raf-like Ras-binding domain|PF02188:GoLoco motif|PF16613:Unstructured region of RGS12|PF16612:C-terminal unstructured region of RGS12	-
103390609	15.8144	86.9517	504.051	12.5508	20.0844	20.1046	202.272	17.58	3.52352	6.54e-05	0.0109806	LOC103390609	NC_024321.1	2902919	2905763	-	1420	protein_coding	aurora kinase B-like && sp|Q6NW76|AURKB_DANRE Aurora kinase B OS=Danio rerio OX=7955 GN=aurkb PE=2 SV=1 && PF00069:Protein kinase domain	-
103396843	69.4078	51.6275	64.0393	465.427	127.201	162.847	61.6915	251.825	-2.02955	6.63e-05	0.0110329	LOC103396843	NC_024326.1	14891398	14896988	-	2089	protein_coding	S-arrestin-like%2C transcript variant X4 && sp|P51477|ARRS_XENLA S-arrestin OS=Xenopus laevis OX=8355 GN=sag PE=2 SV=1 && PF02752:Arrestin (or S-antigen), C-terminal domain|PF00339:Arrestin (or S-antigen), N-terminal domain	-
103380131	1065.72	733.655	418.321	1715.28	3122.01	1855.66	739.231	2230.98	-1.59314	7.2e-05	0.0118774	LOC103380131	NC_024312.1	11200723	11207856	-	3096	protein_coding	choline/ethanolamine kinase && sp|P35790|CHKA_HUMAN Choline kinase alpha OS=Homo sapiens OX=9606 GN=CHKA PE=1 SV=3 && PF01633:Choline/ethanolamine kinase	-
103378702	30.7503	94.1976	342.92	21.964	11.158	26.136	155.956	19.7527	2.97715	7.31e-05	0.0119051	kif18a	NC_024311.1	3996947	4018587	+	3469	protein_coding	kinesin family member 18A%2C transcript variant X1 && sp|Q8NI77|KI18A_HUMAN Kinesin-like protein KIF18A OS=Homo sapiens OX=9606 GN=KIF18A PE=1 SV=2 && PF00225:Kinesin motor domain	-
103384877	12.3001	93.2919	347.052	5.22952	3.3474	23.1203	150.881	10.5657	3.82893	7.41e-05	0.0119051	LOC103384877	NC_024316.1	7811056	7816837	-	2741	protein_coding	targeting protein for Xklp2-like && sp|A4IH24|TPX2_XENTR Targeting protein for Xklp2 OS=Xenopus tropicalis OX=8364 GN=tpx2 PE=2 SV=1 && PF12214:Cell cycle regulated microtubule associated protein|PF06886:Targeting protein for Xklp2 (TPX2)	-
103383768	100.158	97.8206	104.322	326.322	410.615	156.816	100.767	297.918	-1.56341	7.42e-05	0.0119051	LOC103383768	NC_024315.1	9456585	9462926	+	3048	protein_coding	mitochondrial glycine transporter B-like%2C transcript variant X1 && sp|P0CAT2|S238B_DANRE Mitochondrial glycine transporter B OS=Danio rerio OX=7955 GN=slc25a38b PE=2 SV=2 && PF00153:Mitochondrial carrier protein	-
103385939	233.702	155.788	143.572	48.1115	2.2316	29.1517	177.687	26.4983	2.74226	7.51e-05	0.0119563	LOC103385939	NC_024317.1	3780537	3782413	+	1441	protein_coding	vasopressin V2 receptor-like && sp|O88721|V2R_MOUSE Vasopressin V2 receptor OS=Mus musculus OX=10090 GN=Avpr2 PE=2 SV=1 && PF00001:7 transmembrane receptor (rhodopsin family)	-
103387665	50.079	154.883	833.543	41.8361	39.053	47.2458	346.168	42.7117	3.01781	7.6e-05	0.011985	kif11	NC_024318.1	14370563	14380818	-	3600	protein_coding	kinesin family member 11 && sp|B2GU58|KIF11_XENTR Kinesin-like protein KIF11 OS=Xenopus tropicalis OX=8364 GN=kif11 PE=2 SV=1 && PF13931:Kinesin-associated microtubule-binding|PF00225:Kinesin motor domain	-
103382547	116.851	223.719	137.375	66.9378	32.3582	50.2615	159.315	49.8525	1.67466	7.75e-05	0.0120509	lin7a	NC_024314.1	17430349	17465113	+	4447	protein_coding	lin-7 homolog A%2C crumbs cell polarity complex component && sp|Q32LM6|LIN7A_BOVIN Protein lin-7 homolog A OS=Bos taurus OX=9913 GN=LIN7A PE=2 SV=1 && -	-
103391152	50.9576	48.0046	29.9538	419.407	216.465	57.2981	42.972	231.057	-2.42484	7.83e-05	0.0120509	LOC103391152	NC_024321.1	14440708	14447789	-	6247	protein_coding	protocadherin-20-like && sp|Q8BIZ0|PCD20_MOUSE Protocadherin-20 OS=Mus musculus OX=10090 GN=Pcdh20 PE=2 SV=3 && PF00028:Cadherin domain	-
103388520	205.588	214.662	128.079	75.305	64.7165	77.4028	182.776	72.4747	1.33515	7.84e-05	0.0120509	LOC103388520	NC_024319.1	10441600	10444265	+	1550	protein_coding	urokinase plasminogen activator surface receptor && - && -	-
103397494	21.0859	40.7586	42.3485	98.3149	325.814	84.4394	34.731	169.523	-2.28826	7.94e-05	0.0120773	LOC103397494	NC_024328.1	2063650	2071442	+	2829	protein_coding	sushi domain-containing protein 1%2C transcript variant X1 && sp|Q6UWL2|SUSD1_HUMAN Sushi domain-containing protein 1 OS=Homo sapiens OX=9606 GN=SUSD1 PE=1 SV=1 && PF00084:Sushi repeat (SCR repeat)|PF12662:Complement Clr-like EGF-like	-
103380195	59.7434	154.883	775.701	36.6066	46.8636	51.2668	330.109	44.9123	2.87693	8.15e-05	0.0121149	LOC103380195	NC_024312.1	12066824	12073499	+	2395	protein_coding	protein regulator of cytokinesis 1-like && sp|O43663|PRC1_HUMAN Protein regulator of cytokinesis 1 OS=Homo sapiens OX=9606 GN=PRC1 PE=1 SV=2 && PF03999:Microtubule associated protein (MAP65/ASE1 family)	-
103383810	15.8144	7.24597	7.23024	61.7083	68.0639	28.1465	10.0969	52.6395	-2.37254	8.41e-05	0.0123944	prss12	NC_024315.1	9813515	9831811	-	5435	protein_coding	serine protease 12 && sp|Q5G268|NETR_NOMLE Neurotrypsin OS=Nomascus leucogenys OX=61853 GN=PRSS12 PE=3 SV=1 && PF00051:Kringle domain|PF00530:Scavenger receptor cysteine-rich domain|PF00089:Trypsin	-
103380192	1306.45	880.386	1070.08	421.499	429.583	627.264	1085.64	492.782	1.13925	8.59e-05	0.0124587	LOC103380192	NC_024312.1	12054357	12058214	+	3858	protein_coding	fin bud initiation factor-like && sp|A1IGX5|FIBIN_DANRE Fin bud initiation factor OS=Danio rerio OX=7955 GN=fibin PE=2 SV=1 && PF15819:Fin bud initiation factor homologue	-
103390008	141.451	277.158	193.151	50.2034	33.474	92.4812	203.92	58.7195	1.79329	8.72e-05	0.0125144	dmgdh	NC_024320.1	18970130	18986302	+	3116	protein_coding	dimethylglycine dehydrogenase && sp|Q63342|M2GD_RAT Dimethylglycine dehydrogenase, mitochondrial OS=Rattus norvegicus OX=10116 GN=Dmgdh PE=1 SV=1 && PF16350:FAD dependent oxidoreductase central domain|PF01571:Aminomethyltransferase folate-binding domain|PF01266:FAD dependent oxidoreductase|PF08669:Glycine cleavage T-protein C-terminal barrel domain	-
103398039	1159.72	952.845	664.149	4527.71	3126.47	1375.16	925.573	3009.78	-1.70105	8.76e-05	0.0125144	LOC103398039	NC_024328.1	14758363	14770393	+	4760	protein_coding	NPC1-like intracellular cholesterol transporter 1 && sp|Q9UHC9|NPCL1_HUMAN NPC1-like intracellular cholesterol transporter 1 OS=Homo sapiens OX=9606 GN=NPC1L1 PE=1 SV=2 && PF16414:Niemann-Pick C1 N terminus|PF02460:Patched family|PF12349:Sterol-sensing domain of SREBP cleavage-activation	-
103379529	8.78579	45.2873	204.512	3.13771	8.92641	8.04185	86.1952	6.70199	3.68446	8.88e-05	0.0125791	gtse1	NC_024312.1	1653035	1658717	-	2901	protein_coding	G2 and S-phase expressed 1%2C transcript variant X1 && - && PF15259:G-2 and S-phase expressed 1	-
103385122	32.5074	78.7999	34.0854	2.09181	6.69481	12.0628	48.4643	6.94979	2.79757	9.02e-05	0.012598	hoxc9	NC_024316.1	13315659	13319667	-	2972	protein_coding	homeobox C9 && sp|Q9PVQ9|HXC9_ORYLA Homeobox protein Hox-C9 OS=Oryzias latipes OX=8090 GN=hoxc9 PE=2 SV=1 && PF00046:Homeodomain|PF04617:Hox9 activation region	Homeobox
103381841	1316.99	829.664	654.853	2814.53	5324.6	1575.2	933.836	3238.11	-1.79368	9.03e-05	0.012598	LOC103381841	NC_024314.1	7976102	7980495	-	2353	protein_coding	ectonucleotide pyrophosphatase/phosphodiesterase family member 7-like && sp|Q6UWV6|ENPP7_HUMAN Ectonucleotide pyrophosphatase/phosphodiesterase family member 7 OS=Homo sapiens OX=9606 GN=ENPP7 PE=1 SV=3 && PF01663:Type I phosphodiesterase / nucleotide pyrophosphatase	-
103398441	215.252	255.421	232.401	479.024	542.279	389.024	234.358	470.109	-1.00394	9.13e-05	0.0126154	gramd2a	NW_007585111.1	357135	380530	-	4569	protein_coding	GRAM domain containing 2A && sp|Q3V3G7|GRM2A_MOUSE GRAM domain-containing protein 2A OS=Mus musculus OX=10090 GN=Gramd2a PE=2 SV=1 && PF02893:GRAM domain	-
103394035	456.861	479.14	1096.93	3612.55	1810.94	1534.99	677.644	2319.49	-1.77563	9.18e-05	0.0126154	LOC103394035	NC_024324.1	3289521	3303534	-	4081	protein_coding	PR domain zinc finger protein 1-like && sp|O75626|PRDM1_HUMAN PR domain zinc finger protein 1 OS=Homo sapiens OX=9606 GN=PRDM1 PE=1 SV=2 && -	zf-C2H2
103383691	8.78579	49.8161	270.618	5.22952	4.4632	14.0732	109.74	7.92198	3.78548	9.27e-05	0.0126408	haspin	NC_024315.1	7524837	7532391	+	4348	protein_coding	histone H3 associated protein kinase && sp|Q2KIP2|HASP_BOVIN Serine/threonine-protein kinase haspin OS=Bos taurus OX=9913 GN=HASPIN PE=2 SV=1 && PF12330:Haspin like kinase domain	-
103380282	33.386	128.616	617.669	32.423	31.2424	31.1622	259.89	31.6092	3.0386	9.46e-05	0.0128077	incenp	NC_024312.1	13142345	13151286	+	3041	protein_coding	inner centromere protein && sp|Q0IHP2|INCE_XENTR Inner centromere protein OS=Xenopus tropicalis OX=8364 GN=incenp PE=2 SV=1 && PF12178:Chromosome passenger complex (CPC) protein INCENP N terminal|PF03941:Inner centromere protein, ARK binding region	-
103395978	218.766	172.092	470.998	88.9018	79.2219	101.528	287.286	89.884	1.67468	9.57e-05	0.0128603	LOC103395978	NC_024326.1	2531622	2539585	-	3073	protein_coding	G protein signaling modulator 2%2C transcript variant X1 && sp|Q8VDU0|GPSM2_MOUSE G-protein-signaling modulator 2 OS=Mus musculus OX=10090 GN=Gpsm2 PE=1 SV=2 && PF13424:Tetratricopeptide repeat|PF02188:GoLoco motif	-
103390465	714.285	752.675	321.229	260.43	90.3799	160.837	596.063	170.549	1.80507	9.75e-05	0.0130045	LOC103390465	NC_024320.1	28559862	28576152	-	2671	protein_coding	anthrax toxin receptor 1-like && sp|Q0PMD2|ANTR1_RAT Anthrax toxin receptor 1 OS=Rattus norvegicus OX=10116 GN=Antxr1 PE=1 SV=2 && PF00092:von Willebrand factor type A domain|PF05586:Anthrax receptor C-terminus region|PF05587:Anthrax receptor extracellular domain	-
103382680	124.758	95.1034	108.454	18.8263	32.3582	50.2615	109.438	33.8153	1.69235	0.000107703	0.0140971	LOC103382680	NC_024314.1	19134023	19147560	+	941	protein_coding	decorin-like && sp|Q29393|PGS2_CANLF Decorin OS=Canis lupus familiaris OX=9615 GN=DCN PE=2 SV=2 && PF01462:Leucine rich repeat N-terminal domain	-
103398461	7.02863	44.3816	371.841	11.5049	10.0422	8.04185	141.084	9.863	3.83773	0.000108033	0.0140971	prc1	NW_007585112.1	129172	135532	-	2847	protein_coding	protein regulator of cytokinesis 1%2C transcript variant X1 && sp|O43663|PRC1_HUMAN Protein regulator of cytokinesis 1 OS=Homo sapiens OX=9606 GN=PRC1 PE=1 SV=2 && PF03999:Microtubule associated protein (MAP65/ASE1 family)	-
103395590	135.301	212.85	184.888	1119.12	729.734	229.193	177.68	692.681	-1.96296	0.000110574	0.0143256	LOC103395590	NC_024325.1	16220799	16229085	-	3961	protein_coding	solute carrier family 23 member 1%2C transcript variant X1 && sp|Q9WTW7|S23A1_RAT Solute carrier family 23 member 1 OS=Rattus norvegicus OX=10116 GN=Slc23a1 PE=2 SV=1 && PF00860:Permease family	-
103391114	1313.48	820.606	1625.77	4309.12	2305.24	3064.95	1253.28	3226.44	-1.36441	0.000121755	0.0156374	dusp1	NC_024321.1	13680476	13683703	-	2209	protein_coding	dual specificity phosphatase 1 && sp|P28562|DUS1_HUMAN Dual specificity protein phosphatase 1 OS=Homo sapiens OX=9606 GN=DUSP1 PE=1 SV=3 && PF00581:Rhodanese-like domain|PF00782:Dual specificity phosphatase, catalytic domain	-
103391853	23.7216	9.05746	7.23024	55.4329	127.201	41.2145	13.3364	74.6162	-2.47389	0.000124746	0.0158227	ola1	NC_024322.1	6241786	6288002	-	3178	protein_coding	Obg like ATPase 1%2C transcript variant X2 && sp|Q7ZU42|OLA1_DANRE Obg-like ATPase 1 OS=Danio rerio OX=7955 GN=ola1 PE=2 SV=1 && PF06071:Protein of unknown function (DUF933)|PF01926:50S ribosome-binding GTPase	-
103388563	59.7434	40.7586	59.9077	135.967	299.035	109.57	53.4699	181.524	-1.76293	0.000125716	0.015835	LOC103388563	NC_024307.1	26652202	26654578	-	1264	protein_coding	interleukin-8-like && sp|P50228|CXCL5_MOUSE C-X-C motif chemokine 5 OS=Mus musculus OX=10090 GN=Cxcl5 PE=1 SV=2 && PF00048:Small cytokines (intecrine/chemokine), interleukin-8 like	-
103387576	1153.57	968.243	319.163	3198.37	3300.54	1845.6	813.66	2781.5	-1.773	0.000128362	0.0159389	oit3	NC_024318.1	12764447	12776564	+	3590	protein_coding	oncoprotein induced transcript 3%2C transcript variant X2 && sp|Q8WWZ8|OIT3_HUMAN Oncoprotein-induced transcript 3 protein OS=Homo sapiens OX=9606 GN=OIT3 PE=1 SV=2 && PF00100:Zona pellucida-like domain|PF14670:Coagulation Factor Xa inhibitory site	-
103399603	3052.18	1270.76	1419.19	5181.4	8457.77	4015.9	1914.05	5885.02	-1.6203	0.000129272	0.0159389	LOC103399603	NW_007591031.1	1	551	-	374	lncRNA	uncharacterized LOC103399603 && - && -	-
103384487	46.5647	41.6643	52.6775	418.361	46.8636	282.47	46.9688	249.232	-2.40869	0.00012954	0.0159389	LOC103384487	NC_024316.1	1777087	1786805	-	2874	protein_coding	ERBB receptor feedback inhibitor 1-like && sp|Q99JZ7|ERRFI_MOUSE ERBB receptor feedback inhibitor 1 OS=Mus musculus OX=10090 GN=Errfi1 PE=1 SV=1 && PF11555:EGFR receptor inhibitor Mig-6	-
103380193	549.112	526.239	481.327	225.915	207.539	319.663	518.893	251.039	1.04691	0.000130056	0.0159389	LOC103380193	NC_024312.1	12058511	12061919	-	2723	protein_coding	transmembrane protein 178B-like && sp|F6V1J6|T178B_XENTR Transmembrane protein 178B OS=Xenopus tropicalis OX=8364 GN=tmem178b PE=2 SV=2 && PF13903:PMP-22/EMP/MP20/Claudin tight junction	-
103383337	655.42	745.429	527.807	1405.69	1421.53	1045.44	642.886	1290.89	-1.00527	0.00013217	0.0159874	tbc1d9	NC_024315.1	2104773	2121705	-	5902	protein_coding	TBC1 domain family member 9 && sp|Q6ZT07|TBCD9_HUMAN TBC1 domain family member 9 OS=Homo sapiens OX=9606 GN=TBC1D9 PE=2 SV=2 && PF00566:Rab-GTPase-TBC domain|PF02893:GRAM domain	-
103397874	23.7216	91.4804	529.873	15.6885	30.1266	24.1255	215.025	23.3136	3.20503	0.000132214	0.0159874	ckap2l	NC_024328.1	10335047	10351103	+	2412	protein_coding	cytoskeleton associated protein 2 like && sp|Q8IYA6|CKP2L_HUMAN Cytoskeleton-associated protein 2-like OS=Homo sapiens OX=9606 GN=CKAP2L PE=1 SV=4 && PF15297:Cytoskeleton-associated protein 2 C-terminus	-
103377344	21.9645	124.087	477.196	14.6426	12.2738	39.204	207.749	22.0402	3.23322	0.000135596	0.0161636	kif15	NC_024307.1	6718646	6729156	+	4969	protein_coding	kinesin family member 15 && sp|Q91785|KI15A_XENLA Kinesin-like protein KIF15-A OS=Xenopus laevis OX=8355 GN=kif15-a PE=1 SV=1 && PF15908:Hyaluronan mediated motility receptor C-terminal|PF00225:Kinesin motor domain	-
103382244	92.2508	4.52873	3.09867	8190.47	13692	12.0628	33.2927	7298.17	-7.77538	0.000136346	0.0161636	asah2	NC_024314.1	14461469	14471276	+	3529	protein_coding	N-acylsphingosine amidohydrolase 2%2C transcript variant X1 && sp|Q5W7F1|ASAH2_DANRE Neutral ceramidase OS=Danio rerio OX=7955 GN=asah2 PE=1 SV=1 && PF04734:Neutral/alkaline non-lysosomal ceramidase, N-terminal|PF17048:Neutral/alkaline non-lysosomal ceramidase, C-terminal	-
103385982	3.51432	3.62299	0	14.6426	37.9372	26.136	2.3791	26.2386	-3.42657	0.000138789	0.0163465	LOC103385982	NC_024317.1	4186021	4188765	+	1438	protein_coding	photoreceptor ankyrin repeat protein-like && sp|Q7Z3H0|PANKY_HUMAN Photoreceptor ankyrin repeat protein OS=Homo sapiens OX=9606 GN=ANKRD33 PE=1 SV=4 && PF12796:Ankyrin repeats (3 copies)	-
103382450	65.8934	179.338	53.7104	5.22952	6.69481	31.1622	99.6472	14.3622	2.78851	0.000148903	0.0171141	proser2	NC_024314.1	16182786	16190229	-	4954	protein_coding	proline and serine rich 2 && sp|Q86WR7|PRSR2_HUMAN Proline and serine-rich protein 2 OS=Homo sapiens OX=9606 GN=PROSER2 PE=1 SV=2 && PF15385:Specifically androgen-regulated gene protein	-
103385047	66.772	37.1356	28.921	766.647	146.17	58.3034	44.2762	323.707	-2.86861	0.000149043	0.0171141	plekhn1	NC_024316.1	11983831	11998794	-	4029	protein_coding	pleckstrin homology domain containing N1 && sp|Q494U1|PKHN1_HUMAN Pleckstrin homology domain-containing family N member 1 OS=Homo sapiens OX=9606 GN=PLEKHN1 PE=1 SV=3 && -	-
103385253	27.236	108.69	574.288	10.459	34.5898	31.1622	236.738	25.4037	3.2199	0.00015075	0.0171141	racgap1	NC_024316.1	15401910	15410859	+	2940	protein_coding	Rac GTPase activating protein 1 && sp|Q9H0H5|RGAP1_HUMAN Rac GTPase-activating protein 1 OS=Homo sapiens OX=9606 GN=RACGAP1 PE=1 SV=1 && PF00620:RhoGAP domain|PF00130:Phorbol esters/diacylglycerol binding domain (C1 domain)	-
103391209	2213.14	1224.57	1764.18	5927.13	6254.06	2542.23	1733.96	4907.81	-1.50096	0.000151762	0.0171141	sfxn1	NC_024321.1	15513464	15523928	-	4847	protein_coding	sideroflexin 1 && sp|Q9H9B4|SFXN1_HUMAN Sideroflexin-1 OS=Homo sapiens OX=9606 GN=SFXN1 PE=1 SV=4 && PF03820:Tricarboxylate carrier	-
103387939	88.7365	326.974	1042.19	62.7542	90.3799	95.4969	485.966	82.877	2.55129	0.00015193	0.0171141	ncapd2	NC_024319.1	2169800	2184796	-	4621	protein_coding	non-SMC condensin I complex subunit D2 && sp|Q9YHY6|CND1_XENLA Condensin complex subunit 1 OS=Xenopus laevis OX=8355 GN=ncapd2 PE=1 SV=1 && PF12717:non-SMC mitotic condensation complex subunit 1	-
103388845	18.4502	68.8367	374.94	12.5508	24.5476	12.0628	154.075	16.3871	3.23411	0.000152133	0.0171141	mad2l1	NC_024307.1	27722526	27724909	-	1062	protein_coding	mitotic arrest deficient 2 like 1 && sp|Q13257|MD2L1_HUMAN Mitotic spindle assembly checkpoint protein MAD2A OS=Homo sapiens OX=9606 GN=MAD2L1 PE=1 SV=1 && PF02301:HORMA domain	-
103398826	7.02863	0.905746	0	4.18361	91.4957	70.3661	2.64479	55.3485	-4.35994	0.000152855	0.0171141	LOC103398826	NW_007585130.1	57227	65771	+	3115	pseudogene	- && sp|Q8K0C1|IPO13_MOUSE Importin-13 OS=Mus musculus OX=10090 GN=Ipo13 PE=1 SV=1 && PF03810:Importin-beta N-terminal domain|PF08389:Exportin 1-like protein|PF18773:Importin 13 repeat	-
103382784	22.8431	17.2092	7.23024	176.758	217.581	12.0628	15.7608	135.467	-3.09811	0.000155978	0.0172508	wnt5b	NC_024314.1	22146632	22191800	-	1471	protein_coding	Wnt family member 5B%2C transcript variant X1 && sp|Q92050|WNT5B_DANRE Protein Wnt-5b OS=Danio rerio OX=7955 GN=wnt5b PE=2 SV=1 && PF00110:wnt family	-
103387202	369.003	478.234	250.993	173.62	91.4957	148.774	366.077	137.963	1.4075	0.000159454	0.0174814	LOC103387202	NC_024318.1	5956509	5990032	-	6075	protein_coding	leucine zipper putative tumor suppressor 2 homolog%2C transcript variant X2 && sp|Q6DIS8|LZTS2_XENTR Leucine zipper putative tumor suppressor 2 homolog OS=Xenopus tropicalis OX=8364 GN=lzts2 PE=2 SV=1 && PF06818:Fez1	-
103382361	2.63574	41.6643	167.328	2.09181	5.579	5.02615	70.5428	4.23232	4.05876	0.000160308	0.0174814	LOC103382361	NC_024314.1	13082652	13084761	+	674	protein_coding	baculoviral IAP repeat-containing protein 5-like && sp|Q28ER3|BIR52_XENTR Baculoviral IAP repeat-containing protein 5.2 OS=Xenopus tropicalis OX=8364 GN=birc5.2 PE=2 SV=2 && PF00653:Inhibitor of Apoptosis domain	-
103385986	13.1787	86.9517	299.538	7.32132	2.2316	23.1203	133.223	10.8911	3.60522	0.000160954	0.0174814	espl1	NC_024317.1	3992558	4004686	-	6222	protein_coding	extra spindle pole bodies like 1%2C separase && sp|Q14674|ESPL1_HUMAN Separin OS=Homo sapiens OX=9606 GN=ESPL1 PE=1 SV=3 && PF03568:Peptidase family C50	-
103379222	26.3574	96.9149	569.123	24.0558	15.6212	37.1935	230.798	25.6235	3.16857	0.000162817	0.0175784	nusap1	NC_024311.1	14765510	14769502	-	1883	protein_coding	nucleolar and spindle associated protein 1 && sp|A1L2F3|NUSAP_DANRE Nucleolar and spindle-associated protein 1 OS=Danio rerio OX=7955 GN=nusap1 PE=2 SV=2 && PF16006:Nucleolar and spindle-associated protein	-
103383060	14.9358	92.3861	241.697	4.18361	12.2738	21.1098	116.34	12.5224	3.21238	0.000168983	0.0179045	LOC103383060	NC_024314.1	29145608	29151997	-	3183	protein_coding	transcription factor E2F7 && sp|Q5RIX9|E2F7_DANRE Transcription factor E2F7 OS=Danio rerio OX=7955 GN=e2f7 PE=1 SV=2 && PF02319:E2F/DP family winged-helix DNA-binding domain	E2F
103380821	4.3929	19.9264	22.7236	89.9477	336.972	19.0994	15.681	148.673	-3.24844	0.000170272	0.0179045	gata4	NC_024313.1	4770371	4778184	+	2935	protein_coding	GATA binding protein 4%2C transcript variant X1 && sp|Q91677|GATA4_XENLA Transcription factor GATA-4 OS=Xenopus laevis OX=8355 GN=gata4 PE=2 SV=1 && PF05349:GATA-type transcription activator, N-terminal|PF00320:GATA zinc finger	zf-GATA
103393553	559.655	646.703	496.821	2064.61	729.734	2210.5	567.726	1668.28	-1.55511	0.000171391	0.0179045	LOC103393553	NC_024323.1	14118473	14128443	+	4159	protein_coding	endoplasmic reticulum membrane sensor NFE2L1-like && sp|Q14494|NF2L1_HUMAN Endoplasmic reticulum membrane sensor NFE2L1 OS=Homo sapiens OX=9606 GN=NFE2L1 PE=1 SV=1 && PF03131:bZIP Maf transcription factor	TF_bZIP
103377222	157.266	150.354	142.539	76.3509	61.369	72.3766	150.053	70.0322	1.09878	0.000171447	0.0179045	LOC103377222	NC_024309.1	10461366	10503802	+	5216	protein_coding	vasoactive intestinal polypeptide receptor%2C transcript variant X1 && sp|Q90308|VIPR_CARAU Vasoactive intestinal polypeptide receptor OS=Carassius auratus OX=7957 GN=vipr1 PE=2 SV=1 && PF00002:7 transmembrane receptor (Secretin family)|PF02793:Hormone receptor domain	-
novel.54	227.552	130.427	197.282	494.712	559.016	316.648	185.087	456.792	-1.30305	0.000171494	0.0179045	-	NC_024307.1	28239182	28242431	-	2850	-	- && - && -	-
103377539	29.8717	213.756	602.176	19.8722	24.5476	60.3138	281.935	34.9112	3.0115	0.00017241	0.0179045	ncapg2	NC_024309.1	15387285	15396043	-	3879	protein_coding	non-SMC condensin II complex subunit G2 && sp|E7FH61|CNDG2_DANRE Condensin-2 complex subunit G2 OS=Danio rerio OX=7955 GN=ncapg2 PE=3 SV=2 && -	-
103390270	50.9576	65.2137	35.1183	16.7345	12.2738	10.0523	50.4299	13.0202	1.95666	0.000172747	0.0179045	znf532	NC_024320.1	25159325	25171795	+	8541	protein_coding	zinc finger protein 532%2C transcript variant X1 && sp|Q9HCE3|ZN532_HUMAN Zinc finger protein 532 OS=Homo sapiens OX=9606 GN=ZNF532 PE=1 SV=2 && -	zf-C2H2
103388593	134.423	158.506	87.7958	58.5706	26.7792	39.204	126.908	41.5179	1.6114	0.000178682	0.0183744	LOC103388593	NC_024319.1	11527329	11534433	+	6643	protein_coding	putative nucleotidyltransferase FAM46A && sp|Q96IP4|TET5A_HUMAN Terminal nucleotidyltransferase 5A OS=Homo sapiens OX=9606 GN=TENT5A PE=1 SV=2 && PF07984:Nucleotidyltransferase	-
103380172	393.603	332.409	346.019	211.272	103.769	132.69	357.344	149.244	1.25911	0.000179307	0.0183744	LOC103380172	NC_024312.1	11978185	11985794	-	3283	protein_coding	leucine-rich repeat-containing protein 17-like && sp|Q9CXD9|LRC17_MOUSE Leucine-rich repeat-containing protein 17 OS=Mus musculus OX=10090 GN=Lrrc17 PE=2 SV=1 && PF13855:Leucine rich repeat	-
103394574	796.871	124.087	161.131	10352.3	6942.51	962.006	360.697	6085.62	-4.07638	0.000180483	0.0183911	LOC103394574	NC_024324.1	12736636	12741301	+	4123	protein_coding	circadian-associated transcriptional repressor%2C transcript variant X1 && sp|Q3TQ03|CIART_MOUSE Circadian-associated transcriptional repressor OS=Mus musculus OX=10090 GN=Ciart PE=1 SV=1 && PF15673:Circadian-associated transcriptional repressor	-
103388988	613.248	313.388	310.9	812.667	2310.82	975.074	412.512	1366.19	-1.72717	0.000185499	0.018765	agmo	NC_024319.1	21226415	21261182	+	2064	protein_coding	alkylglycerol monooxygenase && sp|Q6NYE4|ALKMO_DANRE Alkylglycerol monooxygenase OS=Danio rerio OX=7955 GN=agmo PE=2 SV=1 && -	-
103390716	16.693	108.69	493.722	8.36723	27.895	26.136	206.368	20.7994	3.31025	0.000186222	0.018765	ccna2	NC_024321.1	6772916	6776786	+	2264	protein_coding	cyclin A2 && sp|P20248|CCNA2_HUMAN Cyclin-A2 OS=Homo sapiens OX=9606 GN=CCNA2 PE=1 SV=2 && PF00134:Cyclin, N-terminal domain|PF02984:Cyclin, C-terminal domain|PF16500:N-terminal region of cyclin_N	-
103383343	108.944	144.014	51.6446	31.3771	26.7792	31.1622	101.534	29.7728	1.77111	0.000187992	0.0188386	LOC103383343	NC_024315.1	2425486	2430807	-	1445	protein_coding	uncharacterized LOC103383343 && - && -	-
103377086	49.2004	160.317	923.405	56.4788	52.4426	42.2197	377.641	50.3804	2.90566	0.000191798	0.0188566	tacc3	NC_024307.1	6711882	6718197	-	2872	protein_coding	transforming acidic coiled-coil containing protein 3%2C transcript variant X1 && sp|Q9PTG8|TACC3_XENLA Transforming acidic coiled-coil-containing protein 3 OS=Xenopus laevis OX=8355 GN=tacc3 PE=1 SV=2 && PF05010:Transforming acidic coiled-coil-containing protein (TACC), C-terminal	-
103385984	155.509	115.936	107.421	263.568	474.215	240.25	126.288	326.011	-1.36657	0.000192329	0.0188566	LOC103385984	NC_024317.1	4166285	4171990	-	2181	protein_coding	rho guanine nucleotide exchange factor 25 && sp|Q9CWR0|ARHGP_MOUSE Rho guanine nucleotide exchange factor 25 OS=Mus musculus OX=10090 GN=Arhgef25 PE=1 SV=1 && -	-
103399993	11.4215	62.4965	306.769	9.41313	14.5054	15.0785	126.896	12.999	3.28578	0.000198094	0.0192564	ect2	NC_024308.1	16076332	16108262	+	4538	protein_coding	epithelial cell transforming 2 && sp|Q9H8V3|ECT2_HUMAN Protein ECT2 OS=Homo sapiens OX=9606 GN=ECT2 PE=1 SV=4 && PF12738:twin BRCT domain|PF00621:RhoGEF domain	-
103386923	56.2291	36.2299	81.5984	1478.91	60.2532	1975.28	58.0191	1171.48	-4.33614	0.00019853	0.0192564	rnf227	NC_024307.1	24078626	24079655	-	623	protein_coding	ring finger protein 227 && - && -	-
103385490	133.544	78.7999	35.1183	415.224	787.755	111.581	82.4874	438.187	-2.40728	0.000202692	0.0193974	tmcc1	NC_024316.1	19772582	19803042	-	4058	protein_coding	transmembrane and coiled-coil domain family 1%2C transcript variant X2 && sp|Q69ZZ6|TMCC1_MOUSE Transmembrane and coiled-coil domains protein 1 OS=Mus musculus OX=10090 GN=Tmcc1 PE=1 SV=2 && PF10267:Predicted transmembrane and coiled-coil 2 protein	-
103386685	9.66437	67.931	432.781	12.5508	13.3896	20.1046	170.126	15.3484	3.46836	0.000203138	0.0193974	LOC103386685	NC_024317.1	17914856	17919353	-	2480	protein_coding	aurora kinase C && sp|Q91819|AURAB_XENLA Aurora kinase A-B OS=Xenopus laevis OX=8355 GN=aurka-b PE=2 SV=3 && PF00069:Protein kinase domain	-
103380617	20.2073	21.7379	38.217	115.049	203.076	43.2249	26.7207	120.45	-2.17537	0.000203192	0.0193974	epha7	NC_024313.1	563359	648356	-	7627	protein_coding	EPH receptor A7 && sp|O42422|EPHA7_CHICK Ephrin type-A receptor 7 OS=Gallus gallus OX=9031 GN=EPHA7 PE=2 SV=1 && PF00536:SAM domain (Sterile alpha motif)|PF07714:Protein tyrosine kinase|PF14575:Ephrin type-A receptor 2 transmembrane domain|PF00041:Fibronectin type III domain|PF01404:Ephrin receptor ligand binding domain|PF07699:Putative ephrin-receptor like	-
107988054	16.693	24.4552	13.4276	173.62	141.707	19.0994	18.1919	111.475	-2.61253	0.000206125	0.0195743	smox	NC_024315.1	5375364	5385303	+	2208	protein_coding	spermine oxidase && sp|Q9NWM0|SMOX_HUMAN Spermine oxidase OS=Homo sapiens OX=9606 GN=SMOX PE=1 SV=1 && PF01593:Flavin containing amine oxidoreductase	-
103382043	36.0217	27.1724	28.921	6.27542	7.81061	2.01046	30.705	5.3655	2.52983	0.000209046	0.0197042	LOC103382043	NC_024314.1	10548854	10570203	-	3301	protein_coding	matrix metalloproteinase-17-like && sp|Q9NPA2|MMP25_HUMAN Matrix metalloproteinase-25 OS=Homo sapiens OX=9606 GN=MMP25 PE=1 SV=1 && PF01471:Putative peptidoglycan binding domain|PF00045:Hemopexin|PF00413:Matrixin	-
103383214	581.619	135.862	271.65	77.3968	91.4957	104.544	329.711	91.1455	1.85515	0.000211171	0.0197042	ncf4	NC_024315.1	893286	908078	-	1847	protein_coding	neutrophil cytosolic factor 4 && sp|Q15080|NCF4_HUMAN Neutrophil cytosol factor 4 OS=Homo sapiens OX=9606 GN=NCF4 PE=1 SV=2 && PF00787:PX domain|PF00018:SH3 domain|PF00564:PB1 domain	-
103394661	824.986	1018.06	666.215	460.197	234.318	371.935	836.42	355.484	1.2342	0.000211781	0.0197042	kiaa1522	NC_024324.1	14098198	14121430	-	5716	protein_coding	KIAA1522 ortholog && sp|Q1LWM5|K1522_DANRE Uncharacterized protein KIAA1522 homolog OS=Danio rerio OX=7955 GN=si:ch211-194e15.5 PE=4 SV=1 && -	-
103382084	14.9358	48.9103	244.795	12.5508	10.0422	13.068	102.88	11.887	3.11043	0.000211838	0.0197042	g2e3	NC_024307.1	16397563	16404041	-	3022	protein_coding	G2/M-phase specific E3 ubiquitin protein ligase && sp|Q7L622|G2E3_HUMAN G2/M phase-specific E3 ubiquitin-protein ligase OS=Homo sapiens OX=9606 GN=G2E3 PE=1 SV=1 && PF13771:PHD-like zinc-binding domain|PF00632:HECT-domain (ubiquitin-transferase)	-
103395506	7.90721	21.7379	152.868	2.09181	5.579	6.03138	60.8377	4.5674	3.73304	0.000216255	0.0198584	haus1	NC_024325.1	14655007	14657312	+	1010	protein_coding	HAUS augmin like complex subunit 1 && sp|Q96CS2|HAUS1_HUMAN HAUS augmin-like complex subunit 1 OS=Homo sapiens OX=9606 GN=HAUS1 PE=1 SV=1 && -	-
103381343	28.1145	129.522	532.972	27.1935	18.9686	43.2249	230.203	29.7957	2.94733	0.000216306	0.0198584	bub1	NC_024313.1	13544878	13552383	+	4139	protein_coding	BUB1 mitotic checkpoint serine/threonine kinase && sp|O43683|BUB1_HUMAN Mitotic checkpoint serine/threonine-protein kinase BUB1 OS=Homo sapiens OX=9606 GN=BUB1 PE=1 SV=1 && PF08311:Mad3/BUB1 homology region 1|PF00069:Protein kinase domain	-
103377762	633.456	480.046	360.479	244.741	153.981	231.203	491.327	209.975	1.22635	0.000217594	0.0198584	adamts15	NC_024310.1	5246850	5264796	-	4135	protein_coding	ADAM metallopeptidase with thrombospondin type 1 motif 15 && sp|P59384|ATS15_MOUSE A disintegrin and metalloproteinase with thrombospondin motifs 15 OS=Mus musculus OX=10090 GN=Adamts15 PE=1 SV=2 && PF17771:ADAM cysteine-rich domain|PF05986:ADAM-TS Spacer 1|PF01421:Reprolysin (M12B) family zinc metalloprotease|PF00090:Thrombospondin type 1 domain|PF01562:Reprolysin family propeptide	-
103389241	62.3791	48.9103	52.6775	129.692	150.633	104.544	54.6556	128.29	-1.2291	0.00021801	0.0198584	LOC103389241	NC_024307.1	28237338	28239171	+	899	protein_coding	uncharacterized LOC103389241 && - && -	-
103395527	106.308	529.862	83.6642	41.8361	49.0952	47.2458	239.945	46.0591	2.38173	0.000218971	0.0198584	LOC103395527	NC_024325.1	15142963	15174145	-	3488	protein_coding	actin-binding LIM protein 3-like && sp|O94929|ABLM3_HUMAN Actin-binding LIM protein 3 OS=Homo sapiens OX=9606 GN=ABLIM3 PE=1 SV=3 && PF00412:LIM domain|PF16182:Putative adherens-junction anchoring region of AbLIM|PF02209:Villin headpiece domain	-
103376830	596.555	337.843	382.17	2123.18	745.355	1062.53	438.856	1310.36	-1.57799	0.000224444	0.0202536	f3	NC_024309.1	247589	255749	-	2237	protein_coding	coagulation factor III%2C tissue factor && sp|P30931|TF_BOVIN Tissue factor OS=Bos taurus OX=9913 GN=F3 PE=1 SV=1 && PF09294:Interferon-alpha/beta receptor, fibronectin type III|PF01108:Tissue factor	-
103388772	70.2863	34.4184	45.4472	107.728	198.613	132.69	50.0506	146.344	-1.54547	0.000226541	0.0203416	hpn	NC_024319.1	16306324	16317387	-	3153	protein_coding	hepsin%2C transcript variant X2 && sp|O35453|HEPS_MOUSE Serine protease hepsin OS=Mus musculus OX=10090 GN=Hpn PE=1 SV=3 && PF00089:Trypsin|PF09272:Hepsin, SRCR domain	-
103392979	385.696	211.945	95.026	1410.92	1594.48	303.58	230.889	1102.99	-2.25534	0.000229774	0.020436	LOC103392979	NC_024323.1	7573859	7576401	+	1519	protein_coding	lysoplasmalogenase-like && sp|F1RMN2|TM86B_PIG Lysoplasmalogenase OS=Sus scrofa OX=9823 GN=TMEM86B PE=3 SV=1 && PF07947:YhhN family	-
103397729	54.4719	73.3655	53.7104	260.43	631.543	61.3191	60.5159	317.764	-2.39176	0.000230067	0.020436	sec14l2	NC_024328.1	9959155	9969637	-	2228	protein_coding	SEC14 like lipid binding 2%2C transcript variant X2 && sp|P58875|S14L2_BOVIN SEC14-like protein 2 OS=Bos taurus OX=9913 GN=SEC14L2 PE=1 SV=2 && PF00650:CRAL/TRIO domain	-
103381669	429.625	191.113	291.275	95.1772	146.17	98.5126	304.004	113.287	1.42534	0.000230973	0.020436	LOC103381669	NC_024314.1	4697336	4705751	+	7133	protein_coding	cytochrome P450 26A1 && sp|P79739|CP26A_DANRE Cytochrome P450 26A1 OS=Danio rerio OX=7955 GN=cyp26a1 PE=1 SV=1 && PF00067:Cytochrome P450	-
103394360	17.5716	55.2505	286.111	8.36723	17.8528	16.0837	119.644	14.1012	3.08396	0.000244137	0.0214959	sgo1	NC_024324.1	9990227	9994284	-	2398	protein_coding	shugoshin 1 && sp|Q4KLP8|SGO1_XENLA Shugoshin 1 OS=Xenopus laevis OX=8355 GN=sgo1 PE=1 SV=1 && PF07557:Shugoshin C terminus	-
103388281	382.182	245.457	176.624	813.713	649.396	527.746	268.088	663.618	-1.30653	0.000247267	0.0215948	LOC103388281	NC_024319.1	5215188	5230494	+	2658	protein_coding	ceramide synthase 2-like%2C transcript variant X2 && sp|Q3ZBF8|CERS2_BOVIN Ceramide synthase 2 OS=Bos taurus OX=9913 GN=CERS2 PE=2 SV=1 && PF00046:Homeodomain|PF03798:TLC domain	Homeobox
103377356	41.2932	68.8367	379.071	11.5049	35.7056	22.1151	163.067	23.1085	2.81945	0.000247641	0.0215948	mastl	NC_024309.1	12027025	12033138	-	3198	protein_coding	microtubule associated serine/threonine kinase like%2C transcript variant X1 && sp|Q6DBX4|GWL_DANRE Serine/threonine-protein kinase greatwall OS=Danio rerio OX=7955 GN=mastl PE=2 SV=1 && PF00069:Protein kinase domain	-
103384755	347.039	208.322	178.69	532.365	887.062	487.537	244.684	635.654	-1.37618	0.000249328	0.0216379	gata5	NC_024316.1	6373224	6381861	+	2470	protein_coding	GATA binding protein 5 && sp|P43695|GAT5A_XENLA GATA-binding factor 5-A OS=Xenopus laevis OX=8355 GN=gata5-a PE=2 SV=1 && PF05349:GATA-type transcription activator, N-terminal|PF00320:GATA zinc finger	zf-GATA
103378321	23.7216	29.8896	98.1247	12.5508	4.4632	5.02615	50.5787	7.34673	2.77783	0.000254514	0.0219759	LOC103378321	NC_024310.1	14847224	14888456	+	6556	protein_coding	protein turtle homolog B%2C transcript variant X1 && sp|Q9UPX0|TUTLB_HUMAN Protein turtle homolog B OS=Homo sapiens OX=9606 GN=IGSF9B PE=2 SV=2 && PF13927:Immunoglobulin domain|PF00041:Fibronectin type III domain|PF07686:Immunoglobulin V-set domain|PF07679:Immunoglobulin I-set domain	-
103386252	14.0573	101.444	555.696	7.32132	2.2316	11.0575	223.732	6.87015	5.02141	0.000255646	0.0219759	LOC103386252	NC_024317.1	9462815	9468895	+	3375	protein_coding	rac GTPase-activating protein 1-like%2C transcript variant X2 && sp|Q9H0H5|RGAP1_HUMAN Rac GTPase-activating protein 1 OS=Homo sapiens OX=9606 GN=RACGAP1 PE=1 SV=1 && PF00130:Phorbol esters/diacylglycerol binding domain (C1 domain)|PF00620:RhoGAP domain	-
103387252	367.246	433.853	296.44	134.922	11.158	74.3871	365.846	73.4889	2.31443	0.000268786	0.0228883	grem2	NC_024318.1	6901309	6910667	-	2168	protein_coding	gremlin 2%2C DAN family BMP antagonist && sp|O88273|GREM2_MOUSE Gremlin-2 OS=Mus musculus OX=10090 GN=Grem2 PE=1 SV=1 && PF03045:DAN domain	-
novel.314	3.51432	4.52873	5.16446	30.3312	27.895	18.0942	4.4025	25.4401	-2.5362	0.000271975	0.0228883	-	NC_024316.1	19770960	19772363	+	1195	-	- && - && -	-
103396299	1139.52	694.708	740.583	4471.24	2785.04	1116.81	858.269	2791.03	-1.70118	0.000272292	0.0228883	cebpd	NC_024326.1	6837106	6838587	+	1482	protein_coding	CCAAT enhancer binding protein delta && sp|Q00322|CEBPD_MOUSE CCAAT/enhancer-binding protein delta OS=Mus musculus OX=10090 GN=Cebpd PE=1 SV=2 && PF07716:Basic region leucine zipper	C/EBP
107990150	41.2932	122.276	120.848	25.1017	18.9686	31.1622	94.8058	25.0775	1.91481	0.00027257	0.0228883	LOC107990150	NC_024308.1	10545662	10553049	+	941	protein_coding	uncharacterized LOC107990150%2C transcript variant X2 && - && -	-
103398224	491.126	226.437	255.124	1238.35	1663.66	452.354	324.229	1118.12	-1.7855	0.000276681	0.0230064	gda	NC_024328.1	18753943	18765011	+	2335	protein_coding	guanine deaminase%2C transcript variant X1 && sp|Q9R111|GUAD_MOUSE Guanine deaminase OS=Mus musculus OX=10090 GN=Gda PE=1 SV=1 && PF01979:Amidohydrolase family	-
103392828	33.386	178.432	607.34	14.6426	23.4318	64.3348	273.053	34.1364	2.99751	0.000278828	0.0230064	cenpx	NC_024323.1	5692759	5695930	+	1991	protein_coding	centromere protein X && sp|P0DJH7|CENPX_CHICK Centromere protein X OS=Gallus gallus OX=9031 GN=CENPX PE=1 SV=1 && -	-
103396925	0	0.905746	1.03289	50.2034	31.2424	1.00523	0.646213	27.4837	-5.44298	0.000278884	0.0230064	LOC103396925	NC_024327.1	1879530	1906581	-	4006	protein_coding	adipocyte enhancer-binding protein 1-like && sp|Q640N1|AEBP1_MOUSE Adipocyte enhancer-binding protein 1 OS=Mus musculus OX=10090 GN=Aebp1 PE=1 SV=1 && PF00246:Zinc carboxypeptidase|PF13620:Carboxypeptidase regulatory-like domain|PF00754:F5/8 type C domain	-
103391993	45.6861	24.4552	30.9867	10.459	2.2316	3.01569	33.7093	5.23544	2.68357	0.000291432	0.0239185	pla1a	NC_024322.1	8995658	9001068	-	2127	protein_coding	phospholipase A1 member A%2C transcript variant X1 && sp|Q6NYZ4|PLA1A_DANRE Phospholipase A1 member A OS=Danio rerio OX=7955 GN=pla1a PE=2 SV=1 && PF00151:Lipase	-
103394153	465.647	329.692	245.828	112.958	147.286	175.915	347.056	145.386	1.25575	0.000299799	0.0243064	LOC103394153	NC_024324.1	5801549	6034197	+	14025	protein_coding	CUB and sushi domain-containing protein 3-like && sp|Q7Z407|CSMD3_HUMAN CUB and sushi domain-containing protein 3 OS=Homo sapiens OX=9606 GN=CSMD3 PE=2 SV=3 && PF00084:Sushi repeat (SCR repeat)|PF00431:CUB domain	-
103387010	5.27148	32.6069	170.427	3.13771	5.579	8.04185	69.4351	5.58619	3.63153	0.000300178	0.0243064	fbxo5	NC_024318.1	3315252	3318914	+	1641	protein_coding	F-box protein 5 && sp|Q0V967|FBX5_DANRE F-box only protein 5 OS=Danio rerio OX=7955 GN=fbxo5 PE=1 SV=2 && PF00646:F-box domain	-
103388121	0.878579	0	0	16.7345	7.81061	17.0889	0.29286	13.878	-5.37209	0.000302853	0.024414	LOC103388121	NC_024319.1	3393806	3400048	-	2491	protein_coding	amine sulfotransferase-like%2C transcript variant X2 && sp|O46640|ST3A1_RABIT Amine sulfotransferase OS=Oryctolagus cuniculus OX=9986 GN=SULT3A1 PE=1 SV=1 && PF00685:Sulfotransferase domain	-
103390952	7.02863	50.7218	167.328	2.09181	5.579	12.0628	75.0263	6.57786	3.50545	0.000305455	0.0245148	LOC103390952	NC_024321.1	10461523	10463470	-	1113	protein_coding	polyamine-modulated factor 1-like && sp|Q9CPV5|PMF1_MOUSE Polyamine-modulated factor 1 OS=Mus musculus OX=10090 GN=Pmf1 PE=1 SV=1 && PF03980:Nnf1	-
novel.466	21.9645	67.931	13.4276	6.27542	0	2.01046	34.441	2.76196	3.6312	0.000310438	0.0248049	-	NC_024320.1	27551293	27554128	+	1964	-	- && - && -	-
103381335	14.0573	72.4597	181.789	11.5049	12.2738	15.0785	89.4353	12.9524	2.78469	0.000314014	0.0249806	nsl1	NC_024313.1	13454585	13458243	-	2193	protein_coding	NSL1%2C MIS12 kinetochore complex component && - && PF08641:Kinetochore protein Mis14 like	-
103395426	111.58	644.891	1520.42	94.1313	167.37	157.821	758.962	139.774	2.44072	0.000323731	0.0256412	LOC103395426	NC_024325.1	13830030	13836539	+	2867	protein_coding	ribonucleoside-diphosphate reductase large subunit-like && sp|P07742|RIR1_MOUSE Ribonucleoside-diphosphate reductase large subunit OS=Mus musculus OX=10090 GN=Rrm1 PE=1 SV=2 && PF00317:Ribonucleotide reductase, all-alpha domain|PF02867:Ribonucleotide reductase, barrel domain|PF03477:ATP cone domain	-
103385911	244.245	226.437	176.624	56.4788	75.8745	122.638	215.769	84.9971	1.34323	0.000331229	0.026121	LOC103385911	NC_024317.1	3448915	3452656	-	2067	protein_coding	PAK4-inhibitor inka2-like%2C transcript variant X1 && sp|F1QR98|INK1A_DANRE PAK4-inhibitor inka1 OS=Danio rerio OX=7955 GN=fam212aa PE=2 SV=1 && PF15342:FAM212 family	-
103393408	22.8431	67.0252	384.236	17.7804	18.9686	26.136	158.035	20.9617	2.91227	0.000342975	0.0269302	LOC103393408	NC_024323.1	13046253	13048940	+	1458	protein_coding	uncharacterized LOC103393408%2C transcript variant X2 && - && -	-
103378514	2706.9	2799.66	3139.99	8747.93	3658.71	8842.01	2882.18	7082.88	-1.29723	0.000347315	0.0271535	LOC103378514	NC_024310.1	18207755	18210464	+	2414	protein_coding	mRNA decay activator protein ZFP36L2-like && sp|P22893|TTP_MOUSE mRNA decay activator protein ZFP36 OS=Mus musculus OX=10090 GN=Zfp36 PE=1 SV=1 && PF00642:Zinc finger C-x8-C-x5-C-x3-H type (and similar)	-
novel.578	14.9358	28.9839	33.0525	100.407	45.7478	148.774	25.6574	98.3096	-1.94336	0.000349294	0.0271909	-	NC_024323.1	3827103	3830391	-	1991	-	- && - && -	-
103389571	14.9358	52.5333	267.519	20.9181	7.81061	10.0523	111.663	12.927	3.10781	0.000357438	0.027706	bub1b	NC_024307.1	4357937	4361115	-	1886	protein_coding	BUB1 mitotic checkpoint serine/threonine kinase B && sp|O60566|BUB1B_HUMAN Mitotic checkpoint serine/threonine-protein kinase BUB1 beta OS=Homo sapiens OX=9606 GN=BUB1B PE=1 SV=3 && PF08311:Mad3/BUB1 homology region 1	-
103394001	16.693	67.931	337.755	14.6426	21.2002	18.0942	140.793	17.979	2.96835	0.000360284	0.0277123	cdca8	NC_024324.1	2984875	2988392	+	1325	protein_coding	cell division cycle associated 8 && sp|Q5XLR4|BORE1_DANRE Borealin OS=Danio rerio OX=7955 GN=cdca8 PE=2 SV=2 && PF10444:Nbl1 / Borealin N terminal|PF10512:Cell division cycle-associated protein 8	-
103385906	61.5005	37.1356	23.7565	102.499	91.4957	297.548	40.7976	163.847	-2.00334	0.000368234	0.0281816	LOC103385906	NC_024317.1	3197009	3205504	+	2348	protein_coding	metabotropic glutamate receptor 2-like && sp|Q14416|GRM2_HUMAN Metabotropic glutamate receptor 2 OS=Homo sapiens OX=9606 GN=GRM2 PE=1 SV=2 && PF01094:Receptor family ligand binding region|PF00003:7 transmembrane sweet-taste receptor of 3 GCPR|PF07562:Nine Cysteines Domain of family 3 GPCR	-
103387122	3531.89	1897.54	1039.09	8834.74	12655.4	3100.13	2156.17	8196.76	-1.92648	0.000376844	0.0287193	abcg8	NC_024318.1	5396467	5401520	-	2405	protein_coding	ATP binding cassette subfamily G member 8 && sp|Q9DBM0|ABCG8_MOUSE ATP-binding cassette sub-family G member 8 OS=Mus musculus OX=10090 GN=Abcg8 PE=1 SV=1 && PF01061:ABC-2 type transporter|PF00005:ABC transporter	-
103386801	432.261	409.397	331.558	836.723	1085.67	584.039	391.072	835.479	-1.09449	0.000387945	0.0293541	LOC103386801	NC_024307.1	24249925	24268404	-	1473	protein_coding	uncharacterized LOC103386801 && - && -	-
103395546	42.1718	56.1563	55.7761	15.6885	20.0844	8.04185	51.3681	14.6049	1.8203	0.00038965	0.0293541	LOC103395546	NC_024325.1	15428958	15431469	+	1120	protein_coding	uncharacterized LOC103395546 && - && PF01110:Ciliary neurotrophic factor	-
103381431	806.536	348.712	645.557	2088.67	4236.7	730.803	600.268	2352.06	-1.97017	0.000390028	0.0293541	slc39a8	NC_024307.1	16096691	16102696	+	2003	protein_coding	solute carrier family 39 member 8 && sp|Q9C0K1|S39A8_HUMAN Metal cation symporter ZIP8 OS=Homo sapiens OX=9606 GN=SLC39A8 PE=1 SV=1 && PF02535:ZIP Zinc transporter	-
103379070	21.0859	83.3287	350.15	13.5967	13.3896	33.1726	151.522	20.053	2.91399	0.000392833	0.0294044	LOC103379070	NC_024311.1	11270465	11280672	-	4002	protein_coding	kinesin-like protein KIF23%2C transcript variant X1 && sp|Q02241|KIF23_HUMAN Kinesin-like protein KIF23 OS=Homo sapiens OX=9606 GN=KIF23 PE=1 SV=3 && PF16540:Arf6-interacting domain of mitotic kinesin-like protein 1|PF00225:Kinesin motor domain	-
103386401	183.623	142.202	124.98	357.699	405.036	238.24	150.268	333.658	-1.14918	0.000398273	0.0296061	LOC103386401	NC_024317.1	12452353	12465849	-	1909	protein_coding	sterol O-acyltransferase 2-like && sp|Q7TQM4|SOAT2_RAT Sterol O-acyltransferase 2 OS=Rattus norvegicus OX=10116 GN=Soat2 PE=2 SV=1 && -	-
103394509	14.9358	11.7747	14.4605	38.6984	37.9372	67.3505	13.7237	47.9954	-1.80881	0.000402046	0.0297162	LOC103394509	NC_024324.1	11956728	11962209	+	2438	protein_coding	connective tissue growth factor-like && sp|O18739|CCN2_BOVIN CCN family member 2 OS=Bos taurus OX=9913 GN=CCN2 PE=2 SV=2 && PF00219:Insulin-like growth factor binding protein|PF00007:Cystine-knot domain|PF00093:von Willebrand factor type C domain	-
103396202	246.002	384.942	514.38	145.381	93.7273	194.01	381.775	144.372	1.40121	0.000406579	0.0297162	LOC103396202	NC_024326.1	5626700	5636420	+	3727	protein_coding	polymeric immunoglobulin receptor-like%2C transcript variant X2 && - && PF07686:Immunoglobulin V-set domain	-
103395906	180.109	192.018	165.263	95.1772	75.8745	96.5021	179.13	89.1846	1.00542	0.000406917	0.0297162	LOC103395906	NC_024326.1	1389980	1403097	+	3280	protein_coding	mitogen-activated protein kinase kinase kinase 7-like && sp|Q9ESL4|M3K20_MOUSE Mitogen-activated protein kinase kinase kinase 20 OS=Mus musculus OX=10090 GN=Map3k20 PE=1 SV=1 && PF07714:Protein tyrosine kinase	-
103391093	1953.96	1986.3	1854.04	1300.06	740.892	821.273	1931.43	954.074	1.01744	0.000407215	0.0297162	sparc	NC_024321.1	12931983	12944426	+	1527	protein_coding	secreted protein acidic and cysteine rich && sp|O93390|SPRC_COTJA SPARC OS=Coturnix japonica OX=93934 GN=SPARC PE=2 SV=1 && PF09289:Follistatin/Osteonectin-like EGF domain|PF10591:Secreted protein acidic and rich in cysteine Ca binding region|PF00050:Kazal-type serine protease inhibitor domain	-
103392669	217.888	289.839	255.124	1055.32	1132.54	278.449	254.284	822.101	-1.69274	0.000407946	0.0297162	hsd3b7	NC_024323.1	3214333	3220732	+	2115	protein_coding	hydroxy-delta-5-steroid dehydrogenase%2C 3 beta- and steroid delta-isomerase 7 && sp|Q9EQC1|3BHS7_MOUSE 3 beta-hydroxysteroid dehydrogenase type 7 OS=Mus musculus OX=10090 GN=Hsd3b7 PE=1 SV=1 && -	-
103389486	296.081	250.892	215.874	793.841	382.72	570.971	254.282	582.51	-1.19555	0.000411872	0.0298822	LOC103389486	NC_024307.1	28567311	28572861	-	2042	protein_coding	phosphatidylcholine_ceramide cholinephosphotransferase 2-like && sp|Q4JM44|SMS2_RAT Phosphatidylcholine:ceramide cholinephosphotransferase 2 OS=Rattus norvegicus OX=10116 GN=Sgms2 PE=1 SV=2 && PF14360:PAP2 superfamily C-terminal	-
103397744	1324.02	960.091	763.307	2653.46	3615.19	1477.69	1015.81	2582.11	-1.34567	0.000416436	0.0300929	LOC103397744	NC_024328.1	9493573	9502209	-	2261	protein_coding	glycerol-3-phosphate acyltransferase 3-like && sp|A3KGT9|GPT3L_DANRE Glycerol-3-phosphate acyltransferase 3-like OS=Danio rerio OX=7955 GN=agpat9l PE=3 SV=1 && PF01553:Acyltransferase	-
103378652	18.4502	138.579	556.728	18.8263	23.4318	46.2406	237.919	29.4996	3.0098	0.000420831	0.0302756	diaph3	NC_024311.1	2867760	3043500	+	6352	protein_coding	diaphanous related formin 3%2C transcript variant X1 && sp|Q9NSV4|DIAP3_HUMAN Protein diaphanous homolog 3 OS=Homo sapiens OX=9606 GN=DIAPH3 PE=1 SV=4 && PF06367:Diaphanous FH3 Domain|PF06371:Diaphanous GTPase-binding Domain|PF06345:DRF Autoregulatory Domain|PF02181:Formin Homology 2 Domain	-
103382681	17.5716	30.7954	40.2828	140.151	112.696	53.2772	29.5499	102.041	-1.79193	0.000422303	0.0302756	LOC103382681	NC_024314.1	19238137	19239755	+	1619	protein_coding	alpha-(1%2C3)-fucosyltransferase 9-like && sp|O88819|FUT9_MOUSE 4-galactosyl-N-acetylglucosaminide 3-alpha-L-fucosyltransferase 9 OS=Mus musculus OX=10090 GN=Fut9 PE=1 SV=1 && PF00852:Glycosyltransferase family 10 (fucosyltransferase) C-term|PF17039:Fucosyltransferase, N-terminal	-
103379343	41.2932	79.7057	119.815	17.7804	14.5054	0	80.2714	10.7619	2.90342	0.000428293	0.0304893	gpi	NC_024311.1	17507040	17512073	+	1942	protein_coding	glucose-6-phosphate isomerase && sp|P06744|G6PI_HUMAN Glucose-6-phosphate isomerase OS=Homo sapiens OX=9606 GN=GPI PE=1 SV=4 && PF00342:Phosphoglucose isomerase	-
112488007	2.63574	137.673	10.3289	1.0459	4.4632	0	50.2127	1.83637	4.79694	0.000428645	0.0304893	LOC112488007	NC_024320.1	27588257	27589876	-	892	protein_coding	low affinity immunoglobulin epsilon Fc receptor-like && sp|P20693|FCER2_MOUSE Low affinity immunoglobulin epsilon Fc receptor OS=Mus musculus OX=10090 GN=Fcer2 PE=1 SV=1 && PF00059:Lectin C-type domain	-
103386595	280.267	369.545	1732.16	207.089	126.086	203.057	793.99	178.744	2.15059	0.000440559	0.0310102	LOC103386595	NC_024317.1	16294543	16308287	+	3856	protein_coding	T-complex protein 11-like protein 1%2C transcript variant X1 && sp|Q9NUJ3|T11L1_HUMAN T-complex protein 11-like protein 1 OS=Homo sapiens OX=9606 GN=TCP11L1 PE=1 SV=1 && PF05794:T-complex protein 11	-
103393610	21.0859	35.3241	26.8552	8.36723	2.2316	2.01046	27.7551	4.2031	2.72092	0.000440805	0.0310102	LOC103393610	NC_024308.1	2381517	2443041	+	3273	protein_coding	zinc finger protein GLIS1 && sp|Q8K1M4|GLIS1_MOUSE Zinc finger protein GLIS1 OS=Mus musculus OX=10090 GN=Glis1 PE=1 SV=2 && -	zf-C2H2
103390548	7.02863	29.8896	242.729	6.27542	11.158	8.04185	93.2159	8.49176	3.45639	0.000442768	0.0310102	cenpi	NC_024321.1	1300389	1309013	-	2732	protein_coding	centromere protein I && sp|Q8AYS7|CENPI_CHICK Centromere protein I OS=Gallus gallus OX=9031 GN=CENPI PE=1 SV=1 && PF07778:Mis6	-
103383542	145.844	290.745	192.118	107.728	46.8636	67.3505	209.569	73.9807	1.50121	0.000442808	0.0310102	mab21l2	NC_024315.1	5228906	5231808	+	2903	protein_coding	mab-21 like 2 && sp|Q8UUZ1|MB212_DANRE Protein mab-21-like 2 OS=Danio rerio OX=7955 GN=mab21l2 PE=1 SV=1 && PF03281:Mab-21 protein	-
103382373	446.318	380.414	252.025	191.4	107.117	158.826	359.586	152.448	1.23793	0.000449216	0.031338	loxl3	NC_024307.1	16760800	16776234	+	3724	protein_coding	lysyl oxidase like 3%2C transcript variant X3 && sp|B8A4W9|LOX3B_DANRE Lysyl oxidase homolog 3B OS=Danio rerio OX=7955 GN=loxl3b PE=2 SV=1 && PF01186:Lysyl oxidase|PF00530:Scavenger receptor cysteine-rich domain	-
103382809	164.294	197.453	127.046	82.6264	40.1688	69.3609	162.931	64.052	1.3458	0.000460048	0.0319045	smo	NC_024314.1	22797023	22803148	+	3122	protein_coding	smoothened%2C frizzled class receptor%2C transcript variant X2 && sp|O42224|SMO_CHICK Smoothened homolog (Fragment) OS=Gallus gallus OX=9031 GN=SMO PE=2 SV=1 && PF01534:Frizzled/Smoothened family membrane region	-
103397375	236.338	366.827	176.624	138.059	49.0952	54.2825	259.93	80.479	1.69139	0.000461497	0.0319045	mamdc2	NC_024328.1	1072970	1092051	+	3545	protein_coding	MAM domain containing 2%2C transcript variant X1 && sp|Q7Z304|MAMC2_HUMAN MAM domain-containing protein 2 OS=Homo sapiens OX=9606 GN=MAMDC2 PE=1 SV=3 && PF00629:MAM domain, meprin/A5/mu	-
103387641	267.967	353.241	268.552	174.666	139.475	107.56	296.587	140.567	1.07787	0.000462614	0.0319045	LOC103387641	NC_024318.1	14915528	14941048	-	3984	protein_coding	gamma-adducin-like%2C transcript variant X1 && sp|Q9UEY8|ADDG_HUMAN Gamma-adducin OS=Homo sapiens OX=9606 GN=ADD3 PE=1 SV=1 && PF00596:Class II Aldolase and Adducin N-terminal domain	-
103393804	2144.61	1022.59	1373.75	5829.86	6231.75	1909.94	1513.65	4657.18	-1.62135	0.000474516	0.0324784	LOC103393804	NC_024324.1	479597	487151	-	3321	protein_coding	venom phosphodiesterase 1-like && sp|J3SEZ3|PDE1_CROAD Venom phosphodiesterase 1 OS=Crotalus adamanteus OX=8729 PE=1 SV=2 && PF01663:Type I phosphodiesterase / nucleotide pyrophosphatase|PF01223:DNA/RNA non-specific endonuclease	-
112486250	18.4502	182.961	371.841	26.1476	21.2002	40.2092	191.084	29.1857	2.70874	0.000479882	0.0327222	knl1	NC_024313.1	11059368	11067628	-	5271	protein_coding	kinetochore scaffold 1 && sp|Q8NG31|KNL1_HUMAN Kinetochore scaffold 1 OS=Homo sapiens OX=9606 GN=KNL1 PE=1 SV=3 && PF18210:Knl1 RWD C-terminal domain	-
103378948	491.126	787.094	463.768	288.669	177.412	294.533	580.663	253.538	1.1951	0.000490694	0.0332097	gas6	NC_024311.1	8095565	8109251	-	2441	protein_coding	growth arrest specific 6 && sp|Q14393|GAS6_HUMAN Growth arrest-specific protein 6 OS=Homo sapiens OX=9606 GN=GAS6 PE=1 SV=3 && PF00054:Laminin G domain|PF00594:Vitamin K-dependent carboxylation/gamma-carboxyglutamic (GLA) domain|PF02210:Laminin G domain|PF07645:Calcium-binding EGF domain	-
103377126	7.02863	43.4758	97.0918	6.27542	0	6.03138	49.1988	4.10227	3.57017	0.000494177	0.0333211	mybl1	NC_024309.1	8951579	8962713	+	5968	protein_coding	MYB proto-oncogene like 1%2C transcript variant X1 && sp|P10243|MYBA_HUMAN Myb-related protein A OS=Homo sapiens OX=9606 GN=MYBL1 PE=1 SV=2 && PF07988:LMSTEN motif|PF09316:C-myb, C-terminal|PF00249:Myb-like DNA-binding domain	MYB
103390260	21.0859	11.7747	20.6578	51.2493	42.4004	94.4917	17.8395	62.7138	-1.81742	0.000499333	0.0335441	esm1	NC_024320.1	24960119	24961801	-	1194	protein_coding	endothelial cell specific molecule 1 && sp|P97682|ESM1_RAT Endothelial cell-specific molecule 1 OS=Rattus norvegicus OX=10116 GN=Esm1 PE=2 SV=1 && PF00219:Insulin-like growth factor binding protein	-
103391411	25.4788	164.846	621.801	40.7902	21.2002	52.272	270.708	38.0875	2.82744	0.000521039	0.0347449	LOC103391411	NC_024321.1	19378224	19384183	+	2670	protein_coding	centrosome-associated protein CEP250 && sp|O75330|HMMR_HUMAN Hyaluronan mediated motility receptor OS=Homo sapiens OX=9606 GN=HMMR PE=1 SV=2 && PF15905:Hyaluronan mediated motility receptor N-terminal	-
103397545	347.917	284.404	360.479	1264.5	546.742	620.227	330.934	810.489	-1.29247	0.000524966	0.0347566	LOC103397545	NC_024328.1	4468207	4474842	+	3034	protein_coding	prolactin receptor-like && sp|Q91513|PRLR_ORENI Prolactin receptor OS=Oreochromis niloticus OX=8128 GN=prlr PE=2 SV=1 && PF09067:Erythropoietin receptor, ligand binding	-
103388656	70.2863	78.7999	181.789	18.8263	22.316	47.2458	110.292	29.4627	1.89943	0.000525047	0.0347566	depdc1b	NC_024319.1	13215084	13236676	-	5442	protein_coding	DEP domain containing 1B%2C transcript variant X3 && sp|Q8BH88|DEP1B_MOUSE DEP domain-containing protein 1B OS=Mus musculus OX=10090 GN=Depdc1b PE=2 SV=1 && PF00620:RhoGAP domain|PF00610:Domain found in Dishevelled, Egl-10, and Pleckstrin (DEP)	-
103381124	18.4502	74.2712	424.518	9.41313	13.3896	37.1935	172.413	19.9988	3.10453	0.000552863	0.0364648	esco2	NC_024313.1	10479349	10484554	-	2760	protein_coding	establishment of sister chromatid cohesion N-acetyltransferase 2%2C transcript variant X4 && sp|Q5SPR8|ESCO2_DANRE N-acetyltransferase ESCO2 OS=Danio rerio OX=7955 GN=esco2 PE=2 SV=1 && PF13878:zinc-finger of acetyl-transferase ESCO|PF13880:ESCO1/2 acetyl-transferase	-
103392531	0	0	0	3.13771	36.8214	2.01046	0	13.9899	-6.3398	0.000571285	0.0375434	LOC103392531	NC_024323.1	511205	547102	-	2387	protein_coding	RNA binding protein fox-1 homolog 3-like%2C transcript variant X1 && sp|Q9NWB1|RFOX1_HUMAN RNA binding protein fox-1 homolog 1 OS=Homo sapiens OX=9606 GN=RBFOX1 PE=1 SV=2 && PF00076:RNA recognition motif. (a.k.a. RRM, RBD, or RNP domain)|PF12414:Calcitonin gene-related peptide regulator C terminal	-
103381296	223.159	127.71	210.71	1895.18	347.014	297.548	187.193	846.58	-2.17724	0.000578172	0.0377664	arg2	NC_024307.1	15640955	15648757	-	2087	protein_coding	arginase 2 && sp|Q91553|ARGN1_XENLA Arginase, non-hepatic 1 OS=Xenopus laevis OX=8355 GN=arg2-a PE=2 SV=1 && PF00491:Arginase family	-
103384023	1213.32	862.271	767.438	2152.47	2541.79	1415.36	947.676	2036.54	-1.10335	0.000578843	0.0377664	LOC103384023	NC_024315.1	13526415	13536904	-	3510	protein_coding	protein transport protein Sec23B%2C transcript variant X1 && sp|Q5ZK03|SC23A_CHICK Protein transport protein Sec23A OS=Gallus gallus OX=9031 GN=SEC23A PE=2 SV=1 && PF04810:Sec23/Sec24 zinc finger|PF04815:Sec23/Sec24 helical domain|PF04811:Sec23/Sec24 trunk domain|PF08033:Sec23/Sec24 beta-sandwich domain|PF00626:Gelsolin repeat	-
103379802	36.9003	182.055	369.775	39.7443	45.7478	37.1935	196.243	40.8952	2.26198	0.000582901	0.0378948	ticrr	NC_024312.1	5212003	5222672	-	6607	protein_coding	TOPBP1 interacting checkpoint and replication regulator && sp|Q6DRL4|TICRR_DANRE Treslin OS=Danio rerio OX=7955 GN=ticrr PE=2 SV=1 && PF15292:Treslin N-terminus	-
103395505	34.2646	112.313	506.117	26.1476	45.7478	35.1831	217.565	35.6928	2.60732	0.000592692	0.0383886	mis18a	NC_024325.1	14645795	14654623	-	2556	protein_coding	MIS18 kinetochore protein A%2C transcript variant X1 && sp|Q9CZJ6|MS18A_MOUSE Protein Mis18-alpha OS=Mus musculus OX=10090 GN=Mis18a PE=2 SV=1 && PF03226:Yippee zinc-binding/DNA-binding /Mis18, centromere assembly	-
103393685	452.468	454.685	629.031	1935.97	562.364	2099.93	512.061	1532.75	-1.58206	0.000594729	0.0383886	LOC103393685	NC_024323.1	15747135	15749561	+	1948	protein_coding	transcription factor jun-B-like && sp|P79703|JUNB_CYPCA Transcription factor jun-B OS=Cyprinus carpio OX=7962 GN=junb PE=2 SV=1 && PF00170:bZIP transcription factor|PF03957:Jun-like transcription factor	TF_bZIP
103383838	294.324	249.08	203.48	515.63	384.951	667.473	248.961	522.685	-1.06965	0.000597361	0.0384218	LOC103383838	NC_024307.1	19658780	19670658	-	6034	protein_coding	protein fantom-like && sp|Q96KN7|RPGR1_HUMAN X-linked retinitis pigmentosa GTPase regulator-interacting protein 1 OS=Homo sapiens OX=9606 GN=RPGRIP1 PE=1 SV=2 && PF11618:First C2 domain of RPGR-interacting protein 1|PF18111:Retinitis pigmentosa G-protein regulator interacting C-terminal	-
103388911	7.90721	76.0827	139.44	4.18361	6.69481	16.0837	74.4768	8.98737	3.04482	0.000606631	0.0388271	mms22l	NC_024319.1	19770198	19785782	+	4046	protein_coding	MMS22 like%2C DNA repair protein%2C transcript variant X1 && sp|B3DIY3|MMS22_DANRE Protein MMS22-like OS=Danio rerio OX=7955 GN=mms22l PE=2 SV=1 && PF14911:S-phase genomic integrity recombination mediator, C-terminal|PF14910:S-phase genomic integrity recombination mediator, N-terminal	-
103388164	0	0.905746	6.19735	7.32132	311.308	139.727	2.3677	152.786	-6.03146	0.000609757	0.0388271	LOC103388164	NC_024319.1	4298470	4300022	+	925	protein_coding	jeltraxin-like && sp|Q9PTT2|JELT_LEPLA Jeltraxin OS=Lepidobatrachus laevis OX=8376 GN=PXN1 PE=1 SV=1 && PF00354:Pentaxin family	-
103383094	61.5005	31.7011	28.921	234.282	33.474	365.904	40.7075	211.22	-2.3743	0.000610085	0.0388271	LOC103383094	NC_024307.1	17898147	17901848	-	3056	protein_coding	uncharacterized LOC103383094 && sp|Q9BXL8|CDCA4_HUMAN Cell division cycle-associated protein 4 OS=Homo sapiens OX=9606 GN=CDCA4 PE=1 SV=1 && PF06031:SERTA motif	-
103382674	20.2073	22.6437	20.6578	40.7902	83.6851	65.34	21.1696	63.2718	-1.57818	0.000612675	0.0388556	LOC103382674	NC_024314.1	19232180	19236654	+	1871	protein_coding	alpha-(1%2C3)-fucosyltransferase 9-like && sp|O88819|FUT9_MOUSE 4-galactosyl-N-acetylglucosaminide 3-alpha-L-fucosyltransferase 9 OS=Mus musculus OX=10090 GN=Fut9 PE=1 SV=1 && PF00852:Glycosyltransferase family 10 (fucosyltransferase) C-term|PF17039:Fucosyltransferase, N-terminal	-
103377966	0	0	1.03289	12.5508	22.316	5.02615	0.344297	13.2977	-5.30486	0.000618762	0.0391049	LOC103377966	NC_024310.1	8767277	8774486	-	4342	protein_coding	short transient receptor potential channel 6-like && sp|Q9Y210|TRPC6_HUMAN Short transient receptor potential channel 6 OS=Homo sapiens OX=9606 GN=TRPC6 PE=1 SV=1 && PF12796:Ankyrin repeats (3 copies)|PF00520:Ion transport protein|PF08344:Transient receptor ion channel II	-
103382106	7157.78	4478.01	3527.32	15604.9	16003.9	7214.54	5054.37	12941.1	-1.35631	0.000626539	0.0394589	ace	NC_024314.1	10698348	10719068	+	6087	protein_coding	angiotensin I converting enzyme && sp|Q10751|ACE_CHICK Angiotensin-converting enzyme (Fragment) OS=Gallus gallus OX=9031 GN=ACE PE=2 SV=1 && PF01401:Angiotensin-converting enzyme	-
103389591	0.878579	19.0207	19.6249	0	0	0	13.1747	0	6.08316	0.000629471	0.0394917	hsf2bp	NC_024320.1	11369892	11374401	+	2553	protein_coding	heat shock transcription factor 2 binding protein%2C transcript variant X1 && sp|Q9D4G2|HSF2B_MOUSE Heat shock factor 2-binding protein OS=Mus musculus OX=10090 GN=Hsf2bp PE=1 SV=1 && -	-
103389382	11.4215	103.255	413.157	12.5508	24.5476	28.1465	175.944	21.7483	3.01503	0.000631414	0.0394917	ndc80	NC_024307.1	28464580	28470411	-	2200	protein_coding	NDC80%2C kinetochore complex component && sp|Q6DRJ7|NDC80_DANRE Kinetochore protein NDC80 homolog OS=Danio rerio OX=7955 GN=ndc80 PE=2 SV=1 && PF18077:Domain of unknown function (DUF5595)|PF03801:HEC/Ndc80p family	-
103381695	236.338	499.066	406.959	151.656	129.433	200.041	380.788	160.377	1.24655	0.000636514	0.0395831	LOC103381695	NC_024314.1	5076756	5105436	+	5214	protein_coding	uncharacterized LOC103381695%2C transcript variant X2 && - && -	-
103392411	278.51	178.432	108.454	612.899	576.869	325.695	188.465	505.154	-1.42089	0.00063724	0.0395831	LOC103392411	NC_024322.1	16383793	16387177	+	1920	protein_coding	G-protein coupled receptor 39 && sp|B4XF06|GPR39_BOVIN G-protein coupled receptor 39 OS=Bos taurus OX=9913 GN=GPR39 PE=2 SV=1 && PF00001:7 transmembrane receptor (rhodopsin family)	-
103385219	66.772	80.6114	72.3024	25.1017	8.92641	32.1674	73.2286	22.0652	1.72416	0.000646931	0.0399117	LOC103385219	NC_024316.1	14650999	14653268	-	1064	pseudogene	- && sp|P68365|TBA1C_CRIGR Tubulin alpha-1C chain OS=Cricetulus griseus OX=10029 GN=TUBA1C PE=2 SV=1 && PF03953:Tubulin C-terminal domain|PF00091:Tubulin/FtsZ family, GTPase domain	-
103392741	43.929	130.427	119.815	280.302	214.234	331.726	98.0573	275.421	-1.49175	0.000659204	0.040531	LOC103392741	NC_024323.1	3929573	3934549	-	1791	protein_coding	ADP-ribosylation factor-like protein 5B && sp|Q96KC2|ARL5B_HUMAN ADP-ribosylation factor-like protein 5B OS=Homo sapiens OX=9606 GN=ARL5B PE=1 SV=1 && PF00025:ADP-ribosylation factor family	-
103388101	160.78	184.772	200.381	644.276	2087.66	124.649	181.978	952.196	-2.38745	0.000669216	0.0410076	tm4sf5	NC_024307.1	27196883	27201419	-	1089	protein_coding	transmembrane 4 L six family member 5 && sp|Q2KIG8|T4S5_BOVIN Transmembrane 4 L6 family member 5 OS=Bos taurus OX=9913 GN=TM4SF5 PE=2 SV=1 && PF05805:L6 membrane protein	-
103389722	11.4215	19.0207	170.427	4.18361	10.0422	7.03661	66.9564	7.08748	3.23993	0.000672364	0.0410618	cenpl	NC_024320.1	14668123	14670471	+	1244	protein_coding	centromere protein L && sp|Q6DRD4|CENPL_DANRE Centromere protein L OS=Danio rerio OX=7955 GN=cenpl PE=2 SV=1 && PF13092:Kinetochore complex Sim4 subunit Fta1	-
103387968	712.528	844.156	544.334	437.188	198.613	256.334	700.339	297.378	1.23567	0.00067721	0.0410811	p3h3	NC_024319.1	1917176	1923271	+	2849	protein_coding	prolyl 3-hydroxylase 3 && sp|Q8IVL5|P3H2_HUMAN Prolyl 3-hydroxylase 2 OS=Homo sapiens OX=9606 GN=P3H2 PE=1 SV=1 && PF13640:2OG-Fe(II) oxygenase superfamily	-
103396026	136.18	141.296	96.0589	34.5148	27.895	69.3609	124.512	43.9236	1.50054	0.000683105	0.0413005	LOC103396026	NC_024326.1	3057260	3204020	-	5945	protein_coding	ephrin type-B receptor 1-B%2C transcript variant X1 && sp|P09759|EPHB1_RAT Ephrin type-B receptor 1 OS=Rattus norvegicus OX=10116 GN=Ephb1 PE=1 SV=2 && PF14575:Ephrin type-A receptor 2 transmembrane domain|PF07647:SAM domain (Sterile alpha motif)|PF00041:Fibronectin type III domain|PF07714:Protein tyrosine kinase|PF01404:Ephrin receptor ligand binding domain	-
103378234	1519.94	345.089	520.577	5447.06	5110.37	829.315	795.203	3795.58	-2.25477	0.000688441	0.0414849	slc13a5	NC_024310.1	14027474	14036407	+	1962	protein_coding	solute carrier family 13 member 5 && sp|Q86YT5|S13A5_HUMAN Solute carrier family 13 member 5 OS=Homo sapiens OX=9606 GN=SLC13A5 PE=1 SV=1 && PF00939:Sodium:sulfate symporter transmembrane region	-
103396434	436.654	551.6	491.656	292.853	128.317	230.198	493.303	217.123	1.18317	0.000730821	0.0437369	LOC103396434	NC_024326.1	9214259	9230654	-	3801	protein_coding	EMILIN-2-like%2C transcript variant X2 && sp|Q9BXX0|EMIL2_HUMAN EMILIN-2 OS=Homo sapiens OX=9606 GN=EMILIN2 PE=1 SV=3 && PF07546:EMI domain|PF00386:C1q domain	-
103377189	29.8717	90.5746	307.802	15.6885	18.9686	40.2092	142.749	24.9555	2.51264	0.000740413	0.0437369	plk4	NC_024307.1	6602793	6609956	-	3325	protein_coding	polo like kinase 4 && sp|Q7ZVS3|PLK4_DANRE Serine/threonine-protein kinase PLK4 OS=Danio rerio OX=7955 GN=plk4 PE=2 SV=2 && PF00069:Protein kinase domain|PF18190:Polo-like Kinase 4 Polo Box 1|PF00659:POLO box duplicated region|PF18409:Polo-like Kinase 4 Polo Box 2	-
103383173	5.27148	15.3977	86.7629	1.0459	0	5.02615	35.8107	2.02402	4.11886	0.00074396	0.0437369	LOC103383173	NC_024315.1	52643	57581	-	1668	protein_coding	rho GTPase-activating protein 19-like && sp|Q6INE5|RHG19_XENLA Rho GTPase-activating protein 19 OS=Xenopus laevis OX=8355 GN=arhgap19 PE=2 SV=1 && PF00620:RhoGAP domain	-
103388309	76.4364	51.6275	49.5788	21.964	4.4632	1.00523	59.2142	9.14413	2.69572	0.000744308	0.0437369	LOC103388309	NC_024319.1	5776092	5786428	-	3076	protein_coding	B-cell receptor CD22-like%2C transcript variant X1 && sp|P35329|CD22_MOUSE B-cell receptor CD22 OS=Mus musculus OX=10090 GN=Cd22 PE=1 SV=1 && PF13895:Immunoglobulin domain|PF13927:Immunoglobulin domain	-
103379012	151.994	94.1976	133.243	859.732	463.057	124.649	126.478	482.479	-1.93148	0.000746741	0.0437369	LOC103379012	NC_024311.1	10233137	10241850	+	4278	protein_coding	phosphatidate phosphatase LPIN1-like%2C transcript variant X1 && sp|Q91ZP3|LPIN1_MOUSE Phosphatidate phosphatase LPIN1 OS=Mus musculus OX=10090 GN=Lpin1 PE=1 SV=1 && PF08235:LNS2 (Lipin/Ned1/Smp2)|PF16876:Lipin/Ned1/Smp2 multi-domain protein middle domain|PF04571:lipin, N-terminal conserved region	-
103387578	2128.8	1950.98	622.833	4097.85	5583.47	3578.62	1567.54	4419.98	-1.49533	0.000748537	0.0437369	LOC103387578	NC_024318.1	12776561	12778710	-	1129	protein_coding	group XIIB secretory phospholipase A2-like protein%2C transcript variant X1 && sp|Q9BX93|PG12B_HUMAN Group XIIB secretory phospholipase A2-like protein OS=Homo sapiens OX=9606 GN=PLA2G12B PE=1 SV=2 && PF06951:Group XII secretory phospholipase A2 precursor (PLA2G12)	-
103393985	58490.5	37801.3	16188.5	85120.8	113220	108013	37493.5	102118	-1.44552	0.000749927	0.0437369	LOC103393985	NC_024324.1	2430728	2433296	+	1144	protein_coding	apolipoprotein Eb-like && sp|O42364|APOEB_DANRE Apolipoprotein Eb OS=Danio rerio OX=7955 GN=apoeb PE=2 SV=1 && PF01442:Apolipoprotein A1/A4/E domain	-
103391963	10.543	45.2873	97.0918	8.36723	6.69481	9.04708	50.974	8.03637	2.65989	0.00075893	0.0440049	cenpj	NC_024322.1	8778057	8787135	-	4601	protein_coding	centromere protein J%2C transcript variant X1 && sp|Q9HC77|CENPJ_HUMAN Centromere protein J OS=Homo sapiens OX=9606 GN=CENPJ PE=1 SV=2 && PF07202:T-complex protein 10 C-terminus	-
103378927	276.752	149.448	225.17	746.775	1070.05	251.308	217.124	689.379	-1.66649	0.000759374	0.0440049	LOC103378927	NC_024311.1	8197233	8214356	+	4909	protein_coding	ceramide synthase 2%2C transcript variant X2 && sp|Q8NG48|LINES_HUMAN Protein Lines homolog 1 OS=Homo sapiens OX=9606 GN=LINS1 PE=2 SV=2 && PF14695:Lines C-terminus|PF14694:Lines N-terminus	-
103392600	982.252	1277.1	964.721	602.44	219.813	486.532	1074.69	436.262	1.3003	0.000769055	0.0444239	kank2	NC_024323.1	1473313	1501775	+	5238	protein_coding	KN motif and ankyrin repeat domains 2 && sp|X1WE18|KANK2_DANRE KN motif and ankyrin repeat domain-containing protein 2 OS=Danio rerio OX=7955 GN=kank2 PE=3 SV=1 && PF13857:Ankyrin repeats (many copies)|PF12075:KN motif	-
103391769	450.711	219.191	296.44	744.683	748.702	593.086	322.114	695.491	-1.10996	0.000778739	0.0447355	LOC103391769	NC_024322.1	3763321	3780552	-	7253	protein_coding	kalirin-like%2C transcript variant X1 && sp|O60229|KALRN_HUMAN Kalirin OS=Homo sapiens OX=9606 GN=KALRN PE=1 SV=3 && PF00069:Protein kinase domain|PF07679:Immunoglobulin I-set domain|PF00621:RhoGEF domain|PF00041:Fibronectin type III domain|PF16609:SH3-RhoGEF linking unstructured region	-
103383565	11.4215	21.7379	28.921	48.1115	64.7165	85.4446	20.6935	66.0909	-1.68331	0.000779381	0.0447355	c9h19orf67	NC_024315.1	5896344	5900928	+	2576	protein_coding	chromosome 9 C19orf67 homolog%2C transcript variant X1 && sp|A3KNM4|CS067_DANRE UPF0575 protein C19orf67 homolog OS=Danio rerio OX=7955 GN=si:ch211-214c7.5 PE=2 SV=1 && PF11771:Protein of unknown function (DUF3314)	-
103382720	459.497	1060.63	610.439	190.354	131.665	392.04	710.188	238.02	1.57643	0.000783708	0.044842	LOC103382720	NC_024314.1	19865787	19900987	-	4112	protein_coding	fatty acyl-CoA reductase 1-like && sp|Q5ZM72|FACR1_CHICK Fatty acyl-CoA reductase 1 OS=Gallus gallus OX=9031 GN=FAR1 PE=2 SV=1 && PF03015:Male sterility protein|PF07993:Male sterility protein	-
112487521	22.8431	19.0207	15.4934	2.09181	0	4.02092	19.119	2.03758	3.20364	0.00079087	0.0451095	LOC112487521	NC_024315.1	2424445	2424660	+	152	lncRNA	uncharacterized LOC112487521 && - && -	-
103390410	130.03	110.501	93.9931	490.529	152.865	285.486	111.508	309.626	-1.473	0.000803092	0.0456629	LOC103390410	NC_024320.1	27422549	27431074	+	4466	protein_coding	probetacellulin-like%2C transcript variant X1 && sp|Q05928|BTC_MOUSE Probetacellulin OS=Mus musculus OX=10090 GN=Btc PE=1 SV=1 && -	-
103388690	130.908	128.616	127.046	788.611	228.739	221.151	128.857	412.834	-1.67983	0.000808962	0.0457101	prdm1	NC_024319.1	14881269	14901824	+	4788	protein_coding	PR/SET domain 1%2C transcript variant X1 && sp|O75626|PRDM1_HUMAN PR domain zinc finger protein 1 OS=Homo sapiens OX=9606 GN=PRDM1 PE=1 SV=2 && PF00856:SET domain	zf-C2H2
103381814	9037.07	12524.7	5230.56	4982.68	2204.82	3181.56	8930.76	3456.35	1.36953	0.000828031	0.0466056	LOC103381814	NC_024314.1	6967313	6982392	-	4909	protein_coding	collagen alpha-1(I) chain-like && sp|P02457|CO1A1_CHICK Collagen alpha-1(I) chain OS=Gallus gallus OX=9031 GN=COL1A1 PE=1 SV=3 && PF00093:von Willebrand factor type C domain|PF01391:Collagen triple helix repeat (20 copies)|PF01410:Fibrillar collagen C-terminal domain	-
103393949	177106	105934	86371.4	195879	329487	314777	123137	280048	-1.1854	0.000835664	0.0467817	LOC103393949	NC_024324.1	2424164	2425614	-	1028	protein_coding	apolipoprotein A-IV-like && - && PF01442:Apolipoprotein A1/A4/E domain	-
103383798	0	0	0	62.7542	270.024	1.00523	0	111.261	-9.33458	0.000844078	0.0469629	LOC103383798	NC_024315.1	9243005	9250406	-	3143	protein_coding	sodium-dependent phosphate transport protein 2B-like && sp|Q27960|NPT2B_BOVIN Sodium-dependent phosphate transport protein 2B OS=Bos taurus OX=9913 GN=SLC34A2 PE=1 SV=1 && PF02690:Na+/Pi-cotransporter	-
107989125	187.137	182.055	193.151	450.784	526.658	251.308	187.448	409.583	-1.12727	0.000848815	0.047082	LOC107989125	NC_024316.1	7018959	7020049	-	493	lncRNA	uncharacterized LOC107989125 && - && -	-
103384125	0	0	0	1.0459	80.3377	108.565	0	63.3162	-8.52145	0.000857359	0.0474109	LOC103384125	NC_024315.1	15700141	15706309	-	2007	protein_coding	sialic acid synthase-like && sp|Q9NR45|SIAS_HUMAN Sialic acid synthase OS=Homo sapiens OX=9606 GN=NANS PE=1 SV=2 && PF08666:SAF domain|PF03102:NeuB family	-
103393458	45.6861	140.391	77.4669	237.42	158.444	500.605	87.8479	298.823	-1.76665	0.000862618	0.0475567	LOC103393458	NC_024323.1	13382610	13386729	-	2431	protein_coding	heat shock 70 kDa protein 1 && sp|Q9I8F9|HSP71_ORYLA Heat shock 70 kDa protein 1 OS=Oryzias latipes OX=8090 PE=3 SV=1 && PF00012:Hsp70 protein	-
103376976	77.315	374.073	740.583	65.8919	80.3377	125.654	397.324	90.6278	2.13132	0.000877867	0.0479601	pola1	NC_024309.1	5143720	5201242	+	5514	protein_coding	DNA polymerase alpha 1%2C catalytic subunit%2C transcript variant X1 && sp|Q9DE46|DPOLA_XENLA DNA polymerase alpha catalytic subunit OS=Xenopus laevis OX=8355 GN=pola1 PE=1 SV=1 && PF12254:DNA polymerase alpha subunit p180 N terminal|PF08996:DNA Polymerase alpha zinc finger|PF00136:DNA polymerase family B|PF03104:DNA polymerase family B, exonuclease domain	-
103399007	697.592	1073.31	834.576	1311.56	1726.14	3533.39	868.493	2190.36	-1.33466	0.000885084	0.0481668	LOC103399007	NW_007585280.1	5	6502	-	5126	protein_coding	uncharacterized LOC103399007 && sp|O92815|POL_WDSV Gag-Pol polyprotein OS=Walleye dermal sarcoma virus OX=39720 GN=gag-pol PE=1 SV=2 && PF17919:RNase H-like domain found in reverse transcriptase|PF00075:RNase H|PF00077:Retroviral aspartyl protease|PF00665:Integrase core domain|PF00078:Reverse transcriptase (RNA-dependent DNA polymerase)	-
103387978	1411.88	2966.32	1736.29	1120.16	318.003	634.301	2038.16	690.822	1.56075	0.000887083	0.0481668	tubb	NC_024319.1	1760569	1765530	-	1597	protein_coding	tubulin beta class I%2C transcript variant X1 && sp|Q91575|TBB5_XENLA Tubulin beta chain OS=Xenopus laevis OX=8355 GN=tubb PE=2 SV=1 && PF00091:Tubulin/FtsZ family, GTPase domain|PF03953:Tubulin C-terminal domain	-
103391634	4.3929	13.5862	56.809	1.0459	2.2316	2.01046	24.9294	1.76266	3.81941	0.000889952	0.0481668	LOC103391634	NC_024322.1	2437497	2441367	-	3123	protein_coding	gastrula zinc finger protein XlCGF57.1-like%2C transcript variant X1 && - && -	zf-C2H2
103383753	20.2073	55.2505	149.769	7.32132	21.2002	12.0628	75.0757	13.5281	2.47343	0.000893516	0.0481668	cenpm	NC_024315.1	8969188	8994331	+	2233	protein_coding	centromere protein M%2C transcript variant X2 && sp|Q7ZZC6|CENPM_DANRE Centromere protein M OS=Danio rerio OX=7955 GN=cenpm PE=2 SV=1 && PF11111:Centromere protein M (CENP-M)	-
103379089	5433.13	3285.14	3587.23	8006.39	11031.9	6527.97	4101.84	8522.09	-1.05488	0.000894928	0.0481668	LOC103379089	NC_024311.1	11976793	11979811	+	1169	protein_coding	nicotinamide riboside kinase 2-like%2C transcript variant X1 && sp|Q9NPI5|NRK2_HUMAN Nicotinamide riboside kinase 2 OS=Homo sapiens OX=9606 GN=NMRK2 PE=1 SV=1 && PF13238:AAA domain	-
103395612	180.987	759.921	1152.71	94.1313	103.769	295.538	697.872	164.48	2.08421	0.00092318	0.0495403	uhrf1	NC_024308.1	6824831	6833019	+	3704	protein_coding	ubiquitin like with PHD and ring finger domains 1 && sp|E7EZF3|UHRF1_DANRE E3 ubiquitin-protein ligase UHRF1 OS=Danio rerio OX=7955 GN=uhrf1 PE=1 SV=1 && PF00240:Ubiquitin family|PF00628:PHD-finger|PF02182:SAD/SRA domain|PF12148:Tandem tudor domain within UHRF1	-
novel.450	2.63574	1.81149	5.16446	33.4689	54.6742	4.02092	3.2039	30.7214	-3.27367	0.000929373	0.0496725	-	NC_024320.1	9907997	9910138	+	2142	-	- && - && -	-

## Sheet: S VS C
Gene_id	S_1	S_2	S_3	C_1	C_2	C_3	S	C	log2FoldChange	pvalue	padj	gene_name	gene_chr	gene_start	gene_end	gene_strand	gene_length	gene_biotype	gene_description	Family
103388082	1114.1	917.849	743.296	22.9365	30.8852	30.0855	925.08	27.9691	5.04911	3.29e-55	5.95e-51	LOC103388082	NC_024319.1	3351543	3352665	+	620	protein_coding	hepcidin && sp|P82951|HEPC_MORCS Hepcidin OS=Morone chrysops x Morone saxatilis OX=45352 GN=hamp PE=1 SV=1 && -	-
103379671	29.8027	40.4339	49.305	1908.94	1377.25	1132.22	39.8472	1472.8	-5.20983	1.04e-52	9.41e-49	LOC103379671	NC_024312.1	4222940	4226832	-	2555	protein_coding	beta-1%2C3-galactosyltransferase 2-like && sp|O54905|B3GT2_MOUSE Beta-1,3-galactosyltransferase 2 OS=Mus musculus OX=10090 GN=B3galt2 PE=1 SV=2 && PF01762:Galactosyltransferase	-
103386213	4.38276	4.04339	3.72113	1941.26	2428.49	786.233	4.04909	1718.66	-8.72786	1.43e-47	8.59e-44	LOC103386213	NC_024317.1	8389244	8396421	-	1651	protein_coding	solute carrier family 2%2C facilitated glucose transporter member 9-like && sp|Q3T9X0|GTR9_MOUSE Solute carrier family 2, facilitated glucose transporter member 9 OS=Mus musculus OX=10090 GN=Slc2a9 PE=1 SV=1 && PF00083:Sugar (and other) transporter	-
103386813	4714.09	3878.62	4112.78	398.261	525.049	411.168	4235.16	444.826	3.25172	7.83e-45	3.54e-41	LOC103386813	NC_024317.1	20080293	20098281	+	1816	protein_coding	membrane-spanning 4-domains subfamily A member 4D-like%2C transcript variant X1 && - && PF04103:CD20-like family	-
103382331	12004.4	25131.7	14491	105.299	212.765	43.1225	17209	120.396	7.16115	4.68e-40	1.69e-36	LOC103382331	NC_024314.1	13445740	13449122	-	2232	protein_coding	neutrophil cytosol factor 1-like && sp|Q09014|NCF1_MOUSE Neutrophil cytosol factor 1 OS=Mus musculus OX=10090 GN=Ncf1 PE=1 SV=3 && PF14604:Variant SH3 domain|PF00787:PX domain	-
103395823	21483.4	19199	15707.8	1434.57	1949.2	1229.49	18796.7	1537.76	3.61178	5.06e-39	1.52e-35	LOC103395823	NC_024326.1	313365	315883	+	1145	protein_coding	peroxiredoxin-1%2C transcript variant X2 && sp|P0CB50|PRDX1_CHICK Peroxiredoxin-1 OS=Gallus gallus OX=9031 GN=PRDX1 PE=1 SV=1 && PF00578:AhpC/TSA family|PF10417:C-terminal domain of 1-Cys peroxiredoxin	-
103390913	6636.37	7606.62	11236.9	542.136	395.789	298.849	8493.29	412.258	4.3648	3.43e-38	8.87e-35	slc43a3	NC_024321.1	9807408	9815892	-	2701	protein_coding	solute carrier family 43 member 3%2C transcript variant X4 && sp|Q1JPD8|S43A3_BOVIN Solute carrier family 43 member 3 OS=Bos taurus OX=9913 GN=SLC43A3 PE=2 SV=1 && PF07690:Major Facilitator Superfamily	-
103379397	1981.01	1981.26	2147.09	411.815	375.198	398.131	2036.45	395.048	2.36573	3.78e-35	8.55e-32	LOC103379397	NC_024307.1	11316099	11318903	-	1250	protein_coding	tetraspanin-3-like%2C transcript variant X1 && sp|Q32KU6|TSN6_BOVIN Tetraspanin-6 OS=Bos taurus OX=9913 GN=TSPAN6 PE=2 SV=1 && PF00335:Tetraspanin family	-
103391192	1269.25	1480.89	413.976	10.4257	20.5902	5.01424	1054.7	12.01	6.46906	4.62e-27	9.27e-24	LOC103391192	NC_024321.1	15072873	15084370	-	3457	protein_coding	uncharacterized LOC103391192 && sp|P45831|TSAC_MYCLE Putative threonylcarbamoyl-AMP synthase OS=Mycobacterium leprae (strain TN) OX=272631 GN=ML1136 PE=3 SV=1 && PF01300:Telomere recombination	-
103387248	639.006	622.681	662.361	129.279	136.124	118.336	641.349	127.913	2.32692	5.2e-26	9.4e-23	capg	NC_024307.1	25600239	25608825	-	1550	protein_coding	capping actin protein%2C gelsolin like && sp|Q6AYC4|CAPG_RAT Macrophage-capping protein OS=Rattus norvegicus OX=10116 GN=Capg PE=1 SV=1 && PF00626:Gelsolin repeat	-
112486244	146.384	141.519	92.098	862.204	905.967	950.701	126.667	906.291	-2.83902	2.97e-25	4.88e-22	LOC112486244	NC_024325.1	12388711	12395361	-	2065	protein_coding	ubiquitin carboxyl-terminal hydrolase 2-like && sp|O75604|UBP2_HUMAN Ubiquitin carboxyl-terminal hydrolase 2 OS=Homo sapiens OX=9606 GN=USP2 PE=1 SV=2 && PF00443:Ubiquitin carboxyl-terminal hydrolase	-
103391172	16999	10374.3	6258.94	136.576	419.81	107.305	11210.7	221.231	5.66424	6.32e-24	9.52e-21	LOC103391172	NC_024321.1	15063722	15065294	-	881	protein_coding	ES1 protein homolog%2C mitochondrial-like%2C transcript variant X1 && sp|F1QCN0|GAL3A_DANRE Glutamine amidotransferase-like class 1 domain-containing protein 3A, mitochondrial OS=Danio rerio OX=7955 GN=gatd3a PE=3 SV=1 && PF01965:DJ-1/PfpI family	-
103389033	624.104	301.232	920.98	27.1068	17.1585	22.0627	615.439	22.1093	4.79655	1.07e-23	1.49e-20	ccnb1	NC_024320.1	509368	512948	-	1698	protein_coding	cyclin B1 && sp|Q9DGA4|CCNB1_ORYCU G2/mitotic-specific cyclin-B1 OS=Oryzias curvinotus OX=104658 GN=ccnb1 PE=2 SV=1 && PF00134:Cyclin, N-terminal domain|PF02984:Cyclin, C-terminal domain	-
103386586	1475.24	1084.64	3959.28	64.6393	40.0364	20.057	2173.05	41.5775	5.70858	1.95e-23	2.51e-20	cd55	NC_024317.1	16003384	16013683	-	2127	protein_coding	CD55 molecule (Cromer blood group)%2C transcript variant X1 && sp|Q09101|HIG_DROME Locomotion-related protein Hikaru genki OS=Drosophila melanogaster OX=7227 GN=hig PE=1 SV=2 && PF00084:Sushi repeat (SCR repeat)	-
103379132	5711.61	3904.9	10580.1	412.857	175.016	264.752	6732.2	284.209	4.56567	2.23e-23	2.69e-20	hk1	NC_024311.1	12950510	12966262	+	3246	protein_coding	hexokinase 1 && sp|P19367|HXK1_HUMAN Hexokinase-1 OS=Homo sapiens OX=9606 GN=HK1 PE=1 SV=3 && PF00349:Hexokinase|PF03727:Hexokinase	-
103399918	2857.56	620.66	553.518	20.8514	11.439	10.0285	1343.91	14.1063	6.57339	8.87e-23	1e-19	LOC103399918	NC_024308.1	14651956	14653855	+	1033	protein_coding	serine protease 57-like%2C transcript variant X2 && sp|Q6IE59|PRS57_RAT Serine protease 57 OS=Rattus norvegicus OX=10116 GN=Prss57 PE=2 SV=2 && PF00089:Trypsin	-
103379066	7169.31	8159.55	8383.7	30720.3	28312.6	26460.2	7904.19	28497.7	-1.85017	1.25e-21	1.33e-18	LOC103379066	NC_024307.1	11360486	11370312	+	2717	protein_coding	plastin-1-like && sp|Q14651|PLSI_HUMAN Plastin-1 OS=Homo sapiens OX=9606 GN=PLS1 PE=1 SV=2 && PF00307:Calponin homology (CH) domain|PF13499:EF-hand domain pair	-
103389132	717.895	1076.55	664.222	91.746	58.3388	103.293	819.556	84.4594	3.2758	2.6e-21	2.61e-18	LOC103389132	NC_024320.1	2725674	2736800	+	1306	protein_coding	programmed cell death 1 ligand 1-like%2C transcript variant X1 && - && PF07686:Immunoglobulin V-set domain	-
103399193	687.216	782.395	743.296	128.236	175.016	157.447	737.636	153.567	2.26481	7.33e-21	6.97e-18	LOC103399193	NW_007586173.1	7	1016	-	493	protein_coding	thioredoxin reductase 1%2C cytoplasmic-like && sp|O89049|TRXR1_RAT Thioredoxin reductase 1, cytoplasmic OS=Rattus norvegicus OX=10116 GN=Txnrd1 PE=1 SV=5 && PF02852:Pyridine nucleotide-disulphide oxidoreductase, dimerisation domain	-
103395935	85.0255	42.4556	63.2592	787.139	2219.16	956.718	63.5801	1321.01	-4.37471	1.85e-20	1.67e-17	LOC103395935	NC_024326.1	1914146	1928158	-	6890	protein_coding	cyclic AMP-responsive element-binding protein 3-like protein 3-B%2C transcript variant X1 && sp|Q1LYG4|CR3LB_DANRE Cyclic AMP-responsive element-binding protein 3-like protein 3-B OS=Danio rerio OX=7955 GN=creb3l3b PE=3 SV=2 && PF00170:bZIP transcription factor	TF_bZIP
103384540	5240.9	2295.63	2774.1	177.237	298.557	309.88	3436.88	261.891	3.71423	2.51e-20	2.16e-17	LOC103384540	NC_024316.1	2290811	2291836	-	578	protein_coding	mannose-specific lectin-like%2C transcript variant X1 && - && -	-
103378564	553.104	333.579	814.927	28.1494	36.6047	48.1367	567.204	37.6303	3.91289	3.5e-20	2.87e-17	numa1	NC_024310.1	19179173	19191718	-	7539	protein_coding	nuclear mitotic apparatus protein 1 && sp|E9Q7G0|NUMA1_MOUSE Nuclear mitotic apparatus protein 1 OS=Mus musculus OX=10090 GN=Numa1 PE=1 SV=1 && -	-
103398141	446.165	576.183	574.915	2542.82	2158.53	2134.06	532.421	2278.47	-2.09781	5.31e-20	4.17e-17	LOC103398141	NC_024328.1	16096795	16132440	-	1500	protein_coding	PDZ and LIM domain protein 2-like && sp|Q6AYD6|PDLI2_RAT PDZ and LIM domain protein 2 OS=Rattus norvegicus OX=10116 GN=Pdlim2 PE=1 SV=1 && PF15936:Domain of unknown function (DUF4749)|PF00412:LIM domain|PF00595:PDZ domain	-
103384894	1359.53	181.952	774.925	13.5534	3.43169	6.01709	772.136	7.66739	6.64781	9.29e-20	6.73e-17	LOC103384894	NC_024316.1	7850840	7853189	-	1261	protein_coding	uncharacterized LOC103384894 && - && -	-
103386401	14.9014	33.3579	13.9542	356.558	415.235	237.675	20.7378	336.489	-4.02895	9.31e-20	6.73e-17	LOC103386401	NC_024317.1	12452353	12465849	-	1909	protein_coding	sterol O-acyltransferase 2-like && sp|Q7TQM4|SOAT2_RAT Sterol O-acyltransferase 2 OS=Rattus norvegicus OX=10116 GN=Soat2 PE=2 SV=1 && -	-
103386889	213.002	128.378	257.688	12.5108	11.439	9.02564	199.689	10.9918	4.18645	1.67e-19	1.16e-16	LOC103386889	NC_024307.1	3885866	3893920	+	3992	protein_coding	rho GTPase-activating protein 11A && sp|Q80Y19|RHGBA_MOUSE Rho GTPase-activating protein 11A OS=Mus musculus OX=10090 GN=Arhgap11a PE=1 SV=2 && PF00620:RhoGAP domain	-
103384521	1960.84	2757.59	1281	160.556	209.333	92.2621	1999.81	154.05	3.69963	2.57e-19	1.72e-16	LOC103384521	NC_024316.1	2033284	2043753	-	2493	protein_coding	transketolase && sp|P29401|TKT_HUMAN Transketolase OS=Homo sapiens OX=9606 GN=TKT PE=1 SV=3 && PF02780:Transketolase, C-terminal domain|PF00456:Transketolase, thiamine diphosphate binding domain|PF02779:Transketolase, pyrimidine binding domain	-
103391376	270.854	221.375	195.359	1301.13	1348.66	974.769	229.196	1208.18	-2.39753	2.66e-19	1.72e-16	eif4ebp3	NC_024321.1	18665851	18669657	-	1157	protein_coding	eukaryotic translation initiation factor 4E binding protein 3 && sp|Q98TT6|4EB3L_DANRE Eukaryotic translation initiation factor 4E-binding protein 3-like OS=Danio rerio OX=7955 GN=eif4ebp3l PE=1 SV=1 && PF05456:Eukaryotic translation initiation factor 4E binding protein (EIF4EBP)	-
103389400	2526.22	2709.07	2853.18	842.395	887.664	850.416	2696.16	860.159	1.64828	5.01e-19	3.12e-16	LOC103389400	NC_024320.1	6721387	6743491	-	5066	protein_coding	sarcoplasmic/endoplasmic reticulum calcium ATPase 2 && sp|P11507|AT2A2_RAT Sarcoplasmic/endoplasmic reticulum calcium ATPase 2 OS=Rattus norvegicus OX=10116 GN=Atp2a2 PE=1 SV=1 && PF00689:Cation transporting ATPase, C-terminus|PF13246:Cation transport ATPase (P-type)|PF00122:E1-E2 ATPase|PF00690:Cation transporter/ATPase, N-terminus	-
103386368	146.384	228.451	295.83	15.6385	11.439	17.0484	223.555	14.7086	3.92014	5.33e-19	3.21e-16	poc1a	NC_024317.1	12062706	12097535	-	3634	protein_coding	POC1 centriolar protein A%2C transcript variant X3 && sp|Q7ZVF0|POC1A_DANRE POC1 centriolar protein homolog A OS=Danio rerio OX=7955 GN=poc1a PE=2 SV=1 && PF00400:WD domain, G-beta repeat	-
103386336	5795.76	8455.73	5844.96	1219.81	1507.66	1401.98	6698.82	1376.48	2.28294	1.03e-18	6.01e-16	LOC103386336	NC_024317.1	11331619	11342092	-	1849	protein_coding	thioredoxin reductase 1%2C cytoplasmic-like && sp|Q99MD6|TRXR3_MOUSE Thioredoxin reductase 3 OS=Mus musculus OX=10090 GN=Txnrd3 PE=1 SV=3 && PF00462:Glutaredoxin|PF02852:Pyridine nucleotide-disulphide oxidoreductase, dimerisation domain|PF07992:Pyridine nucleotide-disulphide oxidoreductase	-
103380463	17063.8	13213.8	15625	3433.18	4389.13	4018.41	15300.9	3946.91	1.95487	3.47e-18	1.96e-15	sqor	NC_024312.1	16562707	16567187	+	2278	protein_coding	sulfide quinone oxidoreductase && sp|Q9Y6N5|SQOR_HUMAN Sulfide:quinone oxidoreductase, mitochondrial OS=Homo sapiens OX=9606 GN=SQOR PE=1 SV=1 && PF07992:Pyridine nucleotide-disulphide oxidoreductase	-
103380282	326.954	210.256	448.396	32.3196	32.0291	31.0883	328.535	31.8124	3.36903	5.19e-18	2.84e-15	incenp	NC_024312.1	13142345	13151286	+	3041	protein_coding	inner centromere protein && sp|Q0IHP2|INCE_XENTR Inner centromere protein OS=Xenopus tropicalis OX=8364 GN=incenp PE=2 SV=1 && PF12178:Chromosome passenger complex (CPC) protein INCENP N terminal|PF03941:Inner centromere protein, ARK binding region	-
103391928	756.464	588.313	885.629	147.002	161.29	120.342	743.468	142.878	2.38078	2.98e-17	1.58e-14	uchl3	NC_024322.1	8140914	8143704	+	991	protein_coding	ubiquitin C-terminal hydrolase L3 && sp|Q9JKB1|UCHL3_MOUSE Ubiquitin carboxyl-terminal hydrolase isozyme L3 OS=Mus musculus OX=10090 GN=Uchl3 PE=1 SV=2 && PF01088:Ubiquitin carboxyl-terminal hydrolase, family 1	-
103390609	315.558	161.735	467.002	12.5108	20.5902	20.057	314.765	17.7193	4.15273	3.4e-17	1.76e-14	LOC103390609	NC_024321.1	2902919	2905763	-	1420	protein_coding	aurora kinase B-like && sp|Q6NW76|AURKB_DANRE Aurora kinase B OS=Danio rerio OX=7955 GN=aurkb PE=2 SV=1 && PF00069:Protein kinase domain	-
103389096	286.632	258.777	338.623	60.469	56.051	47.1339	294.677	54.5513	2.43477	4.87e-17	2.45e-14	LOC103389096	NC_024320.1	2288370	2299696	+	1422	protein_coding	histone H3-like centromeric protein A%2C transcript variant X4 && sp|Q803H4|CENPA_DANRE Histone H3-like centromeric protein A OS=Danio rerio OX=7955 GN=cenpa PE=1 SV=1 && PF00125:Core histone H2A/H2B/H3/H4	-
103384869	441.782	248.668	611.196	42.7453	42.3242	39.1111	433.882	41.3935	3.39059	5.37e-17	2.62e-14	LOC103384869	NC_024316.1	7866673	7872276	+	2557	protein_coding	targeting protein for Xklp2-like%2C transcript variant X1 && sp|Q6DDV8|TPX2B_XENLA Targeting protein for Xklp2-B OS=Xenopus laevis OX=8355 GN=tpx2-b PE=2 SV=1 && PF12214:Cell cycle regulated microtubule associated protein|PF06886:Targeting protein for Xklp2 (TPX2)	-
103380705	348.867	600.443	356.298	2911.89	2802.55	2196.24	435.203	2636.89	-2.59969	6.24e-17	2.97e-14	LOC103380705	NC_024313.1	2407155	2411279	-	2188	protein_coding	cholesterol 24-hydroxylase && sp|Q9WVK8|CP46A_MOUSE Cholesterol 24-hydroxylase OS=Mus musculus OX=10090 GN=Cyp46a1 PE=1 SV=1 && PF00067:Cytochrome P450	-
103380616	274.361	233.506	508.864	20.8514	28.5974	34.0969	338.91	27.8486	3.60468	6.83e-17	3.16e-14	LOC103380616	NC_024313.1	345422	370643	+	7524	protein_coding	centromere-associated protein E-like && sp|Q02224|CENPE_HUMAN Centromere-associated protein E OS=Homo sapiens OX=9606 GN=CENPE PE=1 SV=2 && PF00225:Kinesin motor domain	-
103379055	40.3214	24.2603	13.024	340.92	273.391	496.41	25.8685	370.241	-3.83569	7.44e-17	3.35e-14	gatm	NC_024311.1	11502719	11507706	-	2208	protein_coding	glycine amidinotransferase && sp|Q9I9K9|GATM_CHICK Glycine amidinotransferase, mitochondrial OS=Gallus gallus OX=9031 GN=GATM PE=2 SV=2 && -	-
103395967	68.371	39.423	28.8388	390.963	737.814	1137.23	45.5443	755.336	-4.04964	7.6e-17	3.35e-14	LOC103395967	NC_024308.1	6476076	6478526	+	1512	protein_coding	angiopoietin-related protein 4-like && sp|Q6TMA8|ANGL4_RAT Angiopoietin-related protein 4 OS=Rattus norvegicus OX=10116 GN=Angptl4 PE=1 SV=1 && PF00147:Fibrinogen beta and gamma chains, C-terminal globular domain	-
103392406	2005.55	1551.65	2130.35	7002.93	6428.7	7507.33	1895.85	6979.65	-1.88021	1.49e-16	6.4e-14	slc40a1	NC_024322.1	16345887	16354832	-	4776	protein_coding	solute carrier family 40 member 1%2C transcript variant X2 && sp|Q9I9R3|S40A1_DANRE Solute carrier family 40 member 1 OS=Danio rerio OX=7955 GN=slc40a1 PE=2 SV=2 && -	-
103383227	90.2848	105.128	81.8649	456.645	1091.28	789.242	92.4259	779.055	-3.0757	3.84e-16	1.61e-13	LOC103383227	NC_024315.1	1117687	1119572	-	1886	protein_coding	beta-1%2C3-galactosyltransferase 2-like && sp|Q5R5Y3|B3GT2_PONAB Beta-1,3-galactosyltransferase 2 OS=Pongo abelii OX=9601 GN=B3GALT2 PE=2 SV=1 && PF01762:Galactosyltransferase	-
103395130	176.187	134.443	110.704	645.35	995.191	1151.27	140.444	930.604	-2.72748	4.01e-16	1.65e-13	LOC103395130	NC_024325.1	8056167	8064585	-	3026	protein_coding	multidrug and toxin extrusion protein 1-like && sp|A1L1P9|S47A1_DANRE Multidrug and toxin extrusion protein 1 OS=Danio rerio OX=7955 GN=slc47a1 PE=2 SV=1 && PF01554:MatE	-
103388046	627.611	378.057	946.097	51.0859	69.7777	77.2194	650.588	66.0277	3.30075	5.67e-16	2.28e-13	LOC103388046	NC_024319.1	3075641	3087566	+	5269	protein_coding	ras GTPase-activating-like protein IQGAP3 && sp|Q86VI3|IQGA3_HUMAN Ras GTPase-activating-like protein IQGAP3 OS=Homo sapiens OX=9606 GN=IQGAP3 PE=1 SV=2 && PF00616:GTPase-activator protein for Ras-like GTPase|PF03836:RasGAP C-terminus|PF00307:Calponin homology (CH) domain	-
103386298	210.372	348.742	303.272	1475.23	1965.22	1320.75	287.462	1587.07	-2.46555	6.03e-16	2.37e-13	etnk2	NC_024317.1	10975122	10987420	+	3582	protein_coding	ethanolamine kinase 2%2C transcript variant X1 && sp|Q9HBU6|EKI1_HUMAN Ethanolamine kinase 1 OS=Homo sapiens OX=9606 GN=ETNK1 PE=1 SV=1 && PF01633:Choline/ethanolamine kinase	-
103390212	8306.2	5490.92	6346.39	1257.34	1720.42	1521.32	6714.5	1499.69	2.16274	6.29e-16	2.42e-13	hspa5	NC_024320.1	24209573	24213841	-	2587	protein_coding	heat shock protein family A (Hsp70) member 5 && sp|Q0VCX2|BIP_BOVIN Endoplasmic reticulum chaperone BiP OS=Bos taurus OX=9913 GN=HSPA5 PE=2 SV=1 && PF00012:Hsp70 protein	-
103386961	697.735	446.794	1564.73	51.0859	58.3388	72.2051	903.088	60.5432	3.89841	7.03e-16	2.65e-13	cdk1	NC_024318.1	1911703	1915675	+	1349	protein_coding	cyclin dependent kinase 1 && sp|Q9DGD3|CDK1_ORYLA Cyclin-dependent kinase 1 OS=Oryzias latipes OX=8090 GN=cdk1 PE=2 SV=1 && PF00069:Protein kinase domain	-
103393706	700.364	578.204	1828	78.1926	80.0728	63.1795	1035.52	73.815	3.81091	7.42e-16	2.74e-13	LOC103393706	NC_024323.1	15464900	15468463	-	1919	protein_coding	importin subunit alpha-1-like && sp|P52293|IMA1_MOUSE Importin subunit alpha-1 OS=Mus musculus OX=10090 GN=Kpna2 PE=1 SV=2 && PF01749:Importin beta binding domain|PF00514:Armadillo/beta-catenin-like repeat|PF16186:Atypical Arm repeat	-
103399928	1569.9	1352.51	1236.35	4234.91	4188.95	4518.84	1386.25	4314.23	-1.63783	9.29e-16	3.36e-13	LOC103399928	NC_024308.1	14886723	14894649	+	3802	protein_coding	cyclic AMP-responsive element-binding protein 3-like protein 3-B%2C transcript variant X1 && sp|Q1LYG4|CR3LB_DANRE Cyclic AMP-responsive element-binding protein 3-like protein 3-B OS=Danio rerio OX=7955 GN=creb3l3b PE=3 SV=2 && PF00170:bZIP transcription factor	TF_bZIP
112487770	16.6545	21.2278	12.0937	184.535	361.472	154.439	16.6586	233.482	-3.81125	1.14e-15	4.04e-13	LOC112487770	NC_024307.1	32169675	32179557	+	1336	lncRNA	uncharacterized LOC112487770 && - && -	-
103378285	157.779	113.215	80.9346	6.25541	4.57559	5.01424	117.31	5.28175	4.47075	1.3e-15	4.52e-13	LOC103378285	NC_024310.1	14600262	14604215	+	3029	protein_coding	mRNA decay activator protein ZFP36L1-like%2C transcript variant X1 && sp|Q805B4|TISDB_XENLA mRNA decay activator protein ZFP36L2-B OS=Xenopus laevis OX=8355 GN=zfp36l2-B PE=1 SV=1 && PF00642:Zinc finger C-x8-C-x5-C-x3-H type (and similar)	-
103397544	13308.7	27586	34680	590.094	2310.67	1283.65	25191.6	1394.8	4.17492	1.87e-15	6.39e-13	cck	NC_024328.1	4444572	4445902	+	336	protein_coding	cholecystokinin && - && PF00048:Small cytokines (intecrine/chemokine), interleukin-8 like	-
103384917	32.4324	87.9436	32.5599	547.348	497.595	602.712	50.9786	549.219	-3.4346	2.87e-15	9.59e-13	mmp23b	NC_024316.1	8680593	8689698	+	2739	protein_coding	matrix metallopeptidase 23B%2C transcript variant X2 && sp|Q2TBM7|MMP23_BOVIN Matrix metalloproteinase-23 OS=Bos taurus OX=9913 GN=MMP23 PE=2 SV=1 && PF00413:Matrixin|PF01549:ShK domain-like	-
103398399	220.891	836.981	400.952	32.3196	30.8852	26.0741	486.275	29.7596	4.03053	3.07e-15	1.01e-12	adm	NW_007585110.1	85796	88253	+	1570	protein_coding	adrenomedullin && - && PF00214:Calcitonin / CGRP / IAPP family	-
103384974	1371.8	511.488	2646.65	102.172	57.1949	59.1681	1509.98	72.8449	4.37322	4.33e-15	1.4e-12	LOC103384974	NC_024316.1	10610575	10612137	-	1275	lncRNA	uncharacterized LOC103384974 && sp|P14730|WFD18_RAT WAP four-disulfide core domain protein 18 (Fragment) OS=Rattus norvegicus OX=10116 GN=Wfdc18 PE=2 SV=2 && -	-
103381977	194.594	135.453	431.651	10.4257	16.0146	14.0399	253.9	13.4934	4.23664	5.2e-15	1.65e-12	LOC103381977	NC_024314.1	9670908	9679201	-	3409	protein_coding	flocculation protein FLO11-like%2C transcript variant X1 && - && -	-
103393976	185.829	338.634	298.621	37.5325	14.8707	23.0655	274.361	25.1562	3.44209	5.63e-15	1.76e-12	LOC103393976	NC_024308.1	2822252	2904373	-	4356	protein_coding	nuclear receptor subfamily 5 group A member 2-like%2C transcript variant X2 && sp|O42101|NR5A2_CHICK Nuclear receptor subfamily 5 group A member 2 OS=Gallus gallus OX=9031 GN=NR5A2 PE=2 SV=1 && PF00105:Zinc finger, C4 type (two domains)|PF00104:Ligand-binding domain of nuclear hormone receptor	SF-like
112487697	4.38276	3.03254	3.72113	138.662	93.7996	67.1909	3.71214	99.884	-4.74168	8.08e-15	2.47e-12	LOC112487697	NC_024317.1	8387955	8391321	+	3082	lncRNA	uncharacterized LOC112487697 && sp|Q3T9X0|GTR9_MOUSE Solute carrier family 2, facilitated glucose transporter member 9 OS=Mus musculus OX=10090 GN=Slc2a9 PE=1 SV=1 && -	-
103387939	643.389	402.317	881.908	62.5541	92.6557	95.2706	642.538	83.4935	2.94456	1.02e-14	3.07e-12	ncapd2	NC_024319.1	2169800	2184796	-	4621	protein_coding	non-SMC condensin I complex subunit D2 && sp|Q9YHY6|CND1_XENLA Condensin complex subunit 1 OS=Xenopus laevis OX=8355 GN=ncapd2 PE=1 SV=1 && PF12717:non-SMC mitotic condensation complex subunit 1	-
103376878	76.26	193.072	115.355	3.12771	5.71949	5.01424	128.229	4.62048	4.79843	1.09e-14	3.19e-12	LOC103376878	NC_024309.1	1737918	1807361	-	11741	protein_coding	SCO-spondin && sp|Q2PC93|SSPO_CHICK SCO-spondin OS=Gallus gallus OX=9031 GN=SSPO PE=2 SV=1 && PF00754:F5/8 type C domain|PF00057:Low-density lipoprotein receptor domain class A|PF00090:Thrombospondin type 1 domain|PF01826:Trypsin Inhibitor like cysteine rich domain	-
103378234	168.298	182.963	105.122	5429.7	5239.05	827.35	152.128	3832.03	-4.65485	1.09e-14	3.19e-12	slc13a5	NC_024310.1	14027474	14036407	+	1962	protein_coding	solute carrier family 13 member 5 && sp|Q86YT5|S13A5_HUMAN Solute carrier family 13 member 5 OS=Homo sapiens OX=9606 GN=SLC13A5 PE=1 SV=1 && PF00939:Sodium:sulfate symporter transmembrane region	-
103387665	299.78	243.614	533.982	41.7027	40.0364	47.1339	359.126	42.9577	3.06276	1.17e-14	3.37e-12	kif11	NC_024318.1	14370563	14380818	-	3600	protein_coding	kinesin family member 11 && sp|B2GU58|KIF11_XENTR Kinesin-like protein KIF11 OS=Xenopus tropicalis OX=8364 GN=kif11 PE=2 SV=1 && PF13931:Kinesin-associated microtubule-binding|PF00225:Kinesin motor domain	-
103383533	142.878	143.54	78.1437	784.012	754.972	583.658	121.521	707.547	-2.54174	1.3e-14	3.67e-12	mtap	NC_024315.1	5548070	5559753	+	3862	protein_coding	methylthioadenosine phosphorylase%2C transcript variant X2 && sp|Q7ZV22|MTAP_DANRE S-methyl-5'-thioadenosine phosphorylase OS=Danio rerio OX=7955 GN=mtap PE=2 SV=2 && PF01048:Phosphorylase superfamily	-
103385847	576.771	434.664	600.962	138.662	132.692	109.311	537.466	126.888	2.08365	1.36e-14	3.78e-12	atad3a	NC_024317.1	2649061	2654225	+	2436	protein_coding	ATPase family%2C AAA domain containing 3A && sp|Q6PAX2|ATD3B_XENLA ATPase family AAA domain-containing protein 3-B OS=Xenopus laevis OX=8355 GN=atad3-b PE=2 SV=1 && PF12037:Domain of unknown function (DUF3523)|PF00004:ATPase family associated with various cellular activities (AAA)	-
103381022	114.828	190.039	55.8169	1680.62	1328.06	1001.85	120.228	1336.84	-3.47627	1.4e-14	3.84e-12	LOC103381022	NC_024307.1	1904759	1908556	+	1156	protein_coding	alcohol dehydrogenase class-3 chain L-like && sp|P81601|ADHL_GADMO Alcohol dehydrogenase class-3 chain L OS=Gadus morhua OX=8049 PE=1 SV=1 && PF00107:Zinc-binding dehydrogenase|PF08240:Alcohol dehydrogenase GroES-like domain	-
103386812	361.139	263.831	453.048	68.8095	54.9071	66.188	359.339	63.3015	2.50408	1.83e-14	4.93e-12	LOC103386812	NC_024317.1	20067508	20074753	-	2448	protein_coding	oxidative stress-induced growth inhibitor 2-like && sp|Q9Y236|OSGI2_HUMAN Oxidative stress-induced growth inhibitor 2 OS=Homo sapiens OX=9606 GN=OSGIN2 PE=2 SV=1 && -	-
103386221	310.299	184.985	425.139	28.1494	38.8925	37.1054	306.808	34.7158	3.14509	2.17e-14	5.77e-12	cit	NC_024317.1	8606153	8637228	-	8978	protein_coding	citron rho-interacting serine/threonine kinase%2C transcript variant X1 && sp|O14578|CTRO_HUMAN Citron Rho-interacting kinase OS=Homo sapiens OX=9606 GN=CIT PE=1 SV=2 && PF00069:Protein kinase domain|PF00780:CNH domain|PF00169:PH domain	-
103377575	834.477	1239.3	558.169	19.8088	76.6411	73.208	877.315	56.5526	3.95633	2.22e-14	5.82e-12	ptx3	NC_024310.1	570625	574074	-	1664	protein_coding	pentraxin 3 && sp|Q0VCG9|PTX3_BOVIN Pentraxin-related protein PTX3 OS=Bos taurus OX=9913 GN=PTX3 PE=2 SV=1 && PF00354:Pentaxin family	-
103393061	220.891	147.584	364.671	20.8514	27.4535	19.0541	244.382	22.453	3.44815	3.02e-14	7.8e-12	ccnf	NC_024323.1	9211766	9219827	-	3729	protein_coding	cyclin F && sp|Q6NYX6|CCNF_DANRE Cyclin-F OS=Danio rerio OX=7955 GN=ccnf PE=2 SV=1 && PF02984:Cyclin, C-terminal domain|PF12937:F-box-like|PF00134:Cyclin, N-terminal domain	-
112487904	116.581	148.594	140.473	481.667	496.452	444.262	135.216	474.127	-1.81108	3.28e-14	8.34e-12	LOC112487904	NC_024319.1	498301	501527	+	1401	lncRNA	uncharacterized LOC112487904%2C transcript variant X1 && sp|Q8K2Y3|EVA1B_MOUSE Protein eva-1 homolog B OS=Mus musculus OX=10090 GN=Eva1b PE=1 SV=1 && -	-
103395198	33.3089	86.9328	37.2113	626.584	720.655	377.071	52.4843	574.77	-3.45699	3.75e-14	9.42e-12	LOC103395198	NC_024325.1	9420432	9424323	-	2267	protein_coding	Na(+)/H(+) exchange regulatory cofactor NHE-RF4-like%2C transcript variant X1 && sp|Q86UT5|NHRF4_HUMAN Na(+)/H(+) exchange regulatory cofactor NHE-RF4 OS=Homo sapiens OX=9606 GN=PDZD3 PE=1 SV=2 && PF17820:PDZ domain|PF00595:PDZ domain	-
103382691	1041.34	1191.79	752.598	5502.68	4836.4	3591.2	995.243	4643.43	-2.22215	4.1e-14	1.02e-11	LOC103382691	NC_024314.1	19540576	19547172	-	3217	protein_coding	differentially expressed in FDCP 6 homolog%2C transcript variant X2 && sp|Q7SYB5|DEFI6_DANRE Differentially expressed in FDCP 6 homolog OS=Danio rerio OX=7955 GN=def6 PE=2 SV=1 && PF00169:PH domain	-
103396068	1559.38	2684.81	488.398	105.299	42.3242	35.0997	1577.53	60.9078	4.69445	4.24e-14	1.04e-11	tf	NC_024326.1	3959991	3965050	+	2213	protein_coding	transferrin && sp|P79819|TRFE_ORYLA Serotransferrin OS=Oryzias latipes OX=8090 GN=tf PE=3 SV=1 && PF00405:Transferrin	-
103381343	275.237	188.017	331.181	27.1068	19.4463	43.1225	264.812	29.8918	3.14157	4.39e-14	1.06e-11	bub1	NC_024313.1	13544878	13552383	+	4139	protein_coding	BUB1 mitotic checkpoint serine/threonine kinase && sp|O43683|BUB1_HUMAN Mitotic checkpoint serine/threonine-protein kinase BUB1 OS=Homo sapiens OX=9606 GN=BUB1 PE=1 SV=1 && PF08311:Mad3/BUB1 homology region 1|PF00069:Protein kinase domain	-
103398554	183.199	185.996	128.379	614.073	983.752	869.47	165.858	822.432	-2.30996	4.62e-14	1.1e-11	nkd1	NW_007585114.1	404965	432404	+	5801	protein_coding	naked cuticle homolog 1 && sp|Q2TJA6|NKD1_DANRE Protein naked cuticle homolog 1 OS=Danio rerio OX=7955 GN=nkd1 PE=2 SV=1 && -	-
103386400	5.25931	1.01085	8.37254	118.853	117.821	79.2251	4.8809	105.3	-4.41185	6.61e-14	1.55e-11	LOC103386400	NC_024317.1	12449753	12452062	-	1053	protein_coding	sterol O-acyltransferase 1-like && sp|P35610|SOAT1_HUMAN Sterol O-acyltransferase 1 OS=Homo sapiens OX=9606 GN=SOAT1 PE=1 SV=3 && PF03062:MBOAT, membrane-bound O-acyltransferase family	-
103393509	2071.29	2229.93	2655.03	815.289	748.109	739.1	2318.75	767.499	1.59507	7.13e-14	1.65e-11	prmt1	NC_024323.1	13679694	13684953	+	1945	protein_coding	protein arginine methyltransferase 1 && sp|Q28F07|ANM1_XENTR Protein arginine N-methyltransferase 1 OS=Xenopus tropicalis OX=8364 GN=prmt1 PE=2 SV=1 && PF13649:Methyltransferase domain	-
103385775	994.009	1349.48	841.906	224.152	234.499	144.41	1061.8	201.02	2.40181	7.43e-14	1.7e-11	LOC103385775	NC_024307.1	22597479	22611771	-	3217	protein_coding	equilibrative nucleoside transporter 2-like && sp|O54699|S29A2_RAT Equilibrative nucleoside transporter 2 OS=Rattus norvegicus OX=10116 GN=Slc29a2 PE=2 SV=1 && PF01733:Nucleoside transporter	-
103394001	259.459	114.226	336.762	14.596	21.7341	18.0513	236.816	18.1271	3.71076	8.55e-14	1.93e-11	cdca8	NC_024324.1	2984875	2988392	+	1325	protein_coding	cell division cycle associated 8 && sp|Q5XLR4|BORE1_DANRE Borealin OS=Danio rerio OX=7955 GN=cdca8 PE=2 SV=2 && PF10444:Nbl1 / Borealin N terminal|PF10512:Cell division cycle-associated protein 8	-
103380481	1888.97	2128.84	1859.63	5408.85	8054.18	7071.09	1959.15	6844.7	-1.80479	1.13e-13	2.52e-11	rsl24d1	NC_024312.1	16350506	16352415	-	893	protein_coding	ribosomal L24 domain containing 1 && sp|Q7ZTZ2|RLP24_DANRE Probable ribosome biogenesis protein RLP24 OS=Danio rerio OX=7955 GN=rsl24d1 PE=2 SV=1 && PF01246:Ribosomal protein L24e	-
103381131	195.471	134.443	349.786	9.38312	13.7268	23.0655	226.567	15.3918	3.87581	1.19e-13	2.63e-11	pbk	NC_024313.1	10425971	10428923	-	1397	protein_coding	PDZ binding kinase%2C transcript variant X1 && sp|Q6DHU8|TOPK_DANRE Lymphokine-activated killer T-cell-originated protein kinase homolog OS=Danio rerio OX=7955 GN=pbk PE=2 SV=1 && PF00069:Protein kinase domain	-
103381916	22.7903	28.3037	14.8845	167.854	169.297	129.367	21.9929	155.506	-2.82498	1.37e-13	2.99e-11	LOC103381916	NC_024314.1	8685649	8698460	+	2461	protein_coding	zinc finger CCHC domain-containing protein 24 && sp|Q8N2G6|ZCH24_HUMAN Zinc finger CCHC domain-containing protein 24 OS=Homo sapiens OX=9606 GN=ZCCHC24 PE=1 SV=1 && PF13696:Zinc knuckle|PF17180:Zinc-binding domain	-
103397424	340.102	234.516	505.143	21.8939	42.3242	49.1396	359.921	37.7859	3.25202	1.47e-13	3.16e-11	ncaph	NC_024328.1	2495105	2506044	-	2433	protein_coding	non-SMC condensin I complex subunit H && sp|O13067|CND2_XENLA Condensin complex subunit 2 OS=Xenopus laevis OX=8355 GN=ncaph PE=1 SV=1 && PF05786:Condensin complex subunit 2	-
novel.483	1189.48	224.408	483.747	18.7662	36.6047	35.0997	632.545	30.1569	4.3918	1.66e-13	3.53e-11	-	NC_024320.1	15084072	15086592	-	1587	-	- && - && -	-
103393827	1807.45	146.573	4093.24	4.17027	3.43169	5.01424	2015.75	4.2054	8.90233	1.8e-13	3.78e-11	LOC103393827	NC_024324.1	911326	912712	-	777	protein_coding	uncharacterized LOC103393827 && - && -	-
103376927	655.66	81.8786	173.033	6.25541	1.1439	5.01424	303.524	4.13785	6.18278	1.85e-13	3.84e-11	LOC103376927	NC_024309.1	3392076	3394128	+	1260	protein_coding	CCAAT/enhancer-binding protein gamma-like && sp|Q15744|CEBPE_HUMAN CCAAT/enhancer-binding protein epsilon OS=Homo sapiens OX=9606 GN=CEBPE PE=1 SV=2 && PF07716:Basic region leucine zipper	C/EBP
103382222	50.84	64.6942	44.6536	341.962	387.781	219.624	53.3959	316.456	-2.56838	2.33e-13	4.78e-11	LOC103382222	NC_024314.1	14674800	14683597	+	3737	protein_coding	dual specificity mitogen-activated protein kinase kinase 6-like && sp|Q9DGE0|MP2K6_DANRE Dual specificity mitogen-activated protein kinase kinase 6 OS=Danio rerio OX=7955 GN=map2k6 PE=1 SV=2 && PF00069:Protein kinase domain	-
103380986	399.707	109.171	84.6557	0	0	0	197.845	0	9.98548	2.47e-13	5.02e-11	LOC103380986	NC_024313.1	7193166	7195830	+	2665	protein_coding	thyroxine 5-deiodinase-like && sp|A7YD35|IOD3_SPAAU Thyroxine 5-deiodinase OS=Sparus aurata OX=8175 GN=dio3 PE=2 SV=2 && PF00837:Iodothyronine deiodinase	-
103388931	1.7531	3.03254	1.86056	46.9156	162.433	129.367	2.2154	112.906	-5.68438	2.77e-13	5.56e-11	LOC103388931	NC_024319.1	20216631	20218609	-	877	protein_coding	type-4 ice-structuring protein LS-12-like && - && PF04711:Apolipoprotein A-II (ApoA-II)	-
103397981	3457.99	3911.98	4146.27	1353.25	1513.38	1376.91	3838.75	1414.51	1.4404	2.81e-13	5.58e-11	LOC103397981	NC_024328.1	13996414	14020570	+	5036	protein_coding	2-oxoglutarate dehydrogenase%2C mitochondrial%2C transcript variant X2 && sp|Q02218|ODO1_HUMAN 2-oxoglutarate dehydrogenase, mitochondrial OS=Homo sapiens OX=9606 GN=OGDH PE=1 SV=3 && PF16078:2-oxoglutarate dehydrogenase N-terminus|PF16870:2-oxoglutarate dehydrogenase C-terminal|PF00676:Dehydrogenase E1 component|PF02779:Transketolase, pyrimidine binding domain	-
103378534	468.955	216.321	707.945	52.1284	40.0364	39.1111	464.407	43.7586	3.40778	3.02e-13	5.93e-11	LOC103378534	NC_024307.1	9979496	9982998	-	1898	protein_coding	platelet-activating factor receptor && sp|P25105|PTAFR_HUMAN Platelet-activating factor receptor OS=Homo sapiens OX=9606 GN=PTAFR PE=1 SV=1 && PF00001:7 transmembrane receptor (rhodopsin family)	-
103396746	1416.51	144.551	350.716	15.6385	16.0146	19.0541	637.258	16.9024	5.23612	3.55e-13	6.9e-11	LOC103396746	NC_024326.1	12819828	12822755	+	690	protein_coding	purine nucleoside phosphorylase-like && sp|P00491|PNPH_HUMAN Purine nucleoside phosphorylase OS=Homo sapiens OX=9606 GN=PNP PE=1 SV=2 && PF01048:Phosphorylase superfamily	-
103397874	246.311	137.475	312.575	15.6385	30.8852	24.0684	232.12	23.5307	3.30649	3.64e-13	6.99e-11	ckap2l	NC_024328.1	10335047	10351103	+	2412	protein_coding	cytoskeleton associated protein 2 like && sp|Q8IYA6|CKP2L_HUMAN Cytoskeleton-associated protein 2-like OS=Homo sapiens OX=9606 GN=CKAP2L PE=1 SV=4 && PF15297:Cytoskeleton-associated protein 2 C-terminus	-
103377502	134.112	70.7593	234.431	8.34055	4.57559	7.01994	146.434	6.64536	4.45554	3.67e-13	6.99e-11	cip2a	NC_024309.1	16012443	16019476	-	3205	protein_coding	cell proliferation regulating inhibitor of protein phosphatase 2A && sp|Q8BWY9|CIP2A_MOUSE Protein CIP2A OS=Mus musculus OX=10090 GN=Cip2a PE=1 SV=3 && -	-
103390571	2510.44	8885.34	8347.42	324.239	523.905	110.313	6581.07	319.486	4.365	4.12e-13	7.76e-11	nox1	NC_024321.1	1334535	1339715	+	2398	protein_coding	NADPH oxidase 1 && sp|P04839|CY24B_HUMAN Cytochrome b-245 heavy chain OS=Homo sapiens OX=9606 GN=CYBB PE=1 SV=2 && PF08030:Ferric reductase NAD binding domain|PF08022:FAD-binding domain|PF01794:Ferric reductase like transmembrane component	-
103383713	154.273	99.063	356.298	12.5108	3.43169	8.02279	203.211	7.98844	4.65985	4.31e-13	8.03e-11	melk	NC_024315.1	8061673	8068198	-	2702	protein_coding	maternal embryonic leucine zipper kinase%2C transcript variant X1 && sp|F1QGZ6|MELK_DANRE Maternal embryonic leucine zipper kinase OS=Danio rerio OX=7955 GN=melk PE=2 SV=1 && PF00069:Protein kinase domain|PF02149:Kinase associated domain 1	-
103394580	13.1483	14.1519	12.0937	80.2778	160.146	179.51	13.1313	139.978	-3.41518	5.14e-13	9.48e-11	LOC103394580	NC_024308.1	4662153	4670698	+	4042	protein_coding	uncharacterized LOC103394580%2C transcript variant X1 && sp|P36402|TCF7_HUMAN Transcription factor 7 OS=Homo sapiens OX=9606 GN=TCF7 PE=1 SV=3 && PF00505:HMG (high mobility group) box	HMG
103382084	255.076	87.9436	154.427	12.5108	10.2951	13.037	165.816	11.9476	3.7931	5.34e-13	9.75e-11	g2e3	NC_024307.1	16397563	16404041	-	3022	protein_coding	G2/M-phase specific E3 ubiquitin protein ligase && sp|Q7L622|G2E3_HUMAN G2/M phase-specific E3 ubiquitin-protein ligase OS=Homo sapiens OX=9606 GN=G2E3 PE=1 SV=1 && PF13771:PHD-like zinc-binding domain|PF00632:HECT-domain (ubiquitin-transferase)	-
107988396	468.955	377.046	361.88	76.1075	106.382	108.308	402.627	96.9325	2.05509	6.73e-13	1.22e-10	LOC107988396	NC_024309.1	3336216	3342820	-	3249	lncRNA	uncharacterized LOC107988396%2C transcript variant X1 && - && -	-
112488045	8137.9	3012.32	6437.55	189.747	719.512	363.031	5862.59	424.097	3.78952	7.59e-13	1.36e-10	LOC112488045	NC_024320.1	15080888	15082854	-	1253	lncRNA	uncharacterized LOC112488045 && - && -	-
103381751	703.871	573.15	1308.91	66.7244	100.663	140.399	861.976	102.595	3.07019	8.39e-13	1.49e-10	top2a	NC_024314.1	5553571	5565109	+	5070	protein_coding	DNA topoisomerase II alpha && sp|O46374|TOP2A_PIG DNA topoisomerase 2-alpha OS=Sus scrofa OX=9823 GN=TOP2A PE=2 SV=1 && PF00204:DNA gyrase B|PF02518:Histidine kinase-, DNA gyrase B-, and HSP90-like ATPase|PF00521:DNA gyrase/topoisomerase IV, subunit A|PF01751:Toprim domain|PF16898:C-terminal associated domain of TOPRIM|PF08070:DTHCT (NUC029) region	-
103380317	1360.41	1653.74	1537.76	259.6	315.716	466.325	1517.3	347.213	2.12706	8.85e-13	1.55e-10	LOC103380317	NC_024312.1	13608327	13636264	+	3890	protein_coding	fibulin-1-like%2C transcript variant X1 && sp|O42182|FBLN1_DANRE Fibulin-1 OS=Danio rerio OX=7955 GN=fbln1 PE=2 SV=1 && PF07645:Calcium-binding EGF domain|PF12662:Complement Clr-like EGF-like	-
103386106	250.694	278.994	238.152	1452.3	901.391	906.575	255.947	1086.75	-2.08644	1.01e-12	1.74e-10	LOC103386106	NC_024317.1	6384787	6388217	-	1369	protein_coding	heme transporter hrg1-A-like && sp|Q7T3B2|HRG1A_DANRE Heme transporter hrg1-A OS=Danio rerio OX=7955 GN=slc48a1b PE=2 SV=1 && PF16954:Haem-transporter, endosomal/lysosomal, haem-responsive gene	-
103378976	2094.08	2002.49	1736.84	6862.19	5020.57	6642.87	1944.47	6175.21	-1.66714	1.01e-12	1.74e-10	LOC103378976	NC_024307.1	10849990	10876573	-	3774	protein_coding	phospholipase D1-like && sp|O08684|PLD1_CRIGR Phospholipase D1 OS=Cricetulus griseus OX=10029 GN=PLD1 PE=2 SV=1 && PF00787:PX domain|PF13091:PLD-like domain|PF00169:PH domain|PF00614:Phospholipase D Active site motif	-
103390607	3684.14	1664.86	1719.16	341.962	398.076	240.684	2356.06	326.908	2.84993	1.02e-12	1.75e-10	gsr	NC_024321.1	2666740	2671437	-	2217	protein_coding	glutathione-disulfide reductase && sp|A2TIL1|GSHR_CALJA Glutathione reductase, mitochondrial OS=Callithrix jacchus OX=9483 GN=GSR PE=2 SV=1 && PF02852:Pyridine nucleotide-disulphide oxidoreductase, dimerisation domain|PF07992:Pyridine nucleotide-disulphide oxidoreductase	-
103385300	1256.97	882.469	2503.39	131.364	154.426	233.664	1547.61	173.151	3.15952	1.18e-12	1.99e-10	LOC103385300	NC_024316.1	16429896	16432333	-	1597	protein_coding	tubulin alpha chain && sp|P36220|TBA_TORMA Tubulin alpha chain OS=Torpedo marmorata OX=7788 PE=2 SV=1 && PF00091:Tubulin/FtsZ family, GTPase domain|PF03953:Tubulin C-terminal domain	-
103394683	665.302	804.634	1186.11	3303.9	4758.61	4155.81	885.349	4072.77	-2.20171	1.24e-12	2.08e-10	LOC103394683	NC_024324.1	14154169	14164160	-	3482	protein_coding	sodium-dependent neutral amino acid transporter B(0)AT1-like%2C transcript variant X1 && sp|Q2A865|S6A19_RAT Sodium-dependent neutral amino acid transporter B(0)AT1 OS=Rattus norvegicus OX=10116 GN=Slc6a19 PE=1 SV=2 && PF00209:Sodium:neurotransmitter symporter family	-
103386685	209.496	107.15	404.673	12.5108	13.7268	20.057	240.439	15.4315	3.95931	1.33e-12	2.2e-10	LOC103386685	NC_024317.1	17914856	17919353	-	2480	protein_coding	aurora kinase C && sp|Q91819|AURAB_XENLA Aurora kinase A-B OS=Xenopus laevis OX=8355 GN=aurka-b PE=2 SV=3 && PF00069:Protein kinase domain	-
103383688	233.163	179.931	452.117	16.6811	27.4535	36.1026	288.404	26.7457	3.42983	1.39e-12	2.28e-10	ncapg	NC_024315.1	7557586	7565351	+	3313	protein_coding	non-SMC condensin I complex subunit G%2C transcript variant X1 && sp|Q9YHB5|CND3_XENLA Condensin complex subunit 3 OS=Xenopus laevis OX=8355 GN=ncapg PE=1 SV=1 && PF12719:Nuclear condensing complex subunits, C-term domain	-
novel.790	25.42	66.7159	69.7712	480.624	1139.32	430.222	53.969	683.389	-3.6643	1.55e-12	2.53e-10	-	NW_007585514.1	1	1845	-	1845	-	- && - && -	-
103383935	553.98	599.432	617.708	1439.79	1730.72	1791.09	590.373	1653.86	-1.48624	1.81e-12	2.92e-10	exosc1	NC_024315.1	12712956	12716388	+	1317	protein_coding	exosome component 1%2C transcript variant X1 && sp|Q9DAA6|EXOS1_MOUSE Exosome complex component CSL4 OS=Mus musculus OX=10090 GN=Exosc1 PE=1 SV=1 && PF14382:Exosome complex exonuclease RRP4 N-terminal region|PF10447:Exosome component EXOSC1/CSL4	-
103383451	225.274	228.451	800.043	28.1494	26.3096	11.0313	417.923	21.8301	4.26201	1.91e-12	3.05e-10	plk1	NC_024315.1	4390687	4395239	+	2595	protein_coding	polo like kinase 1 && sp|P70032|PLK1_XENLA Serine/threonine-protein kinase PLK1 OS=Xenopus laevis OX=8355 GN=plk1 PE=1 SV=1 && PF00069:Protein kinase domain	-
103397920	1150.04	1460.67	2116.39	225.195	376.342	299.852	1575.7	300.463	2.39118	2.13e-12	3.38e-10	tars	NC_024328.1	12792480	12808841	+	2589	protein_coding	threonyl-tRNA synthetase && sp|Q3ZBV8|SYTC_BOVIN Threonine--tRNA ligase 1, cytoplasmic OS=Bos taurus OX=9913 GN=TARS1 PE=2 SV=1 && PF03129:Anticodon binding domain|PF02824:TGS domain|PF00587:tRNA synthetase class II core domain (G, H, P, S and T)|PF07973:Threonyl and Alanyl tRNA synthetase second additional domain	-
103388165	52.5931	179.931	26.9782	1370.98	2672.14	1331.78	86.5006	1791.64	-4.37446	2.45e-12	3.85e-10	LOC103388165	NC_024319.1	4296011	4297777	+	1493	protein_coding	serum amyloid P-component-like && sp|P49255|SAMP_CAVPO Serum amyloid P-component OS=Cavia porcellus OX=10141 GN=PTX2 PE=3 SV=1 && PF00354:Pentaxin family	-
103388675	260.336	153.649	398.161	14.596	17.1585	36.1026	270.715	22.619	3.57665	2.49e-12	3.87e-10	ttk	NC_024319.1	13992784	13999628	+	3515	protein_coding	TTK protein kinase && sp|Q8AYG3|TTK_DANRE Dual specificity protein kinase Ttk OS=Danio rerio OX=7955 GN=ttk PE=1 SV=2 && PF00069:Protein kinase domain	-
103394739	177.063	174.876	400.021	15.6385	27.4535	29.0826	250.654	24.0582	3.3818	2.58e-12	3.98e-10	LOC103394739	NC_024325.1	74650	87599	-	4355	protein_coding	chromosome-associated kinesin KIF4-like && sp|Q91784|KIF4_XENLA Chromosome-associated kinesin KIF4 OS=Xenopus laevis OX=8355 GN=kif4 PE=2 SV=1 && PF00225:Kinesin motor domain	-
103398022	9.64206	16.1735	13.024	12320	31257	185.527	12.9465	14587.5	-10.1387	2.63e-12	4.03e-10	LOC103398022	NC_024328.1	14611334	14613396	+	1350	protein_coding	natterin-3-like && sp|Q66S17|NATT3_THANI Natterin-3 OS=Thalassophryne nattereri OX=289382 PE=1 SV=1 && PF11901:Protein of unknown function (DUF3421)	-
103389253	1906.5	1949.92	1875.45	464.986	710.36	502.427	1910.62	559.258	1.77302	2.96e-12	4.5e-10	LOC103389253	NC_024320.1	4811751	4823257	+	2678	protein_coding	cystathionine beta-synthase-like && sp|Q58H57|CBS_MACFA Cystathionine beta-synthase OS=Macaca fascicularis OX=9541 GN=CBS PE=2 SV=3 && PF00291:Pyridoxal-phosphate dependent enzyme	-
103381079	193.718	131.41	128.379	10.4257	25.1657	10.0285	151.169	15.2066	3.32689	3.13e-12	4.71e-10	mtfr2	NC_024313.1	9102619	9107289	+	1932	protein_coding	mitochondrial fission regulator 2%2C transcript variant X2 && sp|Q08BD8|MTRF2_DANRE Mitochondrial fission regulator 2 OS=Danio rerio OX=7955 GN=mtfr2 PE=2 SV=1 && PF05308:Mitochondrial fission regulator	-
103397929	412.856	572.139	426.069	114.683	141.843	120.342	470.355	125.623	1.90515	3.27e-12	4.89e-10	aacs	NC_024328.1	13022754	13053816	+	3977	protein_coding	acetoacetyl-CoA synthetase && sp|A3QK15|AACS_DANRE Acetoacetyl-CoA synthetase OS=Danio rerio OX=7955 GN=aacs PE=2 SV=1 && PF16177:Acetyl-coenzyme A synthetase N-terminus|PF00501:AMP-binding enzyme	-
103387839	263.842	174.876	210.244	784.012	805.304	688.957	216.321	759.424	-1.8104	3.37e-12	5e-10	LOC103387839	NC_024319.1	242647	250376	+	4019	protein_coding	hepatic leukemia factor%2C transcript variant X1 && sp|Q8BW74|HLF_MOUSE Hepatic leukemia factor OS=Mus musculus OX=10090 GN=Hlf PE=2 SV=1 && PF07716:Basic region leucine zipper	TF_bZIP
103394504	194.594	205.202	464.211	8.34055	22.8779	30.0855	288.002	20.4347	3.81635	3.88e-12	5.7e-10	anln	NC_024324.1	11917261	11931343	-	5308	protein_coding	anillin actin binding protein%2C transcript variant X1 && sp|Q801E2|ANLN_XENLA Anillin OS=Xenopus laevis OX=8355 GN=anln PE=1 SV=1 && PF16018:Anillin N-terminus|PF00169:PH domain|PF08174:Cell division protein anillin	-
103399775	209.496	273.939	753.529	40.6602	25.1657	25.0712	412.321	30.299	3.76573	3.91e-12	5.7e-10	aspm	NC_024308.1	12020965	12037263	+	9955	protein_coding	abnormal spindle microtubule assembly%2C transcript variant X1 && sp|P62289|ASPM_GORGO Abnormal spindle-like microcephaly-associated protein homolog OS=Gorilla gorilla gorilla OX=9595 GN=ASPM PE=2 SV=1 && PF00307:Calponin homology (CH) domain|PF15780:Abnormal spindle-like microcephaly-assoc'd, ASPM-SPD-2-Hydin	-
103385253	303.287	177.909	376.764	10.4257	35.4608	31.0883	285.987	25.6583	3.48158	4e-12	5.79e-10	racgap1	NC_024316.1	15401910	15410859	+	2940	protein_coding	Rac GTPase activating protein 1 && sp|Q9H0H5|RGAP1_HUMAN Rac GTPase-activating protein 1 OS=Homo sapiens OX=9606 GN=RACGAP1 PE=1 SV=1 && PF00620:RhoGAP domain|PF00130:Phorbol esters/diacylglycerol binding domain (C1 domain)	-
103397875	302.41	1073.52	944.237	75.0649	89.224	50.1424	773.389	71.4771	3.43676	4.33e-12	6.21e-10	LOC103397875	NC_024328.1	10320664	10334946	+	1234	protein_coding	interleukin-1 beta-like && sp|Q9YGD3|IL1B_ONCMY Interleukin-1 beta OS=Oncorhynchus mykiss OX=8022 GN=il1b PE=2 SV=1 && PF00340:Interleukin-1 / 18	-
103397961	846.748	330.547	233.501	44.8304	38.8925	23.0655	470.265	35.5962	3.72545	4.45e-12	6.34e-10	LOC103397961	NC_024308.1	9883477	9889924	-	3016	protein_coding	P-selectin%2C transcript variant X1 && sp|P16581|LYAM2_HUMAN E-selectin OS=Homo sapiens OX=9606 GN=SELE PE=1 SV=1 && PF00084:Sushi repeat (SCR repeat)|PF00059:Lectin C-type domain	-
103382054	1148.28	1099.8	1129.36	2563.68	3090.81	3144.93	1125.82	2933.14	-1.38142	5.05e-12	7.14e-10	syf2	NC_024307.1	2253977	2259695	-	985	protein_coding	SYF2 pre-mRNA splicing factor && sp|Q6DGP2|SYF2_DANRE Pre-mRNA-splicing factor syf2 OS=Danio rerio OX=7955 GN=syf2 PE=2 SV=1 && PF08231:SYF2 splicing factor	-
103389382	261.212	124.334	334.902	12.5108	25.1657	28.0798	240.149	21.9188	3.45461	5.94e-12	8.33e-10	ndc80	NC_024307.1	28464580	28470411	-	2200	protein_coding	NDC80%2C kinetochore complex component && sp|Q6DRJ7|NDC80_DANRE Kinetochore protein NDC80 homolog OS=Danio rerio OX=7955 GN=ndc80 PE=2 SV=1 && PF18077:Domain of unknown function (DUF5595)|PF03801:HEC/Ndc80p family	-
103384605	514.536	911.784	1515.43	139.704	142.987	127.362	980.583	136.684	2.84291	6.51e-12	9.05e-10	lpcat4	NC_024307.1	20730247	20740782	-	2883	protein_coding	lysophosphatidylcholine acyltransferase 4%2C transcript variant X1 && sp|Q6DCK1|LPCT4_XENLA Lysophospholipid acyltransferase LPCAT4 OS=Xenopus laevis OX=8355 GN=lpcat4 PE=2 SV=2 && PF01553:Acyltransferase	-
103379168	175.31	283.037	191.638	926.843	805.304	762.165	216.662	831.437	-1.94146	8.87e-12	1.22e-09	maf	NC_024311.1	13849212	13943021	-	8495	protein_coding	MAF bZIP transcription factor && sp|Q98UK4|MAF_DANRE Transcription factor Maf OS=Danio rerio OX=7955 GN=maf PE=1 SV=1 && PF03131:bZIP Maf transcription factor|PF08383:Maf N-terminal region	TF_bZIP
103382127	55.2227	201.158	80.0043	2.08514	2.28779	1.00285	112.128	1.79193	5.98052	9.06e-12	1.24e-09	rbp3	NC_024314.1	12099083	12103769	+	4201	protein_coding	retinol binding protein 3 && sp|Q7SZI7|RET3_XENLA Retinol-binding protein 3 OS=Xenopus laevis OX=8355 GN=rbp3 PE=1 SV=1 && PF11918:N-terminal domain of Peptidase_S41 in eukaryotic IRBP|PF03572:Peptidase family S41	-
103395109	3564.06	5649.62	1541.48	26379.1	30552.4	29467.7	3585.05	28799.7	-3.00603	1.07e-11	1.45e-09	LOC103395109	NC_024325.1	7962302	7972269	+	3234	protein_coding	large neutral amino acids transporter small subunit 4-like%2C transcript variant X2 && sp|Q0VCM6|LAT4_BOVIN Large neutral amino acids transporter small subunit 4 OS=Bos taurus OX=9913 GN=SLC43A2 PE=2 SV=1 && PF07690:Major Facilitator Superfamily	-
103377086	431.263	202.169	593.52	56.2987	53.7632	42.1196	408.984	50.7272	3.0124	1.15e-11	1.54e-09	tacc3	NC_024307.1	6711882	6718197	-	2872	protein_coding	transforming acidic coiled-coil containing protein 3%2C transcript variant X1 && sp|Q9PTG8|TACC3_XENLA Transforming acidic coiled-coil-containing protein 3 OS=Xenopus laevis OX=8355 GN=tacc3 PE=1 SV=2 && PF05010:Transforming acidic coiled-coil-containing protein (TACC), C-terminal	-
103383691	128.853	76.8243	192.568	5.21284	4.57559	14.0399	132.749	7.94277	4.04979	1.15e-11	1.54e-09	haspin	NC_024315.1	7524837	7532391	+	4348	protein_coding	histone H3 associated protein kinase && sp|Q2KIP2|HASP_BOVIN Serine/threonine-protein kinase haspin OS=Bos taurus OX=9913 GN=HASPIN PE=2 SV=1 && PF12330:Haspin like kinase domain	-
103385869	432.14	391.198	726.551	69.8521	108.67	102.291	516.629	93.6043	2.46523	1.19e-11	1.58e-09	wdr77	NC_024317.1	2991295	2994121	-	1669	protein_coding	WD repeat domain 77 && sp|Q5RBZ2|MEP50_PONAB Methylosome protein 50 OS=Pongo abelii OX=9601 GN=WDR77 PE=2 SV=1 && -	-
103380010	1848.65	2298.66	3248.55	372.197	459.847	161.459	2465.29	331.167	2.89676	1.19e-11	1.58e-09	LOC103380010	NC_024312.1	8328157	8338907	+	1957	protein_coding	neutrophil cytosol factor 2-like && sp|P19878|NCF2_HUMAN Neutrophil cytosol factor 2 OS=Homo sapiens OX=9606 GN=NCF2 PE=1 SV=2 && PF00018:SH3 domain	-
103377101	14609.5	2820.26	2422.46	365.942	114.39	59.1681	6617.4	179.833	5.20148	1.37e-11	1.8e-09	LOC103377101	NC_024309.1	8320697	8326911	-	1988	protein_coding	uncharacterized LOC103377101 && sp|P31580|HCE1_ORYLA High choriolytic enzyme 1 OS=Oryzias latipes OX=8090 GN=hcea PE=1 SV=1 && PF01400:Astacin (Peptidase family M12A)	-
103395584	127.1	135.453	466.071	15.6385	14.8707	15.0427	242.875	15.184	3.99949	1.49e-11	1.93e-09	kif20a	NC_024325.1	16137860	16144603	-	2744	protein_coding	kinesin family member 20A && sp|Q29RT6|KI20A_BOVIN Kinesin-like protein KIF20A OS=Bos taurus OX=9913 GN=KIF20A PE=2 SV=1 && PF00225:Kinesin motor domain	-
novel.346	2624.39	3866.49	2220.58	755.862	767.555	792.251	2903.82	771.889	1.91138	1.51e-11	1.95e-09	-	NC_024317.1	11329998	11331617	+	1620	-	- && - && -	-
103390716	255.076	147.584	397.231	8.34055	28.5974	26.0741	266.63	21.004	3.66898	1.58e-11	2.03e-09	ccna2	NC_024321.1	6772916	6776786	+	2264	protein_coding	cyclin A2 && sp|P20248|CCNA2_HUMAN Cyclin-A2 OS=Homo sapiens OX=9606 GN=CCNA2 PE=1 SV=2 && PF00134:Cyclin, N-terminal domain|PF02984:Cyclin, C-terminal domain|PF16500:N-terminal region of cyclin_N	-
103379070	208.619	134.443	308.854	13.5534	13.7268	33.094	217.305	20.1247	3.42655	1.59e-11	2.03e-09	LOC103379070	NC_024311.1	11270465	11280672	-	4002	protein_coding	kinesin-like protein KIF23%2C transcript variant X1 && sp|Q02241|KIF23_HUMAN Kinesin-like protein KIF23 OS=Homo sapiens OX=9606 GN=KIF23 PE=1 SV=3 && PF16540:Arf6-interacting domain of mitotic kinesin-like protein 1|PF00225:Kinesin motor domain	-
103387677	9622.78	1987.32	2194.54	261.685	370.623	274.781	4601.55	302.363	3.92798	1.64e-11	2.07e-09	gsto1	NC_024318.1	15263562	15265978	-	1241	protein_coding	glutathione S-transferase omega 1%2C transcript variant X1 && sp|P78417|GSTO1_HUMAN Glutathione S-transferase omega-1 OS=Homo sapiens OX=9606 GN=GSTO1 PE=1 SV=2 && PF13417:Glutathione S-transferase, N-terminal domain|PF14497:Glutathione S-transferase, C-terminal domain	-
103387965	171.804	195.093	707.945	29.1919	16.0146	16.0456	358.281	20.4174	4.13223	1.69e-11	2.12e-09	cdca3	NC_024319.1	1933575	1936665	-	1614	protein_coding	cell division cycle associated 3 && - && -	-
103382106	2239.59	1840.75	2791.78	15555.1	16406.9	7197.45	2290.71	13053.2	-2.51049	1.84e-11	2.29e-09	ace	NC_024314.1	10698348	10719068	+	6087	protein_coding	angiotensin I converting enzyme && sp|Q10751|ACE_CHICK Angiotensin-converting enzyme (Fragment) OS=Gallus gallus OX=9031 GN=ACE PE=2 SV=1 && PF01401:Angiotensin-converting enzyme	-
103385925	135.865	134.443	53.9564	3.12771	3.43169	9.02564	108.088	5.19501	4.36432	1.93e-11	2.39e-09	uroc1	NC_024317.1	3565722	3571236	+	2405	protein_coding	urocanate hydratase 1 && sp|Q8VC12|HUTU_MOUSE Urocanate hydratase OS=Mus musculus OX=10090 GN=Uroc1 PE=1 SV=2 && PF17392:Urocanase C-terminal domain	-
103382782	817.822	1282.76	758.18	6864.27	13626.1	4035.46	952.922	8175.28	-3.10092	2.06e-11	2.53e-09	LOC103382782	NC_024314.1	22114594	22137865	-	3192	protein_coding	adiponectin receptor protein 2 && sp|Q86V24|PAQR2_HUMAN Adiponectin receptor protein 2 OS=Homo sapiens OX=9606 GN=ADIPOR2 PE=1 SV=1 && PF03006:Haemolysin-III related	-
103387097	106.939	228.451	55.8169	1252.12	1317.77	1025.91	130.402	1198.6	-3.20181	2.28e-11	2.79e-09	LOC103387097	NC_024318.1	4919011	4934317	-	2621	protein_coding	ABC transporter G family member 23-like && sp|Q55EH8|ABCGN_DICDI ABC transporter G family member 23 OS=Dictyostelium discoideum OX=44689 GN=abcG23 PE=3 SV=2 && PF12698:ABC-2 family transporter protein|PF00005:ABC transporter	-
103386374	106.063	81.8786	228.849	9.38312	13.7268	8.02279	138.93	10.3776	3.75018	2.67e-11	3.24e-09	ccnb3	NC_024307.1	23510700	23515194	-	1824	protein_coding	cyclin B3 && sp|P39963|CCNB3_CHICK G2/mitotic-specific cyclin-B3 OS=Gallus gallus OX=9031 GN=CCNB3 PE=2 SV=1 && PF02984:Cyclin, C-terminal domain|PF00134:Cyclin, N-terminal domain	-
103389837	250.694	45.4881	169.311	1.04257	5.71949	6.01709	155.164	4.25972	5.1912	2.7e-11	3.25e-09	LOC103389837	NC_024320.1	16166526	16176306	-	3244	protein_coding	prothrombin && sp|P00734|THRB_HUMAN Prothrombin OS=Homo sapiens OX=9606 GN=F2 PE=1 SV=2 && PF14670:Coagulation Factor Xa inhibitory site|PF00051:Kringle domain|PF09396:Thrombin light chain|PF00089:Trypsin|PF00008:EGF-like domain|PF00594:Vitamin K-dependent carboxylation/gamma-carboxyglutamic (GLA) domain	-
103389280	2646.31	826.872	750.738	31.2771	136.124	75.2137	1407.97	80.8715	4.12346	2.79e-11	3.34e-09	LOC103389280	NC_024320.1	5403232	5409251	+	2818	protein_coding	complement component C7-like%2C transcript variant X1 && sp|P10643|CO7_HUMAN Complement component C7 OS=Homo sapiens OX=9606 GN=C7 PE=1 SV=2 && PF00084:Sushi repeat (SCR repeat)|PF18434:Kazal-type serine protease inhibitor domain|PF01823:MAC/Perforin domain|PF00057:Low-density lipoprotein receptor domain class A|PF00090:Thrombospondin type 1 domain	-
103399764	68.371	54.5857	96.7494	2.08514	3.43169	6.01709	73.2354	3.84464	4.24238	3.11e-11	3.7e-09	depdc1	NC_024308.1	12011676	12019068	-	3781	protein_coding	DEP domain containing 1%2C transcript variant X1 && sp|Q803Q4|DEP1A_DANRE DEP domain-containing protein 1A OS=Danio rerio OX=7955 GN=depdc1a PE=2 SV=1 && PF00610:Domain found in Dishevelled, Egl-10, and Pleckstrin (DEP)	-
103398686	252.447	232.495	294.9	71.9372	69.7777	81.2307	259.947	74.3152	1.80567	3.54e-11	4.18e-09	LOC103398686	NW_007585122.1	55298	60831	-	1972	protein_coding	L-threonine 3-dehydrogenase%2C mitochondrial-like%2C transcript variant X2 && sp|Q2KIR8|TDH_BOVIN L-threonine 3-dehydrogenase, mitochondrial OS=Bos taurus OX=9913 GN=TDH PE=2 SV=1 && PF01370:NAD dependent epimerase/dehydratase family	-
103384438	614.462	569.107	947.958	185.577	122.397	168.479	710.509	158.818	2.16059	3.62e-11	4.25e-09	odc1	NC_024307.1	20402710	20407991	+	3266	protein_coding	ornithine decarboxylase 1 && sp|P09057|DCOR_RAT Ornithine decarboxylase OS=Rattus norvegicus OX=10116 GN=Odc1 PE=1 SV=1 && PF00278:Pyridoxal-dependent decarboxylase, C-terminal sheet domain|PF02784:Pyridoxal-dependent decarboxylase, pyridoxal binding domain	-
103383343	991.379	181.952	284.666	31.2771	27.4535	31.0883	485.999	29.9396	4.02068	3.85e-11	4.49e-09	LOC103383343	NC_024315.1	2425486	2430807	-	1445	protein_coding	uncharacterized LOC103383343 && - && -	-
103377188	339.225	288.091	339.553	71.9372	91.5118	105.299	322.29	89.5827	1.84696	3.92e-11	4.51e-09	ezh2	NC_024309.1	9903770	9910816	-	3067	protein_coding	enhancer of zeste 2 polycomb repressive complex 2 subunit%2C transcript variant X2 && sp|Q08BS4|EZH2_DANRE Histone-lysine N-methyltransferase EZH2 OS=Danio rerio OX=7955 GN=ezh2 PE=2 SV=1 && PF18118:Polycomb repressive complex 2 tri-helical domain|PF18264:CXC domain|PF11616:WD repeat binding protein EZH2|PF00856:SET domain	-
103381422	71.0006	82.8894	181.405	9.38312	8.00728	6.01709	111.765	7.8025	3.84282	3.92e-11	4.51e-09	cep55	NC_024314.1	670761	682016	-	3586	protein_coding	centrosomal protein 55%2C transcript variant X1 && sp|Q502I3|CEP55_DANRE Centrosomal protein of 55 kDa OS=Danio rerio OX=7955 GN=cep55 PE=2 SV=1 && PF12180:TSG101 and ALIX binding domain of CEP55	-
103381261	750.328	314.373	572.124	62.5541	46.8998	104.296	545.608	71.2501	2.93486	4.03e-11	4.61e-09	LOC103381261	NC_024313.1	12813701	12818541	-	2255	protein_coding	hydroxycarboxylic acid receptor 2-like && sp|Q8TDS4|HCAR2_HUMAN Hydroxycarboxylic acid receptor 2 OS=Homo sapiens OX=9606 GN=HCAR2 PE=1 SV=1 && PF00001:7 transmembrane receptor (rhodopsin family)	-
103386817	19.2841	56.6074	13.024	210.599	587.963	1094.11	29.6385	630.89	-4.41636	4.07e-11	4.62e-09	LOC103386817	NC_024317.1	20139419	20143045	-	1051	protein_coding	purine nucleoside phosphorylase-like && sp|P00491|PNPH_HUMAN Purine nucleoside phosphorylase OS=Homo sapiens OX=9606 GN=PNP PE=1 SV=2 && PF01048:Phosphorylase superfamily	-
103380148	118.334	86.9328	67.9106	604.69	1449.32	447.271	91.0593	833.759	-3.19382	4.14e-11	4.66e-09	bhlhe41	NC_024312.1	11557427	11562022	-	3128	protein_coding	basic helix-loop-helix family member e41 && sp|Q99PV5|BHE41_MOUSE Class E basic helix-loop-helix protein 41 OS=Mus musculus OX=10090 GN=Bhlhe41 PE=1 SV=1 && PF00010:Helix-loop-helix DNA-binding domain|PF07527:Hairy Orange	bHLH
103391092	2139.66	2440.18	3549.03	788.182	800.728	711.02	2709.62	766.643	1.82154	4.15e-11	4.66e-09	g3bp1	NC_024321.1	12948419	12954889	+	3014	protein_coding	G3BP stress granule assembly factor 1 && sp|Q32LC7|G3BP1_BOVIN Ras GTPase-activating protein-binding protein 1 OS=Bos taurus OX=9913 GN=G3BP1 PE=2 SV=1 && PF02136:Nuclear transport factor 2 (NTF2) domain|PF00076:RNA recognition motif. (a.k.a. RRM, RBD, or RNP domain)	-
103377206	1.7531	4.04339	1.86056	53.171	50.3315	68.1937	2.55235	57.2321	-4.51134	4.66e-11	5.18e-09	slc22a13	NC_024309.1	10727935	10731469	+	2339	protein_coding	solute carrier family 22 member 13 && sp|Q6A4L0|S22AD_MOUSE Solute carrier family 22 member 13 OS=Mus musculus OX=10090 GN=Slc22a13 PE=1 SV=3 && PF00083:Sugar (and other) transporter	-
103395275	727.537	894.599	583.287	3024.49	2386.17	2219.3	735.141	2543.32	-1.79084	4.7e-11	5.18e-09	pdlim4	NC_024325.1	11187538	11222396	+	2743	protein_coding	PDZ and LIM domain 4 && sp|Q9PW72|PDLI4_CHICK PDZ and LIM domain protein 4 OS=Gallus gallus OX=9031 GN=PDLIM4 PE=1 SV=1 && PF00595:PDZ domain|PF00412:LIM domain|PF15936:Domain of unknown function (DUF4749)	-
103396064	210.372	156.681	638.174	12.5108	32.0291	13.037	335.076	19.1923	4.13251	4.7e-11	5.18e-09	cdc20	NC_024326.1	3935283	3938772	-	1790	protein_coding	cell division cycle 20 && sp|Q9JJ66|CDC20_MOUSE Cell division cycle protein 20 homolog OS=Mus musculus OX=10090 GN=Cdc20 PE=1 SV=2 && PF00400:WD domain, G-beta repeat|PF12894:Anaphase-promoting complex subunit 4 WD40 domain	-
103385034	15033.7	10603.8	7423.65	1499.21	2471.96	995.829	11020.4	1655.67	2.73485	4.78e-11	5.24e-09	pgd	NC_024316.1	11712170	11718405	-	2083	protein_coding	phosphogluconate dehydrogenase && sp|Q9DCD0|6PGD_MOUSE 6-phosphogluconate dehydrogenase, decarboxylating OS=Mus musculus OX=10090 GN=Pgd PE=1 SV=3 && PF00393:6-phosphogluconate dehydrogenase, C-terminal domain|PF03446:NAD binding domain of 6-phosphogluconate dehydrogenase	-
103388160	120.964	296.178	369.322	34.4048	18.3024	27.0769	262.155	26.5947	3.29787	4.83e-11	5.26e-09	rad54b	NC_024319.1	3927569	3945783	-	4918	protein_coding	RAD54 homolog B && sp|Q9DG67|RA54B_CHICK DNA repair and recombination protein RAD54B OS=Gallus gallus OX=9031 GN=RAD54B PE=2 SV=1 && PF00271:Helicase conserved C-terminal domain|PF00176:SNF2 family N-terminal domain|PF00071:Ras family	-
103378081	307.669	304.265	250.246	982.1	798.44	1292.67	287.393	1024.4	-1.83399	6.27e-11	6.79e-09	snx14	NC_024307.1	8936588	8954532	-	4259	protein_coding	sorting nexin 14%2C transcript variant X4 && sp|Q9Y5W7|SNX14_HUMAN Sorting nexin-14 OS=Homo sapiens OX=9606 GN=SNX14 PE=1 SV=3 && PF00787:PX domain|PF02194:PXA domain|PF00615:Regulator of G protein signaling domain|PF08628:Sorting nexin C terminal	-
103376894	2681.37	7279.11	2799.22	253.344	602.834	530.507	4253.23	462.228	3.20198	7.31e-11	7.87e-09	LOC103376894	NC_024309.1	2239783	2241142	+	898	protein_coding	lipocalin-like && sp|Q01584|LIPO_RHIMB Lipocalin OS=Rhinella marina OX=8386 PE=1 SV=1 && PF00061:Lipocalin / cytosolic fatty-acid binding protein family	-
103384117	512.782	589.324	256.758	2264.46	2268.35	4245.06	452.955	2925.96	-2.69167	7.62e-11	8.14e-09	LOC103384117	NC_024307.1	20018425	20023590	+	2208	protein_coding	uncharacterized LOC103384117 && - && -	-
103394360	142.878	85.922	224.198	8.34055	18.3024	16.0456	150.999	14.2295	3.41159	7.76e-11	8.25e-09	sgo1	NC_024324.1	9990227	9994284	-	2398	protein_coding	shugoshin 1 && sp|Q4KLP8|SGO1_XENLA Shugoshin 1 OS=Xenopus laevis OX=8355 GN=sgo1 PE=1 SV=1 && PF07557:Shugoshin C terminus	-
103394526	335.719	163.757	670.734	23.9791	30.8852	46.131	390.07	33.6651	3.5332	8.99e-11	9.51e-09	LOC103394526	NC_024324.1	12389174	12392028	+	1466	protein_coding	cyclin-dependent kinases regulatory subunit 1 && sp|Q0P5A5|CKS1_BOVIN Cyclin-dependent kinases regulatory subunit 1 OS=Bos taurus OX=9913 GN=CKS1B PE=3 SV=1 && -	-
103382361	111.322	42.4556	186.056	2.08514	5.71949	5.01424	113.278	4.27296	4.73514	9.21e-11	9.68e-09	LOC103382361	NC_024314.1	13082652	13084761	+	674	protein_coding	baculoviral IAP repeat-containing protein 5-like && sp|Q28ER3|BIR52_XENTR Baculoviral IAP repeat-containing protein 5.2 OS=Xenopus tropicalis OX=8364 GN=birc5.2 PE=2 SV=2 && PF00653:Inhibitor of Apoptosis domain	-
103384601	8.76551	9.09762	14.8845	66.7244	105.239	144.41	10.9159	105.458	-3.2722	9.36e-11	9.78e-09	LOC103384601	NC_024316.1	3138589	3153175	-	6608	protein_coding	adenosine receptor A1-like%2C transcript variant X2 && sp|P49892|AA1R_CHICK Adenosine receptor A1 OS=Gallus gallus OX=9031 GN=ADORA1 PE=2 SV=1 && PF00001:7 transmembrane receptor (rhodopsin family)	-
103383060	186.705	99.063	176.754	4.17027	12.5829	21.0598	154.174	12.6043	3.6093	1.21e-10	1.26e-08	LOC103383060	NC_024314.1	29145608	29151997	-	3183	protein_coding	transcription factor E2F7 && sp|Q5RIX9|E2F7_DANRE Transcription factor E2F7 OS=Danio rerio OX=7955 GN=e2f7 PE=1 SV=2 && PF02319:E2F/DP family winged-helix DNA-binding domain	E2F
103393193	184.076	370.981	357.228	1553.43	1300.61	1216.46	304.095	1356.83	-2.15839	1.38e-10	1.42e-08	LOC103393193	NC_024323.1	10900747	10906948	+	1730	protein_coding	cytoglobin-1-like%2C transcript variant X1 && sp|Q575T0|CYGB1_ORYLA Cytoglobin-1 OS=Oryzias latipes OX=8090 GN=cygb1 PE=2 SV=1 && PF00042:Globin	-
103396296	194.594	304.265	287.457	63.5967	42.3242	64.1823	262.105	56.7011	2.20527	1.43e-10	1.47e-08	snai2	NC_024326.1	6761912	6764325	+	1814	protein_coding	snail family transcriptional repressor 2 && sp|P97469|SNAI2_MOUSE Zinc finger protein SNAI2 OS=Mus musculus OX=10090 GN=Snai2 PE=1 SV=1 && PF00096:Zinc finger, C2H2 type	zf-C2H2
103391320	500.511	581.237	333.041	1465.85	2555.47	2280.48	471.596	2100.6	-2.15531	1.69e-10	1.73e-08	itm2a	NC_024321.1	18361031	18365100	+	1821	protein_coding	integral membrane protein 2A && sp|Q61500|ITM2A_MOUSE Integral membrane protein 2A OS=Mus musculus OX=10090 GN=Itm2a PE=2 SV=2 && PF04089:BRICHOS domain	-
103399856	910.737	1509.19	2182.44	240.833	53.7632	133.379	1534.12	142.658	3.42578	1.86e-10	1.88e-08	LOC103399856	NC_024308.1	13156709	13159290	+	1459	protein_coding	insulin-like growth factor-binding protein 1 && sp|P24591|IBP1_BOVIN Insulin-like growth factor-binding protein 1 OS=Bos taurus OX=9913 GN=IGFBP1 PE=2 SV=2 && PF00086:Thyroglobulin type-1 repeat|PF00219:Insulin-like growth factor binding protein	-
103389662	78.8896	190.039	85.586	2922.32	2895.2	423.202	118.172	2080.24	-4.13863	1.87e-10	1.88e-08	scarb1	NC_024320.1	12623001	12649878	-	2727	protein_coding	scavenger receptor class B member 1%2C transcript variant X2 && sp|Q8WTV0|SCRB1_HUMAN Scavenger receptor class B member 1 OS=Homo sapiens OX=9606 GN=SCARB1 PE=1 SV=1 && PF01130:CD36 family	-
103398979	79.7662	204.191	142.333	677.67	921.981	1679.77	142.097	1093.14	-2.94491	1.93e-10	1.94e-08	LOC103398979	NW_007585228.1	6108	7258	-	393	protein_coding	H-2 class II histocompatibility antigen%2C E-S beta chain-like && sp|O19477|HMR1_RAT Major histocompatibility complex class I-related gene protein OS=Rattus norvegicus OX=10116 GN=Mr1 PE=2 SV=2 && PF07654:Immunoglobulin C1-set domain	-
103398887	1475.24	999.727	1844.75	410.772	386.637	356.011	1439.9	384.474	1.90522	2e-10	1.99e-08	LOC103398887	NW_007585141.1	33908	36398	+	1594	protein_coding	tubulin beta-4B chain-like && sp|Q3MHM5|TBB4B_BOVIN Tubulin beta-4B chain OS=Bos taurus OX=9913 GN=TUBB4B PE=2 SV=1 && PF00091:Tubulin/FtsZ family, GTPase domain|PF03953:Tubulin C-terminal domain	-
103382344	241.052	190.039	449.326	12.5108	19.4463	46.131	293.472	26.0294	3.49078	2.26e-10	2.24e-08	dlgap5	NC_024314.1	13193538	13199653	+	3172	protein_coding	DLG associated protein 5%2C transcript variant X1 && sp|Q8K4R9|DLGP5_MOUSE Disks large-associated protein 5 OS=Mus musculus OX=10090 GN=Dlgap5 PE=1 SV=2 && PF03359:Guanylate-kinase-associated protein (GKAP) protein	-
103380195	317.312	187.007	622.359	36.4899	48.0437	51.1453	375.559	45.2263	3.05413	2.27e-10	2.24e-08	LOC103380195	NC_024312.1	12066824	12073499	+	2395	protein_coding	protein regulator of cytokinesis 1-like && sp|O43663|PRC1_HUMAN Protein regulator of cytokinesis 1 OS=Homo sapiens OX=9606 GN=PRC1 PE=1 SV=2 && PF03999:Microtubule associated protein (MAP65/ASE1 family)	-
103389823	657.413	2141.98	1381.47	161.598	249.37	134.382	1393.62	181.783	2.93919	2.37e-10	2.33e-08	LOC103389823	NC_024320.1	16384937	16394567	-	5536	protein_coding	inhibin beta B chain-like%2C transcript variant X1 && sp|P27093|INHBB_CHICK Inhibin beta B chain OS=Gallus gallus OX=9031 GN=INHBB PE=2 SV=2 && PF00688:TGF-beta propeptide|PF00019:Transforming growth factor beta like domain	-
103386609	162.162	95.0196	256.758	13.5534	20.5902	24.0684	171.313	19.404	3.14237	2.41e-10	2.36e-08	nuf2	NC_024317.1	16505914	16510674	+	1605	protein_coding	NUF2%2C NDC80 kinetochore complex component && sp|Q7ZW63|NUF2_DANRE Kinetochore protein Nuf2 OS=Danio rerio OX=7955 GN=nuf2 PE=2 SV=1 && PF18595:Designed helical repeat protein 10 domain|PF03800:Nuf2 family	-
103387010	94.6675	47.5098	98.6099	3.12771	5.71949	8.02279	80.2624	5.62333	3.83282	2.62e-10	2.55e-08	fbxo5	NC_024318.1	3315252	3318914	+	1641	protein_coding	F-box protein 5 && sp|Q0V967|FBX5_DANRE F-box only protein 5 OS=Danio rerio OX=7955 GN=fbxo5 PE=1 SV=2 && PF00646:F-box domain	-
103386922	159.532	80.8677	146.054	20.8514	19.4463	17.0484	128.818	19.1154	2.75489	2.9e-10	2.8e-08	polh	NC_024318.1	1176985	1181261	-	2404	protein_coding	DNA polymerase eta && sp|Q9JJN0|POLH_MOUSE DNA polymerase eta OS=Mus musculus OX=10090 GN=Polh PE=1 SV=1 && PF11799:impB/mucB/samB family C-terminal domain|PF00817:impB/mucB/samB family|PF18439:Ubiquitin-Binding Zinc Finger	-
103377360	1134.26	900.664	1069.82	321.111	192.175	328.934	1034.92	280.74	1.88131	3.13e-10	3.01e-08	LOC103377360	NC_024309.1	12078200	12088065	-	2077	protein_coding	carbonic anhydrase 1-like && sp|P83299|CAH1_CHIHA Carbonic anhydrase 1 OS=Chionodraco hamatus OX=36188 GN=ca1 PE=1 SV=1 && PF00194:Eukaryotic-type carbonic anhydrase	-
103394436	202.483	127.367	427	14.596	27.4535	30.0855	252.283	24.045	3.39188	3.17e-10	3.03e-08	kif14	NC_024308.1	3904876	3923661	-	5290	protein_coding	kinesin family member 14 && sp|Q15058|KIF14_HUMAN Kinesin-like protein KIF14 OS=Homo sapiens OX=9606 GN=KIF14 PE=1 SV=1 && PF16183:Kinesin-associated|PF00225:Kinesin motor domain|PF00498:FHA domain	-
103393418	99.9268	56.6074	213.035	0	5.71949	6.01709	123.19	3.91219	4.98211	3.21e-10	3.04e-08	LOC103393418	NC_024308.1	1724894	1728622	+	1396	protein_coding	nicotinamide riboside kinase 2%2C transcript variant X2 && sp|Q9NPI5|NRK2_HUMAN Nicotinamide riboside kinase 2 OS=Homo sapiens OX=9606 GN=NMRK2 PE=1 SV=1 && -	-
novel.622	712.636	171.844	201.871	21.8939	35.4608	26.0741	362.117	27.8096	3.70529	3.21e-10	3.04e-08	-	NC_024324.1	12169616	12171835	-	1631	-	- && - && -	-
103398381	346.238	156.681	343.274	40.6602	49.1876	53.151	282.064	47.6663	2.56561	3.37e-10	3.18e-08	e2f8	NW_007585109.1	549159	555549	-	3327	protein_coding	E2F transcription factor 8 && sp|F1QZ88|E2F8_DANRE Transcription factor E2F8 OS=Danio rerio OX=7955 GN=e2f8 PE=3 SV=1 && PF02319:E2F/DP family winged-helix DNA-binding domain	E2F
103395378	469.831	264.842	340.483	2006.94	1970.94	1093.11	358.386	1690.33	-2.23708	3.99e-10	3.74e-08	sc5d	NC_024325.1	12434586	12437548	-	1434	protein_coding	sterol-C5-desaturase && sp|Q9EQS5|SC5D_RAT Lathosterol oxidase OS=Rattus norvegicus OX=10116 GN=Sc5d PE=1 SV=1 && PF04116:Fatty acid hydroxylase superfamily	-
103383871	6191.96	3680.49	12562.5	1035.27	1135.89	1187.37	7478.33	1119.51	2.73986	4.01e-10	3.74e-08	LOC103383871	NC_024315.1	11361810	11379812	+	3215	protein_coding	von Willebrand factor A domain-containing protein 7-like && sp|Q0V8J4|VWA7_BOVIN von Willebrand factor A domain-containing protein 7 OS=Bos taurus OX=9913 GN=VWA7 PE=2 SV=1 && -	-
112487281	1671.58	2573.62	2894.11	3.12771	36.6047	2.0057	2379.77	13.9127	7.4248	4.2e-10	3.89e-08	LOC112487281	NC_024314.1	1547380	1548146	-	450	lncRNA	uncharacterized LOC112487281 && - && -	-
103397602	921.255	780.374	800.043	218.939	299.701	314.895	833.891	277.845	1.58581	4.35e-10	4.01e-08	gclm	NC_024308.1	9447648	9453906	-	2072	protein_coding	glutamate-cysteine ligase modifier subunit && sp|P48507|GSH0_HUMAN Glutamate--cysteine ligase regulatory subunit OS=Homo sapiens OX=9606 GN=GCLM PE=1 SV=1 && -	-
103384755	85.902	147.584	55.8169	530.667	909.398	486.382	96.4342	642.149	-2.7367	4.39e-10	4.03e-08	gata5	NC_024316.1	6373224	6381861	+	2470	protein_coding	GATA binding protein 5 && sp|P43695|GAT5A_XENLA GATA-binding factor 5-A OS=Xenopus laevis OX=8355 GN=gata5-a PE=2 SV=1 && PF05349:GATA-type transcription activator, N-terminal|PF00320:GATA zinc finger	zf-GATA
103389784	64.8648	167.801	22.3268	975.844	1339.5	1002.85	84.9974	1106.07	-3.70382	4.48e-10	4.08e-08	LOC103389784	NC_024320.1	15992897	15998298	+	2666	protein_coding	beta%2Cbeta-carotene 15%2C15'-dioxygenase-like%2C transcript variant X1 && sp|Q9I993|BCDO1_CHICK Beta,beta-carotene 15,15'-dioxygenase OS=Gallus gallus OX=9031 GN=BCO1 PE=1 SV=1 && PF03055:Retinal pigment epithelial membrane protein	-
112486250	187.582	131.41	295.83	26.0642	21.7341	40.114	204.941	29.3041	2.80234	4.49e-10	4.08e-08	knl1	NC_024313.1	11059368	11067628	-	5271	protein_coding	kinetochore scaffold 1 && sp|Q8NG31|KNL1_HUMAN Kinetochore scaffold 1 OS=Homo sapiens OX=9606 GN=KNL1 PE=1 SV=3 && PF18210:Knl1 RWD C-terminal domain	-
103388513	1645.29	263.831	434.442	42.7453	66.3461	46.131	781.186	51.7408	3.91758	4.52e-10	4.08e-08	LOC103388513	NC_024319.1	10471716	10473873	+	1885	protein_coding	chemokine-like receptor 1 && sp|B1PHQ8|CML1_PIG Chemokine-like receptor 1 OS=Sus scrofa OX=9823 GN=CMLKR1 PE=2 SV=1 && PF00001:7 transmembrane receptor (rhodopsin family)	-
103379180	2148.43	4611.48	1718.23	59.4264	296.269	34.0969	2826.05	129.931	4.44452	4.65e-10	4.18e-08	LOC103379180	NC_024311.1	14341279	14344356	-	962	protein_coding	cytochrome b-245 light chain && sp|Q95L73|CY24A_BISBI Cytochrome b-245 light chain OS=Bison bison OX=9901 GN=CYBA PE=2 SV=3 && PF05038:Cytochrome Cytochrome b558 alpha-subunit	-
103377709	774.871	145.562	158.148	9.38312	14.8707	27.0769	359.527	17.1102	4.39099	5.58e-10	5e-08	LOC103377709	NC_024310.1	2519689	2526370	+	3879	protein_coding	uncharacterized LOC103377709%2C transcript variant X1 && - && -	-
103390548	86.7786	61.6616	181.405	6.25541	11.439	8.02279	109.948	8.57239	3.68796	5.65e-10	5.03e-08	cenpi	NC_024321.1	1300389	1309013	-	2732	protein_coding	centromere protein I && sp|Q8AYS7|CENPI_CHICK Centromere protein I OS=Gallus gallus OX=9031 GN=CENPI PE=1 SV=1 && PF07778:Mis6	-
103396624	1549.74	2435.13	1356.35	5449.51	8620.41	9535.09	1780.41	7868.33	-2.14396	5.76e-10	5.1e-08	sdr16c5	NC_024326.1	12032263	12038255	-	1339	protein_coding	short chain dehydrogenase/reductase family 16C member 5%2C transcript variant X2 && sp|Q7TQA3|RDHE2_MOUSE Epidermal retinol dehydrogenase 2 OS=Mus musculus OX=10090 GN=Sdr16c5 PE=2 SV=1 && PF00106:short chain dehydrogenase	-
103388005	2671.73	417.48	397.231	83.4055	36.6047	44.1253	1162.15	54.7119	4.40833	6.26e-10	5.52e-08	LOC103388005	NC_024319.1	1224358	1230648	-	2368	protein_coding	solute carrier family 2%2C facilitated glucose transporter member 1-like && sp|Q9XSC2|GTR3_RABIT Solute carrier family 2, facilitated glucose transporter member 3 OS=Oryctolagus cuniculus OX=9986 GN=SLC2A3 PE=2 SV=2 && PF00083:Sugar (and other) transporter	-
103382264	513.659	458.924	380.485	1540.92	2459.38	1328.77	451.023	1776.36	-1.97738	6.32e-10	5.54e-08	LOC103382264	NC_024314.1	14336194	14339635	+	2838	protein_coding	protein phosphatase 1 regulatory subunit 3C-B-like && sp|Q6P950|PR3CB_DANRE Protein phosphatase 1 regulatory subunit 3C-B OS=Danio rerio OX=7955 GN=ppp1r3cb PE=2 SV=1 && PF03370:Carbohydrate/starch-binding module (family 21)	-
103389755	85.902	185.996	82.7951	1484.62	551.359	766.176	118.231	934.051	-2.98345	6.34e-10	5.54e-08	LOC103389755	NC_024320.1	15638929	15648835	-	4770	protein_coding	integral membrane protein GPR137B && sp|Q8BNQ3|G137B_MOUSE Integral membrane protein GPR137B OS=Mus musculus OX=10090 GN=Gpr137b PE=1 SV=2 && -	-
103379039	602.191	139.497	96.7494	12.5108	12.5829	18.0513	279.479	14.3817	4.279	6.52e-10	5.67e-08	sall1	NC_024311.1	11132926	11145136	+	6365	protein_coding	spalt like transcription factor 1%2C transcript variant X1 && sp|Q9NSC2|SALL1_HUMAN Sal-like protein 1 OS=Homo sapiens OX=9606 GN=SALL1 PE=1 SV=2 && -	zf-C2H2
103379529	88.5317	53.5749	150.706	3.12771	9.15118	8.02279	97.6041	6.76723	3.8565	6.99e-10	6.03e-08	gtse1	NC_024312.1	1653035	1658717	-	2901	protein_coding	G2 and S-phase expressed 1%2C transcript variant X1 && - && PF15259:G-2 and S-phase expressed 1	-
103378071	202.483	221.375	255.828	877.843	562.798	836.376	226.562	759.005	-1.74468	7.04e-10	6.03e-08	vtn	NC_024310.1	11024885	11029821	+	2711	protein_coding	vitronectin && sp|P22458|VTNC_RABIT Vitronectin OS=Oryctolagus cuniculus OX=9986 GN=VTN PE=1 SV=1 && PF00045:Hemopexin|PF01033:Somatomedin B domain	-
103397667	74.5068	129.388	66.9803	504.603	493.02	321.914	90.2918	439.846	-2.28635	7.04e-10	6.03e-08	LOC103397667	NC_024328.1	6848876	6856481	-	2638	protein_coding	UDP-N-acetylglucosamine/UDP-glucose/GDP-mannose transporter && sp|Q76EJ3|S35D2_HUMAN UDP-N-acetylglucosamine/UDP-glucose/GDP-mannose transporter OS=Homo sapiens OX=9606 GN=SLC35D2 PE=1 SV=1 && PF03151:Triose-phosphate Transporter family	-
103385521	2080.06	1444.5	1018.66	5830.04	5403.77	6235.71	1514.4	5823.18	-1.94296	7.21e-10	6.15e-08	LOC103385521	NC_024316.1	20068466	20072092	+	1498	protein_coding	cytosolic sulfotransferase 2-like && sp|Q7ZUS4|ST2S2_DANRE Cytosolic sulfotransferase 2 OS=Danio rerio OX=7955 GN=sult1st2 PE=1 SV=1 && PF00685:Sulfotransferase domain	-
103377435	298.904	242.603	257.688	768.373	694.346	642.826	266.398	701.848	-1.39688	7.25e-10	6.15e-08	LOC103377435	NC_024309.1	13867617	13871339	-	1904	protein_coding	gamma-glutamyl hydrolase-like && sp|Q92820|GGH_HUMAN Gamma-glutamyl hydrolase OS=Homo sapiens OX=9606 GN=GGH PE=1 SV=2 && -	-
103387069	1154.42	1363.63	1000.98	413.9	371.767	466.325	1173.01	417.33	1.4904	7.32e-10	6.18e-08	LOC103387069	NC_024318.1	4151210	4168219	+	2989	protein_coding	equilibrative nucleoside transporter 1%2C transcript variant X1 && sp|Q99808|S29A1_HUMAN Equilibrative nucleoside transporter 1 OS=Homo sapiens OX=9606 GN=SLC29A1 PE=1 SV=3 && PF01733:Nucleoside transporter	-
103388308	864.279	129.388	460.49	43.7879	36.6047	24.0684	484.719	34.8203	3.80037	7.45e-10	6.26e-08	LOC103388308	NC_024319.1	5770909	5775505	-	1895	protein_coding	B-cell receptor CD22-like && sp|O42414|NFASC_CHICK Neurofascin OS=Gallus gallus OX=9031 GN=NFASC PE=1 SV=1 && PF13895:Immunoglobulin domain|PF13927:Immunoglobulin domain	-
103398285	94.6675	38.4122	119.076	3.12771	5.71949	6.01709	84.0519	4.95476	4.08717	8.46e-10	7.08e-08	cenph	NC_024328.1	20114428	20116725	+	1286	protein_coding	centromere protein H%2C transcript variant X1 && - && PF05837:Centromere protein H (CENP-H)	-
103391581	2802.33	1973.17	3517.4	841.353	861.355	737.094	2764.3	813.267	1.76528	8.56e-10	7.13e-08	LOC103391581	NC_024322.1	1608498	1610647	-	898	protein_coding	cytochrome c && sp|Q6IQM2|CYC_DANRE Cytochrome c OS=Danio rerio OX=7955 GN=cyc PE=3 SV=3 && PF00034:Cytochrome c	-
novel.151	23.6669	8.08677	2.79085	196.003	112.102	257.732	11.5148	188.612	-4.02472	8.73e-10	7.23e-08	-	NC_024311.1	11501305	11502630	+	1326	-	- && - && -	-
103393244	557.487	259.788	334.902	62.5541	92.6557	61.1738	384.059	72.1279	2.41526	8.93e-10	7.37e-08	slc2a6	NC_024323.1	11418125	11422088	+	1676	protein_coding	solute carrier family 2 member 6 && sp|Q9UGQ3|GTR6_HUMAN Solute carrier family 2, facilitated glucose transporter member 6 OS=Homo sapiens OX=9606 GN=SLC2A6 PE=1 SV=2 && PF00083:Sugar (and other) transporter	-
103395639	640.759	831.927	317.226	3161.07	2805.98	2766.86	596.637	2911.3	-2.28696	9.33e-10	7.67e-08	slco2b1	NC_024325.1	16680571	16687175	+	2506	protein_coding	solute carrier organic anion transporter family member 2B1%2C transcript variant X1 && sp|Q9JHI3|SO2B1_RAT Solute carrier organic anion transporter family member 2B1 OS=Rattus norvegicus OX=10116 GN=Slco2b1 PE=1 SV=1 && PF03137:Organic Anion Transporter Polypeptide (OATP) family|PF07648:Kazal-type serine protease inhibitor domain	-
103382303	119.211	110.182	162.799	27.1068	29.7413	18.0513	130.731	24.9665	2.39342	9.61e-10	7.83e-08	ch25h	NC_024314.1	13676209	13677469	+	1029	protein_coding	cholesterol 25-hydroxylase && sp|Q5PRC0|CH25H_DANRE Cholesterol 25-hydroxylase-like protein OS=Danio rerio OX=7955 GN=ch25h PE=2 SV=1 && PF04116:Fatty acid hydroxylase superfamily	-
103398461	85.902	72.7809	255.828	11.4683	10.2951	8.02279	138.17	9.92871	3.80066	9.61e-10	7.83e-08	prc1	NW_007585112.1	129172	135532	-	2847	protein_coding	protein regulator of cytokinesis 1%2C transcript variant X1 && sp|O43663|PRC1_HUMAN Protein regulator of cytokinesis 1 OS=Homo sapiens OX=9606 GN=PRC1 PE=1 SV=2 && PF03999:Microtubule associated protein (MAP65/ASE1 family)	-
novel.156	16.6545	17.1844	5.58169	162.641	300.845	77.2194	13.1402	180.235	-3.77799	1.02e-09	8.26e-08	-	NC_024311.1	17190103	17191941	+	1802	-	- && - && -	-
103393137	852.884	954.239	1441.94	212.684	263.096	339.966	1083.02	271.915	1.99352	1.04e-09	8.36e-08	eftud2	NC_024323.1	9942576	9953489	+	3375	protein_coding	elongation factor Tu GTP binding domain containing 2 && sp|O08810|U5S1_MOUSE 116 kDa U5 small nuclear ribonucleoprotein component OS=Mus musculus OX=10090 GN=Eftud2 PE=1 SV=1 && PF14492:Elongation Factor G, domain II|PF03764:Elongation factor G, domain IV|PF00009:Elongation factor Tu GTP binding domain|PF03144:Elongation factor Tu domain 2|PF16004:116 kDa U5 small nuclear ribonucleoprotein compon…	-
103388845	106.939	121.302	297.69	12.5108	25.1657	12.0342	175.31	16.5703	3.41051	1.06e-09	8.52e-08	mad2l1	NC_024307.1	27722526	27724909	-	1062	protein_coding	mitotic arrest deficient 2 like 1 && sp|Q13257|MD2L1_HUMAN Mitotic spindle assembly checkpoint protein MAD2A OS=Homo sapiens OX=9606 GN=MAD2L1 PE=1 SV=1 && PF02301:HORMA domain	-
103383102	791.526	827.883	583.287	2146.65	2476.54	1869.31	734.232	2164.17	-1.55949	1.08e-09	8.63e-08	atrn	NC_024307.1	18327820	18380288	+	6849	protein_coding	attractin%2C transcript variant X3 && sp|O75882|ATRN_HUMAN Attractin OS=Homo sapiens OX=9606 GN=ATRN PE=1 SV=2 && PF13854:Kelch motif|PF01437:Plexin repeat|PF00059:Lectin C-type domain|PF00431:CUB domain	-
103394544	42.0745	500.369	77.2134	6.25541	2.28779	1.00285	206.552	3.18202	6.01976	1.08e-09	8.63e-08	LOC103394544	NC_024324.1	12254355	12255397	+	791	protein_coding	extracellular matrix protein 1-like && sp|Q62894|ECM1_RAT Extracellular matrix protein 1 OS=Rattus norvegicus OX=10116 GN=Ecm1 PE=1 SV=2 && PF05782:Extracellular matrix protein 1 (ECM1)	-
103383639	3943.6	6216.71	5022.59	13287.5	16954.8	18875.6	5060.97	16372.7	-1.69386	1.11e-09	8.83e-08	LOC103383639	NC_024315.1	7148858	7155836	+	1411	protein_coding	annexin A5%2C transcript variant X1 && sp|Q4R4H7|ANXA5_MACFA Annexin A5 OS=Macaca fascicularis OX=9541 GN=ANXA5 PE=2 SV=3 && PF00191:Annexin	-
103394430	88.5317	111.193	60.4684	457.688	355.752	297.846	86.731	370.429	-2.09585	1.12e-09	8.86e-08	mapk15	NC_024324.1	11039506	11044871	+	2350	protein_coding	mitogen-activated protein kinase 15 && sp|Q501Q9|MK15_XENLA Mitogen-activated protein kinase 15 OS=Xenopus laevis OX=8355 GN=mapk15 PE=1 SV=1 && PF00069:Protein kinase domain	-
103396046	134.989	133.432	467.002	18.7662	14.8707	27.0769	245.141	20.2379	3.59513	1.15e-09	9.05e-08	LOC103396046	NC_024326.1	3550146	3555904	-	2359	protein_coding	kinesin-like protein KIF2C%2C transcript variant X1 && sp|Q922S8|KIF2C_MOUSE Kinesin-like protein KIF2C OS=Mus musculus OX=10090 GN=Kif2c PE=1 SV=1 && PF00225:Kinesin motor domain	-
103396823	3315.99	4635.74	3089.47	9749.06	10921.9	11020.3	3680.4	10563.8	-1.52126	1.16e-09	9.05e-08	gtpbp4	NC_024326.1	15165220	15171231	+	2190	protein_coding	GTP binding protein 4 && sp|Q9BZE4|GTPB4_HUMAN GTP-binding protein 4 OS=Homo sapiens OX=9606 GN=GTPBP4 PE=1 SV=3 && PF06858:Nucleolar GTP-binding protein 1 (NOG1)|PF17835:NOG1 N-terminal helical domain|PF08155:NOGCT (NUC087) domain	-
103378702	156.026	95.0196	226.059	21.8939	11.439	26.0741	159.035	19.8023	2.99957	1.2e-09	9.35e-08	kif18a	NC_024311.1	3996947	4018587	+	3469	protein_coding	kinesin family member 18A%2C transcript variant X1 && sp|Q8NI77|KI18A_HUMAN Kinesin-like protein KIF18A OS=Homo sapiens OX=9606 GN=KIF18A PE=1 SV=2 && PF00225:Kinesin motor domain	-
103381669	755.587	1436.41	400.952	94.8737	149.851	98.2792	864.317	114.334	2.91901	1.24e-09	9.6e-08	LOC103381669	NC_024314.1	4697336	4705751	+	7133	protein_coding	cytochrome P450 26A1 && sp|P79739|CP26A_DANRE Cytochrome P450 26A1 OS=Danio rerio OX=7955 GN=cyp26a1 PE=1 SV=1 && PF00067:Cytochrome P450	-
103391444	125.347	80.8677	262.34	15.6385	12.5829	19.0541	156.185	15.7585	3.30597	1.32e-09	1.02e-07	spdl1	NC_024321.1	19844021	19849961	+	2068	protein_coding	spindle apparatus coiled-coil protein 1 && sp|Q5BIX7|SPDLA_XENLA Protein Spindly-A OS=Xenopus laevis OX=8355 GN=spdl1-a PE=2 SV=1 && -	-
103390484	1807.45	1048.25	918.189	134.491	197.894	37.1054	1257.96	123.164	3.35405	1.37e-09	1.05e-07	LOC103390484	NC_024320.1	28790902	28793674	+	1348	protein_coding	eosinophil peroxidase-like && sp|P11247|PERM_MOUSE Myeloperoxidase OS=Mus musculus OX=10090 GN=Mpo PE=1 SV=2 && PF03098:Animal haem peroxidase	-
103399040	725.784	771.276	1260.53	246.046	272.248	245.698	919.198	254.664	1.85202	1.43e-09	1.1e-07	LOC103399040	NW_007585350.1	7	3380	-	814	protein_coding	membrane-spanning 4-domains subfamily A member 4A-like && - && PF04103:CD20-like family	-
103384223	411.102	349.753	474.444	62.5541	122.397	49.1396	411.766	78.0302	2.40356	1.65e-09	1.26e-07	timm10	NC_024315.1	17728237	17730890	+	1759	protein_coding	translocase of inner mitochondrial membrane 10 && sp|Q6DI06|TIM10_DANRE Mitochondrial import inner membrane translocase subunit Tim10 OS=Danio rerio OX=7955 GN=timm10 PE=3 SV=1 && -	-
103384704	80.6427	62.6725	62.3289	282.536	194.463	297.846	68.548	258.282	-1.91312	1.72e-09	1.3e-07	myt1	NC_024316.1	5354300	5452497	+	6275	protein_coding	myelin transcription factor 1%2C transcript variant X1 && sp|Q8CFC2|MYT1_MOUSE Myelin transcription factor 1 OS=Mus musculus OX=10090 GN=Myt1 PE=1 SV=1 && PF08474:Myelin transcription factor 1|PF01530:Zinc finger, C2HC type	zf-C2HC
103394518	667.055	692.43	546.076	1653.51	1690.68	1436.08	635.187	1593.42	-1.32689	1.73e-09	1.3e-07	LOC103394518	NC_024324.1	12618056	12631005	+	5735	protein_coding	sorting nexin-27-like && sp|Q3UHD6|SNX27_MOUSE Sorting nexin-27 OS=Mus musculus OX=10090 GN=Snx27 PE=1 SV=2 && PF00788:Ras association (RalGDS/AF-6) domain|PF00787:PX domain|PF00595:PDZ domain	-
107988882	183.199	14.1519	427.93	2.08514	2.28779	5.01424	208.427	3.12906	6.04922	1.79e-09	1.35e-07	LOC107988882	NC_024314.1	1550401	1551214	-	471	lncRNA	uncharacterized LOC107988882 && - && -	-
103382633	336.596	393.219	264.2	1238.57	1150.76	848.41	331.338	1079.25	-1.70388	1.81e-09	1.36e-07	LOC103382633	NC_024314.1	18621756	18624454	+	1576	protein_coding	uncharacterized LOC103382633 && - && PF09588:YqaJ-like viral recombinase domain	-
103394745	1209.64	978.499	1848.47	217.897	308.852	387.1	1345.54	304.616	2.14302	1.92e-09	1.44e-07	banf1	NC_024325.1	5522	8249	-	1429	protein_coding	barrier to autointegration factor 1 && sp|Q6P026|BAF_DANRE Barrier-to-autointegration factor OS=Danio rerio OX=7955 GN=banf1 PE=1 SV=1 && -	-
103397679	26529.7	19448.7	10293.6	88530.8	76102.4	110771	18757.3	91801.3	-2.29106	1.93e-09	1.44e-07	selenop	NC_024328.1	6210965	6214243	-	2322	protein_coding	selenoprotein P%2C transcript variant X1 && sp|Q98SV1|SELPA_DANRE Selenoprotein Pa OS=Danio rerio OX=7955 GN=sepp1a PE=1 SV=3 && PF04592:Selenoprotein P, N terminal region	-
103397415	756.464	865.285	796.322	1829.71	2263.77	1813.15	806.023	1968.88	-1.28851	2.06e-09	1.52e-07	LOC103397415	NC_024328.1	2688308	2692891	+	1316	protein_coding	cytochrome b ascorbate-dependent protein 3%2C transcript variant X1 && sp|A3KPR5|CYAC3_DANRE Lysosomal membrane ascorbate-dependent ferrireductase CYB561A3 OS=Danio rerio OX=7955 GN=cyb561a3a PE=2 SV=1 && PF03188:Eukaryotic cytochrome b561	-
103381459	107.816	536.759	65.1198	4940.73	8751.96	1899.4	236.565	5197.36	-4.45811	2.65e-09	1.95e-07	vat1	NC_024314.1	1380385	1386397	-	1404	protein_coding	vesicle amine transport 1 && sp|Q8JFV8|VAT1_DANRE Synaptic vesicle membrane protein VAT-1 homolog OS=Danio rerio OX=7955 GN=vat1 PE=2 SV=1 && PF08240:Alcohol dehydrogenase GroES-like domain|PF13602:Zinc-binding dehydrogenase	-
103395349	406.72	39.423	94.8888	8.34055	4.57559	3.00855	180.344	5.30823	5.08773	3.02e-09	2.22e-07	LOC103395349	NC_024325.1	12053336	12061585	+	2937	protein_coding	ATP-sensitive inward rectifier potassium channel 1-like%2C transcript variant X2 && sp|P48048|KCNJ1_HUMAN ATP-sensitive inward rectifier potassium channel 1 OS=Homo sapiens OX=9606 GN=KCNJ1 PE=1 SV=1 && PF01007:Inward rectifier potassium channel transmembrane domain|PF17655:Inward rectifier potassium channel C-terminal domain	-
novel.669	166.545	223.397	135.821	553.604	645.158	517.47	175.254	572.077	-1.70762	3.08e-09	2.25e-07	-	NC_024326.1	339882	343884	+	1393	-	- && sp|Q9NKW1|MFEA_DICDI Peroxisomal multifunctional enzyme A OS=Dictyostelium discoideum OX=44689 GN=mfeA PE=2 SV=1 && -	-
103399902	13.1483	9.09762	2.79085	92.7886	140.699	63.1795	8.34558	98.8892	-3.56085	3.13e-09	2.28e-07	LOC103399902	NC_024308.1	14081303	14085312	+	2166	protein_coding	alanine aminotransferase 2-like%2C transcript variant X1 && sp|Q6GM82|ALAT2_XENLA Alanine aminotransferase 2 OS=Xenopus laevis OX=8355 GN=gpt2 PE=2 SV=1 && PF00155:Aminotransferase class I and II	-
103386285	139.372	64.6942	122.797	12.5108	12.5829	19.0541	108.954	14.7159	2.88554	3.29e-09	2.39e-07	traip	NC_024317.1	10661399	10668810	-	4745	protein_coding	TRAF interacting protein && sp|Q6NRV0|TRAIP_XENLA E3 ubiquitin-protein ligase TRAIP OS=Xenopus laevis OX=8355 GN=traip PE=1 SV=2 && PF13639:Ring finger domain	-
103377259	313.805	490.261	252.107	1312.59	1292.6	1192.39	352.057	1265.86	-1.84693	3.35e-09	2.42e-07	LOC103377259	NC_024309.1	10734563	10744035	-	6865	protein_coding	xin actin-binding repeat-containing protein 1-like && sp|Q5PZ43|XIRP1_DANRE Xin actin-binding repeat-containing protein 1 OS=Danio rerio OX=7955 GN=xirp1 PE=1 SV=1 && -	-
103389722	79.7662	48.5206	126.518	4.17027	10.2951	7.01994	84.9351	7.16176	3.57782	3.44e-09	2.47e-07	cenpl	NC_024320.1	14668123	14670471	+	1244	protein_coding	centromere protein L && sp|Q6DRD4|CENPL_DANRE Centromere protein L OS=Danio rerio OX=7955 GN=cenpl PE=2 SV=1 && PF13092:Kinetochore complex Sim4 subunit Fta1	-
103386252	72.7537	78.846	508.864	7.29798	2.28779	11.0313	220.155	6.87237	4.99093	3.45e-09	2.48e-07	LOC103386252	NC_024317.1	9462815	9468895	+	3375	protein_coding	rac GTPase-activating protein 1-like%2C transcript variant X2 && sp|Q9H0H5|RGAP1_HUMAN Rac GTPase-activating protein 1 OS=Homo sapiens OX=9606 GN=RACGAP1 PE=1 SV=1 && PF00130:Phorbol esters/diacylglycerol binding domain (C1 domain)|PF00620:RhoGAP domain	-
103376998	74.5068	700.517	255.828	19.8088	12.5829	2.0057	343.617	11.4658	4.90833	3.47e-09	2.48e-07	pi15	NC_024309.1	4526268	4532068	+	3632	protein_coding	peptidase inhibitor 15 && sp|Q7T141|PI15A_DANRE Peptidase inhibitor 15-A OS=Danio rerio OX=7955 GN=pi15a PE=3 SV=2 && PF00188:Cysteine-rich secretory protein family	-
103380941	5346.09	2994.13	3215.06	762.118	1173.64	1044.97	3851.76	993.575	1.95498	3.49e-09	2.48e-07	pdia6	NC_024313.1	6083956	6088814	-	1997	protein_coding	protein disulfide isomerase family A member 6%2C transcript variant X1 && sp|Q15084|PDIA6_HUMAN Protein disulfide-isomerase A6 OS=Homo sapiens OX=9606 GN=PDIA6 PE=1 SV=1 && PF00085:Thioredoxin	-
103387164	164.792	86.9328	163.73	553.604	603.978	468.33	138.485	541.971	-1.96661	3.53e-09	2.5e-07	ankrd1	NC_024318.1	5709633	5715115	-	3033	protein_coding	ankyrin repeat domain 1 && sp|Q865U8|ANKR1_PIG Ankyrin repeat domain-containing protein 1 OS=Sus scrofa OX=9823 GN=ANKRD1 PE=2 SV=1 && PF12796:Ankyrin repeats (3 copies)	-
103377826	944.046	193.072	331.181	52.1284	30.8852	53.151	489.433	45.3882	3.42951	3.58e-09	2.53e-07	acsl3	NC_024310.1	6388016	6404828	-	3268	protein_coding	acyl-CoA synthetase long chain family member 3 && sp|Q63151|ACSL3_RAT Long-chain-fatty-acid--CoA ligase 3 OS=Rattus norvegicus OX=10116 GN=Acsl3 PE=1 SV=1 && PF00501:AMP-binding enzyme|PF13193:AMP-binding enzyme C-terminal domain	-
103393691	126.223	73.7918	242.804	7.29798	11.439	20.057	147.606	12.9313	3.50901	3.61e-09	2.54e-07	spc24	NC_024323.1	15639001	15641582	-	1131	protein_coding	SPC24%2C NDC80 kinetochore complex component%2C transcript variant X1 && sp|Q8NBT2|SPC24_HUMAN Kinetochore protein Spc24 OS=Homo sapiens OX=9606 GN=SPC24 PE=1 SV=2 && PF08286:Spc24 subunit of Ndc80	-
103382241	636.376	787.449	513.516	2183.14	2646.98	1654.7	645.78	2161.61	-1.74309	4.05e-09	2.83e-07	LOC103382241	NC_024314.1	14478944	14487070	+	4333	protein_coding	SUN domain-containing protein 1-like && sp|Q9D666|SUN1_MOUSE SUN domain-containing protein 1 OS=Mus musculus OX=10090 GN=Sun1 PE=1 SV=2 && PF07738:Sad1 / UNC-like C-terminal	-
103383762	415.485	351.775	1169.36	40.6602	82.3606	94.2678	645.542	72.4295	3.15598	4.4e-09	3.07e-07	smc2	NC_024315.1	8894197	8901212	-	4119	protein_coding	structural maintenance of chromosomes 2 && sp|P50533|SMC2_XENLA Structural maintenance of chromosomes protein 2 OS=Xenopus laevis OX=8355 GN=smc2 PE=1 SV=1 && PF02463:RecF/RecN/SMC N terminal domain|PF06470:SMC proteins Flexible Hinge Domain	-
103395509	5147.98	5139.14	3749.97	15976.3	23127.3	12139.5	4679.03	17081	-1.8681	4.51e-09	3.14e-07	sod1	NC_024325.1	14614102	14616755	-	804	protein_coding	superoxide dismutase 1 && sp|O73872|SODC_DANRE Superoxide dismutase [Cu-Zn] OS=Danio rerio OX=7955 GN=sod1 PE=2 SV=1 && PF00080:Copper/zinc superoxide dismutase (SODC)	-
103389747	7.01241	15.1627	13.9542	403.474	537.632	31.0883	12.0431	324.065	-4.75304	4.71e-09	3.26e-07	LOC103389747	NC_024320.1	15517748	15525146	+	2652	protein_coding	uncharacterized LOC103389747 && - && PF00059:Lectin C-type domain	-
103377182	12057.8	15532.7	13483.5	34586.2	40847.4	30103.5	13691.3	35179	-1.36146	5.87e-09	4.05e-07	LOC103377182	NC_024309.1	9861773	9866934	+	2009	protein_coding	eukaryotic translation initiation factor 5A-1-like && sp|P10160|IF5A1_RABIT Eukaryotic translation initiation factor 5A-1 OS=Oryctolagus cuniculus OX=9986 GN=EIF5A PE=1 SV=2 && PF01287:Eukaryotic elongation factor 5A hypusine, DNA-binding OB fold	-
103386930	265.595	31.3362	106.052	3.12771	3.43169	8.02279	134.328	4.86073	4.78028	5.95e-09	4.09e-07	LOC103386930	NC_024318.1	1172463	1176842	-	2405	protein_coding	uncharacterized LOC103386930%2C transcript variant X1 && - && -	-
103390730	1690.87	3098.24	1892.19	7844.29	7741.9	6926.68	2227.1	7504.29	-1.75269	6.52e-09	4.46e-07	LOC103390730	NC_024321.1	7387619	7394345	+	1949	protein_coding	phosphoethanolamine N-methyltransferase 3-like%2C transcript variant X3 && sp|Q9C6B9|PEAM3_ARATH Phosphoethanolamine N-methyltransferase 3 OS=Arabidopsis thaliana OX=3702 GN=NMT3 PE=2 SV=2 && PF13489:Methyltransferase domain|PF13649:Methyltransferase domain	-
103396117	539.079	426.577	415.836	1241.7	1782.19	1181.36	460.497	1401.75	-1.60547	6.99e-09	4.77e-07	gk5	NC_024326.1	4375190	4381284	+	2950	protein_coding	glycerol kinase 5%2C transcript variant X1 && sp|A0JPE9|GLPK5_DANRE Putative glycerol kinase 5 OS=Danio rerio OX=7955 GN=gk5 PE=2 SV=1 && PF00370:FGGY family of carbohydrate kinases, N-terminal domain|PF02782:FGGY family of carbohydrate kinases, C-terminal domain	-
103386109	448.794	312.352	555.379	1290.7	1395.55	1743.95	438.841	1476.74	-1.7503	7.07e-09	4.8e-07	LOC103386109	NC_024317.1	6279897	6302327	+	7454	protein_coding	vitamin D3 receptor B && sp|Q1L673|VDRB_DANRE Vitamin D3 receptor B OS=Danio rerio OX=7955 GN=vdrb PE=2 SV=2 && -	THR-like
103380983	776.624	66.7159	232.571	23.9791	8.00728	4.0114	358.637	11.9993	4.90139	7.09e-09	4.8e-07	LOC103380983	NC_024313.1	7156359	7158884	-	1217	protein_coding	uncharacterized LOC103380983 && - && -	-
103399993	79.7662	85.922	240.013	9.38312	14.8707	15.0427	135.234	13.0988	3.36904	7.14e-09	4.82e-07	ect2	NC_024308.1	16076332	16108262	+	4538	protein_coding	epithelial cell transforming 2 && sp|Q9H8V3|ECT2_HUMAN Protein ECT2 OS=Homo sapiens OX=9606 GN=ECT2 PE=1 SV=4 && PF12738:twin BRCT domain|PF00621:RhoGEF domain	-
103384568	426.88	252.712	344.204	64.6393	105.239	89.2535	341.266	86.3771	1.98406	7.18e-09	4.82e-07	gss	NC_024316.1	2678123	2684141	-	1929	protein_coding	glutathione synthetase && sp|Q8HXX5|GSHB_MACFA Glutathione synthetase OS=Macaca fascicularis OX=9541 GN=GSS PE=2 SV=1 && PF03917:Eukaryotic glutathione synthase, ATP binding domain|PF03199:Eukaryotic glutathione synthase	-
103393408	137.619	81.8786	209.314	17.7237	19.4463	26.0741	142.937	21.0813	2.75998	7.66e-09	5.13e-07	LOC103393408	NC_024323.1	13046253	13048940	+	1458	protein_coding	uncharacterized LOC103393408%2C transcript variant X2 && - && -	-
103394701	99.9268	115.237	116.285	271.068	390.069	333.949	110.483	331.695	-1.5862	7.83e-09	5.22e-07	LOC103394701	NC_024324.1	14715737	14728720	-	3240	protein_coding	nuclear receptor subfamily 1 group D member 2-like%2C transcript variant X1 && sp|Q14995|NR1D2_HUMAN Nuclear receptor subfamily 1 group D member 2 OS=Homo sapiens OX=9606 GN=NR1D2 PE=1 SV=3 && PF00104:Ligand-binding domain of nuclear hormone receptor|PF00105:Zinc finger, C4 type (two domains)	THR-like
103392396	206.866	210.256	208.383	461.858	716.08	671.909	208.502	616.615	-1.56417	7.88e-09	5.24e-07	ormdl1	NC_024322.1	16285824	16289210	+	1427	protein_coding	ORMDL sphingolipid biosynthesis regulator 1%2C transcript variant X1 && sp|Q8JFB7|ORML1_DANRE ORM1-like protein 1 OS=Danio rerio OX=7955 GN=ormdl1 PE=2 SV=1 && PF04061:ORMDL family	-
103382698	21.9138	26.282	29.769	103.214	116.678	204.581	25.9883	141.491	-2.44704	8.11e-09	5.37e-07	syt16	NC_024307.1	17103944	17124842	-	5192	protein_coding	synaptotagmin 16%2C transcript variant X2 && sp|Q17RD7|SYT16_HUMAN Synaptotagmin-16 OS=Homo sapiens OX=9606 GN=SYT16 PE=1 SV=2 && PF00168:C2 domain	-
103395965	572.388	979.51	689.339	3394.6	5441.52	2175.18	747.079	3670.43	-2.29675	8.2e-09	5.41e-07	tm6sf2	NC_024326.1	2420778	2425298	-	2694	protein_coding	transmembrane 6 superfamily member 2%2C transcript variant X1 && sp|Q8R1J1|TM6S2_MOUSE Transmembrane 6 superfamily member 2 OS=Mus musculus OX=10090 GN=Tm6sf2 PE=2 SV=2 && PF10914:Protein of unknown function (DUF2781)	-
103391373	937.91	1141.25	894.001	2379.14	2173.41	2342.65	991.052	2298.4	-1.21386	8.81e-09	5.79e-07	LOC103391373	NC_024321.1	18689856	18694574	+	2336	protein_coding	E3 ubiquitin-protein ligase XIAP-like && sp|Q5BKL8|XIAP_XENTR E3 ubiquitin-protein ligase XIAP OS=Xenopus tropicalis OX=8364 GN=xiap PE=2 SV=1 && PF00653:Inhibitor of Apoptosis domain|PF13920:Zinc finger, C3HC4 type (RING finger)	-
103378846	120.088	96.0304	464.211	19.8088	8.00728	18.0513	226.776	15.2891	3.88608	8.85e-09	5.79e-07	LOC103378846	NC_024311.1	7102673	7135554	+	7338	protein_coding	ephrin type-A receptor 6-like%2C transcript variant X1 && sp|Q62413|EPHA6_MOUSE Ephrin type-A receptor 6 OS=Mus musculus OX=10090 GN=Epha6 PE=1 SV=2 && PF07714:Protein tyrosine kinase|PF14575:Ephrin type-A receptor 2 transmembrane domain|PF00536:SAM domain (Sterile alpha motif)|PF01404:Ephrin receptor ligand binding domain|PF00041:Fibronectin type III domain	-
103390387	154.273	153.649	114.425	715.202	358.04	610.735	140.782	561.326	-1.99586	9.06e-09	5.91e-07	il7r	NC_024320.1	27112789	27117122	-	2040	protein_coding	interleukin 7 receptor && sp|Q38IC7|IL7RA_MACFA Interleukin-7 receptor subunit alpha OS=Macaca fascicularis OX=9541 GN=IL7R PE=2 SV=1 && -	-
103393542	1036.08	566.074	325.599	2916.06	4932.49	3471.86	642.585	3773.47	-2.55368	9.16e-09	5.96e-07	LOC103393542	NC_024323.1	14051093	14060417	-	2815	protein_coding	pyruvate dehydrogenase (acetyl-transferring) kinase isozyme 2%2C mitochondrial-like && sp|Q9JK42|PDK2_MOUSE [Pyruvate dehydrogenase (acetyl-transferring)] kinase isozyme 2, mitochondrial OS=Mus musculus OX=10090 GN=Pdk2 PE=1 SV=2 && PF02518:Histidine kinase-, DNA gyrase B-, and HSP90-like ATPase|PF10436:Mitochondrial branched-chain alpha-ketoacid dehydrogenase kinase	-
103382465	144.631	95.0196	255.828	13.5534	14.8707	31.0883	165.159	19.8375	3.05296	1.09e-08	7.04e-07	ncaph2	NC_024314.1	16420598	16426760	-	2074	protein_coding	non-SMC condensin II complex subunit H2 && sp|Q5RH01|CNDH2_DANRE Condensin-2 complex subunit H2 OS=Danio rerio OX=7955 GN=ncaph2 PE=2 SV=1 && PF06278:Condensin II complex subunit CAP-H2 or CNDH2, N-terminal|PF16858:Condensin II complex subunit CAP-H2 or CNDH2, C-term	-
103392215	536.449	357.84	685.618	113.64	167.009	109.311	526.636	129.987	2.02011	1.14e-08	7.38e-07	LOC103392215	NC_024322.1	13399210	13400943	+	1377	protein_coding	tubulin alpha chain-like && sp|P08537|TBA_XENLA Tubulin alpha chain OS=Xenopus laevis OX=8355 GN=tuba PE=2 SV=2 && PF00091:Tubulin/FtsZ family, GTPase domain|PF03953:Tubulin C-terminal domain	-
103392129	2571.8	7438.82	4312.79	26996.3	23292	20025.9	4774.47	23438.1	-2.2955	1.17e-08	7.54e-07	pdzk1	NC_024322.1	11088920	11092816	+	2041	protein_coding	PDZ domain containing 1 && sp|Q3T0X8|NHRF3_BOVIN Na(+)/H(+) exchange regulatory cofactor NHE-RF3 OS=Bos taurus OX=9913 GN=PDZK1 PE=2 SV=1 && PF00595:PDZ domain	-
103377130	550.474	703.549	568.403	1380.36	1540.83	1396.97	607.475	1439.39	-1.24488	1.18e-08	7.59e-07	pde7a	NC_024309.1	9013097	9033214	+	4212	protein_coding	phosphodiesterase 7A%2C transcript variant X1 && sp|Q13946|PDE7A_HUMAN High affinity cAMP-specific 3',5'-cyclic phosphodiesterase 7A OS=Homo sapiens OX=9606 GN=PDE7A PE=1 SV=2 && PF00233:3'5'-cyclic nucleotide phosphodiesterase	-
103391957	94.6675	45.4881	272.573	8.34055	3.43169	10.0285	137.576	7.26691	4.23359	1.2e-08	7.62e-07	LOC103391957	NC_024322.1	8849211	8852681	-	2539	protein_coding	gap junction beta-2 protein-like && sp|O93533|CXB6_CHICK Gap junction beta-6 protein OS=Gallus gallus OX=9031 GN=GJB6 PE=2 SV=1 && PF00029:Connexin	-
novel.397	109.569	152.638	106.982	369.069	344.313	349.994	123.063	354.459	-1.5281	1.2e-08	7.62e-07	-	NC_024319.1	497133	498233	+	529	-	- && - && -	-
103389590	130.606	61.6616	184.196	16.6811	18.3024	11.0313	125.488	15.3383	3.03737	1.25e-08	7.92e-07	LOC103389590	NC_024320.1	11359881	11364839	+	1927	protein_coding	uncharacterized LOC103389590%2C transcript variant X1 && - && PF15254:Coiled-coil domain-containing protein 14	-
103379354	29.8027	32.3471	12.0937	134.491	177.304	121.345	24.7478	144.38	-2.54534	1.26e-08	7.94e-07	thsd4	NC_024311.1	17144943	17186911	+	4808	protein_coding	thrombospondin type 1 domain containing 4 && sp|Q6ZMP0|THSD4_HUMAN Thrombospondin type-1 domain-containing protein 4 OS=Homo sapiens OX=9606 GN=THSD4 PE=2 SV=2 && -	-
103388680	3245.87	3663.31	3616.01	7134.3	9158.04	7728.96	3508.39	8007.1	-1.19047	1.29e-08	8.12e-07	LOC103388680	NC_024319.1	13745202	13769379	-	1658	protein_coding	eukaryotic translation initiation factor 3 subunit E-A && sp|Q6DRI1|EI3EA_DANRE Eukaryotic translation initiation factor 3 subunit E-A OS=Danio rerio OX=7955 GN=eif3ea PE=2 SV=2 && PF01399:PCI domain|PF09440:eIF3 subunit 6 N terminal domain	-
103398021	23.6669	118.269	16.7451	9629.16	33472.7	651.852	52.8937	14584.6	-8.10791	1.35e-08	8.46e-07	LOC103398021	NC_024328.1	14607832	14609474	+	1354	protein_coding	natterin-3-like && sp|Q66S17|NATT3_THANI Natterin-3 OS=Thalassophryne nattereri OX=289382 PE=1 SV=1 && -	-
103382739	87.6551	47.5098	117.216	4.17027	8.00728	12.0342	84.1268	8.07058	3.37898	1.46e-08	9.12e-07	foxm1	NC_024314.1	20526834	20533209	+	3622	protein_coding	forkhead box M1 && sp|P97691|FOXM1_RAT Forkhead box protein M1 OS=Rattus norvegicus OX=10116 GN=Foxm1 PE=2 SV=2 && PF00250:Forkhead domain	Fork head
103381594	294.521	240.581	407.464	79.2352	102.951	80.2279	314.189	87.4713	1.84651	1.47e-08	9.14e-07	pelo	NC_024314.1	3331639	3337595	-	1600	protein_coding	pelota mRNA surveillance and ribosome rescue factor && sp|Q7ZWC4|PELO_DANRE Protein pelota homolog OS=Danio rerio OX=7955 GN=pelo PE=2 SV=1 && PF03465:eRF1 domain 3|PF03463:eRF1 domain 1|PF03464:eRF1 domain 2	-
103379858	53.4696	58.6291	110.704	9.38312	9.15118	5.01424	74.2674	7.84951	3.24856	1.47e-08	9.15e-07	ska1	NC_024312.1	6018491	6021809	+	1007	protein_coding	spindle and kinetochore associated complex subunit 1 && sp|Q6DHG8|SKA1_DANRE Spindle and kinetochore-associated protein 1 OS=Danio rerio OX=7955 GN=ska1 PE=2 SV=1 && PF07160:Spindle and kinetochore-associated protein 1	-
103383677	2512.2	788.46	1410.31	234.578	354.608	216.615	1570.32	268.6	2.54816	1.48e-08	9.16e-07	ugdh	NC_024315.1	7778685	7784311	+	2002	protein_coding	UDP-glucose 6-dehydrogenase && sp|O60701|UGDH_HUMAN UDP-glucose 6-dehydrogenase OS=Homo sapiens OX=9606 GN=UGDH PE=1 SV=1 && PF00984:UDP-glucose/GDP-mannose dehydrogenase family, central domain|PF03720:UDP-glucose/GDP-mannose dehydrogenase family, UDP binding domain|PF03721:UDP-glucose/GDP-mannose dehydrogenase family, NAD binding domain	-
103380749	749.451	707.593	598.172	2360.38	1652.93	1664.73	685.072	1892.68	-1.46611	1.5e-08	9.28e-07	arhgap18	NC_024313.1	3744816	3760417	+	3307	protein_coding	Rho GTPase activating protein 18%2C transcript variant X1 && sp|Q8N392|RHG18_HUMAN Rho GTPase-activating protein 18 OS=Homo sapiens OX=9606 GN=ARHGAP18 PE=1 SV=3 && PF00620:RhoGAP domain	-
103396603	843.242	966.369	1431.7	190.79	367.191	227.647	1080.44	261.876	2.04552	1.53e-08	9.42e-07	prmt5	NC_024326.1	11786872	11792108	+	2474	protein_coding	protein arginine methyltransferase 5 && sp|Q5R698|ANM5_PONAB Protein arginine N-methyltransferase 5 OS=Pongo abelii OX=9601 GN=PRMT5 PE=2 SV=3 && PF17285:PRMT5 TIM barrel domain|PF05185:PRMT5 arginine-N-methyltransferase|PF17286:PRMT5 oligomerisation domain	-
103386824	154.273	144.551	515.376	14.596	18.3024	39.1111	271.4	24.0031	3.4959	1.54e-08	9.42e-07	ube2c	NC_024317.1	20179707	20182598	-	735	protein_coding	ubiquitin conjugating enzyme E2 C && sp|P56616|UBE2C_XENLA Ubiquitin-conjugating enzyme E2 C OS=Xenopus laevis OX=8355 GN=ube2c PE=1 SV=1 && PF00179:Ubiquitin-conjugating enzyme	-
103394075	466.325	1695.19	8632.09	58.3838	53.7632	25.0712	3597.87	45.7394	6.29796	1.58e-08	9.62e-07	b3gnt7	NC_024308.1	3102754	3105913	-	2157	protein_coding	UDP-GlcNAc_betaGal beta-1%2C3-N-acetylglucosaminyltransferase 7 && sp|Q8NFL0|B3GN7_HUMAN UDP-GlcNAc:betaGal beta-1,3-N-acetylglucosaminyltransferase 7 OS=Homo sapiens OX=9606 GN=B3GNT7 PE=1 SV=1 && PF01762:Galactosyltransferase	-
103391527	1157.05	1538.51	811.206	4850.03	5407.2	3184.04	1168.92	4480.43	-1.93854	1.6e-08	9.71e-07	LOC103391527	NC_024322.1	976966	999373	-	2941	protein_coding	amine oxidase [flavin-containing]%2C transcript variant X2 && sp|P49253|AOF_ONCMY Amine oxidase [flavin-containing] OS=Oncorhynchus mykiss OX=8022 GN=mao PE=2 SV=2 && PF01593:Flavin containing amine oxidoreductase	-
103394354	318.188	293.145	302.342	751.692	941.428	667.897	304.558	787.006	-1.36908	1.6e-08	9.71e-07	fbxl2	NC_024324.1	9959215	9979038	-	3505	protein_coding	F-box and leucine rich repeat protein 2%2C transcript variant X1 && sp|Q8BH16|FBXL2_MOUSE F-box/LRR-repeat protein 2 OS=Mus musculus OX=10090 GN=Fbxl2 PE=1 SV=1 && PF12937:F-box-like	-
103393845	200.73	170.833	615.847	38.575	19.4463	45.1282	329.137	34.3832	3.25593	1.61e-08	9.74e-07	LOC103393845	NC_024324.1	719032	724911	-	3501	protein_coding	carboxy-terminal kinesin 2%2C transcript variant X2 && sp|P79955|CTK2_XENLA Carboxy-terminal kinesin 2 OS=Xenopus laevis OX=8355 PE=2 SV=1 && PF00225:Kinesin motor domain	-
103377224	362.892	818.786	465.141	1938.13	2548.6	2176.18	548.94	2220.97	-2.01698	1.66e-08	1e-06	LOC103377224	NC_024309.1	10445392	10447621	+	1138	protein_coding	uncharacterized LOC103377224 && - && -	-
103390034	2315.85	3228.64	1869.87	14972.3	6567.12	10880.9	2471.45	10806.8	-2.12858	1.67e-08	1e-06	dab2	NC_024320.1	19286807	19295554	+	3442	protein_coding	DAB2%2C clathrin adaptor protein%2C transcript variant X2 && sp|P98082|DAB2_HUMAN Disabled homolog 2 OS=Homo sapiens OX=9606 GN=DAB2 PE=1 SV=3 && PF00640:Phosphotyrosine interaction domain (PTB/PID)	-
103389728	188.458	66.7159	139.542	3.12771	8.00728	19.0541	131.572	10.063	3.70212	1.67e-08	1e-06	donson	NC_024320.1	15087100	15091532	-	2448	protein_coding	downstream neighbor of SON && sp|Q6P1U0|DONS_XENTR Protein downstream neighbor of son homolog OS=Xenopus tropicalis OX=8364 GN=donson PE=2 SV=1 && -	-
103394763	4.38276	4.04339	1.86056	118.853	203.614	16.0456	3.4289	112.837	-5.03898	1.7e-08	1.01e-06	LOC103394763	NC_024325.1	1195639	1204689	-	3871	protein_coding	solute carrier family 22 member 5-like && sp|Q9Z0E8|S22A5_MOUSE Solute carrier family 22 member 5 OS=Mus musculus OX=10090 GN=Slc22a5 PE=1 SV=1 && PF00083:Sugar (and other) transporter	-
103387055	68.371	34.3688	66.9803	6.25541	2.28779	4.0114	56.5734	4.18487	3.74755	1.71e-08	1.02e-06	bora	NC_024318.1	3996886	4000612	+	2374	protein_coding	bora%2C aurora kinase A activator%2C transcript variant X1 && sp|Q5U3U6|BORA_DANRE Protein aurora borealis OS=Danio rerio OX=7955 GN=bora PE=2 SV=1 && PF15280:Protein aurora borealis N-terminus	-
103379269	2674.36	2839.47	2917.37	5472.44	6285.72	5640.02	2810.4	5799.39	-1.04512	1.73e-08	1.02e-06	ipo7	NC_024311.1	15595490	15608937	-	4619	protein_coding	importin 7 && sp|Q9EPL8|IPO7_MOUSE Importin-7 OS=Mus musculus OX=10090 GN=Ipo7 PE=1 SV=2 && PF03810:Importin-beta N-terminal domain|PF08506:Cse1	-
103393040	559.24	587.302	531.191	2408.33	1453.89	1430.06	559.244	1764.1	-1.65748	1.74e-08	1.02e-06	LOC103393040	NC_024323.1	7746961	7766571	+	3478	protein_coding	platelet-derived growth factor subunit A-like%2C transcript variant X1 && sp|P28576|PDGFA_RAT Platelet-derived growth factor subunit A OS=Rattus norvegicus OX=10116 GN=Pdgfa PE=2 SV=2 && -	-
103391646	3016.21	2580.69	5130.51	412.857	1032.94	517.47	3575.8	654.422	2.45035	1.74e-08	1.02e-06	hspd1	NC_024322.1	2540000	2544808	-	2068	protein_coding	heat shock protein family D (Hsp60) member 1 && sp|P18687|CH60_CRIGR 60 kDa heat shock protein, mitochondrial OS=Cricetulus griseus OX=10029 GN=HSPD1 PE=2 SV=1 && PF00118:TCP-1/cpn60 chaperonin family	-
103379238	1041.34	339.644	423.278	45.873	117.821	44.1253	601.422	69.2733	3.12088	1.75e-08	1.02e-06	tp53i3	NC_024307.1	11212653	11215585	+	1359	protein_coding	tumor protein p53 inducible protein 3 && sp|Q53FA7|QORX_HUMAN Quinone oxidoreductase PIG3 OS=Homo sapiens OX=9606 GN=TP53I3 PE=1 SV=2 && PF00107:Zinc-binding dehydrogenase|PF08240:Alcohol dehydrogenase GroES-like domain	-
103387481	1804.82	1709.34	1891.26	769.416	908.255	837.379	1801.81	838.35	1.10404	1.77e-08	1.04e-06	ide	NC_024318.1	11306063	11330356	-	5989	protein_coding	insulin degrading enzyme%2C transcript variant X3 && sp|Q24K02|IDE_BOVIN Insulin-degrading enzyme OS=Bos taurus OX=9913 GN=IDE PE=2 SV=1 && PF05193:Peptidase M16 inactive domain|PF16187:Middle or third domain of peptidase_M16|PF00675:Insulinase (Peptidase family M16)	-
103377056	818.699	816.764	722.829	2145.61	1875.99	1603.56	786.097	1875.05	-1.25412	1.9e-08	1.11e-06	wwp1	NC_024309.1	6960107	6978671	-	5452	protein_coding	WW domain containing E3 ubiquitin protein ligase 1%2C transcript variant X2 && sp|Q9H0M0|WWP1_HUMAN NEDD4-like E3 ubiquitin-protein ligase WWP1 OS=Homo sapiens OX=9606 GN=WWP1 PE=1 SV=1 && PF00168:C2 domain|PF00397:WW domain|PF00632:HECT-domain (ubiquitin-transferase)	-
103399889	26.2965	29.3145	33.4902	162.641	90.3679	171.487	29.7004	141.499	-2.25436	1.91e-08	1.11e-06	LOC103399889	NC_024308.1	14063571	14073796	-	3585	lncRNA	uncharacterized LOC103399889%2C transcript variant X1 && sp|P19174|PLCG1_HUMAN 1-phosphatidylinositol 4,5-bisphosphate phosphodiesterase gamma-1 OS=Homo sapiens OX=9606 GN=PLCG1 PE=1 SV=1 && -	-
103392179	161.285	160.725	195.359	614.073	472.43	416.182	172.456	500.895	-1.53816	1.92e-08	1.11e-06	wdsub1	NC_024322.1	12117797	12131497	+	2060	protein_coding	WD repeat%2C sterile alpha motif and U-box domain containing 1 && sp|A0AUS0|WSDU1_DANRE WD repeat, SAM and U-box domain-containing protein 1 OS=Danio rerio OX=7955 GN=wdsub1 PE=2 SV=1 && PF04564:U-box domain|PF00400:WD domain, G-beta repeat|PF07647:SAM domain (Sterile alpha motif)	-
103380466	781.884	502.391	504.213	1841.18	1715.85	2823.02	596.162	2126.68	-1.83462	1.97e-08	1.14e-06	LOC103380466	NC_024312.1	16530467	16538037	-	2228	protein_coding	very long-chain acyl-CoA synthetase-like && sp|O14975|S27A2_HUMAN Very long-chain acyl-CoA synthetase OS=Homo sapiens OX=9606 GN=SLC27A2 PE=1 SV=2 && PF00501:AMP-binding enzyme	-
103387576	151.643	517.553	71.6317	3188.17	3383.65	1841.23	246.943	2804.35	-3.50615	2.05e-08	1.18e-06	oit3	NC_024318.1	12764447	12776564	+	3590	protein_coding	oncoprotein induced transcript 3%2C transcript variant X2 && sp|Q8WWZ8|OIT3_HUMAN Oncoprotein-induced transcript 3 protein OS=Homo sapiens OX=9606 GN=OIT3 PE=1 SV=2 && PF00100:Zona pellucida-like domain|PF14670:Coagulation Factor Xa inhibitory site	-
103380274	4831.55	6643.28	5230.05	14128.9	12645.8	13086.2	5568.29	13286.9	-1.25476	2.06e-08	1.18e-06	eps8l2	NC_024312.1	12962514	12981016	+	4464	protein_coding	EPS8 like 2%2C transcript variant X3 && sp|Q99K30|ES8L2_MOUSE Epidermal growth factor receptor kinase substrate 8-like protein 2 OS=Mus musculus OX=10090 GN=Eps8l2 PE=1 SV=1 && PF18016:SAM domain (Sterile alpha motif)|PF00018:SH3 domain|PF08416:Phosphotyrosine-binding domain	-
103389571	113.075	64.6942	173.963	20.8514	8.00728	10.0285	117.244	12.9624	3.17386	2.2e-08	1.26e-06	bub1b	NC_024307.1	4357937	4361115	-	1886	protein_coding	BUB1 mitotic checkpoint serine/threonine kinase B && sp|O60566|BUB1B_HUMAN Mitotic checkpoint serine/threonine-protein kinase BUB1 beta OS=Homo sapiens OX=9606 GN=BUB1B PE=1 SV=3 && PF08311:Mad3/BUB1 homology region 1	-
103395154	678.451	7501.49	1080.06	26.0642	65.2022	13.037	3086.67	34.7678	6.47371	2.22e-08	1.27e-06	LOC103395154	NC_024325.1	8218720	8226301	+	2791	protein_coding	complement factor B-like && sp|P04186|CFAB_MOUSE Complement factor B OS=Mus musculus OX=10090 GN=Cfb PE=1 SV=2 && PF00092:von Willebrand factor type A domain|PF00084:Sushi repeat (SCR repeat)|PF00089:Trypsin	-
103379316	25.42	70.7593	7.44226	761.075	277.967	414.177	34.5405	484.406	-3.81392	2.29e-08	1.3e-06	LOC103379316	NC_024311.1	16980790	16984298	+	2469	protein_coding	cytochrome P450 1A1 && sp|Q92100|CP1A1_PLEPL Cytochrome P450 1A1 OS=Pleuronectes platessa OX=8262 GN=cyp1a1 PE=2 SV=1 && PF00067:Cytochrome P450	-
103380266	153.396	92.9979	286.527	7.29798	14.8707	29.0826	177.64	17.0838	3.37464	2.33e-08	1.32e-06	kif23	NC_024312.1	12881359	12889686	-	3313	protein_coding	kinesin family member 23%2C transcript variant X1 && sp|Q02241|KIF23_HUMAN Kinesin-like protein KIF23 OS=Homo sapiens OX=9606 GN=KIF23 PE=1 SV=3 && PF00225:Kinesin motor domain|PF16540:Arf6-interacting domain of mitotic kinesin-like protein 1	-
103396727	525.054	640.877	720.039	6014.58	3325.31	1640.66	628.656	3660.18	-2.54161	2.35e-08	1.33e-06	smim24	NC_024308.1	8252372	8253842	-	613	protein_coding	small integral membrane protein 24%2C transcript variant X1 && - && PF15807:Membrane-associated protein 117 kDa, PDZK1-interacting protein 1	-
103391375	942.292	469.033	660.5	1995.48	2812.84	2660.56	690.609	2489.63	-1.84957	2.38e-08	1.34e-06	LOC103391375	NC_024321.1	18654533	18662258	-	2765	protein_coding	cysteine-rich and transmembrane domain-containing protein 1-like%2C transcript variant X2 && sp|Q28H62|CYTM1_XENTR Cysteine-rich and transmembrane domain-containing protein 1 OS=Xenopus tropicalis OX=8364 GN=cystm1 PE=3 SV=1 && -	-
103377511	320.818	224.408	179.545	853.864	1087.85	677.926	241.59	873.212	-1.85296	2.44e-08	1.37e-06	LOC103377511	NC_024309.1	15916936	15920732	-	1468	lncRNA	uncharacterized LOC103377511 && sp|P50591|TNF10_HUMAN Tumor necrosis factor ligand superfamily member 10 OS=Homo sapiens OX=9606 GN=TNFSF10 PE=1 SV=1 && -	-
103393319	80.6427	78.846	72.562	207.471	331.73	232.661	77.3503	257.287	-1.7329	2.49e-08	1.39e-06	pmm1	NC_024323.1	12361806	12368365	-	2109	protein_coding	phosphomannomutase 1 && sp|O35621|PMM1_MOUSE Phosphomannomutase 1 OS=Mus musculus OX=10090 GN=Pmm1 PE=1 SV=1 && PF03332:Eukaryotic phosphomannomutase	-
103394818	205.113	153.649	32.5599	2165.41	5252.78	487.384	130.441	2635.19	-4.33625	2.5e-08	1.39e-06	dgat2	NC_024325.1	1990785	1999168	+	2986	protein_coding	diacylglycerol O-acyltransferase 2 && sp|Q4V9F0|DGAT2_DANRE Diacylglycerol O-acyltransferase 2 OS=Danio rerio OX=7955 GN=dgat2 PE=2 SV=1 && PF03982:Diacylglycerol acyltransferase	-
103388163	1275.38	1599.16	1643.81	3350.82	3921.28	3337.48	1506.12	3536.53	-1.23157	2.55e-08	1.42e-06	LOC103388163	NC_024319.1	4006502	4025972	-	2854	protein_coding	tyrosine-protein phosphatase non-receptor type 3 && sp|P26045|PTN3_HUMAN Tyrosine-protein phosphatase non-receptor type 3 OS=Homo sapiens OX=9606 GN=PTPN3 PE=1 SV=2 && PF00102:Protein-tyrosine phosphatase|PF00595:PDZ domain|PF09380:FERM C-terminal PH-like domain|PF09379:FERM N-terminal domain|PF00373:FERM central domain	-
103389597	1109.71	625.714	217.686	54.2136	72.0655	102.291	651.038	76.1899	3.09468	2.81e-08	1.56e-06	LOC103389597	NC_024320.1	11400883	11427401	-	533	protein_coding	V-set pre-B cell surrogate light chain 3 && sp|P01683|KV02_RABIT Ig kappa chain V region 3315 OS=Oryctolagus cuniculus OX=9986 PE=1 SV=1 && PF07686:Immunoglobulin V-set domain	-
103378652	185.829	143.54	528.4	18.7662	24.0218	46.131	285.923	29.6397	3.26766	2.82e-08	1.56e-06	diaph3	NC_024311.1	2867760	3043500	+	6352	protein_coding	diaphanous related formin 3%2C transcript variant X1 && sp|Q9NSV4|DIAP3_HUMAN Protein diaphanous homolog 3 OS=Homo sapiens OX=9606 GN=DIAPH3 PE=1 SV=4 && PF06367:Diaphanous FH3 Domain|PF06371:Diaphanous GTPase-binding Domain|PF06345:DRF Autoregulatory Domain|PF02181:Formin Homology 2 Domain	-
103381927	60.482	134.443	53.0261	460.815	356.896	391.111	82.6502	402.941	-2.28855	2.95e-08	1.63e-06	cdhr1	NC_024314.1	9241928	9259158	+	5275	protein_coding	cadherin related family member 1%2C transcript variant X1 && sp|Q6B3P0|CDHR1_DANRE Cadherin-related family member 1 OS=Danio rerio OX=7955 GN=cdhr1 PE=2 SV=1 && PF00028:Cadherin domain	-
103393044	196.347	206.213	177.684	466.028	449.552	429.219	193.415	448.266	-1.2129	3.21e-08	1.76e-06	LOC103393044	NC_024323.1	7985334	7990111	-	2575	protein_coding	cytochrome b-c1 complex subunit 2%2C mitochondrial-like && sp|Q9DB77|QCR2_MOUSE Cytochrome b-c1 complex subunit 2, mitochondrial OS=Mus musculus OX=10090 GN=Uqcrc2 PE=1 SV=1 && PF00675:Insulinase (Peptidase family M16)|PF05193:Peptidase M16 inactive domain	-
103397603	246.311	484.195	155.357	2309.29	1846.25	1122.19	295.288	1759.24	-2.57535	3.39e-08	1.86e-06	LOC103397603	NC_024328.1	7944772	7948587	-	2051	pseudogene	- && sp|P36514|UD2C1_RABIT UDP-glucuronosyltransferase 2C1 (Fragment) OS=Oryctolagus cuniculus OX=9986 GN=UGT2C1 PE=2 SV=1 && PF00201:UDP-glucoronosyl and UDP-glucosyl transferase	-
103394774	1350.77	1254.46	2121.04	389.921	567.373	471.339	1575.42	476.211	1.72638	3.4e-08	1.86e-06	LOC103394774	NC_024325.1	540090	544448	-	1578	protein_coding	nucleophosmin-like && sp|P16039|NPM_CHICK Nucleophosmin OS=Gallus gallus OX=9031 GN=NPM1 PE=2 SV=1 && PF03066:Nucleoplasmin/nucleophosmin domain|PF16276:Nucleophosmin C-terminal domain	-
103379919	149.89	153.649	747.947	10.4257	22.8779	37.1054	350.495	23.4697	3.89919	3.42e-08	1.86e-06	LOC103379919	NC_024312.1	6826137	6836074	+	4518	protein_coding	anillin-like%2C transcript variant X1 && sp|Q9NQW6|ANLN_HUMAN Anillin OS=Homo sapiens OX=9606 GN=ANLN PE=1 SV=2 && PF08174:Cell division protein anillin|PF00169:PH domain	-
103383352	848.502	1131.14	539.564	154.3	224.204	247.704	839.734	208.736	2.00809	3.6e-08	1.95e-06	ednra	NC_024315.1	2789505	2799744	+	3219	protein_coding	endothelin receptor type A%2C transcript variant X1 && sp|P25101|EDNRA_HUMAN Endothelin-1 receptor OS=Homo sapiens OX=9606 GN=EDNRA PE=1 SV=1 && PF00001:7 transmembrane receptor (rhodopsin family)	-
103394288	120.088	137.475	117.216	316.941	639.439	1025.91	124.926	660.765	-2.40348	3.67e-08	1.98e-06	cfap20	NC_024324.1	8985727	8987665	+	1262	protein_coding	cilia and flagella associated protein 20%2C transcript variant X3 && sp|Q6PBJ2|CFA20_DANRE Cilia- and flagella-associated protein 20 OS=Danio rerio OX=7955 GN=cfap20 PE=2 SV=1 && PF05018:Protein of unknown function (DUF667)	-
103384127	154.273	145.562	161.869	347.175	510.178	414.177	153.901	423.843	-1.46076	3.74e-08	2.02e-06	LOC103384127	NC_024307.1	20026539	20028536	+	461	lncRNA	uncharacterized LOC103384127 && - && -	-
103386906	4493.2	6513.89	4603.04	14534.4	13943	12068.3	5203.38	13515.2	-1.37712	3.99e-08	2.14e-06	LOC103386906	NC_024318.1	905707	908261	-	1332	protein_coding	uncharacterized LOC103386906%2C transcript variant X1 && - && PF00086:Thyroglobulin type-1 repeat|PF09307:CLIP, MHC2 interacting	-
112487100	1200	1140.23	844.696	3269.5	2422.77	2771.87	1061.64	2821.38	-1.41014	4.15e-08	2.23e-06	LOC112487100	NC_024307.1	16314844	16318618	-	1259	protein_coding	uncharacterized LOC112487100 && - && PF00169:PH domain	-
103385934	96.4206	97.0413	59.5381	1051.95	268.816	458.302	84.3333	593.023	-2.81424	4.22e-08	2.25e-06	LOC103385934	NC_024317.1	3713531	3714735	-	880	protein_coding	musculoskeletal embryonic nuclear protein 1 && sp|Q8IVN3|MSTN1_HUMAN Musculoskeletal embryonic nuclear protein 1 OS=Homo sapiens OX=9606 GN=MUSTN1 PE=3 SV=2 && -	-
103376886	127.976	91.987	319.087	19.8088	25.1657	24.0684	179.683	23.0143	2.96586	4.3e-08	2.29e-06	mis18bp1	NC_024307.1	7061230	7068371	+	3707	protein_coding	MIS18 binding protein 1%2C transcript variant X1 && sp|Q6P0N0|M18BP_HUMAN Mis18-binding protein 1 OS=Homo sapiens OX=9606 GN=MIS18BP1 PE=1 SV=1 && PF09133:SANTA (SANT Associated)	-
103377013	180.57	200.148	213.035	511.901	615.417	436.239	197.917	521.186	-1.39668	4.4e-08	2.34e-06	LOC103377013	NC_024309.1	5517322	5529618	+	2149	protein_coding	uncharacterized LOC103377013 && sp|Q7T3E6|BMI1B_DANRE Polycomb complex protein BMI-1-B OS=Danio rerio OX=7955 GN=bmi1b PE=2 SV=1 && PF07258:COMM domain|PF13923:Zinc finger, C3HC4 type (RING finger)	-
103376758	2579.69	7814.85	1730.33	29630.8	31824.4	25793.3	4041.62	29082.8	-2.84722	4.46e-08	2.37e-06	gpx4	NC_024308.1	18354132	18356613	+	971	protein_coding	glutathione peroxidase 4 && sp|P36969|GPX4_HUMAN Phospholipid hydroperoxide glutathione peroxidase OS=Homo sapiens OX=9606 GN=GPX4 PE=1 SV=3 && PF00255:Glutathione peroxidase	-
103391659	683.71	452.859	463.281	110.512	183.024	81.2307	533.283	124.922	2.09626	4.54e-08	2.39e-06	dnajb11	NC_024322.1	2766252	2771569	-	1975	protein_coding	DnaJ heat shock protein family (Hsp40) member B11 && sp|Q9UBS4|DJB11_HUMAN DnaJ homolog subfamily B member 11 OS=Homo sapiens OX=9606 GN=DNAJB11 PE=1 SV=1 && PF00226:DnaJ domain|PF01556:DnaJ C terminal domain	-
103398546	786.266	1268.61	1092.15	396.176	361.472	378.074	1049.01	378.574	1.47	4.55e-08	2.39e-06	LOC103398546	NW_007585114.1	286505	291091	+	2669	protein_coding	uncharacterized LOC103398546%2C transcript variant X1 && - && -	-
103377371	383.929	94.0087	103.261	22.9365	12.5829	18.0513	193.733	17.8569	3.43784	4.65e-08	2.44e-06	LOC103377371	NC_024309.1	12397335	12400968	+	1717	protein_coding	inositol monophosphatase 1-like && sp|P29218|IMPA1_HUMAN Inositol monophosphatase 1 OS=Homo sapiens OX=9606 GN=IMPA1 PE=1 SV=1 && PF00459:Inositol monophosphatase family	-
103390237	156.026	52.564	138.612	12.5108	14.8707	18.0513	115.734	15.1443	2.93416	5.04e-08	2.64e-06	LOC103390237	NC_024320.1	24529392	24534079	-	2347	protein_coding	ADP-ribosylation factor-like protein 3%2C transcript variant X1 && sp|P36405|ARL3_HUMAN ADP-ribosylation factor-like protein 3 OS=Homo sapiens OX=9606 GN=ARL3 PE=1 SV=2 && PF00025:ADP-ribosylation factor family	-
103392960	8392.1	3575.36	1881.96	534.838	351.177	850.416	4616.48	578.81	2.99543	5.08e-08	2.65e-06	LOC103392960	NC_024323.1	7427596	7453403	-	4731	protein_coding	uncharacterized LOC103392960%2C transcript variant X3 && sp|P0DOX5|IGG1_HUMAN Immunoglobulin gamma-1 heavy chain OS=Homo sapiens OX=9606 PE=1 SV=2 && PF07686:Immunoglobulin V-set domain|PF07654:Immunoglobulin C1-set domain	-
103380288	5314.53	3576.37	4561.17	825.714	1730.72	1017.89	4484.03	1191.44	1.91235	5.11e-08	2.66e-06	hsp90b1	NC_024312.1	13264078	13269579	-	2771	protein_coding	heat shock protein 90 beta family member 1 && sp|Q66HD0|ENPL_RAT Endoplasmin OS=Rattus norvegicus OX=10116 GN=Hsp90b1 PE=1 SV=2 && PF02518:Histidine kinase-, DNA gyrase B-, and HSP90-like ATPase|PF00183:Hsp90 protein	-
103382237	285.756	258.777	142.333	1143.7	899.103	673.914	228.955	905.572	-1.98365	5.15e-08	2.68e-06	LOC103382237	NC_024314.1	14534666	14544478	+	3198	protein_coding	hepatic leukemia factor-like%2C transcript variant X1 && sp|Q16534|HLF_HUMAN Hepatic leukemia factor OS=Homo sapiens OX=9606 GN=HLF PE=1 SV=1 && PF07716:Basic region leucine zipper	TF_bZIP
103396596	2113.36	2256.21	2839.22	686.01	937.996	1017.89	2402.93	880.633	1.44818	5.6e-08	2.9e-06	dhrs1	NC_024326.1	11831787	11835661	-	2245	protein_coding	dehydrogenase/reductase 1%2C transcript variant X2 && sp|Q96LJ7|DHRS1_HUMAN Dehydrogenase/reductase SDR family member 1 OS=Homo sapiens OX=9606 GN=DHRS1 PE=1 SV=1 && PF00106:short chain dehydrogenase	-
103395507	155.15	158.703	538.634	28.1494	4.57559	29.0826	284.162	20.6025	3.77999	5.64e-08	2.91e-06	hunk	NC_024325.1	14628036	14638980	+	5035	protein_coding	hormonally up-regulated Neu-associated kinase && sp|Q5XHI9|HUNKA_XENLA Hormonally up-regulated neu tumor-associated kinase homolog A OS=Xenopus laevis OX=8355 GN=hunk-a PE=2 SV=1 && -	-
103387552	72.7537	31.3362	97.6797	3.12771	8.00728	4.0114	67.2565	5.04879	3.75147	5.73e-08	2.95e-06	mad2l1bp	NC_024318.1	12341777	12343939	+	1713	protein_coding	MAD2L1 binding protein%2C transcript variant X1 && sp|Q15013|MD2BP_HUMAN MAD2L1-binding protein OS=Homo sapiens OX=9606 GN=MAD2L1BP PE=1 SV=1 && PF06581:Mad1 and Cdc20-bound-Mad2 binding	-
103389690	2398.24	572.139	920.98	194.96	219.628	156.444	1297.12	190.344	2.76911	5.9e-08	3.03e-06	LOC103389690	NC_024320.1	12864363	12869679	+	2099	protein_coding	cytochrome b-245 heavy chain && sp|P04839|CY24B_HUMAN Cytochrome b-245 heavy chain OS=Homo sapiens OX=9606 GN=CYBB PE=1 SV=2 && PF08022:FAD-binding domain|PF01794:Ferric reductase like transmembrane component|PF08030:Ferric reductase NAD binding domain	-
103388520	1393.72	191.05	558.169	75.0649	66.3461	77.2194	714.312	72.8768	3.29303	5.93e-08	3.04e-06	LOC103388520	NC_024319.1	10441600	10444265	+	1550	protein_coding	urokinase plasminogen activator surface receptor && - && -	-
103383361	482.98	475.098	782.367	2731.53	1648.36	1789.08	580.148	2056.32	-1.82556	6.11e-08	3.12e-06	LOC103383361	NC_024315.1	3001571	3008320	-	2963	protein_coding	two pore calcium channel protein 1-like%2C transcript variant X1 && sp|Q9ULQ1|TPC1_HUMAN Two pore calcium channel protein 1 OS=Homo sapiens OX=9606 GN=TPCN1 PE=1 SV=3 && PF00520:Ion transport protein	-
103377105	1260.48	316.395	230.71	74.0224	26.3096	54.1538	602.529	51.4953	3.54727	6.27e-08	3.19e-06	arhgap12	NC_024309.1	8423139	8466972	+	4395	protein_coding	Rho GTPase activating protein 12%2C transcript variant X1 && sp|Q8IWW6|RHG12_HUMAN Rho GTPase-activating protein 12 OS=Homo sapiens OX=9606 GN=ARHGAP12 PE=1 SV=1 && PF14604:Variant SH3 domain|PF16618:Linker region between SH3 and WW domains on ARHGAP12|PF00620:RhoGAP domain|PF00169:PH domain	-
103384565	3513.22	3152.83	3345.3	1362.64	1734.15	1526.34	3337.11	1541.04	1.11486	6.31e-08	3.2e-06	pim1	NC_024316.1	2652710	2657308	+	3120	protein_coding	Pim-1 proto-oncogene%2C serine/threonine kinase && sp|Q95LJ0|PIM1_FELCA Serine/threonine-protein kinase pim-1 OS=Felis catus OX=9685 GN=PIM1 PE=2 SV=1 && PF00069:Protein kinase domain	-
103390002	3836.66	4383.03	4302.56	8541.76	11673.5	9067.76	4174.08	9761	-1.22557	6.65e-08	3.36e-06	nsa2	NC_024320.1	18905473	18908078	+	1132	protein_coding	NSA2%2C ribosome biogenesis homolog && sp|Q9CR47|NSA2_MOUSE Ribosome biogenesis protein NSA2 homolog OS=Mus musculus OX=10090 GN=Nsa2 PE=2 SV=1 && PF01201:Ribosomal protein S8e	-
103388119	821.328	238.56	402.812	53.171	104.095	65.1852	487.567	74.1503	2.71908	6.66e-08	3.36e-06	LOC103388119	NC_024319.1	3379056	3384106	-	3384	protein_coding	free fatty acid receptor 2-like%2C transcript variant X1 && sp|Q3UFD7|FFAR3_MOUSE Free fatty acid receptor 3 OS=Mus musculus OX=10090 GN=Ffar3 PE=1 SV=1 && PF00001:7 transmembrane receptor (rhodopsin family)	-
103377354	461.942	494.304	381.416	1110.34	980.32	987.806	445.887	1026.15	-1.20274	6.85e-08	3.45e-06	zfyve28	NC_024307.1	6654125	6678180	+	4959	protein_coding	zinc finger FYVE-type containing 28 && sp|A0JMD2|LST2_DANRE Lateral signaling target protein 2 homolog OS=Danio rerio OX=7955 GN=zfyve28 PE=2 SV=1 && PF01363:FYVE zinc finger	-
103383577	4639.59	4787.37	6053.35	2216.5	2420.49	2304.55	5160.1	2313.84	1.15714	7.09e-08	3.56e-06	LOC103383577	NC_024315.1	6101974	6112741	+	3487	protein_coding	uncharacterized LOC103383577%2C transcript variant X2 && - && -	-
103391176	533.82	1051.28	282.806	1.04257	10.2951	0	622.635	3.77922	7.38259	7.14e-08	3.57e-06	LOC103391176	NC_024321.1	15078877	15081639	+	1694	protein_coding	cis-aconitate decarboxylase-like && sp|P54987|IRG1_MOUSE Cis-aconitate decarboxylase OS=Mus musculus OX=10090 GN=Acod1 PE=1 SV=2 && PF03972:MmgE/PrpD family	-
103380551	171.804	140.508	258.619	23.9791	48.0437	46.131	190.31	39.3846	2.27431	7.18e-08	3.58e-06	LOC103380551	NC_024312.1	18514847	18522132	+	2680	protein_coding	neuroepithelial cell-transforming gene 1 protein-like && sp|Q9Z206|ARHG8_MOUSE Neuroepithelial cell-transforming gene 1 protein OS=Mus musculus OX=10090 GN=Net1 PE=1 SV=2 && PF00621:RhoGEF domain	-
103389631	1877.57	1399.01	1887.54	716.245	766.411	627.783	1721.38	703.48	1.29133	7.24e-08	3.6e-06	LOC103389631	NC_024320.1	12461214	12464312	+	804	protein_coding	cytochrome c oxidase subunit 5B%2C mitochondrial && sp|Q5S3G4|COX5B_PIG Cytochrome c oxidase subunit 5B, mitochondrial OS=Sus scrofa OX=9823 GN=COX5B PE=2 SV=1 && PF01215:Cytochrome c oxidase subunit Vb	-
103391142	349.744	274.95	1024.24	65.6818	100.663	51.1453	549.645	72.4967	2.92415	7.26e-08	3.6e-06	LOC103391142	NC_024321.1	14337718	14348175	-	4300	protein_coding	FH2 domain-containing protein 1-like%2C transcript variant X3 && sp|Q3ULZ2|FHDC1_MOUSE FH2 domain-containing protein 1 OS=Mus musculus OX=10090 GN=Fhdc1 PE=1 SV=3 && PF02181:Formin Homology 2 Domain	-
103396639	863.403	664.126	842.836	245.004	355.752	250.712	790.122	283.823	1.47821	7.33e-08	3.63e-06	pitrm1	NC_024326.1	12194708	12203165	+	3305	protein_coding	pitrilysin metallopeptidase 1 && sp|Q7ZVZ6|PREP_DANRE Presequence protease, mitochondrial OS=Danio rerio OX=7955 GN=pitrm1 PE=2 SV=1 && PF00675:Insulinase (Peptidase family M16)|PF08367:Peptidase M16C associated|PF05193:Peptidase M16 inactive domain	-
103377638	929.144	896.621	1016.8	394.091	475.861	431.225	947.521	433.726	1.12777	8.07e-08	3.99e-06	LOC103377638	NC_024310.1	1682983	1705372	+	6147	protein_coding	clathrin heavy chain 1-like && sp|Q68FD5|CLH1_MOUSE Clathrin heavy chain 1 OS=Mus musculus OX=10090 GN=Cltc PE=1 SV=3 && PF13838:Clathrin-H-link|PF09268:Clathrin, heavy-chain linker|PF00637:Region in Clathrin and VPS|PF01394:Clathrin propeller repeat	-
103387320	821.328	899.653	1279.14	366.984	385.493	358.017	1000.04	370.165	1.43394	8.2e-08	4.04e-06	LOC103387320	NC_024318.1	8648460	8654624	+	1845	protein_coding	eukaryotic translation initiation factor 4E-like && sp|P06730|IF4E_HUMAN Eukaryotic translation initiation factor 4E OS=Homo sapiens OX=9606 GN=EIF4E PE=1 SV=2 && PF01652:Eukaryotic initiation factor 4E	-
103395037	132.359	121.302	89.3071	350.303	356.896	283.806	114.323	330.335	-1.53021	8.27e-08	4.06e-06	LOC103395037	NC_024325.1	6418317	6426121	+	5039	protein_coding	CLOCK-interacting pacemaker-like && - && PF15800:Clock interacting protein circadian	-
103386344	261.212	110.182	283.736	6.25541	30.8852	32.0912	218.377	23.0773	3.24406	8.55e-08	4.19e-06	mybl2	NC_024317.1	11260848	11267875	-	3004	protein_coding	MYB proto-oncogene like 2 && sp|Q03237|MYBB_CHICK Myb-related protein B OS=Gallus gallus OX=9031 GN=MYBL2 PE=1 SV=1 && PF09316:C-myb, C-terminal|PF00249:Myb-like DNA-binding domain|PF13921:Myb-like DNA-binding domain	MYB
112487399	99.9268	139.497	96.7494	287.749	326.011	402.142	112.058	338.634	-1.59738	8.66e-08	4.23e-06	LOC112487399	NC_024314.1	7015957	7027769	+	1410	protein_coding	acyl-CoA synthetase family member 2%2C mitochondrial-like && sp|Q0P4F7|ACSF2_DANRE Medium-chain acyl-CoA ligase ACSF2, mitochondrial OS=Danio rerio OX=7955 GN=acsf2 PE=2 SV=1 && PF13193:AMP-binding enzyme C-terminal domain|PF00501:AMP-binding enzyme	-
103385071	243.681	54.5857	46.5141	3.12771	10.2951	4.0114	114.927	5.81139	4.32024	8.74e-08	4.26e-06	dhh	NC_024316.1	12745822	12751387	+	2941	protein_coding	desert hedgehog%2C transcript variant X1 && sp|Q62226|SHH_MOUSE Sonic hedgehog protein OS=Mus musculus OX=10090 GN=Shh PE=1 SV=2 && PF01079:Hint module|PF01085:Hedgehog amino-terminal signalling domain	-
103392216	3769.17	3332.76	7615.29	1002.95	1396.7	1241.53	4905.74	1213.73	2.0151	8.9e-08	4.31e-06	LOC103392216	NC_024322.1	13402019	13405091	+	1626	protein_coding	tubulin alpha chain && sp|P30436|TBA_ONCKE Tubulin alpha chain OS=Oncorhynchus keta OX=8018 PE=2 SV=2 && PF03953:Tubulin C-terminal domain|PF00091:Tubulin/FtsZ family, GTPase domain	-
103386316	295.398	227.44	693.991	64.6393	86.9362	54.1538	405.61	68.5764	2.5659	8.9e-08	4.31e-06	LOC103386316	NC_024317.1	11680351	11686310	+	2339	protein_coding	protein FAM83D%2C transcript variant X1 && sp|A4QP72|FA83D_DANRE Protein FAM83D OS=Danio rerio OX=7955 GN=fam83d PE=2 SV=1 && PF07894:FAM83 A-H	-
103384729	263.842	240.581	328.39	108.427	100.663	90.2564	277.604	99.7822	1.47683	9.14e-08	4.42e-06	mrpl49	NC_024316.1	5137650	5139076	-	1427	protein_coding	mitochondrial ribosomal protein L49 && sp|Q4R5K7|RM49_MACFA 39S ribosomal protein L49, mitochondrial OS=Macaca fascicularis OX=9541 GN=MRPL49 PE=2 SV=1 && PF05046:Mitochondrial large subunit ribosomal protein (Img2)	-
103393221	351.497	392.208	280.945	1060.29	943.715	749.128	341.55	917.712	-1.42612	9.24e-08	4.45e-06	LOC103393221	NC_024323.1	10540799	10544486	-	1704	protein_coding	protein yippee-like 3 && sp|Q65Z54|YPEL3_ORYLA Protein yippee-like 3 OS=Oryzias latipes OX=8090 GN=ypel3 PE=3 SV=1 && PF03226:Yippee zinc-binding/DNA-binding /Mis18, centromere assembly	-
103386407	1610.22	2079.31	995.402	6842.38	10140.7	4294.2	1561.65	7092.41	-2.18324	9.83e-08	4.72e-06	shmt2	NC_024317.1	12906493	12933777	+	3708	protein_coding	serine hydroxymethyltransferase 2%2C transcript variant X2 && sp|P34897|GLYM_HUMAN Serine hydroxymethyltransferase, mitochondrial OS=Homo sapiens OX=9606 GN=SHMT2 PE=1 SV=3 && PF00464:Serine hydroxymethyltransferase	-
103379295	145.507	46.4989	90.2374	4.17027	13.7268	10.0285	94.0813	9.30851	3.34563	9.98e-08	4.78e-06	cenpo	NC_024307.1	11208664	11211010	+	1098	protein_coding	centromere protein O && sp|Q9BU64|CENPO_HUMAN Centromere protein O OS=Homo sapiens OX=9606 GN=CENPO PE=1 SV=1 && -	-
103390967	7.01241	7.07593	5.58169	40.6602	44.612	69.1966	6.55668	51.4896	-2.97538	1.02e-07	4.88e-06	LOC103390967	NC_024307.1	4143415	4148980	+	1482	protein_coding	syncoilin-like && sp|Q9EPM5|SYNCI_MOUSE Syncoilin OS=Mus musculus OX=10090 GN=Sync PE=1 SV=1 && -	-
103377344	169.174	101.085	278.154	14.596	12.5829	39.1111	182.804	22.0966	3.04255	1.03e-07	4.92e-06	kif15	NC_024307.1	6718646	6729156	+	4969	protein_coding	kinesin family member 15 && sp|Q91785|KI15A_XENLA Kinesin-like protein KIF15-A OS=Xenopus laevis OX=8355 GN=kif15-a PE=1 SV=1 && PF15908:Hyaluronan mediated motility receptor C-terminal|PF00225:Kinesin motor domain	-
103391411	184.952	151.627	383.276	40.6602	21.7341	52.1481	239.952	38.1808	2.64822	1.04e-07	4.96e-06	LOC103391411	NC_024321.1	19378224	19384183	+	2670	protein_coding	centrosome-associated protein CEP250 && sp|O75330|HMMR_HUMAN Hyaluronan mediated motility receptor OS=Homo sapiens OX=9606 GN=HMMR PE=1 SV=2 && PF15905:Hyaluronan mediated motility receptor N-terminal	-
103397873	40.3214	219.354	265.13	19.8088	12.5829	9.02564	174.935	13.8058	3.66339	1.05e-07	4.98e-06	LOC103397873	NC_024328.1	10356354	10361351	+	2024	lncRNA	uncharacterized LOC103397873 && - && -	-
103379746	6775.74	4769.17	5315.63	2293.65	2259.2	2570.3	5620.18	2374.38	1.24307	1.08e-07	5.1e-06	cotl1	NC_024312.1	4854924	4860339	+	2372	protein_coding	coactosin like F-actin binding protein 1 && sp|Q2HJ57|COTL1_BOVIN Coactosin-like protein OS=Bos taurus OX=9913 GN=COTL1 PE=2 SV=3 && PF00241:Cofilin/tropomyosin-type actin-binding protein	-
103399596	6.13586	19.2061	5.58169	163.683	57.1949	97.2763	10.3079	106.051	-3.37659	1.11e-07	5.22e-06	LOC103399596	NW_007590868.1	7	421	+	313	protein_coding	cytochrome P450 2J5 && sp|O54749|CP2J5_MOUSE Cytochrome P450 2J5 OS=Mus musculus OX=10090 GN=Cyp2j5 PE=1 SV=1 && PF00067:Cytochrome P450	-
103378944	1252.59	1225.15	721.899	3854.38	3605.56	2678.61	1066.55	3379.52	-1.66386	1.11e-07	5.22e-06	fhod1	NC_024311.1	7998648	8017923	-	4673	protein_coding	formin homology 2 domain containing 1%2C transcript variant X1 && sp|Q2V2M9|FHOD3_HUMAN FH1/FH2 domain-containing protein 3 OS=Homo sapiens OX=9606 GN=FHOD3 PE=1 SV=2 && PF18382:Formin N-terminal GTPase-binding domain|PF02181:Formin Homology 2 Domain	-
novel.63	181.446	169.822	111.634	722.5	583.388	385.094	154.301	563.661	-1.86888	1.12e-07	5.26e-06	-	NC_024308.1	1811702	1814083	+	2287	-	- && - && -	-
103396401	57.8524	256.755	21.3965	2.08514	5.71949	1.00285	112.001	2.93582	5.27526	1.12e-07	5.26e-06	cp	NC_024308.1	7975303	7983931	-	3496	protein_coding	ceruloplasmin%2C transcript variant X1 && sp|P00450|CERU_HUMAN Ceruloplasmin OS=Homo sapiens OX=9606 GN=CP PE=1 SV=1 && PF07731:Multicopper oxidase|PF07732:Multicopper oxidase	-
103389016	381.3	641.888	343.274	64.6393	138.412	106.302	455.487	103.118	2.14401	1.13e-07	5.27e-06	bcl3	NC_024319.1	21856727	21881551	-	4064	protein_coding	B cell CLL/lymphoma 3%2C transcript variant X1 && sp|Q9Z2F6|BCL3_MOUSE B-cell lymphoma 3 protein homolog OS=Mus musculus OX=10090 GN=Bcl3 PE=1 SV=2 && PF12796:Ankyrin repeats (3 copies)	-
103378131	129.73	104.117	95.8191	17.7237	34.3169	23.0655	109.889	25.0354	2.14037	1.15e-07	5.38e-06	psph	NC_024310.1	12169194	12172399	-	970	protein_coding	phosphoserine phosphatase && sp|P78330|SERB_HUMAN Phosphoserine phosphatase OS=Homo sapiens OX=9606 GN=PSPH PE=1 SV=2 && PF00702:haloacid dehalogenase-like hydrolase	-
103377215	1550.62	1725.51	2495.95	649.52	778.994	667.897	1924.03	698.804	1.46133	1.21e-07	5.61e-06	LOC103377215	NC_024309.1	10566971	10572575	-	2316	protein_coding	glycine--tRNA ligase && sp|Q5RBL1|GARS_PONAB Glycine--tRNA ligase OS=Pongo abelii OX=9601 GN=GARS1 PE=2 SV=1 && PF03129:Anticodon binding domain|PF00458:WHEP-TRS domain|PF00587:tRNA synthetase class II core domain (G, H, P, S and T)	-
103395125	10068.1	4685.27	5950.09	2270.71	1250.28	1610.58	6901.14	1710.52	2.01236	1.25e-07	5.78e-06	aldoc	NC_024325.1	8091836	8100215	+	2290	protein_coding	aldolase%2C fructose-bisphosphate C && sp|Q8JH70|ALDCB_DANRE Fructose-bisphosphate aldolase C-B OS=Danio rerio OX=7955 GN=aldocb PE=2 SV=1 && PF00274:Fructose-bisphosphate aldolase class-I	-
103381588	4022.49	1131.14	2763.87	407.644	504.459	596.695	2639.17	502.933	2.39169	1.25e-07	5.78e-06	LOC103381588	NC_024314.1	3290584	3299397	+	1998	protein_coding	sulfotransferase 1C1-like && sp|P50237|ST1C1_RAT Sulfotransferase 1C1 OS=Rattus norvegicus OX=10116 GN=Sult1c1 PE=1 SV=1 && PF00685:Sulfotransferase domain	-
103393866	80.6427	52.564	88.3768	6.25541	5.71949	16.0456	73.8612	9.34016	2.97193	1.27e-07	5.84e-06	tcf19	NC_024324.1	1136761	1143134	-	3207	protein_coding	transcription factor 19 && sp|Q9Y242|TCF19_HUMAN Transcription factor 19 OS=Homo sapiens OX=9606 GN=TCF19 PE=1 SV=2 && PF00498:FHA domain	-
103383245	10.5186	25.2712	8.37254	288.791	76.6411	104.296	14.7208	156.576	-3.41859	1.3e-07	5.99e-06	slc5a10	NC_024315.1	1434660	1453515	+	2329	protein_coding	solute carrier family 5 member 10 && sp|A0PJK1|SC5AA_HUMAN Sodium/glucose cotransporter 5 OS=Homo sapiens OX=9606 GN=SLC5A10 PE=1 SV=2 && PF00474:Sodium:solute symporter family	-
103394268	15029.3	23888.3	6386.39	136600	232537	46137.1	15101.4	138425	-3.19636	1.31e-07	6e-06	LOC103394268	NC_024324.1	9247162	9248640	-	620	protein_coding	type-4 ice-structuring protein LS-12-like && sp|Q8JI37|AFP4_PAROL Type-4 ice-structuring protein OS=Paralichthys olivaceus OX=8255 PE=3 SV=1 && -	-
103378897	1027.32	1294.89	904.234	268.983	419.81	410.165	1075.48	366.319	1.55388	1.32e-07	6.02e-06	LOC103378897	NC_024311.1	7867025	7870623	-	2332	protein_coding	BTB/POZ domain-containing protein KCTD12-like%2C transcript variant X2 && sp|Q96CX2|KCD12_HUMAN BTB/POZ domain-containing protein KCTD12 OS=Homo sapiens OX=9606 GN=KCTD12 PE=1 SV=1 && PF02214:BTB/POZ domain	-
103384353	1125.49	885.502	1145.18	162.641	378.63	305.869	1052.06	282.38	1.89815	1.32e-07	6.02e-06	LOC103384353	NC_024315.1	19438307	19445479	+	1801	protein_coding	pyrroline-5-carboxylate reductase 1%2C mitochondrial-like && sp|P32322|P5CR1_HUMAN Pyrroline-5-carboxylate reductase 1, mitochondrial OS=Homo sapiens OX=9606 GN=PYCR1 PE=1 SV=2 && PF03807:NADP oxidoreductase coenzyme F420-dependent|PF14748:Pyrroline-5-carboxylate reductase dimerisation	-
103386593	3003.06	2802.07	6018.93	1132.23	391.213	531.51	3941.35	684.984	2.52441	1.32e-07	6.02e-06	LOC103386593	NC_024317.1	16237038	16252549	-	3991	protein_coding	solute carrier family 2%2C facilitated glucose transporter member 1 && sp|P46896|GTR1_CHICK Solute carrier family 2, facilitated glucose transporter member 1 OS=Gallus gallus OX=9031 GN=SLC2A1 PE=1 SV=1 && PF00083:Sugar (and other) transporter	-
103381335	89.4082	49.5315	138.612	11.4683	12.5829	15.0427	92.5173	13.0313	2.82734	1.34e-07	6.08e-06	nsl1	NC_024313.1	13454585	13458243	-	2193	protein_coding	NSL1%2C MIS12 kinetochore complex component && - && PF08641:Kinetochore protein Mis14 like	-
103390367	1855.66	1036.12	1310.77	532.753	435.825	431.225	1400.85	466.601	1.58619	1.36e-07	6.15e-06	ugcg	NC_024320.1	27071615	27085893	+	2791	protein_coding	UDP-glucose ceramide glucosyltransferase && sp|Q16739|CEGT_HUMAN Ceramide glucosyltransferase OS=Homo sapiens OX=9606 GN=UGCG PE=1 SV=1 && PF13506:Glycosyl transferase family 21	-
103376892	1218.41	1164.5	2201.05	494.177	393.501	259.738	1527.98	382.472	1.99841	1.4e-07	6.33e-06	LOC103376892	NC_024307.1	7056911	7060543	-	1653	protein_coding	serine protease HTRA2%2C mitochondrial-like%2C transcript variant X2 && sp|A0JNK3|HTRA2_BOVIN Serine protease HTRA2, mitochondrial OS=Bos taurus OX=9913 GN=HTRA2 PE=2 SV=1 && PF17820:PDZ domain|PF13365:Trypsin-like peptidase domain	-
103381368	1072.02	576.183	2066.16	78.1926	142.987	264.752	1238.12	161.977	2.93386	1.42e-07	6.4e-06	rrm2	NC_024313.1	13786847	13789698	+	1585	protein_coding	ribonucleotide reductase regulatory subunit M2 && sp|P79733|RIR2_DANRE Ribonucleoside-diphosphate reductase subunit M2 OS=Danio rerio OX=7955 GN=rrm2 PE=1 SV=1 && PF00268:Ribonucleotide reductase, small chain	-
103387134	16.6545	15.1627	29.769	281.494	142.987	73.208	20.5287	165.896	-3.01349	1.43e-07	6.43e-06	kcng3	NC_024318.1	5503002	5505814	-	2720	protein_coding	potassium voltage-gated channel modifier subfamily G member 3 && sp|Q8R523|KCNG3_RAT Potassium voltage-gated channel subfamily G member 3 OS=Rattus norvegicus OX=10116 GN=Kcng3 PE=2 SV=2 && PF00520:Ion transport protein|PF02214:BTB/POZ domain	-
103386390	253.323	561.02	508.864	79.2352	132.692	96.2735	441.069	102.734	2.10291	1.45e-07	6.49e-06	mars	NC_024317.1	12587398	12598217	-	2987	protein_coding	methionyl-tRNA synthetase%2C transcript variant X1 && sp|P56192|SYMC_HUMAN Methionine--tRNA ligase, cytoplasmic OS=Homo sapiens OX=9606 GN=MARS1 PE=1 SV=2 && PF00458:WHEP-TRS domain|PF09334:tRNA synthetases class I (M)|PF18485:Glutathione S-transferase, N-terminal domain	-
103379922	1531.33	445.783	919.119	232.493	149.851	151.43	965.412	177.925	2.43995	1.47e-07	6.57e-06	isyna1	NC_024307.1	13116112	13123357	-	2298	protein_coding	inositol-3-phosphate synthase 1%2C transcript variant X2 && sp|Q7ZXY0|INO1A_XENLA Inositol-3-phosphate synthase 1-A OS=Xenopus laevis OX=8355 GN=isyna1-a PE=2 SV=1 && PF07994:Myo-inositol-1-phosphate synthase|PF01658:Myo-inositol-1-phosphate synthase	-
103388008	263.842	490.261	385.137	1262.55	1157.62	1013.88	379.746	1144.68	-1.59256	1.54e-07	6.89e-06	sh3d21	NC_024319.1	2996582	3013904	+	1256	protein_coding	SH3 domain containing 21%2C transcript variant X2 && sp|Q96B97|SH3K1_HUMAN SH3 domain-containing kinase-binding protein 1 OS=Homo sapiens OX=9606 GN=SH3KBP1 PE=1 SV=2 && PF14604:Variant SH3 domain	-
103381680	465.449	147.584	104.192	18.7662	35.4608	25.0712	239.075	26.4328	3.18007	1.59e-07	7.08e-06	dcxr	NC_024314.1	4632107	4635781	+	932	protein_coding	dicarbonyl and L-xylulose reductase && sp|Q920P0|DCXR_RAT L-xylulose reductase OS=Rattus norvegicus OX=10116 GN=Dcxr PE=1 SV=1 && PF00106:short chain dehydrogenase	-
103391032	72.7537	31.3362	24.1873	193.918	281.399	221.63	42.7591	232.315	-2.43742	1.62e-07	7.21e-06	col23a1	NC_024321.1	11204438	11336969	+	4588	protein_coding	collagen type XXIII alpha 1 chain%2C transcript variant X1 && - && -	-
103387686	989.626	1057.35	852.139	2045.52	1912.6	2213.29	966.37	2057.13	-1.09016	1.71e-07	7.56e-06	LOC103387686	NC_024318.1	15334333	15346960	-	3151	protein_coding	phosphatidylinositol 3%2C4%2C5-trisphosphate 3-phosphatase and dual-specificity protein phosphatase PTEN%2C transcript variant X1 && sp|P60483|PTEN_CANLF Phosphatidylinositol 3,4,5-trisphosphate 3-phosphatase and dual-specificity protein phosphatase PTEN OS=Canis lupus familiaris OX=9615 GN=PTEN PE=2 SV=1 && PF10409:C2 domain of PTEN tumour-suppressor protein|PF00782:Dual specificity phosphatase,…	-
103379590	882.687	962.326	1227.97	452.475	401.508	325.926	1024.33	393.303	1.38115	1.73e-07	7.62e-06	tes	NC_024312.1	2481646	2488924	-	2627	protein_coding	testin LIM domain protein && sp|Q7ZXE9|TES_XENLA Testin OS=Xenopus laevis OX=8355 GN=tes PE=2 SV=1 && PF06297:PET Domain|PF00412:LIM domain	-
103384513	324.324	22.2386	421.418	6.25541	19.4463	4.0114	255.993	9.90435	4.70151	1.73e-07	7.62e-06	LOC103384513	NC_024307.1	20813635	20829225	-	2910	protein_coding	E3 ubiquitin-protein ligase TRIM39-like && sp|Q02084|A33_PLEWA Zinc-binding protein A33 OS=Pleurodeles waltl OX=8319 PE=1 SV=2 && PF00643:B-box zinc finger|PF00622:SPRY domain|PF00097:Zinc finger, C3HC4 type (RING finger)|PF13765:SPRY-associated domain	-
103386056	2172.09	2207.69	2666.19	6674.52	5466.69	4707.37	2348.66	5616.19	-1.25775	1.83e-07	8.03e-06	LOC103386056	NC_024317.1	5080249	5093947	-	2853	protein_coding	LIM domain and actin-binding protein 1-like%2C transcript variant X3 && sp|B0KYV5|LIMA1_PIG LIM domain and actin-binding protein 1 OS=Sus scrofa OX=9823 GN=LIMA1 PE=2 SV=1 && PF00412:LIM domain	-
103398710	848.502	533.727	928.422	212.684	227.636	295.84	770.217	245.387	1.65006	1.84e-07	8.09e-06	bri3bp	NW_007585123.1	45555	50504	-	3806	protein_coding	BRI3 binding protein && sp|Q8BXV2|BRI3B_MOUSE BRI3-binding protein OS=Mus musculus OX=10090 GN=Bri3bp PE=1 SV=1 && PF14965:Negative regulator of p53/TP53	-
103398505	631.993	481.163	308.854	1638.92	1628.91	1325.77	474.003	1531.2	-1.69142	1.86e-07	8.15e-06	znf395	NW_007585113.1	175085	186102	-	3042	protein_coding	zinc finger protein 395%2C transcript variant X5 && sp|Q6DFC8|ZN395_XENLA Zinc finger protein 395 OS=Xenopus laevis OX=8355 GN=znf395 PE=2 SV=1 && -	-
103381582	154.273	151.627	112.564	505.646	315.716	443.259	139.488	421.54	-1.59607	1.87e-07	8.16e-06	galnt16	NC_024307.1	15894711	15926781	-	2718	protein_coding	polypeptide N-acetylgalactosaminyltransferase 16 && sp|Q9JJ61|GLT16_MOUSE Polypeptide N-acetylgalactosaminyltransferase 16 OS=Mus musculus OX=10090 GN=Galnt16 PE=2 SV=2 && PF00652:Ricin-type beta-trefoil lectin domain|PF00535:Glycosyl transferase family 2	-
103387144	184.076	453.87	66.05	3868.97	4060.84	858.439	234.665	2929.42	-3.64241	1.87e-07	8.16e-06	abcg5	NC_024318.1	5401676	5407860	+	2392	protein_coding	ATP binding cassette subfamily G member 5 && sp|Q9H222|ABCG5_HUMAN ATP-binding cassette sub-family G member 5 OS=Homo sapiens OX=9606 GN=ABCG5 PE=1 SV=1 && PF01061:ABC-2 type transporter|PF00005:ABC transporter	-
107989866	729.291	251.701	256.758	88.6183	28.5974	38.1083	412.583	51.7747	2.99344	1.96e-07	8.51e-06	LOC107989866	NC_024323.1	1104395	1113077	-	2039	protein_coding	hemicentin-1 && sp|Q8NDA2|HMCN2_HUMAN Hemicentin-2 OS=Homo sapiens OX=9606 GN=HMCN2 PE=2 SV=3 && PF13927:Immunoglobulin domain	-
103393170	8406.13	13146.1	10757.8	4494.51	4510.39	4207.95	10770	4404.28	1.29002	1.99e-07	8.61e-06	stat3	NC_024323.1	10109443	10121959	-	3523	protein_coding	signal transducer and activator of transcription 3%2C transcript variant X1 && sp|P52631|STAT3_RAT Signal transducer and activator of transcription 3 OS=Rattus norvegicus OX=10116 GN=Stat3 PE=1 SV=1 && PF02864:STAT protein, DNA binding domain|PF01017:STAT protein, all-alpha domain|PF00017:SH2 domain|PF02865:STAT protein, protein interaction domain	STAT
103398497	224.397	120.291	181.405	22.9365	42.3242	48.1367	175.364	37.7992	2.21494	2.06e-07	8.91e-06	LOC103398497	NW_007585113.1	6211	13031	+	3546	protein_coding	toll-like receptor 5%2C transcript variant X2 && sp|O60602|TLR5_HUMAN Toll-like receptor 5 OS=Homo sapiens OX=9606 GN=TLR5 PE=1 SV=4 && PF13855:Leucine rich repeat|PF01582:TIR domain	-
103395184	893.206	1020.95	1601.95	358.644	436.969	299.852	1172.04	365.155	1.68289	2.11e-07	9.08e-06	c1qbp	NC_024325.1	9186474	9189048	-	1347	protein_coding	complement C1q binding protein && sp|O35796|C1QBP_RAT Complement component 1 Q subcomponent-binding protein, mitochondrial OS=Rattus norvegicus OX=10116 GN=C1qbp PE=1 SV=2 && PF02330:Mitochondrial glycoprotein	-
103393009	268.225	77.8352	76.2832	14.596	13.7268	19.0541	140.781	15.7923	3.15519	2.13e-07	9.18e-06	LOC103393009	NC_024323.1	8287742	8295327	+	1395	protein_coding	arf-GAP with dual PH domain-containing protein 1-like && sp|O75689|ADAP1_HUMAN Arf-GAP with dual PH domain-containing protein 1 OS=Homo sapiens OX=9606 GN=ADAP1 PE=1 SV=2 && PF01412:Putative GTPase activating protein for Arf|PF00169:PH domain	-
103395923	379.547	546.868	510.725	1036.31	1331.5	1529.34	479.047	1299.05	-1.43965	2.21e-07	9.5e-06	LOC103395923	NC_024326.1	1841075	1855393	+	5339	protein_coding	nuclear receptor ROR-beta-like%2C transcript variant X2 && sp|P45446|RORB_RAT Nuclear receptor ROR-beta OS=Rattus norvegicus OX=10116 GN=Rorb PE=1 SV=3 && PF00104:Ligand-binding domain of nuclear hormone receptor|PF00105:Zinc finger, C4 type (two domains)	THR-like
103386536	453.177	497.336	461.42	2038.22	957.442	1595.53	470.644	1530.4	-1.70144	2.35e-07	1.01e-05	LOC103386536	NC_024317.1	15592672	15595900	-	1024	protein_coding	cysteine and glycine-rich protein 1-like && sp|P47875|CSRP1_RAT Cysteine and glycine-rich protein 1 OS=Rattus norvegicus OX=10116 GN=Csrp1 PE=1 SV=2 && PF00412:LIM domain	-
103378918	227.903	259.788	365.601	753.777	788.145	1233.5	284.431	925.142	-1.70187	2.41e-07	1.03e-05	tnfaip8l3	NC_024311.1	7929521	7944441	-	1473	protein_coding	TNF alpha induced protein 8 like 3%2C transcript variant X2 && sp|Q7T3D0|TP8L3_DANRE Tumor necrosis factor alpha-induced protein 8-like protein 3 OS=Danio rerio OX=7955 GN=tnfaip8l3 PE=2 SV=1 && PF05527:Domain of unknown function (DUF758)	-
103387200	403.214	300.221	430.721	155.343	101.807	127.362	378.052	128.17	1.55981	2.42e-07	1.03e-05	LOC103387200	NC_024318.1	5934315	5941770	-	3875	protein_coding	sideroflexin-1-like && sp|A5A761|SFXN1_PIG Sideroflexin-1 OS=Sus scrofa OX=9823 GN=SFXN1 PE=2 SV=1 && PF03820:Tricarboxylate carrier	-
103378317	113.075	28.3037	98.6099	6.25541	9.15118	7.01994	79.9962	7.47551	3.42563	2.42e-07	1.03e-05	thyn1	NC_024310.1	14815250	14818991	+	1002	protein_coding	thymocyte nuclear protein 1%2C transcript variant X2 && sp|Q6PFL8|THYN1_DANRE Thymocyte nuclear protein 1 OS=Danio rerio OX=7955 GN=thyn1 PE=2 SV=1 && PF01878:EVE domain	-
103385172	1791.67	890.556	2041.04	384.708	497.595	416.182	1574.42	432.828	1.86329	2.55e-07	1.08e-05	LOC103385172	NC_024307.1	21851582	21853494	+	1063	protein_coding	histone H2A.Z && sp|Q5ZMD6|H2AZ_CHICK Histone H2A.Z OS=Gallus gallus OX=9031 GN=H2AFZ PE=1 SV=3 && PF00125:Core histone H2A/H2B/H3/H4|PF16211:C-terminus of histone H2A	-
103395417	82.3958	381.089	83.7254	1945.43	1988.09	922.621	182.403	1618.72	-3.15074	2.57e-07	1.09e-05	LOC103395417	NC_024325.1	13764334	13769112	+	1990	protein_coding	diacylglycerol O-acyltransferase 2 && sp|Q96PD7|DGAT2_HUMAN Diacylglycerol O-acyltransferase 2 OS=Homo sapiens OX=9606 GN=DGAT2 PE=1 SV=2 && PF03982:Diacylglycerol acyltransferase	-
103385986	99.0503	94.0087	196.29	7.29798	2.28779	23.0655	129.783	10.8838	3.56208	2.62e-07	1.1e-05	espl1	NC_024317.1	3992558	4004686	-	6222	protein_coding	extra spindle pole bodies like 1%2C separase && sp|Q14674|ESPL1_HUMAN Separin OS=Homo sapiens OX=9606 GN=ESPL1 PE=1 SV=3 && PF03568:Peptidase family C50	-
103383606	4.38276	30.3254	15.8148	138.662	102.951	222.632	16.841	154.748	-3.21033	2.68e-07	1.13e-05	sfrp2	NC_024315.1	6549468	6551199	-	1149	protein_coding	secreted frizzled related protein 2 && sp|Q96HF1|SFRP2_HUMAN Secreted frizzled-related protein 2 OS=Homo sapiens OX=9606 GN=SFRP2 PE=1 SV=2 && PF01392:Fz domain|PF01759:UNC-6/NTR/C345C module	-
103376740	1342	788.46	933.073	287.749	408.371	250.712	1021.18	315.611	1.69496	2.74e-07	1.15e-05	LOC103376740	NC_024308.1	18580671	18590334	+	2526	protein_coding	enoyl-CoA hydratase domain-containing protein 2%2C mitochondrial%2C transcript variant X1 && sp|Q2TBT3|ECHD2_BOVIN Enoyl-CoA hydratase domain-containing protein 2, mitochondrial OS=Bos taurus OX=9913 GN=ECHDC2 PE=2 SV=1 && PF00378:Enoyl-CoA hydratase/isomerase	-
103398535	497.881	510.477	480.956	1409.55	1583.15	952.706	496.438	1315.14	-1.40535	2.75e-07	1.15e-05	LOC103398535	NW_007585114.1	59595	72715	+	4953	protein_coding	Golgi apparatus protein 1-like%2C transcript variant X1 && sp|Q02391|GSLG1_CHICK Golgi apparatus protein 1 OS=Gallus gallus OX=9031 GN=GLG1 PE=1 SV=1 && PF00839:Cysteine rich repeat	-
103384588	4578.23	4890.48	3318.32	1520.06	1821.08	1102.13	4262.34	1481.09	1.52514	2.76e-07	1.15e-05	LOC103384588	NC_024316.1	2860886	2869868	+	2396	protein_coding	glucose-6-phosphate 1-dehydrogenase%2C transcript variant X1 && sp|P54996|G6PD_TAKRU Glucose-6-phosphate 1-dehydrogenase OS=Takifugu rubripes OX=31033 GN=g6pd PE=3 SV=1 && PF02781:Glucose-6-phosphate dehydrogenase, C-terminal domain|PF00479:Glucose-6-phosphate dehydrogenase, NAD binding domain	-
103387994	397.954	436.686	302.342	936.227	899.103	860.444	378.994	898.591	-1.24575	2.78e-07	1.16e-05	dedd2	NC_024319.1	1567172	1577701	-	4176	protein_coding	death effector domain containing 2%2C transcript variant X3 && sp|Q8WXF8|DEDD2_HUMAN DNA-binding death effector domain-containing protein 2 OS=Homo sapiens OX=9606 GN=DEDD2 PE=1 SV=1 && PF01335:Death effector domain	-
103399092	40.3214	11.1193	17.6754	114.683	134.98	214.61	23.0387	154.757	-2.7407	2.82e-07	1.17e-05	LOC103399092	NC_024308.1	10869549	10872424	-	2119	protein_coding	interferon-induced protein with tetratricopeptide repeats 1B-like%2C transcript variant X1 && sp|Q60462|IFIT2_CRIGR Interferon-induced protein with tetratricopeptide repeats 2 OS=Cricetulus griseus OX=10029 GN=IFIT2 PE=2 SV=1 && -	-
103377835	483.856	365.926	520.028	108.427	187.599	148.422	456.604	148.149	1.62534	2.83e-07	1.17e-05	wars	NC_024307.1	8189395	8193639	-	2041	protein_coding	tryptophanyl-tRNA synthetase%2C transcript variant X1 && sp|Q5R4J1|SYWC_PONAB Tryptophan--tRNA ligase, cytoplasmic OS=Pongo abelii OX=9601 GN=WARS1 PE=2 SV=2 && PF00458:WHEP-TRS domain|PF00579:tRNA synthetases class I (W and Y)	-
103381220	1178.96	494.304	600.962	183.492	218.484	142.405	758.076	181.46	2.06366	2.83e-07	1.17e-05	LOC103381220	NC_024313.1	12251313	12255127	+	1670	protein_coding	cytosolic 5'-nucleotidase 1A-like && sp|A3KFX0|5NT1A_MOUSE Cytosolic 5'-nucleotidase 1A OS=Mus musculus OX=10090 GN=Nt5c1a PE=1 SV=1 && PF06189:5'-nucleotidase	-
103381752	2295.69	1160.45	1924.75	503.561	538.776	656.866	1793.63	566.401	1.66302	2.96e-07	1.22e-05	rara	NC_024314.1	5595063	5771352	+	12077	protein_coding	retinoic acid receptor alpha%2C transcript variant X7 && sp|Q90271|RARAA_DANRE Retinoic acid receptor alpha-A OS=Danio rerio OX=7955 GN=raraa PE=2 SV=2 && PF00105:Zinc finger, C4 type (two domains)|PF00104:Ligand-binding domain of nuclear hormone receptor	THR-like
103381400	108.692	44.4772	104.192	9.38312	13.7268	15.0427	85.7871	12.7175	2.75573	2.96e-07	1.22e-05	cenpt	NC_024314.1	21800	31610	-	2563	protein_coding	centromere protein T%2C transcript variant X1 && sp|F1NPG5|CENPT_CHICK Centromere protein T OS=Gallus gallus OX=9031 GN=CENPT PE=1 SV=2 && PF15511:Centromere kinetochore component CENP-T histone fold	-
103388281	153.396	262.82	121.867	811.118	665.748	526.496	179.361	667.787	-1.89767	2.97e-07	1.22e-05	LOC103388281	NC_024319.1	5215188	5230494	+	2658	protein_coding	ceramide synthase 2-like%2C transcript variant X2 && sp|Q3ZBF8|CERS2_BOVIN Ceramide synthase 2 OS=Bos taurus OX=9913 GN=CERS2 PE=2 SV=1 && PF00046:Homeodomain|PF03798:TLC domain	Homeobox
103382317	0.876551	4.04339	1.86056	60.469	33.173	27.0769	2.26017	40.2396	-4.1851	3.04e-07	1.25e-05	grid2ip	NC_024314.1	13548379	13580987	+	4612	protein_coding	Grid2 interacting protein && sp|Q6ZM86|GRD2I_DANRE Delphilin OS=Danio rerio OX=7955 GN=grid2ip PE=3 SV=1 && PF00595:PDZ domain|PF17820:PDZ domain|PF02181:Formin Homology 2 Domain	-
103378640	168.298	184.985	173.033	362.814	394.645	456.296	175.438	404.585	-1.20614	3.15e-07	1.29e-05	nkpd1	NC_024311.1	1758745	1763339	-	3138	protein_coding	NTPase KAP family P-loop domain containing 1 && sp|Q17RQ9|NKPD1_HUMAN NTPase KAP family P-loop domain-containing protein 1 OS=Homo sapiens OX=9606 GN=NKPD1 PE=2 SV=1 && PF07693:KAP family P-loop domain	-
103381999	40.3214	98.0521	32.5599	6.25541	3.43169	3.00855	56.9778	4.23188	3.74721	3.2e-07	1.31e-05	LOC103381999	NC_024314.1	10157698	10160329	+	1347	protein_coding	fibroblast growth factor 21 && sp|Q9HCT0|FGF22_HUMAN Fibroblast growth factor 22 OS=Homo sapiens OX=9606 GN=FGF22 PE=1 SV=1 && PF00167:Fibroblast growth factor	-
103384728	139.372	81.8786	173.033	12.5108	34.3169	20.057	131.428	22.2949	2.56646	3.25e-07	1.33e-05	haus7	NC_024316.1	5131142	5137023	+	1724	protein_coding	HAUS augmin like complex subunit 7%2C transcript variant X2 && sp|Q8BKT8|HAUS7_MOUSE HAUS augmin-like complex subunit 7 OS=Mus musculus OX=10090 GN=Haus7 PE=1 SV=2 && -	-
103382246	140.248	112.204	238.152	34.4048	24.0218	44.1253	163.535	34.184	2.25482	3.41e-07	1.39e-05	LOC103382246	NC_024314.1	14436660	14452526	+	4572	protein_coding	kinesin-like protein KIF20A%2C transcript variant X1 && sp|Q80WE4|KI20B_MOUSE Kinesin-like protein KIF20B OS=Mus musculus OX=10090 GN=Kif20b PE=1 SV=3 && PF00225:Kinesin motor domain	-
103378484	698.611	421.523	1084.71	168.896	150.994	219.624	734.948	179.838	2.03055	3.43e-07	1.39e-05	smc4	NC_024310.1	17355063	17372270	+	5003	protein_coding	structural maintenance of chromosomes 4%2C transcript variant X1 && sp|P50532|SMC4_XENLA Structural maintenance of chromosomes protein 4 OS=Xenopus laevis OX=8355 GN=smc4 PE=1 SV=1 && PF06470:SMC proteins Flexible Hinge Domain|PF02463:RecF/RecN/SMC N terminal domain	-
103395900	1569.9	2106.6	2226.17	872.63	793.865	883.51	1967.56	850.002	1.21065	3.5e-07	1.42e-05	LOC103395900	NC_024326.1	1327151	1335274	-	2991	protein_coding	calcium-binding mitochondrial carrier protein Aralar1-like%2C transcript variant X2 && sp|Q8BH59|CMC1_MOUSE Calcium-binding mitochondrial carrier protein Aralar1 OS=Mus musculus OX=10090 GN=Slc25a12 PE=1 SV=1 && PF00153:Mitochondrial carrier protein	-
103386369	112613	84350.1	63897.4	9119.35	26936.5	7174.38	86953.5	14410.1	2.59318	3.55e-07	1.44e-05	alas1	NC_024317.1	12105048	12110155	-	2275	protein_coding	5'-aminolevulinate synthase 1%2C transcript variant X1 && sp|P43091|HEM1_OPSTA 5-aminolevulinate synthase, nonspecific, mitochondrial OS=Opsanus tau OX=8068 GN=alas1 PE=2 SV=1 && PF00155:Aminotransferase class I and II|PF09029:5-aminolevulinate synthase presequence	-
103388379	2012.56	2377.51	1597.29	5150.29	6711.25	4360.39	1995.79	5407.31	-1.43796	3.7e-07	1.49e-05	LOC103388379	NC_024307.1	26860457	26863343	+	1346	protein_coding	cell death activator CIDE-B && sp|O70303|CIDEB_MOUSE Cell death activator CIDE-B OS=Mus musculus OX=10090 GN=Cideb PE=1 SV=2 && PF02017:CIDE-N domain	-
103378803	190.212	47.5098	146.985	13.5534	5.71949	0	128.235	6.42429	4.32346	3.71e-07	1.49e-05	muc15	NC_024311.1	6255592	6266902	+	2534	protein_coding	mucin 15%2C cell surface associated && - && PF15672:Cell-membrane associated Mucin15	-
103398216	383.053	516.543	360.019	1038.4	980.32	961.732	419.872	993.483	-1.24316	3.71e-07	1.49e-05	LOC103398216	NC_024308.1	10196970	10235923	+	2468	protein_coding	SH2 domain-containing adapter protein D-like && sp|Q96IW2|SHD_HUMAN SH2 domain-containing adapter protein D OS=Homo sapiens OX=9606 GN=SHD PE=1 SV=1 && PF00017:SH2 domain	-
103395510	191.965	249.679	226.059	508.773	521.617	476.353	222.567	502.248	-1.17494	3.95e-07	1.58e-05	LOC103395510	NC_024325.1	14548575	14580157	-	5095	protein_coding	T-lymphoma invasion and metastasis-inducing protein 1-like && sp|Q13009|TIAM1_HUMAN Rho guanine nucleotide exchange factor TIAM1 OS=Homo sapiens OX=9606 GN=TIAM1 PE=1 SV=2 && PF00169:PH domain|PF18385:T-lymphoma invasion and metastasis CC-Ex domain|PF00595:PDZ domain|PF02196:Raf-like Ras-binding domain|PF00621:RhoGEF domain	-
103386365	746.822	1144.28	1230.76	121.981	351.177	231.658	1040.62	234.938	2.1478	3.98e-07	1.59e-05	iars	NC_024317.1	11954968	11985903	-	4308	protein_coding	isoleucyl-tRNA synthetase%2C transcript variant X1 && sp|P41252|SYIC_HUMAN Isoleucine--tRNA ligase, cytoplasmic OS=Homo sapiens OX=9606 GN=IARS1 PE=1 SV=2 && PF08264:Anticodon-binding domain of tRNA|PF00133:tRNA synthetases class I (I, L, M and V)	-
103380018	68.371	118.269	116.285	329.452	268.816	349.994	100.975	316.087	-1.64861	3.99e-07	1.59e-05	LOC103380018	NC_024312.1	8540749	8739889	+	9132	protein_coding	nuclear receptor ROR-alpha%2C transcript variant X2 && sp|F1QLY4|RORAA_DANRE Nuclear receptor ROR-alpha A OS=Danio rerio OX=7955 GN=roraa PE=2 SV=2 && PF00104:Ligand-binding domain of nuclear hormone receptor|PF00105:Zinc finger, C4 type (two domains)	THR-like
103378833	135.865	177.909	42.793	9.38312	13.7268	1.00285	118.856	8.03758	3.8991	4.01e-07	1.6e-05	slc24a5	NC_024311.1	6955661	6962558	+	2657	protein_coding	solute carrier family 24 member 5 && sp|Q49SH1|NCKX5_DANRE Sodium/potassium/calcium exchanger 5 OS=Danio rerio OX=7955 GN=slc24a5 PE=2 SV=1 && PF01699:Sodium/calcium exchanger protein	-
103387040	34010.2	46433.2	20069	3854.38	10199	7233.55	33504.1	7095.64	2.23935	4.05e-07	1.61e-05	LOC103387040	NC_024318.1	3720768	3729204	+	1688	protein_coding	deleted in malignant brain tumors 1 protein-like && sp|Q60997|DMBT1_MOUSE Deleted in malignant brain tumors 1 protein OS=Mus musculus OX=10090 GN=Dmbt1 PE=1 SV=2 && PF00431:CUB domain|PF00100:Zona pellucida-like domain	-
novel.504	85.0255	41.4447	43.7233	227.28	250.514	185.527	56.7311	221.107	-1.9585	4.11e-07	1.63e-05	-	NC_024321.1	7379272	7385051	+	5780	-	- && - && -	-
103390369	62.2351	59.6399	42.793	497.305	157.858	229.652	54.8894	294.938	-2.42619	4.16e-07	1.64e-05	capsl	NC_024320.1	27108517	27112847	+	1125	protein_coding	calcyphosine like%2C transcript variant X5 && sp|Q8WWF8|CAPSL_HUMAN Calcyphosin-like protein OS=Homo sapiens OX=9606 GN=CAPSL PE=2 SV=4 && PF13499:EF-hand domain pair|PF13833:EF-hand domain pair	-
103391874	1138.64	841.024	1377.75	326.324	414.091	459.305	1119.14	399.907	1.48475	4.18e-07	1.65e-05	agps	NC_024322.1	6706574	6737031	+	4667	protein_coding	alkylglycerone phosphate synthase && sp|P97275|ADAS_CAVPO Alkyldihydroxyacetonephosphate synthase, peroxisomal OS=Cavia porcellus OX=10141 GN=AGPS PE=1 SV=1 && PF02913:FAD linked oxidases, C-terminal domain|PF01565:FAD binding domain	-
103393928	307.669	17.1844	92.098	7.29798	6.86338	2.0057	138.984	5.38902	4.69621	4.52e-07	1.78e-05	pkhd1l1	NC_024324.1	1953172	1983073	-	13209	protein_coding	PKHD1 like 1%2C transcript variant X2 && sp|Q86WI1|PKHL1_HUMAN Fibrocystin-L OS=Homo sapiens OX=9606 GN=PKHD1L1 PE=2 SV=2 && PF01833:IPT/TIG domain|PF10162:G8 domain	-
103379222	118.334	108.161	322.808	23.9791	16.0146	37.1054	183.101	25.6997	2.82875	4.57e-07	1.79e-05	nusap1	NC_024311.1	14765510	14769502	-	1883	protein_coding	nucleolar and spindle associated protein 1 && sp|A1L2F3|NUSAP_DANRE Nucleolar and spindle-associated protein 1 OS=Danio rerio OX=7955 GN=nusap1 PE=2 SV=2 && PF16006:Nucleolar and spindle-associated protein	-
103377359	765.229	325.493	537.703	111.555	125.829	175.499	542.808	137.627	1.97952	4.61e-07	1.81e-05	LOC103377359	NC_024309.1	12057294	12060649	-	1522	protein_coding	retinol dehydrogenase 12-like && sp|Q96NR8|RDH12_HUMAN Retinol dehydrogenase 12 OS=Homo sapiens OX=9606 GN=RDH12 PE=1 SV=3 && PF00106:short chain dehydrogenase	-
103394134	42.0745	34.3688	15.8148	131.364	177.304	122.348	30.7527	143.672	-2.22212	4.63e-07	1.81e-05	LOC103394134	NC_024324.1	4758429	4805513	-	6771	protein_coding	DNA-binding protein SATB1%2C transcript variant X1 && sp|Q01826|SATB1_HUMAN DNA-binding protein SATB1 OS=Homo sapiens OX=9606 GN=SATB1 PE=1 SV=1 && -	CUT
103385187	413.732	651.996	519.098	225.195	157.858	152.433	528.275	178.495	1.56477	4.73e-07	1.84e-05	LOC103385187	NC_024316.1	14656781	14659395	+	1618	protein_coding	tubulin alpha-1A chain && sp|P68362|TBA1A_CRIGR Tubulin alpha-1A chain OS=Cricetulus griseus OX=10029 GN=TUBA1A PE=2 SV=1 && PF03953:Tubulin C-terminal domain|PF00091:Tubulin/FtsZ family, GTPase domain	-
103387171	1003.65	823.84	1439.15	211.641	48.0437	237.675	1088.88	165.787	2.71426	4.73e-07	1.84e-05	ppp1r3c	NC_024318.1	5761787	5764972	-	2325	protein_coding	protein phosphatase 1 regulatory subunit 3C && sp|Q6P950|PR3CB_DANRE Protein phosphatase 1 regulatory subunit 3C-B OS=Danio rerio OX=7955 GN=ppp1r3cb PE=2 SV=1 && PF03370:Carbohydrate/starch-binding module (family 21)	-
103399830	101.68	21.2278	81.8649	4.17027	3.43169	7.01994	68.2575	4.87397	3.80064	4.74e-07	1.84e-05	rad54l	NC_024308.1	12412232	12418255	-	2966	protein_coding	RAD54 like && sp|F1Q8K0|RAD54_DANRE DNA repair and recombination protein RAD54-like OS=Danio rerio OX=7955 GN=rad54l PE=1 SV=1 && PF00176:SNF2 family N-terminal domain|PF00271:Helicase conserved C-terminal domain	-
103395941	403.214	1557.71	338.623	5284.78	7606.92	4073.57	766.517	5655.09	-2.88343	4.77e-07	1.85e-05	gamt	NC_024308.1	6510816	6513958	+	835	protein_coding	guanidinoacetate N-methyltransferase && sp|Q71N41|GAMT_DANRE Guanidinoacetate N-methyltransferase OS=Danio rerio OX=7955 GN=gamt PE=2 SV=2 && -	-
103387909	423.374	261.809	525.61	129.279	96.0874	128.365	403.598	117.91	1.77468	4.78e-07	1.85e-05	vrk1	NC_024307.1	26554987	26565274	-	1587	protein_coding	vaccinia related kinase 1 && sp|Q7ZUS1|VRK1_DANRE Serine/threonine-protein kinase VRK1 OS=Danio rerio OX=7955 GN=vrk1 PE=2 SV=1 && PF00069:Protein kinase domain	-
103380079	522.424	613.584	684.688	274.196	281.399	257.732	606.899	271.109	1.16266	4.83e-07	1.86e-05	calu	NC_024312.1	10070257	10075996	+	2676	protein_coding	calumenin && sp|B5X4E0|CALUB_SALSA Calumenin-B OS=Salmo salar OX=8030 GN=calub PE=2 SV=1 && -	-
103389359	1009.79	950.196	1190.76	2086.18	2586.35	2173.17	1050.25	2281.9	-1.11934	4.89e-07	1.89e-05	LOC103389359	NC_024320.1	5558402	5565349	-	4576	protein_coding	uncharacterized LOC103389359%2C transcript variant X1 && sp|A6NEL2|SWAHB_HUMAN Ankyrin repeat domain-containing protein SOWAHB OS=Homo sapiens OX=9606 GN=SOWAHB PE=1 SV=1 && PF12796:Ankyrin repeats (3 copies)	-
103377138	440.029	492.282	364.671	904.95	951.723	1003.85	432.327	953.508	-1.14145	4.98e-07	1.91e-05	LOC103377138	NC_024309.1	9214305	9230771	+	6245	protein_coding	spermatogenesis-associated protein 13%2C transcript variant X1 && sp|Q5DU57|SPT13_MOUSE Spermatogenesis-associated protein 13 OS=Mus musculus OX=10090 GN=Spata13 PE=1 SV=2 && PF00621:RhoGEF domain|PF00018:SH3 domain	-
103399970	424.251	318.417	133.961	1393.91	1259.43	1132.22	292.209	1261.85	-2.11024	4.99e-07	1.91e-05	dpt	NC_024308.1	15911350	15916923	-	1240	protein_coding	dermatopontin && sp|Q9QZZ6|DERM_MOUSE Dermatopontin OS=Mus musculus OX=10090 GN=Dpt PE=1 SV=1 && PF14704:Dermatopontin	-
103380772	49.9634	29.3145	127.449	0	4.57559	5.01424	68.9089	3.19661	4.43464	4.99e-07	1.91e-05	cenpw	NC_024313.1	4108152	4109989	+	601	protein_coding	centromere protein W && - && -	-
103395466	1731.19	1500.1	1684.74	590.094	837.333	539.533	1638.68	655.653	1.32209	5.04e-07	1.92e-05	LOC103395466	NC_024325.1	14174304	14178207	+	1987	protein_coding	pyruvate dehydrogenase E1 component subunit alpha%2C mitochondrial-like && sp|P29804|ODPA_PIG Pyruvate dehydrogenase E1 component subunit alpha, somatic form, mitochondrial (Fragment) OS=Sus scrofa OX=9823 GN=PDHA1 PE=1 SV=1 && PF00676:Dehydrogenase E1 component	-
103387331	3261.65	1759.88	2263.38	965.418	759.548	767.179	2428.3	830.715	1.54759	5.05e-07	1.92e-05	LOC103387331	NC_024318.1	8497189	8500707	+	1930	protein_coding	phosphoglycerate mutase 1 && sp|P18669|PGAM1_HUMAN Phosphoglycerate mutase 1 OS=Homo sapiens OX=9606 GN=PGAM1 PE=1 SV=2 && PF00300:Histidine phosphatase superfamily (branch 1)	-
103390617	563.622	390.187	681.897	1750.47	1328.06	1484.22	545.235	1520.92	-1.47971	5.06e-07	1.92e-05	LOC103390617	NC_024321.1	2959465	2969372	-	3688	protein_coding	integrin alpha-6-like && sp|P26007|ITA6_CHICK Integrin alpha-6 OS=Gallus gallus OX=9031 GN=ITGA6 PE=2 SV=1 && PF08441:Integrin alpha|PF01839:FG-GAP repeat	-
103398072	235.792	162.746	234.431	49.0007	44.612	81.2307	210.99	58.2812	1.85361	5.27e-07	2e-05	LOC103398072	NC_024328.1	15520992	15528976	+	3020	protein_coding	cell division cycle-associated protein 2-like%2C transcript variant X2 && sp|Q14B71|CDCA2_MOUSE Cell division cycle-associated protein 2 OS=Mus musculus OX=10090 GN=Cdca2 PE=1 SV=2 && PF15276:Protein phosphatase 1 binding	-
103393024	1090.43	1195.83	1700.56	4306.85	3347.04	3070.72	1328.94	3574.87	-1.42763	5.29e-07	2e-05	anks4b	NC_024323.1	7996283	7998553	-	1416	protein_coding	ankyrin repeat and sterile alpha motif domain containing 4B && sp|Q8N8V4|ANS4B_HUMAN Ankyrin repeat and SAM domain-containing protein 4B OS=Homo sapiens OX=9606 GN=ANKS4B PE=1 SV=2 && PF00536:SAM domain (Sterile alpha motif)|PF12796:Ankyrin repeats (3 copies)	-
103393640	28.0496	43.4664	13.024	141.789	167.009	121.345	28.18	143.381	-2.35092	5.32e-07	2.01e-05	LOC103393640	NC_024308.1	2351268	2360091	-	3732	protein_coding	acyl-coenzyme A thioesterase 11-like%2C transcript variant X2 && sp|Q8VHQ9|ACO11_MOUSE Acyl-coenzyme A thioesterase 11 OS=Mus musculus OX=10090 GN=Acot11 PE=1 SV=1 && PF03061:Thioesterase superfamily|PF01852:START domain	-
103397649	234.039	118.269	100.47	10.4257	36.6047	17.0484	150.926	21.3596	2.82879	5.34e-07	2.01e-05	LOC103397649	NC_024328.1	7056171	7059350	-	1251	protein_coding	gamma-glutamyl hydrolase-like && sp|Q92820|GGH_HUMAN Gamma-glutamyl hydrolase OS=Homo sapiens OX=9606 GN=GGH PE=1 SV=2 && PF07722:Peptidase C26	-
103380384	19880.2	9359.43	18146.1	5640.3	3997.92	4523.85	15795.2	4720.69	1.74242	5.37e-07	2.02e-05	LOC103380384	NC_024312.1	14776302	14782290	-	3793	protein_coding	L-lactate dehydrogenase A chain%2C transcript variant X2 && sp|P69083|LDHA_GILMI L-lactate dehydrogenase A chain OS=Gillichthys mirabilis OX=8222 GN=ldha PE=2 SV=2 && PF02866:lactate/malate dehydrogenase, alpha/beta C-terminal domain|PF00056:lactate/malate dehydrogenase, NAD binding domain	-
103389620	97.2972	81.8786	16.7451	427.453	599.402	362.028	65.3069	462.961	-2.82521	5.44e-07	2.04e-05	mpp4	NC_024320.1	11550533	11557095	+	2593	protein_coding	membrane palmitoylated protein 4%2C transcript variant X3 && sp|Q96JB8|MPP4_HUMAN MAGUK p55 subfamily member 4 OS=Homo sapiens OX=9606 GN=MPP4 PE=1 SV=2 && PF00625:Guanylate kinase|PF00595:PDZ domain|PF02828:L27 domain	-
103394874	99.0503	118.269	120.937	248.131	279.111	324.923	112.752	284.055	-1.33412	5.47e-07	2.05e-05	LOC103394874	NC_024325.1	3403100	3407541	-	1982	protein_coding	adenosine deaminase domain-containing protein 1-like%2C transcript variant X1 && sp|Q86SQ4|AGRG6_HUMAN Adhesion G-protein coupled receptor G6 OS=Homo sapiens OX=9606 GN=ADGRG6 PE=1 SV=3 && -	-
103399816	844.995	336.612	1323.79	182.449	44.612	52.1481	835.133	93.0699	3.1651	5.69e-07	2.13e-05	LOC103399816	NC_024308.1	12259161	12261637	-	1592	protein_coding	regulator of G-protein signaling 2 && sp|Q3S853|RGS2_PIG Regulator of G-protein signaling 2 OS=Sus scrofa OX=9823 GN=RGS2 PE=2 SV=2 && -	-
103389681	2641.05	2951.67	2359.2	7342.81	6429.85	4990.18	2650.64	6254.28	-1.23852	5.74e-07	2.14e-05	LOC103389681	NC_024320.1	13102909	13110340	-	3395	protein_coding	chloride intracellular channel protein 5-like%2C transcript variant X2 && sp|Q8BXK9|CLIC5_MOUSE Chloride intracellular channel protein 5 OS=Mus musculus OX=10090 GN=Clic5 PE=1 SV=1 && PF13417:Glutathione S-transferase, N-terminal domain|PF13410:Glutathione S-transferase, C-terminal domain	-
103377661	188.458	253.722	131.17	707.904	1156.48	499.419	191.117	787.934	-2.04386	5.78e-07	2.15e-05	gdpd5	NC_024310.1	2172341	2200120	+	4226	protein_coding	glycerophosphodiester phosphodiesterase domain containing 5%2C transcript variant X3 && sp|Q3KTM2|GDPD5_CHICK Glycerophosphodiester phosphodiesterase domain-containing protein 5 OS=Gallus gallus OX=9031 GN=GDPD5 PE=1 SV=1 && PF03009:Glycerophosphoryl diester phosphodiesterase family	-
112487293	27.1731	25.2712	17.6754	0	0	0	23.3732	0	6.90352	5.79e-07	2.15e-05	LOC112487293	NC_024314.1	13457065	13462175	+	2313	lncRNA	uncharacterized LOC112487293 && sp|Q8IVV7|GID4_HUMAN Glucose-induced degradation protein 4 homolog OS=Homo sapiens OX=9606 GN=GID4 PE=1 SV=1 && -	-
103382984	513.659	750.048	920.049	1536.75	4799.79	12519.6	727.919	6285.37	-3.11021	6.07e-07	2.25e-05	LOC103382984	NC_024314.1	28949003	28955702	-	2959	protein_coding	chloride anion exchanger-like && sp|Q9WVC8|S26A3_MOUSE Chloride anion exchanger OS=Mus musculus OX=10090 GN=Slc26a3 PE=1 SV=1 && PF01740:STAS domain|PF00916:Sulfate permease family	-
103395904	197.224	23.2495	22.3268	1.04257	3.43169	1.00285	80.9334	1.8257	5.49594	6.13e-07	2.27e-05	LOC103395904	NC_024326.1	1370843	1388231	+	5012	protein_coding	rap guanine nucleotide exchange factor 4-like%2C transcript variant X2 && sp|Q8WZA2|RPGF4_HUMAN Rap guanine nucleotide exchange factor 4 OS=Homo sapiens OX=9606 GN=RAPGEF4 PE=1 SV=1 && PF00027:Cyclic nucleotide-binding domain|PF00617:RasGEF domain|PF00618:RasGEF N-terminal motif|PF00610:Domain found in Dishevelled, Egl-10, and Pleckstrin (DEP)	-
103382426	1560.26	2954.7	2453.15	14134.1	7956.95	5984	2322.71	9358.35	-2.01052	6.26e-07	2.31e-05	aldh1l2	NC_024314.1	15436594	15450995	-	5416	protein_coding	aldehyde dehydrogenase 1 family member L2 && sp|Q3SY69|AL1L2_HUMAN Mitochondrial 10-formyltetrahydrofolate dehydrogenase OS=Homo sapiens OX=9606 GN=ALDH1L2 PE=1 SV=2 && PF02911:Formyl transferase, C-terminal domain|PF00171:Aldehyde dehydrogenase family|PF00551:Formyl transferase	-
103392812	491.745	784.417	263.27	2137.27	3088.52	1705.85	513.144	2310.54	-2.17103	6.48e-07	2.39e-05	cldn34	NC_024308.1	19219	21254	+	1583	protein_coding	claudin 34 && sp|H7C241|CLD34_HUMAN Claudin-34 OS=Homo sapiens OX=9606 GN=CLDN34 PE=3 SV=2 && PF13903:PMP-22/EMP/MP20/Claudin tight junction	-
103388569	7154.41	4159.63	2638.28	1107.21	1402.42	773.196	4650.77	1094.27	2.08766	6.49e-07	2.39e-05	steap4	NC_024319.1	11035037	11041545	+	2510	protein_coding	STEAP4 metalloreductase && sp|Q687X5|STEA4_HUMAN Metalloreductase STEAP4 OS=Homo sapiens OX=9606 GN=STEAP4 PE=1 SV=1 && PF03807:NADP oxidoreductase coenzyme F420-dependent|PF01794:Ferric reductase like transmembrane component	-
103386672	2080.93	1822.56	2189.88	1001.91	910.542	683.943	2031.12	865.465	1.23095	6.5e-07	2.39e-05	pdhb	NC_024317.1	17749546	17757432	+	2698	protein_coding	pyruvate dehydrogenase E1 beta subunit%2C transcript variant X2 && sp|P49432|ODPB_RAT Pyruvate dehydrogenase E1 component subunit beta, mitochondrial OS=Rattus norvegicus OX=10116 GN=Pdhb PE=1 SV=2 && PF02780:Transketolase, C-terminal domain|PF02779:Transketolase, pyrimidine binding domain	-
103393497	670.562	73.7918	334.902	47.9582	14.8707	29.0826	359.752	30.6371	3.55203	6.51e-07	2.39e-05	LOC103393497	NC_024308.1	1862492	1865803	-	2025	protein_coding	sphingosine 1-phosphate receptor 4%2C transcript variant X1 && sp|Q9Z0L1|S1PR4_MOUSE Sphingosine 1-phosphate receptor 4 OS=Mus musculus OX=10090 GN=S1pr4 PE=2 SV=1 && PF00001:7 transmembrane receptor (rhodopsin family)	-
103395883	795.908	1436.41	1136.81	2565.76	3910.99	3606.24	1123.04	3361	-1.58167	6.72e-07	2.46e-05	LOC103395883	NC_024326.1	570046	572435	-	774	protein_coding	gamma-interferon-inducible lysosomal thiol reductase-like && sp|Q5XJN2|GILT_DANRE Gamma-interferon-inducible lysosomal thiol reductase OS=Danio rerio OX=7955 GN=ifi30 PE=1 SV=1 && PF03227:Gamma interferon inducible lysosomal thiol reductase (GILT)	-
103376936	1066.76	2040.9	555.379	7738.99	8511.74	4006.38	1221.01	6752.37	-2.46743	6.73e-07	2.46e-05	pck2	NC_024309.1	4077903	4084953	-	3447	protein_coding	phosphoenolpyruvate carboxykinase 2%2C mitochondrial && sp|Q16822|PCKGM_HUMAN Phosphoenolpyruvate carboxykinase [GTP], mitochondrial OS=Homo sapiens OX=9606 GN=PCK2 PE=1 SV=4 && PF17297:Phosphoenolpyruvate carboxykinase N-terminal domain|PF00821:Phosphoenolpyruvate carboxykinase C-terminal P-loop domain	-
103388457	480.35	345.71	352.577	1315.72	822.462	1092.1	392.879	1076.76	-1.4543	6.82e-07	2.49e-05	tent5b	NC_024319.1	9777736	9783550	+	2621	protein_coding	terminal nucleotidyltransferase 5B && sp|Q96IP4|TET5A_HUMAN Terminal nucleotidyltransferase 5A OS=Homo sapiens OX=9606 GN=TENT5A PE=1 SV=2 && PF07984:Nucleotidyltransferase	-
103386200	28.9262	9.09762	60.4684	0	0	0	32.8307	0	7.39482	6.84e-07	2.49e-05	LOC103386200	NC_024317.1	8232727	8237666	-	1769	protein_coding	solute carrier family 2%2C facilitated glucose transporter member 9-like%2C transcript variant X3 && sp|Q9NRM0|GTR9_HUMAN Solute carrier family 2, facilitated glucose transporter member 9 OS=Homo sapiens OX=9606 GN=SLC2A9 PE=1 SV=2 && PF00083:Sugar (and other) transporter	-
103388677	75.3834	25.2712	44.6536	3.12771	5.71949	3.00855	48.436	3.95191	3.63103	6.95e-07	2.52e-05	LOC103388677	NC_024319.1	13531134	13536689	-	3007	protein_coding	riboflavin transporter 2-like%2C transcript variant X2 && sp|B5X4H8|RFT2_SALSA Riboflavin transporter 2 OS=Salmo salar OX=8030 GN=rft2 PE=2 SV=1 && PF06237:Protein of unknown function (DUF1011)	-
103399023	543.462	21.2278	117.216	8.34055	14.8707	6.01709	227.302	9.74277	4.54981	7.27e-07	2.63e-05	LOC103399023	NW_007585320.1	55	4072	+	1648	lncRNA	uncharacterized LOC103399023%2C transcript variant X2 && - && -	-
103389209	348.867	61.6616	119.076	14.596	26.3096	9.02564	176.535	16.6437	3.41381	7.33e-07	2.65e-05	LOC103389209	NC_024320.1	4003162	4006582	+	1580	protein_coding	alpha-(1%2C3)-fucosyltransferase 7-like && sp|Q712G6|FUT7_RAT Alpha-(1,3)-fucosyltransferase 7 OS=Rattus norvegicus OX=10116 GN=Fut7 PE=1 SV=1 && PF00852:Glycosyltransferase family 10 (fucosyltransferase) C-term|PF17039:Fucosyltransferase, N-terminal	-
103387578	423.374	1115.97	149.775	4084.78	5724.06	3570.14	563.041	4459.66	-2.98591	7.37e-07	2.66e-05	LOC103387578	NC_024318.1	12776561	12778710	-	1129	protein_coding	group XIIB secretory phospholipase A2-like protein%2C transcript variant X1 && sp|Q9BX93|PG12B_HUMAN Group XIIB secretory phospholipase A2-like protein OS=Homo sapiens OX=9606 GN=PLA2G12B PE=1 SV=2 && PF06951:Group XII secretory phospholipase A2 precursor (PLA2G12)	-
103385870	79.7662	55.5966	474.444	18.7662	3.43169	2.0057	203.269	8.06787	4.65284	7.45e-07	2.68e-05	LOC103385870	NC_024307.1	23106697	23116416	-	4423	protein_coding	leukotriene B4 receptor 1-like%2C transcript variant X3 && sp|Q9R0Q2|LT4R1_RAT Leukotriene B4 receptor 1 OS=Rattus norvegicus OX=10116 GN=Ltb4r PE=1 SV=1 && -	-
103379018	35.062	38.4122	143.263	7.29798	4.57559	2.0057	72.2459	4.62642	3.96915	7.63e-07	2.74e-05	LOC103379018	NC_024311.1	10279015	10281916	+	1414	protein_coding	G2/mitotic-specific cyclin-B2-like && sp|Q9IBG0|CCNB2_ORYLA G2/mitotic-specific cyclin-B2 OS=Oryzias latipes OX=8090 GN=ccnb2 PE=2 SV=1 && PF00134:Cyclin, N-terminal domain|PF02984:Cyclin, C-terminal domain	-
103387121	1109.71	1268.61	1725.67	503.561	560.51	335.954	1368	466.675	1.55201	7.71e-07	2.77e-05	lrpprc	NC_024318.1	5356599	5396008	+	4584	protein_coding	leucine rich pentatricopeptide repeat containing && sp|Q28C74|LPPRC_XENTR Leucine-rich PPR motif-containing protein, mitochondrial OS=Xenopus tropicalis OX=8364 GN=lrpprc PE=2 SV=1 && PF17177:Pentacotripeptide-repeat region of PRORP|PF13812:Pentatricopeptide repeat domain	-
103377071	1083.42	211.267	271.642	64.6393	73.2094	23.0655	522.109	53.6381	3.28496	7.92e-07	2.83e-05	LOC103377071	NC_024309.1	7161200	7167295	-	1920	protein_coding	neutrophil cytosol factor 2-like && sp|O70145|NCF2_MOUSE Neutrophil cytosol factor 2 OS=Mus musculus OX=10090 GN=Ncf2 PE=1 SV=1 && PF14604:Variant SH3 domain|PF00018:SH3 domain	-
103380315	326.954	464.989	228.849	1100.95	1897.73	938.666	340.264	1312.45	-1.94774	7.97e-07	2.85e-05	LOC103380315	NC_024312.1	13586572	13598069	-	4310	protein_coding	3-oxo-5-beta-steroid 4-dehydrogenase-like%2C transcript variant X1 && sp|P31646|S6A13_RAT Sodium- and chloride-dependent GABA transporter 2 OS=Rattus norvegicus OX=10116 GN=Slc6a13 PE=1 SV=1 && PF00248:Aldo/keto reductase family|PF00209:Sodium:neurotransmitter symporter family	-
103377136	604.82	568.096	723.76	1227.1	1371.53	1375.91	632.225	1324.85	-1.06716	8.09e-07	2.88e-05	abhd10	NC_024309.1	9202391	9205562	+	1344	protein_coding	abhydrolase domain containing 10 && sp|Q5E9H9|ABHDA_BOVIN Palmitoyl-protein thioesterase ABHD10, mitochondrial OS=Bos taurus OX=9913 GN=ABHD10 PE=2 SV=1 && PF00561:alpha/beta hydrolase fold	-
103379744	1016.8	1592.08	1326.58	3155.86	4378.84	3012.56	1311.82	3515.75	-1.42237	8.1e-07	2.88e-05	LOC103379744	NC_024312.1	4847481	4850516	+	1529	protein_coding	aldose reductase-related protein 2-like && sp|P07943|ALDR_RAT Aldo-keto reductase family 1 member B1 OS=Rattus norvegicus OX=10116 GN=Akr1b1 PE=1 SV=3 && PF00248:Aldo/keto reductase family	-
103394129	205.99	196.104	189.778	388.878	499.883	432.228	197.29	440.33	-1.15768	8.22e-07	2.92e-05	ccdc126	NC_024324.1	4880937	4885356	-	3698	protein_coding	coiled-coil domain containing 126%2C transcript variant X10 && sp|Q96EE4|CC126_HUMAN Coiled-coil domain-containing protein 126 OS=Homo sapiens OX=9606 GN=CCDC126 PE=2 SV=2 && PF15027:Domain of unknown function (DUF4525)	-
103394991	5333.81	2989.07	7964.15	1222.93	1761.6	1276.63	5429.01	1420.39	1.93452	8.24e-07	2.92e-05	nccrp1	NC_024325.1	5934612	5937595	+	976	protein_coding	non-specific cytotoxic cell receptor protein 1 homolog (zebrafish) && sp|Q568V3|FBX50_DANRE F-box only protein 50 OS=Danio rerio OX=7955 GN=nccrp1 PE=2 SV=2 && PF04300:F-box associated region	-
103391830	206.866	196.104	201.871	72.9798	92.6557	75.2137	201.614	80.2831	1.3305	8.27e-07	2.92e-05	LOC103391830	NC_024322.1	5936574	5971961	+	6732	protein_coding	UDP-glucose_glycoprotein glucosyltransferase 2%2C transcript variant X1 && sp|Q9NYU1|UGGG2_HUMAN UDP-glucose:glycoprotein glucosyltransferase 2 OS=Homo sapiens OX=9606 GN=UGGT2 PE=1 SV=4 && -	-
103390351	261.212	200.148	377.695	66.7244	83.5045	97.2763	279.685	82.5017	1.76133	8.29e-07	2.92e-05	ufc1	NC_024320.1	26989914	26990797	-	884	protein_coding	ubiquitin-fold modifier conjugating enzyme 1 && sp|B9EM04|UFC1_SALSA Ubiquitin-fold modifier-conjugating enzyme 1 OS=Salmo salar OX=8030 GN=ufc1 PE=2 SV=1 && PF08694:Ubiquitin-fold modifier-conjugating enzyme 1	-
103378915	1372.68	1154.39	2135	492.092	558.222	581.652	1554.02	543.989	1.51442	8.33e-07	2.93e-05	LOC103378915	NC_024311.1	7956973	7960499	+	1601	protein_coding	isocitrate dehydrogenase [NAD] subunit alpha%2C mitochondrial && sp|Q9D6R2|IDH3A_MOUSE Isocitrate dehydrogenase [NAD] subunit alpha, mitochondrial OS=Mus musculus OX=10090 GN=Idh3a PE=1 SV=1 && PF00180:Isocitrate/isopropylmalate dehydrogenase	-
103378070	627.611	448.816	519.098	1130.14	1171.35	1198.4	531.841	1166.63	-1.13277	8.35e-07	2.93e-05	LOC103378070	NC_024310.1	11036747	11044082	-	2763	protein_coding	RILP-like protein 1 && sp|Q17QG3|RIPL1_BOVIN RILP-like protein 1 OS=Bos taurus OX=9913 GN=RILPL1 PE=2 SV=1 && PF11461:Rab interacting lysosomal protein|PF09744:JNK_SAPK-associated protein-1	-
103386205	592.549	384.122	595.381	139.704	216.197	114.325	524.017	156.742	1.74315	8.35e-07	2.93e-05	manf	NC_024317.1	8273974	8287717	-	2200	protein_coding	mesencephalic astrocyte derived neurotrophic factor && sp|P80513|MANF_BOVIN Mesencephalic astrocyte-derived neurotrophic factor OS=Bos taurus OX=9913 GN=MANF PE=1 SV=2 && PF10208:Degradation arginine-rich protein for mis-folding	-
103392714	383.929	439.718	677.246	139.704	157.858	65.1852	500.298	120.916	2.05029	8.37e-07	2.93e-05	mrpl12	NC_024323.1	3572532	3575524	+	1308	protein_coding	mitochondrial ribosomal protein L12 && sp|Q9DB15|RM12_MOUSE 39S ribosomal protein L12, mitochondrial OS=Mus musculus OX=10090 GN=Mrpl12 PE=1 SV=2 && PF16320:Ribosomal protein L7/L12 dimerisation domain|PF00542:Ribosomal protein L7/L12 C-terminal domain	-
103387460	340.102	679.289	646.546	1621.19	2234.03	1567.45	555.312	1807.56	-1.70297	8.47e-07	2.96e-05	ret	NC_024318.1	10732248	10754413	-	4606	protein_coding	ret proto-oncogene%2C transcript variant X1 && sp|P07949|RET_HUMAN Proto-oncogene tyrosine-protein kinase receptor Ret OS=Homo sapiens OX=9606 GN=RET PE=1 SV=3 && PF17813:RET Cadherin like domain 4|PF17756:RET Cadherin like domain 1|PF17812:RET Cadherin like domain 3|PF07714:Protein tyrosine kinase	-
103391405	458.436	133.432	168.381	50.0433	29.7413	13.037	253.416	30.9406	3.03557	8.76e-07	3.06e-05	adam19	NC_024321.1	19007852	19025268	-	4425	protein_coding	ADAM metallopeptidase domain 19 && sp|Q9H013|ADA19_HUMAN Disintegrin and metalloproteinase domain-containing protein 19 OS=Homo sapiens OX=9606 GN=ADAM19 PE=1 SV=3 && PF08516:ADAM cysteine-rich|PF01421:Reprolysin (M12B) family zinc metalloprotease|PF00200:Disintegrin|PF01562:Reprolysin family propeptide	-
103381175	2576.18	1473.81	2652.24	716.245	875.082	540.535	2234.08	710.621	1.65289	8.82e-07	3.07e-05	abracl	NC_024313.1	11247926	11251967	+	3169	protein_coding	ABRA C-terminal like && sp|Q4KML4|ABRAL_MOUSE Costars family protein ABRACL OS=Mus musculus OX=10090 GN=Abracl PE=1 SV=1 && -	-
103389770	103.433	132.421	149.775	378.452	434.681	280.798	128.543	364.644	-1.50436	8.9e-07	3.09e-05	ptger2	NC_024320.1	15686509	15695907	-	1468	protein_coding	prostaglandin E receptor 2 && sp|Q62928|PE2R2_RAT Prostaglandin E2 receptor EP2 subtype OS=Rattus norvegicus OX=10116 GN=Ptger2 PE=2 SV=1 && PF00001:7 transmembrane receptor (rhodopsin family)	-
103379525	222.644	222.386	195.359	524.412	411.803	497.413	213.463	477.876	-1.1631	8.99e-07	3.12e-05	LOC103379525	NC_024312.1	1411117	1439708	-	7077	protein_coding	capping protein%2C Arp2/3 and myosin-I linker protein 3 && sp|Q8ND23|CARL3_HUMAN Capping protein, Arp2/3 and myosin-I linker protein 3 OS=Homo sapiens OX=9606 GN=CARMIL3 PE=2 SV=2 && PF17888:Carmil pleckstrin homology domain|PF16000:CARMIL C-terminus	-
103385055	63.1117	231.484	39.0719	1202.08	2191.71	398.131	111.222	1263.97	-3.50763	9.02e-07	3.12e-05	slc2a5	NC_024316.1	12299430	12304920	-	2137	protein_coding	solute carrier family 2 member 5%2C transcript variant X1 && sp|Q5RET7|GTR5_PONAB Solute carrier family 2, facilitated glucose transporter member 5 OS=Pongo abelii OX=9601 GN=SLC2A5 PE=2 SV=1 && PF00083:Sugar (and other) transporter	-
103381518	53.4696	44.4772	71.6317	12.5108	5.71949	9.02564	56.5262	9.08532	2.63065	9.07e-07	3.13e-05	LOC103381518	NC_024314.1	1354828	1360852	-	3083	protein_coding	uncharacterized LOC103381518 && sp|Q8NFT6|DBF4B_HUMAN Protein DBF4 homolog B OS=Homo sapiens OX=9606 GN=DBF4B PE=1 SV=1 && PF07535:DBF zinc finger	-
103383328	410.226	606.508	376.764	1334.49	3749.7	1451.12	464.499	2178.44	-2.22963	9.24e-07	3.19e-05	ucp1	NC_024315.1	2098764	2102326	-	1599	protein_coding	uncoupling protein 1%2C transcript variant X2 && sp|Q9W725|UCP2_CYPCA Mitochondrial uncoupling protein 2 OS=Cyprinus carpio OX=7962 GN=ucp2 PE=2 SV=1 && PF00153:Mitochondrial carrier protein	-
103382248	70430	23550.7	30851	4805.2	11686.1	4059.53	41610.6	6850.26	2.60275	9.33e-07	3.21e-05	lect2	NC_024314.1	14436974	14437984	-	693	protein_coding	leukocyte cell derived chemotaxin 2 && sp|O88803|LECT2_MOUSE Leukocyte cell-derived chemotaxin-2 OS=Mus musculus OX=10090 GN=Lect2 PE=1 SV=1 && -	-
103393231	115.705	232.495	178.614	422.24	750.397	1037.95	175.605	736.862	-2.07007	9.39e-07	3.22e-05	ciita	NC_024323.1	11648054	11659307	-	5253	protein_coding	class II major histocompatibility complex transactivator%2C transcript variant X1 && sp|P33076|C2TA_HUMAN MHC class II transactivator OS=Homo sapiens OX=9606 GN=CIITA PE=1 SV=3 && PF05729:NACHT domain	-
103389608	76.26	138.486	10.2331	3.12771	0	0	74.993	1.04257	6.15223	9.43e-07	3.23e-05	LOC103389608	NC_024307.1	28732772	28739310	+	2345	protein_coding	fibrinogen alpha chain-like && sp|P14448|FIBA_CHICK Fibrinogen alpha chain OS=Gallus gallus OX=9031 GN=FGA PE=1 SV=4 && PF00147:Fibrinogen beta and gamma chains, C-terminal globular domain	-
103386858	77.1365	41.4447	36.281	223.11	159.002	216.615	51.6207	199.576	-1.94816	9.43e-07	3.23e-05	LOC103386858	NC_024318.1	43137	51924	-	5229	protein_coding	monocarboxylate transporter 12-B-like%2C transcript variant X2 && sp|Q503M4|MT12B_DANRE Monocarboxylate transporter 12-B OS=Danio rerio OX=7955 GN=slc16a12b PE=2 SV=1 && PF07690:Major Facilitator Superfamily	-
103392814	319.941	1010.85	220.477	78.1926	43.4681	10.0285	517.088	43.8964	3.55882	9.49e-07	3.24e-05	LOC103392814	NC_024323.1	4993105	4995122	-	847	protein_coding	metalloproteinase inhibitor 2-like && sp|Q9WUC6|TIMP2_CAVPO Metalloproteinase inhibitor 2 OS=Cavia porcellus OX=10141 GN=TIMP2 PE=2 SV=1 && PF00965:Tissue inhibitor of metalloproteinase	-
103394007	208.619	117.258	249.316	27.1068	38.8925	59.1681	191.731	41.7225	2.19911	1e-06	3.42e-05	clspn	NC_024324.1	2948802	2958239	-	4849	protein_coding	claspin && sp|Q9DF50|CLSPN_XENLA Claspin OS=Xenopus laevis OX=8355 GN=clspn PE=1 SV=2 && -	-
103386667	262.965	247.657	272.573	533.795	608.553	850.416	261.065	664.255	-1.34744	1.01e-06	3.45e-05	LOC103386667	NC_024307.1	24001815	24007126	+	2859	protein_coding	monocarboxylate transporter 13-like%2C transcript variant X2 && sp|Q8CE94|MOT13_MOUSE Monocarboxylate transporter 13 OS=Mus musculus OX=10090 GN=Slc16a13 PE=2 SV=1 && PF07690:Major Facilitator Superfamily	-
103388565	655.66	628.747	789.81	290.877	351.177	277.789	691.406	306.614	1.17386	1.02e-06	3.46e-05	tbrg4	NC_024319.1	10989806	10996470	+	2350	protein_coding	transforming growth factor beta regulator 4 && sp|Q7YS91|FAKD4_PIG FAST kinase domain-containing protein 4 OS=Sus scrofa OX=9823 GN=TBRG4 PE=2 SV=2 && PF08373:RAP domain|PF06743:FAST kinase-like protein, subdomain 1|PF08368:FAST kinase-like protein, subdomain 2	-
103387874	3364.2	754.091	1654.04	336.75	303.133	419.191	1924.11	353.024	2.44631	1.02e-06	3.46e-05	LOC103387874	NC_024319.1	552395	554663	-	821	protein_coding	cornifelin homolog && - && PF04749:PLAC8 family	-
103379553	313.805	333.579	525.61	83.4055	121.253	145.413	390.998	116.691	1.74423	1.02e-06	3.46e-05	nup93	NC_024312.1	2008687	2030157	+	2793	protein_coding	nucleoporin 93%2C transcript variant X2 && sp|Q7ZU29|NUP93_DANRE Nuclear pore complex protein Nup93 OS=Danio rerio OX=7955 GN=dye PE=2 SV=1 && PF04097:Nup93/Nic96	-
103386164	335.719	219.354	381.416	104.257	100.663	115.328	312.163	106.749	1.54817	1.04e-06	3.51e-05	chchd4	NC_024317.1	7564208	7566770	+	1755	protein_coding	coiled-coil-helix-coiled-coil-helix domain containing 4 && sp|Q6DEI8|MIA40_DANRE Mitochondrial intermembrane space import and assembly protein 40 OS=Danio rerio OX=7955 GN=chchd4 PE=2 SV=1 && PF06747:CHCH domain	-
103388443	427.757	438.707	345.135	964.376	872.794	797.265	403.866	878.145	-1.12065	1.04e-06	3.51e-05	nelfa	NC_024307.1	26841823	26846886	-	2238	protein_coding	negative elongation factor complex member A && sp|Q9H3P2|NELFA_HUMAN Negative elongation factor A OS=Homo sapiens OX=9606 GN=NELFA PE=1 SV=3 && -	-
103394825	98.1737	204.191	670.734	29.1919	34.3169	45.1282	324.366	36.2123	3.16239	1.04e-06	3.51e-05	ckap2	NC_024325.1	2156175	2159505	+	2102	protein_coding	cytoskeleton associated protein 2 && sp|A5D7U0|CKAP2_BOVIN Cytoskeleton-associated protein 2 OS=Bos taurus OX=9913 GN=CKAP2 PE=2 SV=1 && PF15297:Cytoskeleton-associated protein 2 C-terminus	-
103391477	1618.99	2209.71	1366.58	4197.38	4103.16	6039.16	1731.76	4779.9	-1.46489	1.06e-06	3.58e-05	LOC103391477	NC_024321.1	19801036	19810308	-	2446	protein_coding	alpha-1%2C3-mannosyl-glycoprotein 4-beta-N-acetylglucosaminyltransferase A%2C transcript variant X3 && sp|Q6GMK0|MGT4B_DANRE Alpha-1,3-mannosyl-glycoprotein 4-beta-N-acetylglucosaminyltransferase B OS=Danio rerio OX=7955 GN=mgat4b PE=2 SV=1 && PF04666:N-Acetylglucosaminyltransferase-IV (GnT-IV) conserved region	-
103394503	748.575	492.282	707.945	182.449	288.262	215.612	649.601	228.775	1.50678	1.08e-06	3.62e-05	asns	NC_024324.1	11907700	11916630	-	2686	protein_coding	asparagine synthetase (glutamine-hydrolyzing) && sp|Q5ZJU3|ASNS_CHICK Asparagine synthetase [glutamine-hydrolyzing] OS=Gallus gallus OX=9031 GN=ASNS PE=2 SV=3 && PF00733:Asparagine synthase|PF13537:Glutamine amidotransferase domain	-
103396054	26.2965	35.3796	34.4204	140.747	113.246	87.2478	32.0322	113.747	-1.83026	1.09e-06	3.64e-05	tnr	NC_024326.1	3703488	3822119	-	5176	protein_coding	tenascin R && sp|Q8BYI9|TENR_MOUSE Tenascin-R OS=Mus musculus OX=10090 GN=Tnr PE=1 SV=2 && PF18720:Tenascin EGF domain|PF00041:Fibronectin type III domain|PF00147:Fibrinogen beta and gamma chains, C-terminal globular domain	-
103382670	48.2103	29.3145	129.309	3.12771	1.1439	8.02279	68.9447	4.09813	4.05245	1.1e-06	3.69e-05	depdc4	NC_024314.1	19212266	19217418	+	3082	protein_coding	DEP domain containing 4 && sp|Q1JQ19|DEPD7_DANRE DEP domain-containing protein 7 OS=Danio rerio OX=7955 GN=depdc7 PE=2 SV=1 && PF00610:Domain found in Dishevelled, Egl-10, and Pleckstrin (DEP)	-
103381124	144.631	85.922	207.453	9.38312	13.7268	37.1054	146.002	20.0718	2.85746	1.19e-06	3.97e-05	esco2	NC_024313.1	10479349	10484554	-	2760	protein_coding	establishment of sister chromatid cohesion N-acetyltransferase 2%2C transcript variant X4 && sp|Q5SPR8|ESCO2_DANRE N-acetyltransferase ESCO2 OS=Danio rerio OX=7955 GN=esco2 PE=2 SV=1 && PF13878:zinc-finger of acetyl-transferase ESCO|PF13880:ESCO1/2 acetyl-transferase	-
103377394	1173.7	852.144	1163.78	470.198	502.171	447.271	1063.21	473.213	1.1683	1.2e-06	3.99e-05	cdv3	NC_024309.1	12689691	12693654	-	2374	protein_coding	CDV3 homolog%2C transcript variant X1 && sp|Q7T370|CDV3_DANRE Protein CDV3 homolog OS=Danio rerio OX=7955 GN=cdv3 PE=2 SV=1 && PF15359:Carnitine deficiency-associated protein 3	-
103377186	737.18	867.306	659.57	1527.36	1528.25	1587.51	754.685	1547.71	-1.03646	1.22e-06	4.05e-05	LOC103377186	NC_024309.1	9879948	9888222	-	6301	protein_coding	polyhomeotic-like protein 3%2C transcript variant X2 && sp|Q8CHP6|PHC3_MOUSE Polyhomeotic-like protein 3 OS=Mus musculus OX=10090 GN=Phc3 PE=1 SV=2 && -	-
103388347	1839	2207.69	1301.47	4147.34	5496.43	4395.49	1782.72	4679.75	-1.3924	1.23e-06	4.07e-05	LOC103388347	NC_024307.1	26872839	26885562	-	3351	protein_coding	large neutral amino acids transporter small subunit 2-like && sp|Q9WVR6|LAT2_RAT Large neutral amino acids transporter small subunit 2 OS=Rattus norvegicus OX=10116 GN=Slc7a8 PE=1 SV=1 && PF13520:Amino acid permease	-
107990047	43.8276	45.4881	32.5599	126.151	110.958	181.516	40.6252	139.541	-1.78209	1.25e-06	4.13e-05	LOC107990047	NC_024325.1	13400254	13403727	-	1076	protein_coding	uncharacterized LOC107990047 && - && -	-
103391831	456.683	350.764	452.117	39.6176	138.412	100.285	419.855	92.7714	2.17988	1.26e-06	4.16e-05	dnajc3	NC_024322.1	5971664	5980141	-	2015	protein_coding	DnaJ heat shock protein family (Hsp40) member C3 && sp|Q27968|DNJC3_BOVIN DnaJ homolog subfamily C member 3 OS=Bos taurus OX=9913 GN=DNAJC3 PE=1 SV=1 && PF00226:DnaJ domain|PF14559:Tetratricopeptide repeat	-
103382150	167.421	99.063	219.547	30.2345	50.3315	32.0912	162.01	37.5524	2.11334	1.29e-06	4.25e-05	phf5a	NC_024314.1	12328504	12329635	-	541	protein_coding	PHD finger protein 5A && sp|Q7RTV0|PHF5A_HUMAN PHD finger-like domain-containing protein 5A OS=Homo sapiens OX=9606 GN=PHF5A PE=1 SV=1 && PF03660:PHF5-like protein	-
103386271	237.545	209.245	300.481	66.7244	92.6557	100.285	249.091	86.555	1.52533	1.31e-06	4.32e-05	hdac8	NC_024307.1	23618392	23628966	+	2079	protein_coding	histone deacetylase 8 && sp|Q7SXM0|HDAC8_DANRE Histone deacetylase 8 OS=Danio rerio OX=7955 GN=hdac8 PE=2 SV=1 && PF00850:Histone deacetylase domain	-
103395506	41.1979	28.3037	133.03	2.08514	5.71949	6.01709	67.5107	4.60724	3.87574	1.32e-06	4.33e-05	haus1	NC_024325.1	14655007	14657312	+	1010	protein_coding	HAUS augmin like complex subunit 1 && sp|Q96CS2|HAUS1_HUMAN HAUS augmin-like complex subunit 1 OS=Homo sapiens OX=9606 GN=HAUS1 PE=1 SV=1 && -	-
103378095	1080.79	1016.91	1534.04	554.646	408.371	462.313	1210.58	475.11	1.34918	1.37e-06	4.48e-05	slc1a5	NC_024310.1	11511730	11520535	+	3900	protein_coding	solute carrier family 1 member 5%2C transcript variant X1 && sp|Q95JC7|AAAT_BOVIN Neutral amino acid transporter B(0) OS=Bos taurus OX=9913 GN=SLC1A5 PE=2 SV=1 && PF00375:Sodium:dicarboxylate symporter family	-
103393654	212.125	601.454	576.775	52.1284	114.39	105.299	463.451	90.6058	2.35501	1.4e-06	4.59e-05	LOC103393654	NC_024323.1	16124891	16137844	+	4381	protein_coding	uncharacterized LOC103393654%2C transcript variant X1 && sp|Q5FW38|NFIL3_XENTR Nuclear factor interleukin-3-regulated protein OS=Xenopus tropicalis OX=8364 GN=nfil3 PE=2 SV=1 && -	TF_bZIP
103389437	49.0869	100.074	64.1895	261.685	233.355	206.587	71.1167	233.876	-1.72086	1.41e-06	4.6e-05	LOC103389437	NC_024320.1	8334278	8341406	-	7129	protein_coding	fidgetin-like && sp|Q503S1|FIGN_DANRE Fidgetin OS=Danio rerio OX=7955 GN=fign PE=2 SV=1 && PF00004:ATPase family associated with various cellular activities (AAA)	-
103393837	3590.35	4696.39	3621.59	7618.05	12094.4	9957.29	3969.45	9889.92	-1.31705	1.43e-06	4.65e-05	LOC103393837	NC_024324.1	783560	805942	+	944	protein_coding	proteasome subunit beta type-9%2C transcript variant X1 && sp|Q8UW64|PSB9_ORYLA Proteasome subunit beta type-9 OS=Oryzias latipes OX=8090 GN=psmb9 PE=3 SV=1 && PF00227:Proteasome subunit	-
103393647	665.302	221.375	482.817	3754.29	1174.78	2695.66	456.498	2541.58	-2.47674	1.43e-06	4.65e-05	LOC103393647	NC_024323.1	16199496	16203763	-	2842	protein_coding	prostaglandin E2 receptor EP1 subtype-like%2C transcript variant X2 && sp|Q9BGL8|PE2R1_CANLF Prostaglandin E2 receptor EP1 subtype OS=Canis lupus familiaris OX=9615 GN=PTGER1 PE=3 SV=1 && PF00001:7 transmembrane receptor (rhodopsin family)	-
103386782	880.934	1053.3	163.73	8690.85	5832.73	2775.89	699.322	5766.49	-3.04372	1.43e-06	4.66e-05	pck1	NC_024317.1	19799185	19804180	-	3055	protein_coding	phosphoenolpyruvate carboxykinase 1%2C transcript variant X1 && sp|P05153|PCKGC_CHICK Phosphoenolpyruvate carboxykinase, cytosolic [GTP] OS=Gallus gallus OX=9031 GN=PCK1 PE=2 SV=1 && PF00821:Phosphoenolpyruvate carboxykinase C-terminal P-loop domain|PF17297:Phosphoenolpyruvate carboxykinase N-terminal domain	-
103377814	3143.31	2510.94	3166.68	1129.1	1512.23	1367.89	2940.31	1336.41	1.13778	1.46e-06	4.72e-05	psmd2	NC_024310.1	6279958	6287715	+	3347	protein_coding	proteasome 26S subunit%2C non-ATPase 2 && sp|P56701|PSMD2_BOVIN 26S proteasome non-ATPase regulatory subunit 2 OS=Bos taurus OX=9913 GN=PSMD2 PE=1 SV=2 && PF17781:RPN1/RPN2 N-terminal domain|PF18051:26S proteasome non-ATPase regulatory subunit RPN1 C-terminal|PF01851:Proteasome/cyclosome repeat	-
103381763	769.612	481.163	367.462	1748.39	4784.92	1683.78	539.412	2739.03	-2.34395	1.46e-06	4.72e-05	LOC103381763	NC_024314.1	5862075	5870169	+	3249	protein_coding	cerebellar degeneration-related protein 2-like && sp|Q5ZJA3|CDR2_CHICK Cerebellar degeneration-related protein 2 OS=Gallus gallus OX=9031 GN=CDR2 PE=2 SV=1 && -	-
103377913	408.473	304.265	478.165	106.342	148.707	161.459	396.968	138.836	1.51603	1.48e-06	4.79e-05	sae1	NC_024310.1	7741455	7752433	+	1404	protein_coding	SUMO1 activating enzyme subunit 1 && sp|Q6IQS6|SAE1_DANRE SUMO-activating enzyme subunit 1 OS=Danio rerio OX=7955 GN=sae1 PE=2 SV=1 && PF00899:ThiF family	-
103387693	570.635	259.788	230.71	81.3203	74.3533	99.282	353.711	84.9852	2.05707	1.49e-06	4.79e-05	plek	NC_024318.1	15773835	15778569	+	1581	protein_coding	pleckstrin && sp|Q9JHK5|PLEK_MOUSE Pleckstrin OS=Mus musculus OX=10090 GN=Plek PE=1 SV=1 && PF00169:PH domain|PF00610:Domain found in Dishevelled, Egl-10, and Pleckstrin (DEP)	-
103398611	258.583	378.057	274.433	643.265	903.679	772.194	303.691	773.046	-1.34852	1.49e-06	4.79e-05	LOC103398611	NW_007585117.1	180127	200993	+	3162	protein_coding	LIM domain kinase 2-like && sp|P53666|LIMK2_CHICK LIM domain kinase 2 OS=Gallus gallus OX=9031 GN=LIMK2 PE=2 SV=1 && PF00412:LIM domain|PF07714:Protein tyrosine kinase|PF00595:PDZ domain	-
103391191	6343.6	5957.93	2883.88	36.4899	211.621	6.01709	5061.8	84.7093	5.90195	1.49e-06	4.8e-05	LOC103391191	NC_024321.1	15065993	15070844	+	3000	protein_coding	uncharacterized LOC103391191 && sp|P45831|TSAC_MYCLE Putative threonylcarbamoyl-AMP synthase OS=Mycobacterium leprae (strain TN) OX=272631 GN=ML1136 PE=3 SV=1 && PF01300:Telomere recombination|PF01184:GPR1/FUN34/yaaH family	-
103384908	398.831	353.796	693.991	123.023	168.153	151.43	482.206	147.535	1.70918	1.51e-06	4.85e-05	bcas2	NC_024316.1	8770529	8772629	+	1369	protein_coding	BCAS2%2C pre-mRNA processing factor && sp|Q5RKQ0|SPF27_DANRE Pre-mRNA-splicing factor SPF27 OS=Danio rerio OX=7955 GN=bcas2 PE=2 SV=1 && PF05700:Breast carcinoma amplified sequence 2 (BCAS2)	-
103397558	2662.09	1296.92	1866.15	316.941	720.655	476.353	1941.72	504.65	1.94444	1.52e-06	4.88e-05	LOC103397558	NC_024328.1	4780907	4784523	-	2052	protein_coding	stromal cell-derived factor 2-like protein 1 && sp|Q3T083|SDF2L_BOVIN Stromal cell-derived factor 2-like protein 1 OS=Bos taurus OX=9913 GN=SDF2L1 PE=2 SV=1 && PF02815:MIR domain	-
103396332	11.3952	16.1735	10.2331	149.087	45.7559	68.1937	12.6006	87.679	-2.80359	1.52e-06	4.88e-05	obscn	NC_024326.1	7554869	7599702	+	20296	protein_coding	obscurin%2C cytoskeletal calmodulin and titin-interacting RhoGEF%2C transcript variant X1 && sp|Q5VST9|OBSCN_HUMAN Obscurin OS=Homo sapiens OX=9606 GN=OBSCN PE=1 SV=3 && PF00621:RhoGEF domain|PF07679:Immunoglobulin I-set domain|PF00169:PH domain|PF00041:Fibronectin type III domain	-
103380040	41.1979	95.0196	60.4684	300.26	427.818	176.501	65.5619	301.526	-2.20334	1.54e-06	4.92e-05	LOC103380040	NC_024312.1	9051007	9057137	-	2196	protein_coding	wee1-like protein kinase 2%2C transcript variant X2 && sp|Q1LX51|WEE2_DANRE Wee1-like protein kinase 2 OS=Danio rerio OX=7955 GN=wee2 PE=2 SV=2 && PF00069:Protein kinase domain	-
103386628	14155.4	25456.1	10047	59384.7	66574.8	49422.4	16552.9	58460.6	-1.8204	1.57e-06	4.99e-05	LOC103386628	NC_024317.1	16833064	16842459	+	3046	protein_coding	cytosolic 10-formyltetrahydrofolate dehydrogenase-like && sp|Q63ZT8|AL1L1_XENTR Cytosolic 10-formyltetrahydrofolate dehydrogenase OS=Xenopus tropicalis OX=8364 GN=aldh1l1 PE=2 SV=1 && PF00551:Formyl transferase|PF02911:Formyl transferase, C-terminal domain|PF00171:Aldehyde dehydrogenase family	-
103386686	149.89	115.237	81.8649	301.302	327.155	371.054	115.664	333.17	-1.52555	1.57e-06	5e-05	prelid3b	NC_024317.1	17919507	17924545	-	2278	protein_coding	PRELI domain containing 3B && sp|Q9Y3B1|PLD3B_HUMAN PRELI domain containing protein 3B OS=Homo sapiens OX=9606 GN=PRELID3B PE=1 SV=2 && PF04707:PRELI-like family	-
103388999	215.632	211.267	386.067	57.3413	96.0874	71.2023	270.989	74.877	1.85748	1.64e-06	5.21e-05	mrpl17	NC_024319.1	21918805	21921782	+	1579	protein_coding	mitochondrial ribosomal protein L17 && sp|Q9D8P4|RM17_MOUSE 39S ribosomal protein L17, mitochondrial OS=Mus musculus OX=10090 GN=Mrpl17 PE=1 SV=1 && PF01196:Ribosomal protein L17	-
103393217	513.659	315.384	611.196	106.342	104.095	186.53	480.08	132.322	1.85828	1.64e-06	5.21e-05	LOC103393217	NC_024323.1	10569287	10573440	+	2166	protein_coding	uncharacterized LOC103393217 && sp|Q8BH64|EHD2_MOUSE EH domain-containing protein 2 OS=Mus musculus OX=10090 GN=Ehd2 PE=1 SV=1 && -	-
103398026	340.978	138.486	138.612	44.8304	30.8852	50.1424	206.025	41.9527	2.29468	1.65e-06	5.22e-05	LOC103398026	NC_024328.1	14633468	14645211	-	3911	protein_coding	SH2 domain-containing protein 3C%2C transcript variant X1 && sp|Q8N5H7|SH2D3_HUMAN SH2 domain-containing protein 3C OS=Homo sapiens OX=9606 GN=SH2D3C PE=1 SV=1 && PF00017:SH2 domain|PF00617:RasGEF domain	-
103391000	20805.8	41323.4	29877.9	72406.4	99936.6	97267.3	30669	89870.1	-1.55107	1.7e-06	5.37e-05	cd74	NC_024321.1	10739847	10744031	-	1748	protein_coding	CD74 molecule && - && PF09307:CLIP, MHC2 interacting|PF00086:Thyroglobulin type-1 repeat|PF08831:Class II MHC-associated invariant chain trimerisation domain	-
103394867	293.645	171.844	255.828	68.8095	78.9289	91.2592	240.439	79.6659	1.59408	1.71e-06	5.38e-05	cdkn2aipnl	NC_024325.1	3195695	3197205	-	834	protein_coding	CDKN2A interacting protein N-terminal like && sp|Q96HQ2|C2AIL_HUMAN CDKN2AIP N-terminal-like protein OS=Homo sapiens OX=9606 GN=CDKN2AIPNL PE=1 SV=1 && PF11952:XRN-Two Binding Domain, XTBD	-
103394307	234.039	200.148	217.686	397.219	1117.59	1331.78	217.291	948.863	-2.1264	1.71e-06	5.38e-05	LOC103394307	NC_024324.1	9342381	9345075	+	477	lncRNA	uncharacterized LOC103394307%2C transcript variant X1 && - && -	-
103381845	461.942	339.644	73.4923	1551.34	4522.97	1459.14	291.693	2511.15	-3.10567	1.73e-06	5.43e-05	g6pc	NC_024314.1	7959235	7961653	+	1552	protein_coding	glucose-6-phosphatase catalytic subunit && sp|Q19KA1|G6PC1_FELCA Glucose-6-phosphatase catalytic subunit 1 OS=Felis catus OX=9685 GN=G6PC1 PE=2 SV=1 && PF01569:PAP2 superfamily	-
103379758	1754.86	1100.81	1812.19	5547.51	3285.27	4828.72	1555.95	4553.83	-1.5492	1.74e-06	5.45e-05	LOC103379758	NC_024312.1	4999230	5011832	+	5511	protein_coding	choline kinase alpha-like%2C transcript variant X3 && sp|P35790|CHKA_HUMAN Choline kinase alpha OS=Homo sapiens OX=9606 GN=CHKA PE=1 SV=3 && PF01633:Choline/ethanolamine kinase	-
103391963	54.3462	34.3688	60.4684	8.34055	6.86338	9.02564	49.7278	8.07652	2.61976	1.77e-06	5.54e-05	cenpj	NC_024322.1	8778057	8787135	-	4601	protein_coding	centromere protein J%2C transcript variant X1 && sp|Q9HC77|CENPJ_HUMAN Centromere protein J OS=Homo sapiens OX=9606 GN=CENPJ PE=1 SV=2 && PF07202:T-complex protein 10 C-terminus	-
103388348	117.458	110.182	88.3768	261.685	237.931	252.718	105.339	250.778	-1.25136	1.77e-06	5.54e-05	LOC103388348	NC_024319.1	7667051	7748966	+	3582	protein_coding	DNA-binding protein SATB1-like%2C transcript variant X4 && sp|Q01826|SATB1_HUMAN DNA-binding protein SATB1 OS=Homo sapiens OX=9606 GN=SATB1 PE=1 SV=1 && PF16557:CUT1-like DNA-binding domain of SATB|PF02376:CUT domain|PF16534:Ubiquitin-like oligomerisation domain of SATB	CUT
103379718	192.841	82.8894	195.359	2.08514	22.8779	23.0655	157.03	16.0095	3.29656	1.8e-06	5.6e-05	pclaf	NC_024312.1	4640289	4642953	-	571	protein_coding	PCNA clamp associated factor && sp|Q6AZL2|PAF15_XENTR PCNA-associated factor OS=Xenopus tropicalis OX=8364 GN=pclaf PE=2 SV=1 && PF15715:PCNA-associated factor histone like domain	-
103395183	339.225	466	373.974	1124.93	1473.34	784.228	393.066	1127.5	-1.5204	1.81e-06	5.62e-05	LOC103395183	NC_024325.1	9174541	9185769	-	3720	protein_coding	carbohydrate-responsive element-binding protein%2C transcript variant X1 && sp|Q99MZ3|MLXPL_MOUSE Carbohydrate-responsive element-binding protein OS=Mus musculus OX=10090 GN=Mlxipl PE=1 SV=1 && PF00010:Helix-loop-helix DNA-binding domain	bHLH
103376728	302.41	1005.79	356.298	3053.68	2165.4	2747.81	554.834	2655.63	-2.25943	1.85e-06	5.73e-05	LOC103376728	NC_024308.1	18742522	18758813	-	3518	protein_coding	cytochrome P450 2J2-like && sp|Q9QXF7|CP2J4_RAT Cytochrome P450 2J4 OS=Rattus norvegicus OX=10116 GN=CYP2J4 PE=1 SV=1 && PF00067:Cytochrome P450	-
103388219	138.495	171.844	120.006	306.515	366.047	407.157	143.448	359.906	-1.32821	1.85e-06	5.73e-05	LOC103388219	NC_024319.1	4744982	4746358	+	690	protein_coding	protein S100-A6-like && - && PF01023:S-100/ICaBP type calcium binding domain|PF00036:EF hand	-
103389819	9310.73	9846.66	9728.89	17631.9	24415.3	18609.9	9628.76	20219	-1.07028	1.9e-06	5.86e-05	eef1b2	NC_024320.1	16294225	16296252	-	806	protein_coding	eukaryotic translation elongation factor 1 beta 2 && sp|P24534|EF1B_HUMAN Elongation factor 1-beta OS=Homo sapiens OX=9606 GN=EEF1B2 PE=1 SV=3 && PF00736:EF-1 guanine nucleotide exchange domain|PF10587:Eukaryotic elongation factor 1 beta central acidic region	-
103380280	811.686	1182.69	800.973	2924.4	1981.23	2303.54	931.783	2403.06	-1.36711	1.91e-06	5.89e-05	LOC103380280	NC_024312.1	13120336	13134303	+	4027	protein_coding	protein phosphatase 1 regulatory subunit 12A-like%2C transcript variant X3 && sp|Q10728|MYPT1_RAT Protein phosphatase 1 regulatory subunit 12A OS=Rattus norvegicus OX=10116 GN=Ppp1r12a PE=1 SV=2 && -	-
103390952	66.6179	35.3796	99.5402	2.08514	5.71949	12.0342	67.1792	6.61294	3.33769	1.93e-06	5.94e-05	LOC103390952	NC_024321.1	10461523	10463470	-	1113	protein_coding	polyamine-modulated factor 1-like && sp|Q9CPV5|PMF1_MOUSE Polyamine-modulated factor 1 OS=Mus musculus OX=10090 GN=Pmf1 PE=1 SV=1 && PF03980:Nnf1	-
103389994	7815.33	8440.57	9426.55	18702.6	22513	15426.8	8560.82	18880.8	-1.14109	2e-06	6.14e-05	btf3	NC_024320.1	18743899	18746761	+	1103	protein_coding	basic transcription factor 3 && sp|P20290|BTF3_HUMAN Transcription factor BTF3 OS=Homo sapiens OX=9606 GN=BTF3 PE=1 SV=1 && PF01849:NAC domain	-
103390654	397.954	399.284	442.814	863.247	932.276	743.111	413.351	846.211	-1.03337	2.04e-06	6.27e-05	fam13b	NC_024321.1	4277710	4313293	+	6140	protein_coding	family with sequence similarity 13 member B && sp|Q9NYF5|FA13B_HUMAN Protein FAM13B OS=Homo sapiens OX=9606 GN=FAM13B PE=1 SV=2 && PF00620:RhoGAP domain	-
103379502	1342	1533.45	2031.74	546.306	761.836	673.914	1635.73	660.685	1.30807	2.07e-06	6.34e-05	sf3b3	NC_024312.1	925626	984202	-	5235	protein_coding	splicing factor 3b subunit 3%2C transcript variant X2 && sp|Q1LVE8|SF3B3_DANRE Splicing factor 3B subunit 3 OS=Danio rerio OX=7955 GN=sf3b3 PE=2 SV=1 && PF03178:CPSF A subunit region|PF10433:Mono-functional DNA-alkylating methyl methanesulfonate N-term	-
103380974	15.7779	75.8135	29.769	602.605	194.463	206.587	40.4535	334.551	-3.05201	2.11e-06	6.46e-05	fndc1	NC_024313.1	6832535	6865928	-	6173	protein_coding	fibronectin type III domain containing 1%2C transcript variant X1 && sp|Q2Q0I9|FNDC1_RAT Fibronectin type III domain-containing protein 1 OS=Rattus norvegicus OX=10116 GN=Fndc1 PE=1 SV=2 && PF00041:Fibronectin type III domain	-
103394752	71.0006	130.399	42.793	4.17027	10.2951	15.0427	81.3976	9.83603	3.04514	2.13e-06	6.5e-05	LOC103394752	NC_024325.1	591068	599364	-	5883	protein_coding	protocadherin beta-16-like%2C transcript variant X1 && sp|Q9Y5I4|PCDC2_HUMAN Protocadherin alpha-C2 OS=Homo sapiens OX=9606 GN=PCDHAC2 PE=2 SV=1 && PF00028:Cadherin domain|PF08266:Cadherin-like|PF16492:Cadherin cytoplasmic C-terminal	-
103380397	988.75	847.089	978.657	445.177	430.105	513.459	938.165	462.914	1.01891	2.14e-06	6.52e-05	LOC103380397	NC_024312.1	15341779	15351723	+	3408	protein_coding	nucleosome assembly protein 1-like 4 && sp|Q99733|NP1L4_HUMAN Nucleosome assembly protein 1-like 4 OS=Homo sapiens OX=9606 GN=NAP1L4 PE=1 SV=1 && PF00956:Nucleosome assembly protein (NAP)	-
103378100	106.939	110.182	149.775	439.964	281.399	310.883	122.299	344.082	-1.49257	2.19e-06	6.65e-05	schip1	NC_024310.1	11581572	11744059	-	4796	protein_coding	schwannomin interacting protein 1%2C transcript variant X2 && sp|A0A088MLT8|IQIP1_MOUSE IQCJ-SCHIP1 readthrough transcript protein OS=Mus musculus OX=10090 GN=Iqcj-Schip1 PE=1 SV=2 && PF15157:Fusion protein IQCJ-SCHIP1 with IQ-like motif|PF10148:Schwannomin-interacting protein 1	-
103382088	680.204	710.625	1047.5	268.983	369.479	295.84	812.776	311.434	1.38445	2.29e-06	6.93e-05	tomm22	NC_024314.1	11094385	11096523	-	1369	protein_coding	translocase of outer mitochondrial membrane 22 && sp|Q75Q41|TOM22_RAT Mitochondrial import receptor subunit TOM22 homolog OS=Rattus norvegicus OX=10116 GN=Tomm22 PE=1 SV=1 && PF04281:Mitochondrial import receptor subunit Tom22	-
103384051	792.402	817.775	573.054	1524.24	1570.57	1852.26	727.744	1649.02	-1.18025	2.34e-06	7.07e-05	ddx17	NC_024315.1	14563536	14571857	-	2751	protein_coding	DEAD-box helicase 17 && sp|Q501J6|DDX17_MOUSE Probable ATP-dependent RNA helicase DDX17 OS=Mus musculus OX=10090 GN=Ddx17 PE=1 SV=1 && PF00271:Helicase conserved C-terminal domain|PF00270:DEAD/DEAH box helicase	-
103377671	657.413	605.497	629.801	1731.71	1798.21	1104.14	630.904	1544.68	-1.29158	2.49e-06	7.52e-05	ilvbl	NC_024310.1	1957372	1964087	-	3512	protein_coding	ilvB acetolactate synthase like && sp|Q6NV04|HACL2_DANRE 2-hydroxyacyl-CoA lyase 2 OS=Danio rerio OX=7955 GN=ilvbl PE=2 SV=1 && PF02775:Thiamine pyrophosphate enzyme, C-terminal TPP binding domain|PF02776:Thiamine pyrophosphate enzyme, N-terminal TPP binding domain|PF00205:Thiamine pyrophosphate enzyme, central domain	-
103376909	3680.64	5313.01	4890.49	2156.03	1744.44	2220.31	4628.05	2040.26	1.1815	2.52e-06	7.61e-05	hif1a	NC_024307.1	7042554	7056833	+	3601	protein_coding	hypoxia inducible factor 1 subunit alpha%2C transcript variant X1 && sp|Q98SW2|HIF1A_ONCMY Hypoxia-inducible factor 1-alpha OS=Oncorhynchus mykiss OX=8022 GN=hif1a PE=2 SV=1 && PF11413:Hypoxia-inducible factor-1|PF08778:HIF-1 alpha C terminal transactivation domain|PF08447:PAS fold	-
103392333	225.274	290.113	200.941	688.095	573.093	498.416	238.776	586.535	-1.29724	2.54e-06	7.64e-05	LOC103392333	NC_024322.1	15404483	15420362	-	4634	protein_coding	nck-associated protein 5-like && sp|O14513|NCKP5_HUMAN Nck-associated protein 5 OS=Homo sapiens OX=9606 GN=NCKAP5 PE=1 SV=2 && PF15246:Nck-associated protein 5, Peripheral clock protein	-
103388327	9678	4081.8	6489.65	1599.3	2557.75	1502.27	6749.82	1886.44	1.83932	2.54e-06	7.65e-05	txn	NC_024307.1	26966200	26968903	-	529	protein_coding	thioredoxin && sp|Q9DGI3|THIO_ICTPU Thioredoxin OS=Ictalurus punctatus OX=7998 GN=txn PE=3 SV=1 && PF00085:Thioredoxin	-
103382427	879.181	743.983	909.816	284.621	434.681	263.749	844.327	327.684	1.36658	2.55e-06	7.65e-05	LOC103382427	NC_024314.1	15451730	15459430	-	1994	protein_coding	sorting and assembly machinery component 50 homolog B && sp|Q5U3I0|SAM5B_DANRE Sorting and assembly machinery component 50 homolog B OS=Danio rerio OX=7955 GN=samm50b PE=2 SV=1 && PF01103:Surface antigen	-
103393839	868.662	1681.04	1241	2823.28	4465.78	4056.52	1263.57	3781.86	-1.58177	2.56e-06	7.67e-05	LOC103393839	NC_024324.1	776729	780461	-	1158	protein_coding	proteasome subunit beta type-7-like%2C transcript variant X2 && sp|Q9JHW0|PSB7_RAT Proteasome subunit beta type-7 OS=Rattus norvegicus OX=10116 GN=Psmb7 PE=1 SV=1 && PF00227:Proteasome subunit|PF12465:Proteasome beta subunits C terminal	-
103398237	184.952	141.519	243.734	55.2561	73.2094	47.1339	190.068	58.5332	1.70242	2.61e-06	7.81e-05	LOC103398237	NC_024328.1	19071707	19083148	+	4476	protein_coding	dynamin-1-like protein%2C transcript variant X1 && sp|Q7SXN5|DNM1L_DANRE Dynamin-1-like protein OS=Danio rerio OX=7955 GN=dnm1l PE=2 SV=1 && PF00350:Dynamin family|PF02212:Dynamin GTPase effector domain|PF01031:Dynamin central region	-
103383041	75.3834	31.3362	95.8191	5.21284	11.439	10.0285	67.5129	8.89344	2.92967	2.64e-06	7.89e-05	arhgef39	NC_024314.1	28346370	28375513	-	1560	protein_coding	Rho guanine nucleotide exchange factor 39 && sp|Q0P5E3|ARG39_BOVIN Rho guanine nucleotide exchange factor 39 OS=Bos taurus OX=9913 GN=ARHGEF39 PE=2 SV=1 && PF00621:RhoGEF domain	-
103382565	6.13586	18.1952	8.37254	61.5115	177.304	50.1424	10.9012	96.3194	-3.15098	2.65e-06	7.91e-05	amdhd1	NC_024314.1	17900490	17904337	+	1461	protein_coding	amidohydrolase domain containing 1 && sp|Q7SXK5|HUTI_DANRE Probable imidazolonepropionase OS=Danio rerio OX=7955 GN=amdhd1 PE=2 SV=2 && PF01979:Amidohydrolase family	-
103398855	105.186	149.605	115.355	291.919	279.111	313.892	123.382	294.974	-1.25952	2.67e-06	7.94e-05	LOC103398855	NW_007585132.1	132644	138880	+	1481	protein_coding	acyl-CoA synthetase family member 2%2C mitochondrial-like && sp|Q0P4F7|ACSF2_DANRE Medium-chain acyl-CoA ligase ACSF2, mitochondrial OS=Danio rerio OX=7955 GN=acsf2 PE=2 SV=1 && PF00501:AMP-binding enzyme	-
novel.643	766.982	720.734	687.479	2116.41	1373.82	1538.37	725.065	1676.2	-1.20906	2.67e-06	7.94e-05	-	NC_024325.1	16015836	16029341	+	13433	-	- && - && -	-
103394462	504.017	367.948	557.239	87.5758	199.038	135.385	476.401	140.666	1.76154	2.68e-06	7.95e-05	ilf2	NC_024324.1	11483706	11490524	-	1900	protein_coding	interleukin enhancer binding factor 2%2C transcript variant X2 && sp|Q6NZ06|ILF2_DANRE Interleukin enhancer-binding factor 2 homolog OS=Danio rerio OX=7955 GN=ilf2 PE=2 SV=1 && PF07528:DZF domain	-
103394388	1000.14	246.647	413.045	127.193	78.9289	101.288	553.279	102.47	2.43267	2.7e-06	8e-05	ripor2	NC_024324.1	10234720	10276943	-	5900	protein_coding	RHO family interacting cell polarization regulator 2%2C transcript variant X1 && sp|Q1LU99|RIPR2_DANRE Rho family-interacting cell polarization regulator 2 OS=Danio rerio OX=7955 GN=ripor2 PE=2 SV=1 && PF15903:Filopodia upregulated, FAM65	-
103385003	518.042	474.087	843.766	213.727	242.506	177.504	611.965	211.246	1.53524	2.73e-06	8.08e-05	impdh2	NC_024316.1	11233104	11242243	-	1888	protein_coding	inosine monophosphate dehydrogenase 2 && sp|B0UXP9|IMDH2_DANRE Inosine-5'-monophosphate dehydrogenase 2 OS=Danio rerio OX=7955 GN=impdh2 PE=3 SV=1 && PF00478:IMP dehydrogenase / GMP reductase domain	-
103376682	92.9144	85.922	106.982	212.684	250.514	214.61	95.273	225.936	-1.24459	2.75e-06	8.12e-05	impact	NC_024308.1	16777382	16792607	-	3171	protein_coding	impact RWD domain protein%2C transcript variant X1 && sp|Q642J4|IMPCT_DANRE Protein IMPACT OS=Danio rerio OX=7955 GN=impact PE=2 SV=1 && PF01205:Uncharacterized protein family UPF0029|PF05773:RWD domain	-
103382420	29.8027	23.2495	40.9324	124.066	138.412	85.2421	31.3282	115.906	-1.8841	2.76e-06	8.12e-05	glp2r	NC_024314.1	15376530	15381687	-	2144	protein_coding	glucagon like peptide 2 receptor && sp|O95838|GLP2R_HUMAN Glucagon-like peptide 2 receptor OS=Homo sapiens OX=9606 GN=GLP2R PE=2 SV=1 && PF00002:7 transmembrane receptor (Secretin family)|PF02793:Hormone receptor domain	-
103385018	21.0372	36.3905	27.9085	114.683	188.743	80.2279	28.4454	127.885	-2.17061	2.76e-06	8.12e-05	dnajc16	NC_024316.1	11646498	11657532	-	7455	protein_coding	DnaJ heat shock protein family (Hsp40) member C16%2C transcript variant X1 && sp|Q9Y2G8|DJC16_HUMAN DnaJ homolog subfamily C member 16 OS=Homo sapiens OX=9606 GN=DNAJC16 PE=2 SV=3 && PF00085:Thioredoxin|PF00226:DnaJ domain	-
103384542	2283.42	909.762	1232.62	432.666	450.696	417.185	1475.27	433.516	1.76707	2.82e-06	8.27e-05	acss2	NC_024316.1	2296986	2309116	-	3532	protein_coding	acyl-CoA synthetase short chain family member 2%2C transcript variant X1 && sp|Q9QXG4|ACSA_MOUSE Acetyl-coenzyme A synthetase, cytoplasmic OS=Mus musculus OX=10090 GN=Acss2 PE=1 SV=2 && PF16177:Acetyl-coenzyme A synthetase N-terminus|PF13193:AMP-binding enzyme C-terminal domain|PF00501:AMP-binding enzyme	-
103381592	145.507	144.551	186.987	51.0859	67.49	54.1538	159.015	57.5765	1.46787	2.82e-06	8.27e-05	mto1	NC_024314.1	3274992	3282098	+	2124	protein_coding	mitochondrial tRNA translation optimization 1 && sp|Q923Z3|MTO1_MOUSE Protein MTO1 homolog, mitochondrial OS=Mus musculus OX=10090 GN=Mto1 PE=2 SV=1 && PF13932:GidA associated domain|PF01134:Glucose inhibited division protein A	-
novel.54	106.939	42.4556	146.985	493.135	573.093	315.897	98.7931	460.708	-2.21966	2.92e-06	8.54e-05	-	NC_024307.1	28239182	28242431	-	2850	-	- && - && -	-
103395505	160.409	91.987	242.804	26.0642	46.8998	35.0997	165.067	36.0212	2.19924	2.94e-06	8.61e-05	mis18a	NC_024325.1	14645795	14654623	-	2556	protein_coding	MIS18 kinetochore protein A%2C transcript variant X1 && sp|Q9CZJ6|MS18A_MOUSE Protein Mis18-alpha OS=Mus musculus OX=10090 GN=Mis18a PE=2 SV=1 && PF03226:Yippee zinc-binding/DNA-binding /Mis18, centromere assembly	-
112486242	449.671	324.482	379.555	728.755	1026.08	1005.86	384.569	920.23	-1.25816	3.04e-06	8.89e-05	LOC112486242	NC_024314.1	14791954	14796529	-	2954	protein_coding	UDP-glucuronosyltransferase 2C1-like%2C transcript variant X3 && sp|Q8BWQ1|UD2A3_MOUSE UDP-glucuronosyltransferase 2A3 OS=Mus musculus OX=10090 GN=Ugt2a3 PE=1 SV=1 && PF00201:UDP-glucoronosyl and UDP-glucosyl transferase	-
103387891	286.632	398.274	257.688	633.882	1199.95	990.815	314.198	941.548	-1.58368	3.05e-06	8.9e-05	mecr	NC_024319.1	948104	951563	+	1887	protein_coding	mitochondrial trans-2-enoyl-CoA reductase%2C transcript variant X1 && sp|Q6GQN8|MECR_DANRE Enoyl-[acyl-carrier-protein] reductase, mitochondrial OS=Danio rerio OX=7955 GN=mecr PE=2 SV=2 && PF08240:Alcohol dehydrogenase GroES-like domain|PF00107:Zinc-binding dehydrogenase	-
103382043	220.014	31.3362	35.3507	6.25541	8.00728	2.0057	95.5671	5.4228	4.15056	3.11e-06	9.04e-05	LOC103382043	NC_024314.1	10548854	10570203	-	3301	protein_coding	matrix metalloproteinase-17-like && sp|Q9NPA2|MMP25_HUMAN Matrix metalloproteinase-25 OS=Homo sapiens OX=9606 GN=MMP25 PE=1 SV=1 && PF01471:Putative peptidoglycan binding domain|PF00045:Hemopexin|PF00413:Matrixin	-
103387889	2205.4	1857.94	1789.86	4033.7	4317.07	6982.84	1951.07	5111.2	-1.3894	3.16e-06	9.17e-05	LOC103387889	NC_024319.1	994576	1001783	-	2000	protein_coding	cytochrome P450 4B1-like && sp|P15129|CP4B1_RAT Cytochrome P450 4B1 OS=Rattus norvegicus OX=10116 GN=Cyp4b1 PE=1 SV=3 && PF00067:Cytochrome P450	-
103382329	238.422	225.419	278.154	95.9163	118.965	98.2792	247.332	104.387	1.24609	3.16e-06	9.17e-05	LOC103382329	NC_024314.1	13460302	13466471	-	2650	protein_coding	glucose-induced degradation protein 4 homolog%2C transcript variant X2 && sp|Q8IVV7|GID4_HUMAN Glucose-induced degradation protein 4 homolog OS=Homo sapiens OX=9606 GN=GID4 PE=1 SV=1 && PF09783:Vacuolar import and degradation protein	-
103391306	71.8772	48.5206	177.684	12.5108	4.57559	17.0484	99.3606	11.3783	3.11767	3.2e-06	9.27e-05	haus4	NC_024307.1	32653187	32656566	+	2090	protein_coding	HAUS augmin like complex subunit 4 && sp|Q9H6D7|HAUS4_HUMAN HAUS augmin-like complex subunit 4 OS=Homo sapiens OX=9606 GN=HAUS4 PE=1 SV=1 && PF14735:HAUS augmin-like complex subunit 4	-
103397843	1495.4	1391.94	2455.95	4467.41	4373.12	5296.04	1781.09	4712.19	-1.40362	3.24e-06	9.37e-05	LOC103397843	NC_024328.1	11175125	11183697	-	1229	protein_coding	calcineurin B homologous protein 3 && sp|Q5U554|CHP3_XENLA Calcineurin B homologous protein 3 OS=Xenopus laevis OX=8355 GN=tesc PE=2 SV=1 && -	-
103380482	595.178	575.172	644.686	257.514	334.018	269.766	605.012	287.1	1.07628	3.3e-06	9.52e-05	LOC103380482	NC_024312.1	16347779	16349618	-	1313	protein_coding	cAMP-regulated phosphoprotein 19%2C transcript variant X2 && sp|Q28055|ARP19_BOVIN cAMP-regulated phosphoprotein 19 OS=Bos taurus OX=9913 GN=ARPP19 PE=1 SV=2 && -	-
103384470	25.42	86.9328	193.499	13.5534	6.86338	5.01424	101.951	8.47701	3.58752	3.31e-06	9.53e-05	acot7	NC_024316.1	1582432	1612685	-	2073	protein_coding	acyl-CoA thioesterase 7%2C transcript variant X2 && sp|Q91V12|BACH_MOUSE Cytosolic acyl coenzyme A thioester hydrolase OS=Mus musculus OX=10090 GN=Acot7 PE=1 SV=2 && PF03061:Thioesterase superfamily	-
103398807	534.696	380.078	637.243	181.407	217.341	205.584	517.339	201.444	1.36136	3.32e-06	9.56e-05	akr1a1	NC_024308.1	10744907	10748986	+	1398	protein_coding	aldo-keto reductase family 1 member A1%2C transcript variant X1 && sp|Q568L5|A1A1B_DANRE Aldo-keto reductase family 1 member A1-B OS=Danio rerio OX=7955 GN=akr1a1b PE=2 SV=1 && PF00248:Aldo/keto reductase family	-
103379300	227.903	212.278	397.231	93.8312	93.7996	76.2165	279.137	87.9491	1.66709	3.33e-06	9.56e-05	mrpl46	NC_024311.1	16316242	16320404	+	1015	protein_coding	mitochondrial ribosomal protein L46%2C transcript variant X2 && sp|Q5RK00|RM46_RAT 39S ribosomal protein L46, mitochondrial OS=Rattus norvegicus OX=10116 GN=Mrpl46 PE=2 SV=1 && PF11788:39S mitochondrial ribosomal protein L46	-
103387020	65.7413	72.7809	415.836	14.596	11.439	24.0684	184.786	16.7011	3.46464	3.38e-06	9.7e-05	kif20b	NC_024318.1	3443137	3464391	+	5742	protein_coding	kinesin family member 20B%2C transcript variant X1 && sp|Q80WE4|KI20B_MOUSE Kinesin-like protein KIF20B OS=Mus musculus OX=10090 GN=Kif20b PE=1 SV=3 && PF00225:Kinesin motor domain	-
103393871	251.57	436.686	289.318	826.757	1447.03	836.376	325.858	1036.72	-1.67009	3.44e-06	9.84e-05	LOC103393871	NC_024324.1	1260319	1263325	-	724	lncRNA	uncharacterized LOC103393871 && - && -	-
103389997	1189.48	1470.78	1644.74	628.669	737.814	547.555	1435	638.013	1.16966	3.51e-06	0.000100257	abce1	NC_024307.1	29021481	29027029	-	2337	protein_coding	ATP binding cassette subfamily E member 1 && sp|P61221|ABCE1_HUMAN ATP-binding cassette sub-family E member 1 OS=Homo sapiens OX=9606 GN=ABCE1 PE=1 SV=1 && PF04068:Possible Fer4-like domain in RNase L inhibitor, RLI|PF00037:4Fe-4S binding domain|PF00005:ABC transporter	-
103377213	6646.01	8943.97	10782.9	24062.5	19472.6	19287.8	8790.96	20940.9	-1.25225	3.56e-06	0.000101687	vill	NC_024309.1	10604453	10614973	+	3570	protein_coding	villin like && sp|P02640|VILI_CHICK Villin-1 OS=Gallus gallus OX=9031 GN=VIL1 PE=1 SV=2 && PF00626:Gelsolin repeat|PF02209:Villin headpiece domain	-
103377050	698.611	554.955	719.108	212.684	276.823	324.923	657.558	271.477	1.27632	3.57e-06	0.000101766	wdr37	NC_024309.1	6908102	6923809	-	2604	protein_coding	WD repeat domain 37%2C transcript variant X1 && sp|Q6DDF0|WDR37_XENLA WD repeat-containing protein 37 OS=Xenopus laevis OX=8355 GN=wdr37 PE=2 SV=1 && PF00400:WD domain, G-beta repeat	-
103379009	4842.95	4135.37	8299.98	1746.3	2322.11	1782.06	5759.43	1950.16	1.56242	3.58e-06	0.000101776	LOC103379009	NC_024307.1	1794385	1798116	+	1886	protein_coding	tubulin beta-4B chain%2C transcript variant X1 && sp|Q3MHM5|TBB4B_BOVIN Tubulin beta-4B chain OS=Bos taurus OX=9913 GN=TUBB4B PE=2 SV=1 && PF00091:Tubulin/FtsZ family, GTPase domain|PF03953:Tubulin C-terminal domain	-
103398401	2138.78	4913.72	2467.11	9676.08	10841.9	9937.23	3173.21	10151.7	-1.67781	3.6e-06	0.000102413	LOC103398401	NC_024308.1	10526859	10531933	+	1846	protein_coding	aldehyde dehydrogenase family 9 member A1 && sp|Q19A30|AL9A1_ORYLA 4-trimethylaminobutyraldehyde dehydrogenase OS=Oryzias latipes OX=8090 GN=aldh9A1 PE=2 SV=1 && PF00171:Aldehyde dehydrogenase family	-
103377512	859.02	829.905	473.514	2050.73	2890.63	1669.74	720.813	2203.7	-1.61214	3.79e-06	0.000107516	LOC103377512	NC_024309.1	15915488	15920430	+	1283	protein_coding	tumor necrosis factor ligand superfamily member 10-like && sp|P50592|TNF10_MOUSE Tumor necrosis factor ligand superfamily member 10 OS=Mus musculus OX=10090 GN=Tnfsf10 PE=2 SV=1 && PF00229:TNF(Tumour Necrosis Factor) family	-
103384772	5144.48	3207.42	3397.39	1083.23	1827.95	1104.14	3916.43	1338.44	1.54923	3.82e-06	0.000108295	nadk	NC_024316.1	6967463	6982086	+	6602	protein_coding	NAD kinase%2C transcript variant X4 && sp|P58058|NADK_MOUSE NAD kinase OS=Mus musculus OX=10090 GN=Nadk PE=1 SV=2 && PF01513:ATP-NAD kinase	-
103382245	10.5186	14.1519	6.51198	192.875	232.211	15.0427	10.3941	146.71	-3.82087	3.9e-06	0.000110307	slc16a12	NC_024314.1	14452930	14461417	-	3754	protein_coding	solute carrier family 16 member 12%2C transcript variant X1 && sp|Q503M4|MT12B_DANRE Monocarboxylate transporter 12-B OS=Danio rerio OX=7955 GN=slc16a12b PE=2 SV=1 && PF07690:Major Facilitator Superfamily	-
103391677	2642.8	2674.7	4573.27	1307.38	1218.25	1283.65	3296.92	1269.76	1.37655	3.91e-06	0.000110447	LOC103391677	NC_024322.1	2927098	2932698	+	1943	protein_coding	tubulin alpha chain-like && sp|Q91060|TBA_NOTVI Tubulin alpha chain OS=Notophthalmus viridescens OX=8316 PE=2 SV=1 && PF00091:Tubulin/FtsZ family, GTPase domain|PF03953:Tubulin C-terminal domain	-
novel.25	169.174	169.822	219.547	364.899	503.315	455.293	186.181	441.169	-1.24425	3.99e-06	0.000112575	-	NC_024307.1	24192106	24196129	+	2340	-	- && - && -	-
103398018	231.41	106.139	210.244	26.0642	43.4681	57.1624	182.597	42.2316	2.11237	4e-06	0.000112744	LOC103398018	NC_024328.1	14583036	14588311	+	4359	protein_coding	DNA excision repair protein ERCC-6-like && sp|A2BGR3|ERC6L_DANRE DNA excision repair protein ERCC-6-like OS=Danio rerio OX=7955 GN=ercc6l PE=1 SV=1 && PF00176:SNF2 family N-terminal domain|PF00271:Helicase conserved C-terminal domain	-
103393736	119.211	341.666	159.078	28.1494	57.1949	19.0541	206.652	34.7995	2.57408	4.02e-06	0.000112971	LOC103393736	NC_024308.1	2065033	2067893	-	1845	protein_coding	uncharacterized LOC103393736 && - && PF15443:Domain of unknown function (DUF4630)	-
103378759	1333.23	1808.4	727.481	5904.07	7605.77	2926.31	1289.71	5478.72	-2.08684	4.03e-06	0.000112971	sord	NC_024311.1	5344266	5347218	-	1333	protein_coding	sorbitol dehydrogenase && sp|Q58D31|DHSO_BOVIN Sorbitol dehydrogenase OS=Bos taurus OX=9913 GN=SORD PE=1 SV=3 && PF08240:Alcohol dehydrogenase GroES-like domain|PF00107:Zinc-binding dehydrogenase	-
103394008	75.3834	28.3037	106.052	3.12771	6.86338	12.0342	69.9131	7.34176	3.24758	4.06e-06	0.00011368	cdca5	NC_024324.1	2930961	2932052	+	1092	protein_coding	cell division cycle associated 5 && sp|Q563C3|CCA5A_XENLA Sororin OS=Xenopus laevis OX=8355 GN=cdca5-a PE=1 SV=1 && -	-
103391727	17.531	24.2603	25.1176	65.6818	116.678	80.2279	22.303	87.5291	-1.97354	4.07e-06	0.000113943	creg2	NC_024322.1	3209550	3211761	+	1207	protein_coding	cellular repressor of E1A stimulated genes 2 && sp|Q8BGC9|CREG2_MOUSE Protein CREG2 OS=Mus musculus OX=10090 GN=Creg2 PE=1 SV=1 && PF13883:Pyridoxamine 5'-phosphate oxidase	-
103393427	1640.03	1545.58	1690.32	609.903	873.938	810.302	1625.31	764.714	1.08794	4.18e-06	0.000116577	psmd3	NC_024323.1	13088747	13092834	-	1890	protein_coding	proteasome 26S subunit%2C non-ATPase 3 && sp|Q2KJ46|PSMD3_BOVIN 26S proteasome non-ATPase regulatory subunit 3 OS=Bos taurus OX=9913 GN=PSMD3 PE=2 SV=1 && PF08375:Proteasome regulatory subunit C-terminal|PF01399:PCI domain	-
novel.329	48.2103	41.4447	9.30282	157.428	162.433	350.997	32.9859	223.619	-2.76132	4.25e-06	0.000118283	-	NC_024316.1	14158877	14171317	-	1056	-	- && - && -	-
103383899	578.524	694.452	759.11	2893.13	1936.62	1303.7	677.362	2044.48	-1.59379	4.26e-06	0.00011844	LOC103383899	NC_024315.1	10963268	10979111	-	4145	protein_coding	microtubule-associated tumor suppressor 1 homolog A-like && sp|A0JMQ7|MTS1A_DANRE Microtubule-associated tumor suppressor 1 homolog A OS=Danio rerio OX=7955 GN=mtus1a PE=2 SV=1 && -	-
103397335	596.055	542.825	448.396	1009.21	1559.13	1217.46	529.092	1261.93	-1.25378	4.3e-06	0.000119351	ssh1	NC_024328.1	470636	488833	+	4293	protein_coding	slingshot protein phosphatase 1%2C transcript variant X1 && sp|Q8WYL5|SSH1_HUMAN Protein phosphatase Slingshot homolog 1 OS=Homo sapiens OX=9606 GN=SSH1 PE=1 SV=2 && -	-
103388816	38.5683	27.2929	17.6754	303.387	931.133	32.0912	27.8455	422.204	-3.92135	4.36e-06	0.000120571	LOC103388816	NC_024319.1	17536052	17545787	+	2561	protein_coding	carcinoembryonic antigen-related cell adhesion molecule 5-like && sp|Q9D2Z1|CEA20_MOUSE Carcinoembryonic antigen-related cell adhesion molecule 20 OS=Mus musculus OX=10090 GN=Ceacam20 PE=1 SV=1 && PF13895:Immunoglobulin domain|PF13927:Immunoglobulin domain|PF07679:Immunoglobulin I-set domain|PF00047:Immunoglobulin domain|PF07686:Immunoglobulin V-set domain	-
103391505	1626	1230.2	1421.47	665.159	756.116	577.641	1425.89	666.305	1.09809	4.36e-06	0.000120571	sucla2	NC_024322.1	357393	365944	-	2728	protein_coding	succinate-CoA ligase ADP-forming beta subunit%2C transcript variant X1 && sp|Q148D5|SUCB1_BOVIN Succinate--CoA ligase [ADP-forming] subunit beta, mitochondrial OS=Bos taurus OX=9913 GN=SUCLA2 PE=2 SV=1 && PF00549:CoA-ligase|PF08442:ATP-grasp domain	-
103381466	1329.73	1180.67	1192.62	533.795	706.929	556.581	1234.34	599.102	1.04339	4.53e-06	0.000124958	LOC103381466	NC_024314.1	1478657	1492715	-	5230	protein_coding	ATP-citrate synthase-like && sp|Q2TCH3|ACLY_SHEEP ATP-citrate synthase OS=Ovis aries OX=9940 GN=ACLY PE=2 SV=1 && PF16114:ATP citrate lyase citrate-binding|PF02629:CoA binding domain|PF00549:CoA-ligase|PF00285:Citrate synthase, C-terminal domain	-
103386546	5105.91	4598.34	5512.85	8833.68	12459.3	10544	5072.37	10612.3	-1.06497	4.57e-06	0.000125783	LOC103386546	NC_024317.1	15478550	15480687	-	559	protein_coding	60S acidic ribosomal protein P2-like && sp|P05387|RLA2_HUMAN 60S acidic ribosomal protein P2 OS=Homo sapiens OX=9606 GN=RPLP2 PE=1 SV=1 && PF00428:60s Acidic ribosomal protein	-
103381695	394.448	358.851	555.379	151.172	132.692	199.567	436.226	161.144	1.43575	4.57e-06	0.000125783	LOC103381695	NC_024314.1	5076756	5105436	+	5214	protein_coding	uncharacterized LOC103381695%2C transcript variant X2 && - && -	-
103383293	201.607	73.7918	122.797	21.8939	35.4608	28.0798	132.732	28.4782	2.22437	4.59e-06	0.000126155	cdc25b	NC_024307.1	18548861	18555162	-	3058	protein_coding	cell division cycle 25B && sp|P30304|MPIP1_HUMAN M-phase inducer phosphatase 1 OS=Homo sapiens OX=9606 GN=CDC25A PE=1 SV=2 && PF06617:M-phase inducer phosphatase|PF00581:Rhodanese-like domain	-
103387892	1267.49	809.688	1204.72	477.496	464.422	327.932	1093.97	423.283	1.3704	4.78e-06	0.000130734	LOC103387892	NC_024307.1	26508522	26510236	-	564	protein_coding	cytochrome c oxidase subunit 8B%2C mitochondrial && sp|Q863G0|COX8B_ATEBE Cytochrome c oxidase subunit 8B, mitochondrial OS=Ateles belzebuth OX=9507 GN=COX8B PE=3 SV=1 && -	-
103391725	826.588	1212	1201.92	2347.86	3059.93	2273.46	1080.17	2560.42	-1.24522	4.78e-06	0.000130734	kiaa1211l	NC_024322.1	3201703	3209575	+	6073	protein_coding	KIAA1211 like && sp|Q6NV74|CRCDL_HUMAN CRACD-like protein OS=Homo sapiens OX=9606 GN=CRACDL PE=1 SV=3 && PF15262:Domain of unknown function (DUF4592)	-
103377108	154.273	161.735	79.074	506.688	396.932	345.983	131.694	416.535	-1.66156	4.88e-06	0.000133217	znf438	NC_024309.1	8550561	8605607	+	12505	protein_coding	zinc finger protein 438%2C transcript variant X12 && sp|Q5RC05|ZN438_PONAB Zinc finger protein 438 OS=Pongo abelii OX=9601 GN=ZNF438 PE=2 SV=1 && -	zf-C2H2
103394339	1377.06	577.193	601.893	239.791	258.521	223.635	852.049	240.649	1.82448	4.95e-06	0.00013504	LOC103394339	NC_024324.1	9672836	9687813	-	3332	protein_coding	proto-oncogene tyrosine-protein kinase Yrk%2C transcript variant X2 && sp|Q02977|YRK_CHICK Proto-oncogene tyrosine-protein kinase Yrk OS=Gallus gallus OX=9031 GN=YRK PE=2 SV=2 && PF00018:SH3 domain|PF00017:SH2 domain|PF07714:Protein tyrosine kinase	-
103396722	438.276	154.66	284.666	58.3838	81.2167	25.0712	292.534	54.8906	2.41743	5.34e-06	0.000145274	LOC103396722	NC_024326.1	12974238	12977717	-	1301	protein_coding	protein lifeguard 1-like && sp|Q32L53|LFG1_BOVIN Protein lifeguard 1 OS=Bos taurus OX=9913 GN=GRINA PE=2 SV=1 && PF01027:Inhibitor of apoptosis-promoting Bax1	-
103390400	54.3462	56.6074	54.8867	120.938	156.714	147.419	55.2801	141.69	-1.35775	5.47e-06	0.000148735	LOC103390400	NC_024320.1	27574754	27586376	-	5453	protein_coding	macrophage mannose receptor 1-like%2C transcript variant X2 && sp|Q61830|MRC1_MOUSE Macrophage mannose receptor 1 OS=Mus musculus OX=10090 GN=Mrc1 PE=1 SV=2 && PF00754:F5/8 type C domain|PF03815:LCCL domain|PF00059:Lectin C-type domain	-
103397894	74.5068	54.5857	47.4444	165.768	142.987	191.544	58.8457	166.767	-1.50163	5.48e-06	0.000148735	trim36	NC_024328.1	12126298	12156236	-	6503	protein_coding	tripartite motif containing 36%2C transcript variant X3 && sp|Q9NQ86|TRI36_HUMAN E3 ubiquitin-protein ligase TRIM36 OS=Homo sapiens OX=9606 GN=TRIM36 PE=1 SV=2 && PF00643:B-box zinc finger|PF13445:RING-type zinc-finger	-
103395063	233.163	164.768	192.568	714.159	465.566	426.211	196.833	535.312	-1.44271	5.52e-06	0.000149522	LOC103395063	NC_024325.1	6427475	6445928	-	17097	protein_coding	centromere protein F-like%2C transcript variant X5 && - && -	-
103382777	40.3214	78.846	80.0043	218.939	218.484	183.521	66.3906	206.982	-1.64286	5.53e-06	0.000149567	LOC103382777	NC_024314.1	21847977	21878974	+	4535	protein_coding	hepatocyte growth factor-like && sp|Q867B7|HGF_CANLF Hepatocyte growth factor OS=Canis lupus familiaris OX=9615 GN=HGF PE=2 SV=1 && PF00051:Kringle domain|PF00089:Trypsin|PF00024:PAN domain	-
103391653	261.212	450.838	188.847	102.172	70.9216	75.2137	300.299	82.769	1.85808	5.6e-06	0.000151388	tnfaip6	NC_024322.1	2240622	2245593	-	827	protein_coding	TNF alpha induced protein 6 && sp|P98065|TSG6_RABIT Tumor necrosis factor-inducible gene 6 protein OS=Oryctolagus cuniculus OX=9986 GN=TNFAIP6 PE=2 SV=1 && PF00193:Extracellular link domain|PF00431:CUB domain	-
103388299	396.201	442.751	400.952	1116.59	711.504	1065.03	413.301	964.374	-1.22287	5.72e-06	0.000154355	cck	NC_024319.1	5906267	5909733	-	1066	protein_coding	cholecystokinin && sp|O93464|CCKN_CARAU Cholecystokinin OS=Carassius auratus OX=7957 GN=cck PE=2 SV=1 && PF00918:Gastrin/cholecystokinin family	-
novel.279	238.422	25.2712	125.588	18.7662	5.71949	4.0114	129.76	9.49904	3.77131	5.82e-06	0.000156893	-	NC_024315.1	9262918	9264648	+	907	-	- && - && -	-
103389451	302.41	245.636	142.333	713.117	569.661	760.159	230.126	680.979	-1.56509	5.87e-06	0.000157746	LOC103389451	NC_024320.1	8101016	8134795	+	9253	protein_coding	dedicator of cytokinesis protein 9-like%2C transcript variant X1 && sp|Q9BZ29|DOCK9_HUMAN Dedicator of cytokinesis protein 9 OS=Homo sapiens OX=9606 GN=DOCK9 PE=1 SV=2 && PF11878:Domain of unknown function (DUF3398)|PF00169:PH domain|PF06920:Dock homology region 2|PF14429:C2 domain in Dock180 and Zizimin proteins	-
103391448	187.582	501.38	217.686	845.523	1475.63	1289.66	302.216	1203.6	-1.99448	5.91e-06	0.000158822	LOC103391448	NC_024321.1	19792572	19795098	-	1384	protein_coding	uncharacterized LOC103391448 && - && PF04103:CD20-like family	-
103390006	2940.83	9579.79	4469.08	22345.4	31354.2	17947	5663.23	23882.2	-2.07628	5.96e-06	0.00015974	LOC103390006	NC_024307.1	29044241	29045895	+	717	protein_coding	HLA class II histocompatibility antigen%2C DP alpha 1 chain-like && sp|P06343|HB2K_MOUSE H-2 class II histocompatibility antigen, A-K beta chain OS=Mus musculus OX=10090 GN=H2-Ab1 PE=1 SV=1 && PF00993:Class II histocompatibility antigen, alpha domain|PF07654:Immunoglobulin C1-set domain	-
103392834	563.622	767.233	729.341	1242.74	1834.81	1765.01	686.732	1614.19	-1.23318	6.1e-06	0.000163296	LOC103392834	NC_024323.1	5771160	5782806	+	2792	protein_coding	ethanolamine-phosphate cytidylyltransferase-like && sp|Q5EA75|PCY2_BOVIN Ethanolamine-phosphate cytidylyltransferase OS=Bos taurus OX=9913 GN=PCYT2 PE=2 SV=1 && PF01467:Cytidylyltransferase-like	-
103379882	15.7779	53.5749	13.9542	304.43	426.674	65.1852	27.769	265.43	-3.26069	6.13e-06	0.000163876	slc13a1	NC_024312.1	6261512	6268065	+	2246	protein_coding	solute carrier family 13 member 1 && sp|Q07782|S13A1_RAT Solute carrier family 13 member 1 OS=Rattus norvegicus OX=10116 GN=Slc13a1 PE=2 SV=1 && PF00939:Sodium:sulfate symporter transmembrane region	-
103383780	898.465	953.228	1338.68	453.517	496.452	475.35	1063.46	475.106	1.16253	6.14e-06	0.000163952	srp68	NC_024315.1	9277591	9286552	+	3823	protein_coding	signal recognition particle 68 && sp|Q00004|SRP68_CANLF Signal recognition particle subunit SRP68 OS=Canis lupus familiaris OX=9615 GN=SRP68 PE=1 SV=1 && PF16969:RNA-binding signal recognition particle 68	-
103393131	905.477	436.686	468.862	205.386	156.714	205.584	603.675	189.228	1.67353	6.15e-06	0.000164045	LOC103393131	NC_024323.1	9866031	9897447	+	1800	protein_coding	synaptic vesicle membrane protein VAT-1 homolog%2C transcript variant X2 && sp|Q8JFV8|VAT1_DANRE Synaptic vesicle membrane protein VAT-1 homolog OS=Danio rerio OX=7955 GN=vat1 PE=2 SV=1 && PF13602:Zinc-binding dehydrogenase|PF08240:Alcohol dehydrogenase GroES-like domain	-
103378073	76.26	75.8135	134.891	242.918	277.967	345.983	95.6548	288.956	-1.59486	6.3e-06	0.000167665	sarm1	NC_024310.1	11017147	11023646	-	3825	protein_coding	sterile alpha and TIR motif containing 1 && sp|F1QWA8|SARM1_DANRE NAD(+) hydrolase SARM1 OS=Danio rerio OX=7955 GN=sarm1 PE=1 SV=1 && PF07647:SAM domain (Sterile alpha motif)|PF13676:TIR domain|PF00536:SAM domain (Sterile alpha motif)	-
103385052	10467.8	3964.54	5163.07	2242.56	1758.17	1450.12	6531.79	1816.95	1.84601	6.31e-06	0.000167813	eno1	NC_024316.1	12279723	12288877	-	1933	protein_coding	enolase 1%2C transcript variant X2 && sp|I0J1J1|ENOA_THUAL Alpha-enolase OS=Thunnus albacares OX=8236 GN=ENO1 PE=1 SV=1 && PF00113:Enolase, C-terminal TIM barrel domain|PF03952:Enolase, N-terminal domain	-
103394810	767.859	679.289	1310.77	226.237	330.586	349.994	919.305	302.273	1.60482	6.36e-06	0.000168837	LOC103394810	NC_024325.1	1929939	1932880	+	1085	protein_coding	non-histone chromosomal protein HMG-14B-like && - && -	-
103393890	11.3952	22.2386	18.6056	82.3629	51.4754	120.342	17.4131	84.7267	-2.29007	6.44e-06	0.000170711	bmp8a	NC_024324.1	1531661	1537479	-	1569	protein_coding	bone morphogenetic protein 8a && sp|Q7Z5Y6|BMP8A_HUMAN Bone morphogenetic protein 8A OS=Homo sapiens OX=9606 GN=BMP8A PE=2 SV=2 && PF00019:Transforming growth factor beta like domain|PF00688:TGF-beta propeptide	-
103386188	25.42	65.705	40.9324	5.21284	2.28779	7.01994	44.0191	4.84019	3.16714	6.51e-06	0.000172375	LOC103386188	NC_024317.1	7338190	7346008	+	3307	protein_coding	inter-alpha-trypsin inhibitor heavy chain H3-like%2C transcript variant X3 && sp|Q61704|ITIH3_MOUSE Inter-alpha-trypsin inhibitor heavy chain H3 OS=Mus musculus OX=10090 GN=Itih3 PE=1 SV=3 && PF00092:von Willebrand factor type A domain|PF08487:Vault protein inter-alpha-trypsin domain|PF06668:Inter-alpha-trypsin inhibitor heavy chain C-terminus	-
103377189	118.334	79.8569	186.056	15.6385	19.4463	40.114	128.083	25.0662	2.34962	6.52e-06	0.000172397	plk4	NC_024307.1	6602793	6609956	-	3325	protein_coding	polo like kinase 4 && sp|Q7ZVS3|PLK4_DANRE Serine/threonine-protein kinase PLK4 OS=Danio rerio OX=7955 GN=plk4 PE=2 SV=2 && PF00069:Protein kinase domain|PF18190:Polo-like Kinase 4 Polo Box 1|PF00659:POLO box duplicated region|PF18409:Polo-like Kinase 4 Polo Box 2	-
103390605	98.1737	88.9545	56.7472	655.776	356.896	171.487	81.2918	394.72	-2.27945	6.57e-06	0.000173335	hs3st1	NC_024321.1	2721030	2723155	-	1791	protein_coding	heparan sulfate-glucosamine 3-sulfotransferase 1%2C transcript variant X2 && sp|O14792|HS3S1_HUMAN Heparan sulfate glucosamine 3-O-sulfotransferase 1 OS=Homo sapiens OX=9606 GN=HS3ST1 PE=1 SV=1 && PF00685:Sulfotransferase domain	-
103393696	377.794	554.955	395.37	905.992	991.759	1179.35	442.706	1025.7	-1.21286	6.65e-06	0.000175205	mfsd6l	NC_024323.1	15564239	15568813	-	3551	protein_coding	major facilitator superfamily domain containing 6 like%2C transcript variant X2 && sp|Q6DBX0|MFS6L_DANRE Major facilitator superfamily domain-containing protein 6-like OS=Danio rerio OX=7955 GN=mfsd6l PE=2 SV=1 && PF12832:MFS_1 like family	-
103397551	1528.71	1306.01	1089.36	3882.53	3110.26	2429.9	1308.03	3140.9	-1.2637	6.74e-06	0.000177363	gldc	NC_024328.1	4516403	4525348	+	1973	protein_coding	glycine decarboxylase && sp|Q91W43|GCSP_MOUSE Glycine dehydrogenase (decarboxylating), mitochondrial OS=Mus musculus OX=10090 GN=Gldc PE=1 SV=1 && PF02347:Glycine cleavage system P-protein	-
103378655	88.5317	80.8677	121.867	26.0642	35.4608	21.0598	97.0888	27.5283	1.82386	6.75e-06	0.000177446	acsf3	NC_024311.1	3717820	3741618	+	2909	protein_coding	acyl-CoA synthetase family member 3%2C transcript variant X2 && sp|Q58DN7|ACSF3_BOVIN Malonate--CoA ligase ACSF3, mitochondrial OS=Bos taurus OX=9913 GN=ACSF3 PE=2 SV=1 && PF00501:AMP-binding enzyme|PF13193:AMP-binding enzyme C-terminal domain	-
103379765	92.9144	156.681	90.2374	598.434	225.348	542.541	113.278	455.441	-2.00901	6.82e-06	0.000178981	LOC103379765	NC_024312.1	4317454	4336385	-	7684	protein_coding	protein-methionine sulfoxide oxidase mical2b-like && sp|F1RA39|MCA2B_DANRE Protein-methionine sulfoxide oxidase mical2b OS=Danio rerio OX=7955 GN=mical2b PE=2 SV=2 && PF00307:Calponin homology (CH) domain|PF00412:LIM domain|PF01494:FAD binding domain|PF12130:Bivalent Mical/EHBP Rab binding domain	-
103383824	209.496	178.92	299.551	64.6393	59.4827	97.2763	229.322	73.7994	1.6339	6.84e-06	0.000179187	spag5	NC_024315.1	10448328	10465487	+	5339	protein_coding	sperm associated antigen 5 && - && -	-
103378866	788.019	706.582	964.703	316.941	428.962	357.014	819.768	367.639	1.15752	6.94e-06	0.000181408	psmd13	NC_024311.1	7329794	7333969	+	1424	protein_coding	proteasome 26S subunit%2C non-ATPase 13 && sp|P84169|PSD13_CHICK 26S proteasome non-ATPase regulatory subunit 13 OS=Gallus gallus OX=9031 GN=PSMD13 PE=1 SV=1 && PF01399:PCI domain	-
103396661	38.5683	61.6616	103.261	218.939	242.506	817.322	67.8304	426.256	-2.65253	6.96e-06	0.000181693	LOC103396661	NC_024326.1	12796636	12815149	+	9493	protein_coding	collagen alpha-1(XV) chain-like%2C transcript variant X1 && sp|P39059|COFA1_HUMAN Collagen alpha-1(XV) chain OS=Homo sapiens OX=9606 GN=COL15A1 PE=1 SV=2 && -	-
103379131	273.484	380.078	22.3268	2504.25	2126.51	1706.85	225.296	2112.53	-3.22932	7e-06	0.000182623	LOC103379131	NC_024311.1	12939556	12947300	+	3255	protein_coding	putative hexokinase HKDC1 && sp|Q2TB90|HKDC1_HUMAN Hexokinase HKDC1 OS=Homo sapiens OX=9606 GN=HKDC1 PE=1 SV=3 && PF00349:Hexokinase|PF03727:Hexokinase	-
103379802	136.742	96.0304	207.453	39.6176	46.8998	37.1054	146.742	41.2076	1.83461	7.15e-06	0.00018633	ticrr	NC_024312.1	5212003	5222672	-	6607	protein_coding	TOPBP1 interacting checkpoint and replication regulator && sp|Q6DRL4|TICRR_DANRE Treslin OS=Danio rerio OX=7955 GN=ticrr PE=2 SV=1 && PF15292:Treslin N-terminus	-
103397872	1568.15	924.925	1751.72	484.794	608.553	486.382	1414.93	526.576	1.42641	7.18e-06	0.000186779	LOC103397872	NC_024328.1	10371430	10374221	+	1470	protein_coding	histone H2A.V && sp|Q32LA7|H2AV_BOVIN Histone H2A.V OS=Bos taurus OX=9913 GN=H2AZ2 PE=2 SV=3 && PF00125:Core histone H2A/H2B/H3/H4|PF16211:C-terminus of histone H2A	-
103377183	2369.32	2155.12	3264.36	5000.16	6474.46	6365.08	2596.27	5946.57	-1.19558	7.23e-06	0.000187858	rpl22l1	NC_024309.1	9867788	9869572	+	597	protein_coding	ribosomal protein L22 like 1 && sp|Q6P5R6|RL22L_HUMAN 60S ribosomal protein L22-like 1 OS=Homo sapiens OX=9606 GN=RPL22L1 PE=1 SV=2 && PF01776:Ribosomal L22e protein family	-
103386008	30.6793	53.5749	25.1176	3672.97	4635.07	40.114	36.4573	2782.72	-6.25456	7.35e-06	0.000190682	LOC103386008	NC_024317.1	4660845	4662627	+	1782	protein_coding	ammonium transporter Rh type B-like && sp|Q0IIV2|RHBG_XENTR Ammonium transporter Rh type B OS=Xenopus tropicalis OX=8364 GN=rhbg PE=2 SV=1 && PF00909:Ammonium Transporter Family	-
103385181	276.114	288.091	196.29	660.988	502.171	847.407	253.498	670.189	-1.40313	7.43e-06	0.000192436	pkig	NC_024316.1	14726338	14749684	+	1698	protein_coding	cAMP-dependent protein kinase inhibitor gamma%2C transcript variant X4 && sp|Q7YQJ4|IPKG_PIG cAMP-dependent protein kinase inhibitor gamma OS=Sus scrofa OX=9823 GN=PKIG PE=3 SV=1 && -	-
103390726	1880.2	570.117	905.165	249.174	339.738	220.627	1118.49	269.846	2.05196	7.51e-06	0.000194087	LOC103390726	NC_024321.1	7437083	7439666	+	681	protein_coding	thiosulfate_glutathione sulfurtransferase-like%2C transcript variant X1 && - && PF00581:Rhodanese-like domain	-
103395933	99.9268	61.6616	104.192	401.389	189.887	310.883	88.5934	300.72	-1.76225	7.64e-06	0.000197242	eef2	NC_024326.1	1909576	1937079	+	5471	protein_coding	eukaryotic translation elongation factor 2%2C transcript variant X10 && sp|Q90705|EF2_CHICK Elongation factor 2 OS=Gallus gallus OX=9031 GN=EEF2 PE=1 SV=3 && PF03144:Elongation factor Tu domain 2|PF00679:Elongation factor G C-terminus|PF00009:Elongation factor Tu GTP binding domain|PF14492:Elongation Factor G, domain II|PF03764:Elongation factor G, domain IV	-
103377349	672.315	876.404	1198.2	361.771	256.233	135.385	915.641	251.13	1.86661	7.69e-06	0.000198306	pdss1	NC_024309.1	11972071	11975799	+	2019	protein_coding	decaprenyl diphosphate synthase subunit 1 && sp|Q5T2R2|DPS1_HUMAN All trans-polyprenyl-diphosphate synthase PDSS1 OS=Homo sapiens OX=9606 GN=PDSS1 PE=1 SV=1 && PF00348:Polyprenyl synthetase	-
107988765	398.831	111.193	167.451	34.4048	21.7341	58.1652	225.825	38.1013	2.56481	7.85e-06	0.000201733	LOC107988765	NC_024313.1	13469275	13472426	+	1069	protein_coding	uncharacterized LOC107988765 && - && -	-
novel.699	50.84	76.8243	52.0958	205.386	271.104	131.373	59.92	202.621	-1.75871	7.85e-06	0.000201733	-	NC_024326.1	13802384	13803345	-	911	-	- && - && -	-
103379387	2489.41	314.373	472.583	72.9798	177.304	118.336	1092.12	122.873	3.15254	7.9e-06	0.000202773	LOC103379387	NC_024307.1	11298377	11321762	+	702	protein_coding	immunoglobulin lambda-1 light chain-like && sp|P0DOX8|IGL1_HUMAN Immunoglobulin lambda-1 light chain OS=Homo sapiens OX=9606 PE=1 SV=1 && PF07686:Immunoglobulin V-set domain|PF07654:Immunoglobulin C1-set domain	-
103386060	389.189	352.785	372.113	1474.19	1815.37	622.769	371.362	1304.11	-1.8119	7.92e-06	0.000202773	elmo2	NC_024317.1	4633403	4649038	-	4822	protein_coding	engulfment and cell motility 2%2C transcript variant X1 && sp|Q8BHL5|ELMO2_MOUSE Engulfment and cell motility protein 2 OS=Mus musculus OX=10090 GN=Elmo2 PE=1 SV=1 && PF11841:Domain of unknown function (DUF3361)|PF16457:Pleckstrin homology domain|PF04727:ELMO/CED-12 family	-
103381667	205.99	161.735	103.261	53.171	42.3242	48.1367	156.995	47.8773	1.71272	7.92e-06	0.000202773	hhex	NC_024314.1	4654666	4660925	+	1601	protein_coding	hematopoietically expressed homeobox && sp|Q03014|HHEX_HUMAN Hematopoietically-expressed homeobox protein HHEX OS=Homo sapiens OX=9606 GN=HHEX PE=1 SV=1 && PF00046:Homeodomain	Homeobox
103389187	76.26	50.5423	26.9782	190.79	268.816	159.453	51.2602	206.353	-2.00684	7.94e-06	0.000202779	LOC103389187	NC_024320.1	3669256	3670608	+	967	protein_coding	threonine synthase-like 2 && sp|Q2YDP8|THNS2_DANRE Threonine synthase-like 2 OS=Danio rerio OX=7955 GN=thnsl2 PE=2 SV=1 && -	-
novel.368	127.1	182.963	154.427	65.6818	41.1803	32.0912	154.83	46.3178	1.74041	7.94e-06	0.000202779	-	NC_024317.1	19523673	19529127	-	1441	-	- && - && -	-
103390486	90658.2	127049	59078.5	1212.51	6765.01	122.348	92262	2699.95	5.09475	8.01e-06	0.000204125	LOC103390486	NC_024320.1	28781553	28797120	+	3197	protein_coding	eosinophil peroxidase-like && sp|P11247|PERM_MOUSE Myeloperoxidase OS=Mus musculus OX=10090 GN=Mpo PE=1 SV=2 && PF03098:Animal haem peroxidase	-
103377743	695.105	419.501	793.531	179.322	277.967	187.533	636.046	214.941	1.56633	8.11e-06	0.000206449	blmh	NC_024310.1	3833553	3844703	-	1660	protein_coding	bleomycin hydrolase && sp|P87362|BLMH_CHICK Bleomycin hydrolase OS=Gallus gallus OX=9031 GN=BLMH PE=1 SV=1 && PF03051:Peptidase C1-like family	-
103391647	1250.84	1216.05	1878.24	558.817	703.497	510.45	1448.38	590.921	1.29376	8.15e-06	0.000207037	LOC103391647	NC_024322.1	2545219	2551985	+	1555	protein_coding	MOB-like protein phocein%2C transcript variant X1 && sp|Q5F495|PHOCN_CHICK MOB-like protein phocein OS=Gallus gallus OX=9031 GN=MOB4 PE=2 SV=1 && PF03637:Mob1/phocein family|PF00166:Chaperonin 10 Kd subunit	-
103391726	760.846	1312.08	1106.11	434.751	474.717	360.023	1059.68	423.164	1.32441	8.16e-06	0.000207037	LOC103391726	NC_024307.1	33859449	33911697	+	5771	protein_coding	echinoderm microtubule-associated protein-like 3 && sp|Q32P44|EMAL3_HUMAN Echinoderm microtubule-associated protein-like 3 OS=Homo sapiens OX=9606 GN=EML3 PE=1 SV=1 && PF03451:HELP motif	-
103387118	3143.31	4476.03	2752.71	7282.34	7940.94	10473.8	3457.35	8565.68	-1.30898	8.34e-06	0.00021131	slc3a1	NC_024318.1	5338622	5342966	-	2284	protein_coding	solute carrier family 3 member 1 && sp|Q07837|SLC31_HUMAN Neutral and basic amino acid transport protein rBAT OS=Homo sapiens OX=9606 GN=SLC3A1 PE=1 SV=2 && PF00128:Alpha amylase, catalytic domain	-
103377626	3763.03	2915.28	8679.53	1648.3	631.431	1004.85	5119.28	1094.86	2.2251	8.44e-06	0.000213347	LOC103377626	NC_024310.1	1647257	1649286	+	1312	protein_coding	peptidoglycan-recognition protein SC2-like && sp|Q70PY2|PGSB1_DROME Peptidoglycan-recognition protein SB1 OS=Drosophila melanogaster OX=7227 GN=PGRP-SB1 PE=2 SV=2 && PF01510:N-acetylmuramoyl-L-alanine amidase	-
103396347	1322.72	1080.59	969.354	2059.07	2819.71	2414.86	1124.22	2431.21	-1.11256	8.45e-06	0.000213347	gata6	NC_024326.1	8081393	8087098	+	2997	protein_coding	GATA binding protein 6 && sp|Q91678|GAT6A_XENLA GATA-binding factor 6-A OS=Xenopus laevis OX=8355 GN=gata6-a PE=2 SV=1 && -	zf-GATA
103395479	587.289	573.15	793.531	320.069	223.06	283.806	651.323	275.645	1.24	8.46e-06	0.000213347	slc7a3	NC_024325.1	14238191	14254404	-	5911	protein_coding	solute carrier family 7 member 3%2C transcript variant X6 && sp|Q8WY07|CTR3_HUMAN Cationic amino acid transporter 3 OS=Homo sapiens OX=9606 GN=SLC7A3 PE=1 SV=1 && PF13906:C-terminus of AA_permease|PF13520:Amino acid permease	-
103393756	2331.63	2012.6	2509.9	1017.55	1310.91	1070.04	2284.71	1132.83	1.01234	8.46e-06	0.000213347	psmd1	NC_024308.1	2039151	2064822	-	3252	protein_coding	proteasome 26S subunit%2C non-ATPase 1 && sp|Q5F418|PSMD1_CHICK 26S proteasome non-ATPase regulatory subunit 1 OS=Gallus gallus OX=9031 GN=PSMD1 PE=2 SV=1 && PF13646:HEAT repeats|PF18004:26S proteasome regulatory subunit RPN2 C-terminal domain	-
103385072	1404.23	569.107	925.631	2383.31	3853.79	3292.35	966.324	3176.48	-1.71656	8.48e-06	0.000213452	lmbr1l	NC_024316.1	12725133	12741291	+	3219	protein_coding	limb development membrane protein 1 like && sp|Q803C7|LMBRL_DANRE Limb region 1 homolog-like protein OS=Danio rerio OX=7955 GN=lmbr1l PE=2 SV=1 && PF04791:LMBR1-like membrane protein	-
103390232	464.572	170.833	303.272	107.385	61.7705	53.151	312.892	74.102	2.0785	8.63e-06	0.000216878	LOC103390232	NC_024320.1	24459154	24462794	+	1917	protein_coding	proteinase-activated receptor 3-like && sp|Q58D85|PAR3_BOVIN Proteinase-activated receptor 3 OS=Bos taurus OX=9913 GN=F2RL2 PE=2 SV=1 && PF00001:7 transmembrane receptor (rhodopsin family)	-
103398242	3244.99	2660.55	4126.73	1295.91	1714.7	1333.79	3344.09	1448.13	1.20759	8.72e-06	0.000218812	LOC103398242	NC_024328.1	19198280	19215950	-	4536	protein_coding	glutamine--fructose-6-phosphate aminotransferase [isomerizing] 1 && sp|P82808|GFPT1_RAT Glutamine--fructose-6-phosphate aminotransferase [isomerizing] 1 OS=Rattus norvegicus OX=10116 GN=Gfpt1 PE=1 SV=3 && PF01380:SIS domain|PF13522:Glutamine amidotransferase domain	-
103398252	49.9634	26.282	194.429	4.17027	3.43169	12.0342	90.2248	6.54538	3.77541	8.77e-06	0.000219879	LOC103398252	NC_024308.1	10161400	10163573	-	857	protein_coding	cyclin-dependent kinases regulatory subunit 1-like && sp|Q0P5A5|CKS1_BOVIN Cyclin-dependent kinases regulatory subunit 1 OS=Bos taurus OX=9913 GN=CKS1B PE=3 SV=1 && -	-
103391989	54.3462	44.4772	79.074	8.34055	4.57559	16.0456	59.2991	9.65391	2.60624	8.87e-06	0.000222065	ska3	NC_024322.1	8967841	8972398	-	2230	protein_coding	spindle and kinetochore associated complex subunit 3%2C transcript variant X1 && sp|Q58EL7|SKA3_DANRE Spindle and kinetochore-associated protein 3 OS=Danio rerio OX=7955 GN=ska3 PE=1 SV=2 && -	-
103378439	191.965	232.495	152.566	366.984	581.1	624.775	192.342	524.286	-1.44718	8.92e-06	0.000222967	LOC103378439	NC_024310.1	16677832	16682162	+	3129	protein_coding	interferon alpha/beta receptor 1-like && - && PF01108:Tissue factor|PF09294:Interferon-alpha/beta receptor, fibronectin type III	-
103379298	767.859	714.668	979.587	406.602	403.796	330.94	820.705	380.446	1.10958	9.01e-06	0.000224992	pdpr	NC_024311.1	16302922	16312886	+	4569	protein_coding	pyruvate dehydrogenase phosphatase regulatory subunit && sp|Q8NCN5|PDPR_HUMAN Pyruvate dehydrogenase phosphatase regulatory subunit, mitochondrial OS=Homo sapiens OX=9606 GN=PDPR PE=1 SV=2 && PF08669:Glycine cleavage T-protein C-terminal barrel domain|PF16350:FAD dependent oxidoreductase central domain|PF01266:FAD dependent oxidoreductase|PF01571:Aminomethyltransferase folate-binding domain	-
103391884	276.99	197.115	228.849	638.052	458.703	526.496	234.318	541.083	-1.20677	9.13e-06	0.000227583	dirc2	NC_024322.1	7028004	7072039	-	3899	protein_coding	disrupted in renal carcinoma 2 && sp|Q96SL1|DIRC2_HUMAN Solute carrier family 49 member 4 OS=Homo sapiens OX=9606 GN=SLC49A4 PE=1 SV=1 && PF07690:Major Facilitator Superfamily	-
103389954	194.594	122.312	136.752	33.3622	61.7705	42.1196	151.219	45.7508	1.72917	9.16e-06	0.000228155	cdk2ap1	NC_024320.1	18159121	18161862	-	812	protein_coding	cyclin dependent kinase 2 associated protein 1%2C transcript variant X2 && sp|O14519|CDKA1_HUMAN Cyclin-dependent kinase 2-associated protein 1 OS=Homo sapiens OX=9606 GN=CDK2AP1 PE=1 SV=1 && PF09806:Cyclin-dependent kinase 2-associated protein	-
103391580	128.853	127.367	287.457	58.3838	35.4608	35.0997	181.226	42.9815	2.07547	9.22e-06	0.000229036	pde11a	NC_024322.1	1570840	1608351	-	7357	protein_coding	phosphodiesterase 11A && sp|Q1KKS3|PDE11_TAKRU Dual 3',5'-cyclic-AMP and -GMP phosphodiesterase 11A OS=Takifugu rubripes OX=31033 GN=pde11a PE=3 SV=1 && PF01590:GAF domain|PF00233:3'5'-cyclic nucleotide phosphodiesterase	-
103397595	1955.59	1424.28	1148.9	4894.86	3554.09	3245.22	1509.59	3898.06	-1.36851	9.23e-06	0.000229036	LOC103397595	NC_024328.1	5219530	5226291	-	3428	protein_coding	glycine dehydrogenase (decarboxylating)%2C mitochondrial-like && sp|P15505|GCSP_CHICK Glycine dehydrogenase (decarboxylating), mitochondrial OS=Gallus gallus OX=9031 GN=GLDC PE=1 SV=2 && -	-
103382330	725.784	592.356	883.768	262.727	375.198	268.763	733.97	302.23	1.28099	9.26e-06	0.000229505	atpaf2	NC_024314.1	13465136	13468581	+	1640	protein_coding	ATP synthase mitochondrial F1 complex assembly factor 2%2C transcript variant X1 && sp|Q91YY4|ATPF2_MOUSE ATP synthase mitochondrial F1 complex assembly factor 2 OS=Mus musculus OX=10090 GN=Atpaf2 PE=1 SV=1 && PF07542:ATP12 chaperone protein	-
103383049	355.88	145.562	143.263	53.171	48.0437	58.1652	214.902	53.1266	2.01636	9.63e-06	0.000238174	glipr1	NC_024314.1	29016408	29019620	+	1346	protein_coding	GLI pathogenesis related 1%2C transcript variant X2 && sp|Q32LB5|GPRL1_BOVIN GLIPR1-like protein 1 OS=Bos taurus OX=9913 GN=GLIPR1L1 PE=1 SV=1 && PF00188:Cysteine-rich secretory protein family	-
103394433	1211.39	1494.03	1816.84	4295.38	3372.21	2912.27	1507.42	3526.62	-1.22625	9.88e-06	0.00024405	LOC103394433	NC_024324.1	11060816	11073821	-	5588	protein_coding	protein FAM83H-like && sp|Q1LVV0|FA83H_DANRE Protein FAM83H OS=Danio rerio OX=7955 GN=fam83h PE=3 SV=1 && PF07894:FAM83 A-H	-
103380289	167.421	94.0087	224.198	35.4473	52.6193	42.1196	161.876	43.3954	1.90187	1e-05	0.000246916	LOC103380289	NC_024312.1	13270910	13279587	+	2149	protein_coding	5'-nucleotidase domain-containing protein 3 && sp|Q86UY8|NT5D3_HUMAN 5'-nucleotidase domain-containing protein 3 OS=Homo sapiens OX=9606 GN=NT5DC3 PE=1 SV=1 && PF05761:5' nucleotidase family	-
103399129	13.1483	36.3905	20.4662	71.9372	108.67	158.45	23.335	113.019	-2.28329	1e-05	0.000247443	LOC103399129	NW_007585774.1	7	1346	-	791	pseudogene	- && sp|Q91487|RL13A_SALTR 60S ribosomal protein L13a (Fragment) OS=Salmo trutta OX=8032 GN=rpl13a PE=2 SV=1 && -	-
103388488	621.475	114.226	438.163	45.873	93.7996	54.1538	391.288	64.6088	2.60038	1.02e-05	0.000249963	LOC103388488	NC_024319.1	10873574	10875080	-	692	protein_coding	allograft inflammatory factor 1-like%2C transcript variant X2 && sp|P55009|AIF1_RAT Allograft inflammatory factor 1 OS=Rattus norvegicus OX=10116 GN=Aif1 PE=2 SV=1 && -	-
103384691	1345.51	1112.94	1346.12	447.262	690.914	569.618	1268.19	569.265	1.15606	1.02e-05	0.000251431	nsfl1c	NC_024316.1	4863557	4900535	+	2132	protein_coding	NSFL1 cofactor%2C transcript variant X2 && sp|Q3SZC4|NSF1C_BOVIN NSFL1 cofactor p47 OS=Bos taurus OX=9913 GN=NSFL1C PE=2 SV=1 && PF00789:UBX domain|PF14555:UBA-like domain|PF08059:SEP domain	-
107990066	4.38276	0	2.79085	50.0433	101.807	11.0313	2.3912	54.2938	-4.47675	1.03e-05	0.000252852	LOC107990066	NC_024325.1	1167187	1202231	+	4764	lncRNA	uncharacterized LOC107990066%2C transcript variant X1 && sp|Q9Z0E8|S22A5_MOUSE Solute carrier family 22 member 5 OS=Mus musculus OX=10090 GN=Slc22a5 PE=1 SV=1 && -	-
103379514	1626	1492.01	1427.98	3871.06	4140.91	2496.09	1515.33	3502.69	-1.20872	1.04e-05	0.000255905	LOC103379514	NC_024312.1	1305676	1349342	-	8905	protein_coding	low-density lipoprotein receptor-related protein 5%2C transcript variant X1 && sp|Q91VN0|LRP5_MOUSE Low-density lipoprotein receptor-related protein 5 OS=Mus musculus OX=10090 GN=Lrp5 PE=1 SV=3 && PF14670:Coagulation Factor Xa inhibitory site|PF00058:Low-density lipoprotein receptor repeat class B|PF00057:Low-density lipoprotein receptor domain class A	-
103394498	42.951	26.282	39.0719	130.321	88.0801	127.362	36.1016	115.254	-1.67213	1.05e-05	0.00025626	LOC103394498	NC_024324.1	11800765	11811913	-	4257	protein_coding	glucocorticoid-induced transcript 1 protein && sp|Q8K3I9|GLCI1_MOUSE Glucocorticoid-induced transcript 1 protein OS=Mus musculus OX=10090 GN=Glcci1 PE=1 SV=1 && PF15388:Protein Family FAM117	-
103385704	485.609	379.067	538.634	218.939	217.341	160.456	467.77	198.912	1.2347	1.06e-05	0.000257857	grpel1	NC_024307.1	22698332	22700433	-	1220	protein_coding	GrpE like 1%2C mitochondrial && sp|Q9HAV7|GRPE1_HUMAN GrpE protein homolog 1, mitochondrial OS=Homo sapiens OX=9606 GN=GRPEL1 PE=1 SV=2 && PF01025:GrpE	-
103398137	966.836	790.482	565.612	2789.91	2786.53	1436.08	774.31	2337.51	-1.59384	1.06e-05	0.000259438	LOC103398137	NC_024328.1	15793366	15798955	+	2032	protein_coding	arrestin domain-containing protein 3-like && - && PF02752:Arrestin (or S-antigen), C-terminal domain|PF00339:Arrestin (or S-antigen), N-terminal domain	-
103390685	525.054	398.274	688.409	144.917	232.211	96.2735	537.246	157.801	1.76925	1.07e-05	0.000259989	ppid	NC_024321.1	5419188	5424555	-	1593	protein_coding	peptidylprolyl isomerase D && sp|P26882|PPID_BOVIN Peptidyl-prolyl cis-trans isomerase D OS=Bos taurus OX=9913 GN=PPID PE=1 SV=6 && PF00160:Cyclophilin type peptidyl-prolyl cis-trans isomerase/CLD	-
103379360	175.31	188.017	117.216	375.325	619.992	379.077	160.181	458.131	-1.51583	1.08e-05	0.000263103	nfatc3	NC_024311.1	17835079	17879897	+	4196	protein_coding	nuclear factor of activated T cells 3%2C transcript variant X1 && sp|P97305|NFAC3_MOUSE Nuclear factor of activated T-cells, cytoplasmic 3 OS=Mus musculus OX=10090 GN=Nfatc3 PE=1 SV=1 && PF16179:Rel homology dimerisation domain|PF00554:Rel homology DNA-binding domain	RHD
103382158	829.217	982.543	1046.57	493.135	416.379	296.843	952.776	402.119	1.24472	1.08e-05	0.000263103	LOC103382158	NC_024314.1	12374324	12380460	+	1353	protein_coding	uncharacterized protein C17orf62 homolog%2C transcript variant X2 && sp|Q6DGA7|CYBC1_DANRE Cytochrome b-245 chaperone 1 homolog OS=Danio rerio OX=7955 GN=cybc1 PE=2 SV=1 && PF15169:Domain of unknown function (DUF4564)	-
103383919	65.7413	168.811	7.44226	2.08514	5.71949	4.0114	80.665	3.93867	4.36163	1.08e-05	0.000263103	LOC103383919	NC_024315.1	12541498	12558354	+	4905	protein_coding	complement C3-like && sp|P98093|CO3_ONCMY Complement C3 (Fragment) OS=Oncorhynchus mykiss OX=8022 GN=c3 PE=1 SV=1 && PF00207:Alpha-2-macroglobulin family|PF17789:Macroglobulin domain MG4|PF17791:Macroglobulin domain MG3|PF01835:MG2 domain|PF17790:Macroglobulin domain MG1|PF01759:UNC-6/NTR/C345C module|PF07678:A-macroglobulin TED domain|PF07703:Alpha-2-macroglobulin bait region domain|PF07677:A-ma…	-
103393646	915.996	728.82	568.403	296.089	227.636	347.989	737.74	290.571	1.34364	1.09e-05	0.000263103	LOC103393646	NC_024323.1	16285717	16287706	-	1586	protein_coding	N-acetylmuramoyl-L-alanine amidase-like%2C transcript variant X1 && sp|Q8VCS0|PGRP2_MOUSE N-acetylmuramoyl-L-alanine amidase OS=Mus musculus OX=10090 GN=Pglyrp2 PE=1 SV=1 && PF01510:N-acetylmuramoyl-L-alanine amidase	-
103385418	1628.63	1174.6	2229.89	629.711	636.007	727.065	1677.71	664.261	1.33668	1.1e-05	0.000266265	ptges3	NC_024316.1	18950809	18954880	-	2555	protein_coding	prostaglandin E synthase 3 && sp|Q3ZBF7|TEBP_BOVIN Prostaglandin E synthase 3 OS=Bos taurus OX=9913 GN=PTGES3 PE=1 SV=1 && -	-
103381239	2630.53	1239.3	1055.87	446.219	219.628	529.504	1641.9	398.451	2.04254	1.11e-05	0.000267159	LOC103381239	NC_024313.1	11776506	11787274	-	3794	protein_coding	thrombospondin-1-like && sp|Q28178|TSP1_BOVIN Thrombospondin-1 OS=Bos taurus OX=9913 GN=THBS1 PE=2 SV=2 && PF00093:von Willebrand factor type C domain|PF00090:Thrombospondin type 1 domain|PF05735:Thrombospondin C-terminal region|PF02412:Thrombospondin type 3 repeat	-
103377911	132.359	95.0196	102.331	243.961	369.479	250.712	109.903	288.051	-1.38799	1.11e-05	0.000267159	LOC103377911	NC_024310.1	7755239	7765200	-	4944	protein_coding	uncharacterized LOC103377911%2C transcript variant X2 && - && -	-
103386210	80.6427	124.334	217.686	302.345	787.001	879.498	140.888	656.282	-2.21999	1.11e-05	0.000267159	LOC103386210	NC_024317.1	8381244	8387998	-	2640	protein_coding	interferon-induced GTP-binding protein Mx%2C transcript variant X1 && sp|Q5U752|MX_SOLSE Interferon-induced GTP-binding protein Mx OS=Solea senegalensis OX=28829 GN=mx PE=2 SV=1 && PF02212:Dynamin GTPase effector domain|PF00350:Dynamin family|PF01031:Dynamin central region	-
103378446	241.928	208.234	448.396	72.9798	110.958	82.2336	299.52	88.7238	1.75674	1.11e-05	0.000267904	snrpa	NC_024310.1	16731958	16735548	+	1347	protein_coding	small nuclear ribonucleoprotein polypeptide A%2C transcript variant X2 && sp|Q06AA4|SNRPA_PIG U1 small nuclear ribonucleoprotein A OS=Sus scrofa OX=9823 GN=SNRPA PE=1 SV=1 && PF00076:RNA recognition motif. (a.k.a. RRM, RBD, or RNP domain)	-
103379477	171.804	208.234	164.66	512.944	327.155	483.373	181.566	441.157	-1.28196	1.12e-05	0.00026846	zcchc14	NC_024312.1	608077	632373	+	6801	protein_coding	zinc finger CCHC-type containing 14 && sp|Q8VIG0|ZCH14_MOUSE Zinc finger CCHC domain-containing protein 14 OS=Mus musculus OX=10090 GN=Zcchc14 PE=2 SV=1 && -	-
novel.562	165.668	87.9436	167.451	373.24	414.091	365.037	140.354	384.122	-1.45065	1.13e-05	0.000271342	-	NC_024323.1	6690488	6694165	+	1248	-	- && - && -	-
103377539	153.396	113.215	472.583	19.8088	25.1657	60.1709	246.398	35.0485	2.8112	1.16e-05	0.000277062	ncapg2	NC_024309.1	15387285	15396043	-	3879	protein_coding	non-SMC condensin II complex subunit G2 && sp|E7FH61|CNDG2_DANRE Condensin-2 complex subunit G2 OS=Danio rerio OX=7955 GN=ncapg2 PE=3 SV=2 && -	-
103377173	6154.27	12547.6	7774.37	2805.55	3508.33	3464.84	8825.42	3259.58	1.43696	1.16e-05	0.000277921	LOC103377173	NC_024309.1	9782964	9788796	+	2966	protein_coding	polypeptide N-acetylgalactosaminyltransferase 17-like && sp|Q7TT15|GLT17_MOUSE Polypeptide N-acetylgalactosaminyltransferase 17 OS=Mus musculus OX=10090 GN=Galnt17 PE=1 SV=1 && PF00652:Ricin-type beta-trefoil lectin domain|PF00535:Glycosyl transferase family 2	-
103388226	760.846	1668.91	822.37	363.856	350.033	359.02	1084.04	357.636	1.59954	1.16e-05	0.000278389	mmp14	NC_024307.1	27089279	27103498	-	2624	protein_coding	matrix metallopeptidase 14 && sp|Q10739|MMP14_RAT Matrix metalloproteinase-14 OS=Rattus norvegicus OX=10116 GN=Mmp14 PE=2 SV=2 && PF11857:Domain of unknown function (DUF3377)|PF00413:Matrixin|PF00045:Hemopexin|PF01471:Putative peptidoglycan binding domain	-
103385490	76.26	79.8569	40.0021	413.9	807.592	111.316	65.373	444.269	-2.76445	1.17e-05	0.000279807	tmcc1	NC_024316.1	19772582	19803042	-	4058	protein_coding	transmembrane and coiled-coil domain family 1%2C transcript variant X2 && sp|Q69ZZ6|TMCC1_MOUSE Transmembrane and coiled-coil domains protein 1 OS=Mus musculus OX=10090 GN=Tmcc1 PE=1 SV=2 && PF10267:Predicted transmembrane and coiled-coil 2 protein	-
103385325	391.818	333.579	523.749	152.215	197.894	162.461	416.382	170.857	1.28615	1.19e-05	0.000283701	LOC103385325	NC_024316.1	17117416	17121283	+	1633	protein_coding	eukaryotic translation initiation factor 4E type 3-like && sp|Q66HY7|IF4E3_DANRE Eukaryotic translation initiation factor 4E type 3 OS=Danio rerio OX=7955 GN=eif4e3 PE=2 SV=1 && PF01652:Eukaryotic initiation factor 4E	-
103387167	431.263	580.226	392.579	926.843	1036.37	1058.01	468.023	1007.07	-1.10603	1.2e-05	0.00028587	LOC103387167	NC_024318.1	5693189	5698723	-	2146	protein_coding	high-affinity choline transporter 1-like && sp|Q9GZV3|SC5A7_HUMAN High affinity choline transporter 1 OS=Homo sapiens OX=9606 GN=SLC5A7 PE=1 SV=1 && PF00474:Sodium:solute symporter family	-
103392741	93.791	88.9545	133.03	279.408	219.628	330.94	105.259	276.659	-1.39448	1.21e-05	0.000286022	LOC103392741	NC_024323.1	3929573	3934549	-	1791	protein_coding	ADP-ribosylation factor-like protein 5B && sp|Q96KC2|ARL5B_HUMAN ADP-ribosylation factor-like protein 5B OS=Homo sapiens OX=9606 GN=ARL5B PE=1 SV=1 && PF00025:ADP-ribosylation factor family	-
103390491	269.978	161.735	293.039	29.1919	90.3679	28.0798	241.584	49.2132	2.30054	1.21e-05	0.000286022	fam136a	NC_024320.1	28839511	28841048	-	952	protein_coding	family with sequence similarity 136 member A && sp|Q6PBU0|F136A_DANRE Protein FAM136A OS=Danio rerio OX=7955 GN=fam136a PE=2 SV=1 && PF05811:Eukaryotic protein of unknown function (DUF842)	-
103382240	5123.44	8188.87	3949.05	14580.3	19699.1	14213.4	5753.79	16164.3	-1.49025	1.21e-05	0.00028687	a1cf	NC_024314.1	14487482	14494647	-	2516	protein_coding	APOBEC1 complementation factor%2C transcript variant X1 && sp|Q923K9|A1CF_RAT APOBEC1 complementation factor OS=Rattus norvegicus OX=10116 GN=A1cf PE=1 SV=1 && PF00076:RNA recognition motif. (a.k.a. RRM, RBD, or RNP domain)|PF14709:double strand RNA binding domain from DEAD END PROTEIN 1	-
103397909	91.1613	115.237	186.987	21.8939	36.6047	42.1196	131.128	33.5394	1.96676	1.22e-05	0.000288493	psat1	NC_024328.1	12564577	12568654	+	1579	protein_coding	phosphoserine aminotransferase 1 && sp|Q9Y617|SERC_HUMAN Phosphoserine aminotransferase OS=Homo sapiens OX=9606 GN=PSAT1 PE=1 SV=2 && PF00266:Aminotransferase class-V	-
103393161	1263.11	424.556	684.688	117.81	276.823	137.39	790.785	177.341	2.158	1.22e-05	0.000288493	LOC103393161	NC_024308.1	1129407	1134158	+	2619	protein_coding	calreticulin-like && sp|P15253|CALR_RABIT Calreticulin OS=Oryctolagus cuniculus OX=9986 GN=CALR PE=1 SV=1 && PF00262:Calreticulin family	-
103393360	101.68	54.5857	142.333	8.34055	4.57559	26.0741	99.533	12.9967	2.92689	1.23e-05	0.000288696	haus5	NC_024308.1	1675540	1681566	-	2896	protein_coding	HAUS augmin like complex subunit 5%2C transcript variant X2 && sp|Q9D786|HAUS5_MOUSE HAUS augmin-like complex subunit 5 OS=Mus musculus OX=10090 GN=Haus5 PE=1 SV=1 && -	-
103383921	144.631	378.057	19.5359	17.7237	14.8707	12.0342	180.741	14.8762	3.60274	1.24e-05	0.00029082	LOC103383921	NC_024315.1	12561811	12576127	-	5997	protein_coding	complement C3-like && sp|P98093|CO3_ONCMY Complement C3 (Fragment) OS=Oncorhynchus mykiss OX=8022 GN=c3 PE=1 SV=1 && PF07677:A-macroglobulin receptor binding domain|PF01835:MG2 domain|PF00207:Alpha-2-macroglobulin family|PF17789:Macroglobulin domain MG4|PF17790:Macroglobulin domain MG1|PF07703:Alpha-2-macroglobulin bait region domain|PF01821:Anaphylotoxin-like domain|PF07678:A-macroglobulin TED d…	-
103387983	842.366	1057.35	1231.69	313.813	514.754	441.253	1043.8	423.273	1.30246	1.24e-05	0.00029168	LOC103387983	NC_024319.1	1711813	1722710	-	4106	protein_coding	valine--tRNA ligase%2C transcript variant X1 && sp|P49696|SYVC_TAKRU Valine--tRNA ligase OS=Takifugu rubripes OX=31033 GN=vars1 PE=3 SV=1 && PF08264:Anticodon-binding domain of tRNA|PF00043:Glutathione S-transferase, C-terminal domain|PF00133:tRNA synthetases class I (I, L, M and V)	-
103393949	19278	48833	1374.96	195254	337784	314031	23162	282356	-3.60769	1.27e-05	0.00029691	LOC103393949	NC_024324.1	2424164	2425614	-	1028	protein_coding	apolipoprotein A-IV-like && - && PF01442:Apolipoprotein A1/A4/E domain	-
103390347	266.472	188.017	233.501	582.796	1000.91	472.342	229.33	685.349	-1.57846	1.28e-05	0.00030038	LOC103390347	NC_024320.1	26964570	26969483	-	2231	protein_coding	FSD1-like protein%2C transcript variant X5 && sp|Q8BYN5|FSD1L_MOUSE FSD1-like protein OS=Mus musculus OX=10090 GN=Fsd1l PE=1 SV=2 && PF00622:SPRY domain	-
103389325	610.956	924.925	844.696	2129.97	1449.32	2297.53	793.526	1958.94	-1.30409	1.29e-05	0.000301317	LOC103389325	NC_024320.1	5896619	5904031	-	3129	protein_coding	carcinoembryonic antigen-related cell adhesion molecule 7-like%2C transcript variant X1 && - && -	-
novel.619	310.299	301.232	366.531	94.8737	141.843	157.447	326.021	131.388	1.31122	1.31e-05	0.000306776	-	NC_024324.1	11637376	11640978	-	1216	-	- && sp|Q767L0|ABCF1_PIG ATP-binding cassette sub-family F member 1 OS=Sus scrofa OX=9823 GN=ABCF1 PE=3 SV=1 && PF00005:ABC transporter	-
novel.241	284.003	275.961	381.416	1018.59	605.122	745.117	313.793	789.609	-1.33142	1.32e-05	0.000307837	-	NC_024314.1	19533579	19536772	+	1477	-	- && - && -	-
103386601	1383.2	1469.77	1128.43	3924.23	5181.86	2284.49	1327.13	3796.86	-1.51644	1.32e-05	0.000308326	LOC103386601	NC_024317.1	16382915	16394140	-	2216	protein_coding	protein kinase C and casein kinase substrate in neurons protein 1-like%2C transcript variant X2 && sp|Q4V920|PACN1_DANRE Protein kinase C and casein kinase substrate in neurons protein 1 OS=Danio rerio OX=7955 GN=pacsin1b PE=1 SV=1 && PF14604:Variant SH3 domain|PF00611:Fes/CIP4, and EFC/F-BAR homology domain	-
103396903	1707.52	2037.87	3955.56	747.522	808.736	957.721	2566.98	837.993	1.61501	1.33e-05	0.000309046	lmnb2	NC_024308.1	8299803	8310944	+	4737	protein_coding	lamin B2 && sp|P21910|LAML2_XENLA Lamin-L(II) OS=Xenopus laevis OX=8355 PE=2 SV=1 && PF00038:Intermediate filament protein|PF00932:Lamin Tail Domain	-
103382906	307.669	246.647	239.083	478.539	991.759	739.1	264.466	736.466	-1.47695	1.33e-05	0.000309046	LOC103382906	NC_024314.1	25595143	25599801	+	2505	protein_coding	cyclin-dependent kinase inhibitor 1-like && sp|P46527|CDN1B_HUMAN Cyclin-dependent kinase inhibitor 1B OS=Homo sapiens OX=9606 GN=CDKN1B PE=1 SV=1 && PF02234:Cyclin-dependent kinase inhibitor	-
103396273	276.99	918.859	464.211	91.746	136.124	24.0684	553.354	83.9794	2.72166	1.35e-05	0.000312766	foxq1	NC_024326.1	6416155	6417946	-	1792	protein_coding	forkhead box Q1 && sp|Q63244|FOXQ1_RAT Forkhead box protein Q1 OS=Rattus norvegicus OX=10116 GN=Foxq1 PE=1 SV=3 && PF00250:Forkhead domain	Fork head
103395881	397.954	1267.6	641.895	185.577	17.1585	48.1367	769.15	83.6241	3.20022	1.35e-05	0.000312882	LOC103395881	NC_024326.1	633115	637091	+	2792	protein_coding	inhibin beta C chain-like && sp|Q99988|GDF15_HUMAN Growth/differentiation factor 15 OS=Homo sapiens OX=9606 GN=GDF15 PE=1 SV=3 && PF00019:Transforming growth factor beta like domain	-
103377200	427.757	392.208	370.252	839.268	698.921	1073.05	396.739	870.412	-1.13372	1.36e-05	0.000314778	bclaf3	NC_024309.1	9705275	9713098	-	2764	protein_coding	BCLAF1 and THRAP3 family member 3 && sp|A2AJT9|BCLA3_HUMAN BCLAF1 and THRAP3 family member 3 OS=Homo sapiens OX=9606 GN=BCLAF3 PE=1 SV=1 && PF15440:THRAP3/BCLAF1 family	-
103380483	75.3834	39.423	70.7015	181.407	266.528	157.447	61.836	201.794	-1.70269	1.37e-05	0.000315882	LOC103380483	NC_024312.1	16330527	16347634	-	7310	protein_coding	unconventional myosin-Va-like%2C transcript variant X2 && sp|Q9Y4I1|MYO5A_HUMAN Unconventional myosin-Va OS=Homo sapiens OX=9606 GN=MYO5A PE=1 SV=2 && -	-
103396016	89.4082	15.1627	20.4662	0	2.28779	2.0057	41.679	1.43116	4.87766	1.38e-05	0.000319311	LOC103396016	NC_024326.1	1827634	1830110	-	1328	protein_coding	G-protein coupled receptor 35-like%2C transcript variant X2 && sp|Q9Y2T6|GPR55_HUMAN G-protein coupled receptor 55 OS=Homo sapiens OX=9606 GN=GPR55 PE=1 SV=2 && PF00001:7 transmembrane receptor (rhodopsin family)	-
103386508	16.6545	5.05423	7.44226	33.3622	66.3461	138.393	9.71699	79.3671	-3.02118	1.39e-05	0.000319839	barx1	NC_024317.1	13905341	13909287	-	1864	protein_coding	BARX homeobox 1 && sp|Q503F2|BARX1_DANRE Homeobox protein BarH-like 1 OS=Danio rerio OX=7955 GN=barx1 PE=2 SV=2 && PF00046:Homeodomain	Homeobox
103398277	437.399	453.87	286.527	1238.57	780.138	987.806	392.599	1002.17	-1.35227	1.39e-05	0.000319839	LOC103398277	NC_024328.1	19938136	19981697	-	10908	protein_coding	SET-binding protein-like && sp|Q9Z180|SETBP_MOUSE SET-binding protein OS=Mus musculus OX=10090 GN=Setbp1 PE=1 SV=4 && -	-
103377642	12.2717	64.6942	25.1176	1151	2111.63	110.313	34.0278	1124.31	-5.04766	1.41e-05	0.000324913	LOC103377642	NC_024310.1	2408672	2414993	+	2346	protein_coding	fatty aldehyde dehydrogenase-like && sp|P51648|AL3A2_HUMAN Aldehyde dehydrogenase family 3 member A2 OS=Homo sapiens OX=9606 GN=ALDH3A2 PE=1 SV=1 && PF00171:Aldehyde dehydrogenase family	-
103395695	3.5062	4.04339	0	67.767	8.00728	101.288	2.51653	59.0207	-4.55835	1.42e-05	0.000325371	LOC103395695	NC_024325.1	17068058	17073876	+	1622	protein_coding	claudin-15-like%2C transcript variant X1 && sp|D3ZQJ0|CLD15_RAT Claudin-15 OS=Rattus norvegicus OX=10116 GN=Cldn15 PE=1 SV=1 && PF00822:PMP-22/EMP/MP20/Claudin family	-
103382968	424.251	162.746	160.939	57.3413	33.173	71.2023	249.312	53.9055	2.20779	1.43e-05	0.000327705	slc16a7	NC_024314.1	27552650	27569950	-	6409	protein_coding	solute carrier family 16 member 7%2C transcript variant X4 && sp|O60669|MOT2_HUMAN Monocarboxylate transporter 2 OS=Homo sapiens OX=9606 GN=SLC16A7 PE=1 SV=2 && PF07690:Major Facilitator Superfamily	-
103396813	114.828	166.79	270.712	525.455	507.89	632.798	184.11	555.381	-1.59337	1.46e-05	0.000333445	LOC103396813	NC_024326.1	14140081	14221165	-	2957	protein_coding	kin of IRRE-like protein 1 && sp|Q80W68|KIRR1_MOUSE Kin of IRRE-like protein 1 OS=Mus musculus OX=10090 GN=Kirrel1 PE=1 SV=1 && PF07679:Immunoglobulin I-set domain	-
103389813	26.2965	53.5749	18.6056	265.855	352.32	64.1823	32.8257	227.453	-2.79494	1.46e-05	0.000333445	ftcd	NC_024320.1	16255918	16259915	+	1977	protein_coding	formimidoyltransferase cyclodeaminase && sp|O88618|FTCD_RAT Formimidoyltransferase-cyclodeaminase OS=Rattus norvegicus OX=10116 GN=Ftcd PE=1 SV=4 && PF02971:Formiminotransferase domain|PF07837:Formiminotransferase domain, N-terminal subdomain|PF04961:Formiminotransferase-cyclodeaminase	-
103378707	106293	56245.5	139788	25651.4	39591.4	31310.9	100776	32184.6	1.64671	1.48e-05	0.000338285	LOC103378707	NC_024311.1	4070936	4075288	+	1123	protein_coding	ferritin%2C heavy subunit%2C transcript variant X1 && sp|P49946|FRIH_SALSA Ferritin, heavy subunit OS=Salmo salar OX=8030 PE=2 SV=1 && PF00210:Ferritin-like domain	-
103384319	3548.28	2215.78	5298.89	871.587	1320.06	1350.84	3687.65	1180.83	1.64296	1.49e-05	0.000340892	hmgb2	NC_024315.1	18460722	18463841	-	1581	protein_coding	high mobility group box 2 && sp|B2RPK0|HGB1A_HUMAN Putative high mobility group protein B1-like 1 OS=Homo sapiens OX=9606 GN=HMGB1P1 PE=5 SV=1 && PF09011:HMG-box domain|PF00505:HMG (high mobility group) box	HMG
novel.259	81.5193	179.931	332.111	46.9156	24.0218	41.1168	197.854	37.3514	2.40272	1.5e-05	0.000341101	-	NC_024314.1	13016191	13018679	-	1747	-	- && - && -	-
103384306	32.4324	19.2061	18.6056	77.1501	73.2094	96.2735	23.4147	82.211	-1.80767	1.52e-05	0.000346499	LOC103384306	NC_024315.1	18540241	18546389	-	2591	protein_coding	ankyrin repeat and SOCS box protein 5-like%2C transcript variant X2 && sp|Q9D1A4|ASB5_MOUSE Ankyrin repeat and SOCS box protein 5 OS=Mus musculus OX=10090 GN=Asb5 PE=2 SV=1 && PF07525:SOCS box|PF12796:Ankyrin repeats (3 copies)	-
103387506	25.42	24.2603	18.6056	84.4481	57.1949	118.336	22.762	86.6597	-1.93067	1.52e-05	0.000346499	LOC103387506	NC_024318.1	11620241	11623776	+	601	lncRNA	uncharacterized LOC103387506 && sp|B5FZ19|EIF3I_TAEGU Eukaryotic translation initiation factor 3 subunit I OS=Taeniopygia guttata OX=59729 GN=EIF3I PE=2 SV=2 && -	-
103399989	14.9014	9.09762	5.58169	42.7453	53.7632	52.1481	9.86023	49.5522	-2.32209	1.53e-05	0.000346863	LOC103399989	NC_024308.1	15800010	15824906	-	1615	protein_coding	procollagen galactosyltransferase 2 && sp|Q8IYK4|GT252_HUMAN Procollagen galactosyltransferase 2 OS=Homo sapiens OX=9606 GN=COLGALT2 PE=1 SV=1 && PF01755:Glycosyltransferase family 25 (LPS biosynthesis protein)|PF13704:Glycosyl transferase family 2	-
103379566	4.38276	11.1193	1.86056	33.3622	41.1803	69.1966	5.78754	47.913	-3.06722	1.53e-05	0.000346863	LOC103379566	NC_024312.1	1949498	1957892	-	2538	protein_coding	cytochrome P450 2B6-like && sp|P00176|CP2B1_RAT Cytochrome P450 2B1 OS=Rattus norvegicus OX=10116 GN=Cyp2b1 PE=1 SV=1 && PF00067:Cytochrome P450	-
103399906	3160.84	307.297	734.923	197.045	202.47	112.319	1401.02	170.611	3.03807	1.54e-05	0.000349476	LOC103399906	NC_024308.1	14385149	14386690	+	960	protein_coding	granzyme G-like%2C transcript variant X1 && sp|P13366|GRAG_MOUSE Granzyme G OS=Mus musculus OX=10090 GN=Gzmg PE=1 SV=1 && PF00089:Trypsin	-
103397904	80.6427	77.8352	53.0261	308.6	153.282	205.584	70.5013	222.489	-1.65864	1.55e-05	0.000349663	gpx8	NC_024328.1	12520927	12522986	+	1289	protein_coding	glutathione peroxidase 8 (putative)%2C transcript variant X2 && sp|Q4RSM6|GPX8_TETNG Probable glutathione peroxidase 8 OS=Tetraodon nigroviridis OX=99883 GN=gpx8 PE=3 SV=1 && PF00255:Glutathione peroxidase	-
103383022	808.18	572.139	803.764	305.473	378.63	307.875	728.028	330.659	1.13946	1.55e-05	0.000350384	strap	NC_024314.1	28013695	28019722	-	1575	protein_coding	serine/threonine kinase receptor associated protein && sp|Q5E959|STRAP_BOVIN Serine-threonine kinase receptor-associated protein OS=Bos taurus OX=9913 GN=STRAP PE=2 SV=1 && PF00400:WD domain, G-beta repeat	-
103378358	570.635	591.345	931.213	258.557	268.816	322.917	697.731	283.43	1.29943	1.55e-05	0.000350384	timm50	NC_024310.1	15447756	15468031	+	3215	protein_coding	translocase of inner mitochondrial membrane 50%2C transcript variant X1 && sp|Q6NWD4|TIM50_DANRE Mitochondrial import inner membrane translocase subunit TIM50 OS=Danio rerio OX=7955 GN=timm50 PE=2 SV=2 && PF03031:NLI interacting factor-like phosphatase	-
novel.109	43.8276	38.4122	27.9085	92.7886	120.109	108.308	36.7161	107.069	-1.54251	1.55e-05	0.000350384	-	NC_024309.1	3133761	3135598	-	1717	-	- && - && -	-
103392985	1269.25	524.629	697.712	323.196	218.484	198.564	830.529	246.748	1.75122	1.56e-05	0.000351485	cpox	NC_024308.1	1417027	1421412	+	2440	protein_coding	coproporphyrinogen oxidase%2C transcript variant X3 && sp|P36551|HEM6_HUMAN Oxygen-dependent coproporphyrinogen-III oxidase, mitochondrial OS=Homo sapiens OX=9606 GN=CPOX PE=1 SV=3 && PF01218:Coproporphyrinogen III oxidase	-
107990054	20.1607	23.2495	39.0719	2.08514	1.1439	3.00855	27.494	2.07919	3.70638	1.57e-05	0.000353027	nr5a2	NC_024308.1	3828192	3830287	+	2096	protein_coding	nuclear receptor subfamily 5 group A member 2 && sp|O42101|NR5A2_CHICK Nuclear receptor subfamily 5 group A member 2 OS=Gallus gallus OX=9031 GN=NR5A2 PE=2 SV=1 && -	-
103393512	313.805	292.135	165.59	1031.1	1148.47	492.399	257.177	890.657	-1.79189	1.57e-05	0.000353027	abat	NC_024323.1	13669814	13676958	+	2116	protein_coding	4-aminobutyrate aminotransferase && sp|P50554|GABT_RAT 4-aminobutyrate aminotransferase, mitochondrial OS=Rattus norvegicus OX=10116 GN=Abat PE=1 SV=3 && PF00202:Aminotransferase class-III	-
103392828	220.891	103.106	346.995	14.596	24.0218	64.1823	223.664	34.2667	2.70372	1.58e-05	0.0003537	cenpx	NC_024323.1	5692759	5695930	+	1991	protein_coding	centromere protein X && sp|P0DJH7|CENPX_CHICK Centromere protein X OS=Gallus gallus OX=9031 GN=CENPX PE=1 SV=1 && -	-
103379351	4235.5	9533.29	3334.13	20570.9	19712.8	18430.4	5700.97	19571.4	-1.77951	1.59e-05	0.000355705	pepd	NC_024311.1	17192170	17202240	-	2246	protein_coding	peptidase D && sp|P12955|PEPD_HUMAN Xaa-Pro dipeptidase OS=Homo sapiens OX=9606 GN=PEPD PE=1 SV=3 && PF05195:Aminopeptidase P, N-terminal domain|PF00557:Metallopeptidase family M24	-
103381970	303.287	132.421	267.921	52.1284	50.3315	88.2507	234.543	63.5702	1.8823	1.6e-05	0.000357163	kif22	NC_024314.1	9564584	9571233	-	2139	protein_coding	kinesin family member 22%2C transcript variant X1 && sp|A8WFU8|KIF22_DANRE Kinesin-like protein KIF22 OS=Danio rerio OX=7955 GN=kif22 PE=2 SV=1 && PF12836:Helix-hairpin-helix motif|PF00225:Kinesin motor domain	-
107989022	5.25931	1.01085	2.79085	99.044	40.0364	12.0342	3.02033	50.3715	-4.04086	1.6e-05	0.000358118	LOC107989022	NC_024315.1	14520788	14529675	-	3651	protein_coding	nuclear factor interleukin-3-regulated protein-like%2C transcript variant X5 && sp|Q6IMZ0|NFIL3_RAT Nuclear factor interleukin-3-regulated protein OS=Rattus norvegicus OX=10116 GN=Nfil3 PE=2 SV=1 && -	TF_bZIP
103398224	336.596	245.636	138.612	1234.4	1705.55	451.282	240.281	1130.41	-2.23368	1.62e-05	0.000361148	gda	NC_024328.1	18753943	18765011	+	2335	protein_coding	guanine deaminase%2C transcript variant X1 && sp|Q9R111|GUAD_MOUSE Guanine deaminase OS=Mus musculus OX=10090 GN=Gda PE=1 SV=1 && PF01979:Amidohydrolase family	-
103395779	77.1365	193.072	55.8169	450.39	466.71	406.154	108.675	441.085	-2.02311	1.63e-05	0.000363515	LOC103395779	NC_024325.1	17205488	17211771	-	2603	protein_coding	F-box only protein 40-like%2C transcript variant X1 && sp|Q9UH90|FBX40_HUMAN F-box only protein 40 OS=Homo sapiens OX=9606 GN=FBXO40 PE=2 SV=2 && PF15966:F-box|PF15965:TRAF-like zinc-finger	-
107988050	344.485	540.803	481.886	935.184	1039.8	1004.85	455.725	993.28	-1.1246	1.64e-05	0.000364057	LOC107988050	NC_024314.1	28821205	28822908	-	927	protein_coding	beta-2-microglobulin && sp|O42197|B2MG_ICTPU Beta-2-microglobulin OS=Ictalurus punctatus OX=7998 GN=b2m PE=3 SV=1 && PF07654:Immunoglobulin C1-set domain	-
103395834	511.906	924.925	535.843	1798.43	1752.45	1484.22	657.558	1678.37	-1.35229	1.64e-05	0.000364508	scp2	NC_024326.1	332887	338548	+	1559	protein_coding	sterol carrier protein 2%2C transcript variant X1 && sp|O62742|SCP2_RABIT Sterol carrier protein 2 OS=Oryctolagus cuniculus OX=9986 GN=SCP2 PE=1 SV=1 && PF02803:Thiolase, C-terminal domain|PF00108:Thiolase, N-terminal domain	-
103382121	6527.68	6894.98	4751.88	16098.3	11603.7	12483.5	6058.18	13395.2	-1.14477	1.65e-05	0.000365238	sptbn5	NC_024307.1	16319114	16347541	-	12217	protein_coding	spectrin beta%2C non-erythrocytic 5%2C transcript variant X2 && sp|Q9NRC6|SPTN5_HUMAN Spectrin beta chain, non-erythrocytic 5 OS=Homo sapiens OX=9606 GN=SPTBN5 PE=1 SV=2 && PF00435:Spectrin repeat|PF00307:Calponin homology (CH) domain	-
103386784	213.878	235.527	319.087	505.646	613.129	593.686	256.164	570.82	-1.15596	1.65e-05	0.000365238	LOC103386784	NC_024317.1	19753793	19761474	-	1326	protein_coding	cyclin-D1-binding protein 1 homolog && sp|A3KNI7|CCDB1_DANRE Cyclin-D1-binding protein 1 homolog OS=Danio rerio OX=7955 GN=ccndbp1 PE=2 SV=2 && PF13324:Grap2 and cyclin-D-interacting	-
103388732	435.646	234.516	340.483	58.3838	138.412	97.2763	336.882	98.0239	1.78313	1.65e-05	0.000366073	LOC103388732	NC_024319.1	15604300	15606527	+	1792	protein_coding	calcium homeostasis modulator protein 6 && sp|Q561R8|CAHM6_RAT Calcium homeostasis modulator protein 6 OS=Rattus norvegicus OX=10116 GN=Calhm6 PE=1 SV=1 && PF14798:Calcium homeostasis modulator	-
103393553	587.289	324.482	389.788	2058.03	748.109	2205.26	433.853	1670.47	-1.94481	1.69e-05	0.000372961	LOC103393553	NC_024323.1	14118473	14128443	+	4159	protein_coding	endoplasmic reticulum membrane sensor NFE2L1-like && sp|Q14494|NF2L1_HUMAN Endoplasmic reticulum membrane sensor NFE2L1 OS=Homo sapiens OX=9606 GN=NFE2L1 PE=1 SV=1 && PF03131:bZIP Maf transcription factor	TF_bZIP
103386168	60.482	84.9111	68.8409	274.196	272.248	134.382	71.4113	226.942	-1.66876	1.71e-05	0.000377333	col4a6	NC_024307.1	23739936	23827187	+	8490	protein_coding	collagen type IV alpha 6 chain%2C transcript variant X2 && sp|P08122|CO4A2_MOUSE Collagen alpha-2(IV) chain OS=Mus musculus OX=10090 GN=Col4a2 PE=1 SV=4 && PF01391:Collagen triple helix repeat (20 copies)|PF01413:C-terminal tandem repeated domain in type 4 procollagen	-
103395612	579.4	551.922	1576.83	93.8312	106.382	294.838	902.717	165.017	2.45086	1.73e-05	0.000382087	uhrf1	NC_024308.1	6824831	6833019	+	3704	protein_coding	ubiquitin like with PHD and ring finger domains 1 && sp|E7EZF3|UHRF1_DANRE E3 ubiquitin-protein ligase UHRF1 OS=Danio rerio OX=7955 GN=uhrf1 PE=1 SV=1 && PF00240:Ubiquitin family|PF00628:PHD-finger|PF02182:SAD/SRA domain|PF12148:Tandem tudor domain within UHRF1	-
103394013	63.9882	38.4122	85.586	6.25541	14.8707	14.0399	62.6621	11.722	2.42253	1.75e-05	0.000385075	ankle1	NC_024308.1	2981561	2987989	-	4787	protein_coding	ankyrin repeat and LEM domain containing 1 && sp|A8VU90|ANKL1_MOUSE Ankyrin repeat and LEM domain-containing protein 1 OS=Mus musculus OX=10090 GN=Ankle1 PE=2 SV=1 && PF12796:Ankyrin repeats (3 copies)|PF03020:LEM domain	-
103391209	927.391	1413.16	249.316	5908.24	6411.55	2536.2	863.29	4952	-2.52018	1.77e-05	0.00038861	sfxn1	NC_024321.1	15513464	15523928	-	4847	protein_coding	sideroflexin 1 && sp|Q9H9B4|SFXN1_HUMAN Sideroflexin-1 OS=Homo sapiens OX=9606 GN=SFXN1 PE=1 SV=4 && PF03820:Tricarboxylate carrier	-
103377053	779.254	686.365	853.069	351.346	354.608	443.259	772.896	383.071	1.01239	1.77e-05	0.00038861	LOC103377053	NC_024309.1	6938583	6946584	-	3528	protein_coding	copine-3-like%2C transcript variant X1 && sp|O75131|CPNE3_HUMAN Copine-3 OS=Homo sapiens OX=9606 GN=CPNE3 PE=1 SV=1 && PF07002:Copine|PF00168:C2 domain	-
103382155	506.647	513.51	849.348	233.535	276.823	236.672	623.168	249.01	1.32383	1.81e-05	0.000398043	fdxr	NC_024314.1	12355325	12362240	-	2643	protein_coding	ferredoxin reductase && sp|P82861|ADRO_SALFO NADPH:adrenodoxin oxidoreductase, mitochondrial OS=Salvelinus fontinalis OX=8038 GN=fdxr PE=2 SV=1 && PF07992:Pyridine nucleotide-disulphide oxidoreductase	-
103393889	64.8648	65.705	39.0719	324.239	142.987	162.461	56.5472	209.896	-1.89283	1.83e-05	0.00039993	LOC103393889	NC_024324.1	1389791	1400459	-	3477	protein_coding	POU domain%2C class 2%2C transcription factor 2-like && sp|Q00196|PO2F2_MOUSE POU domain, class 2, transcription factor 2 OS=Mus musculus OX=10090 GN=Pou2f2 PE=2 SV=4 && PF00046:Homeodomain|PF00157:Pou domain - N-terminal to homeobox domain	Pou
[truncated: 1,443 more rows]

## Sheet: R vs S
Gene_id	R_1	R_2	R_3	S_1	S_2	S_3	R	S	log2FoldChange	pvalue	padj	gene_name	gene_chr	gene_start	gene_end	gene_strand	gene_length	gene_biotype	gene_description	Family
[truncated: 1,986 more rows]
